# Supplementary material for: MicroRNA Expression Signatures in Clear Cell Renal Cell Carcinoma: High-Throughput Searching for Key miRNA Markers in Patients from the Volga-Ural Region of Eurasian Continent
Source: MDPI journal article supplement (doi:10.3390/ijms24086909), 2023-04-07
Supplement: s1 [file s1]

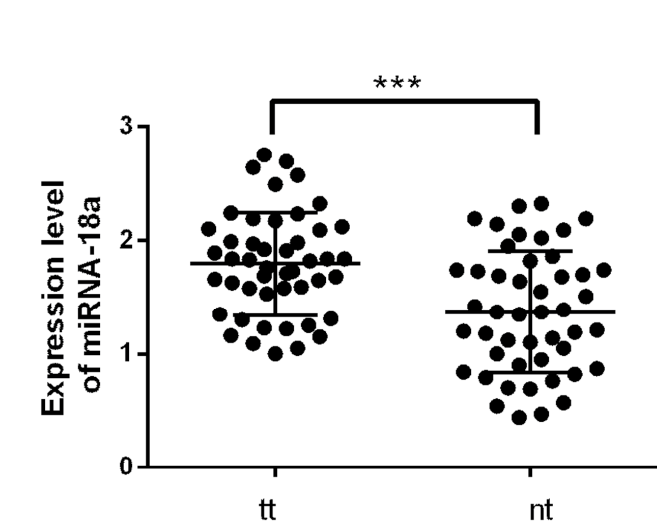

a

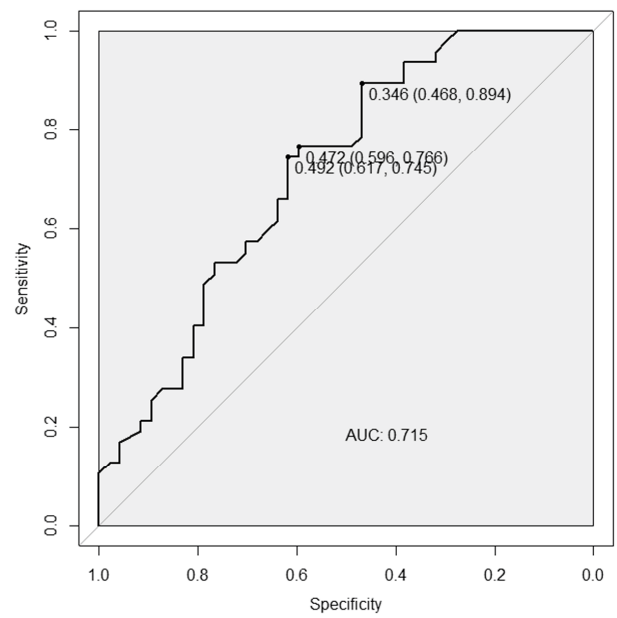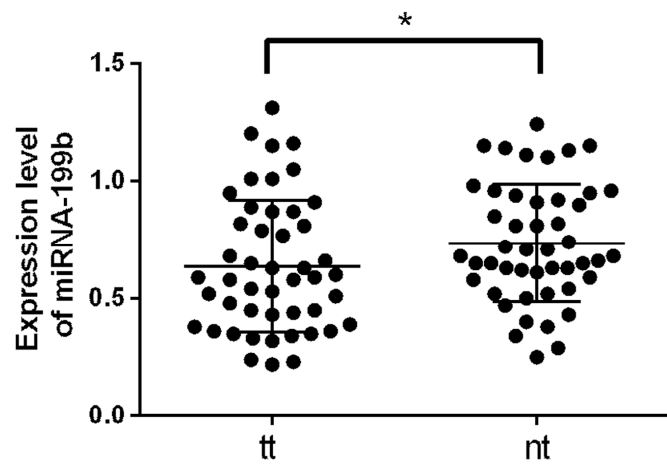

b

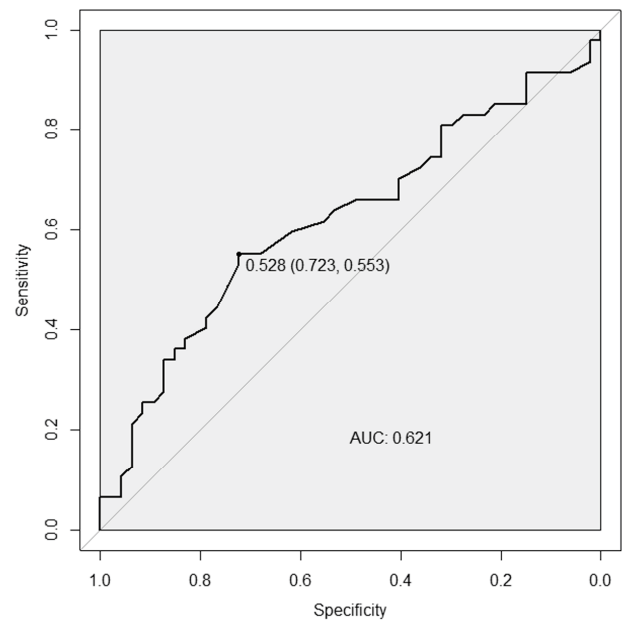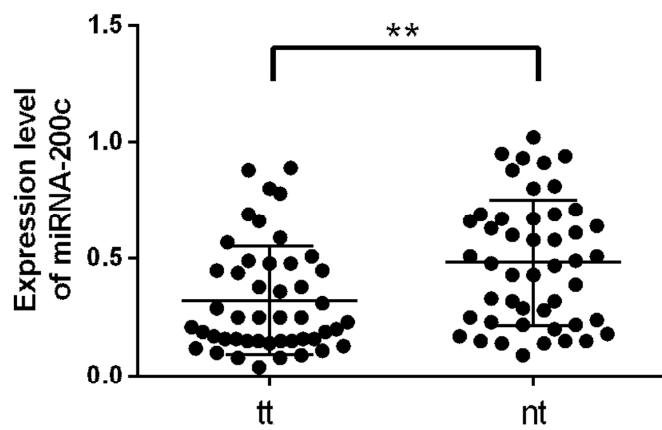

c

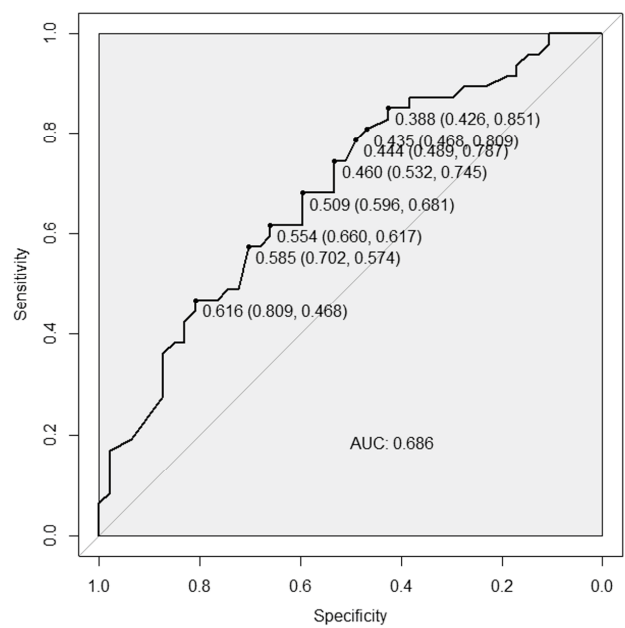

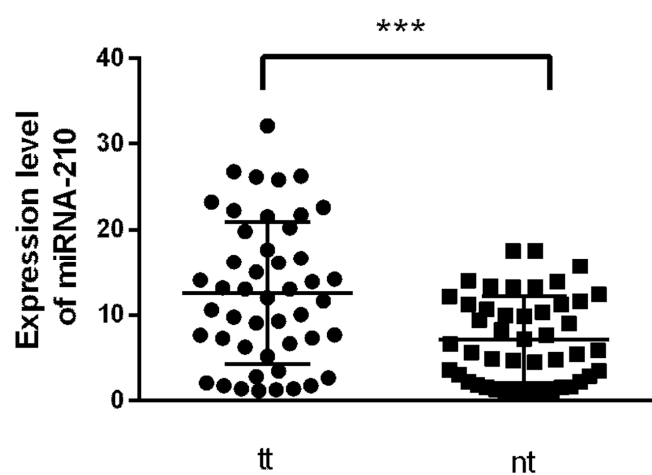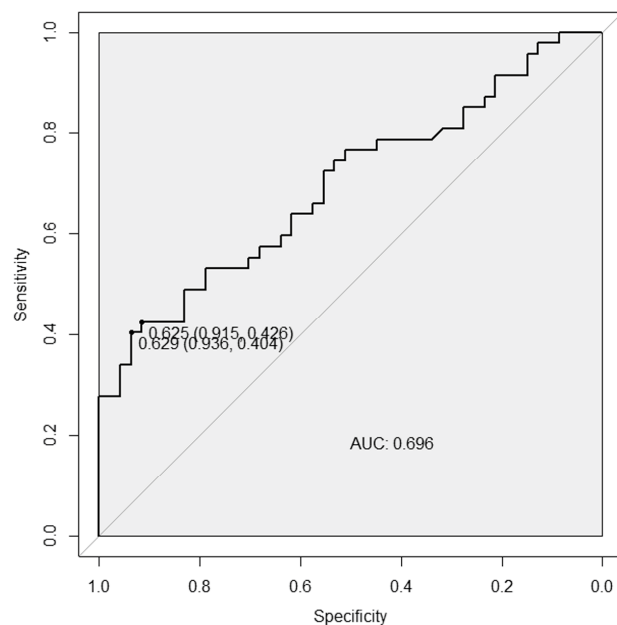

d

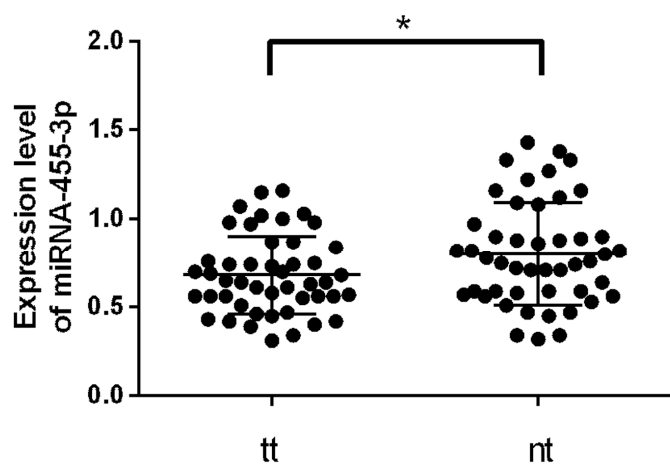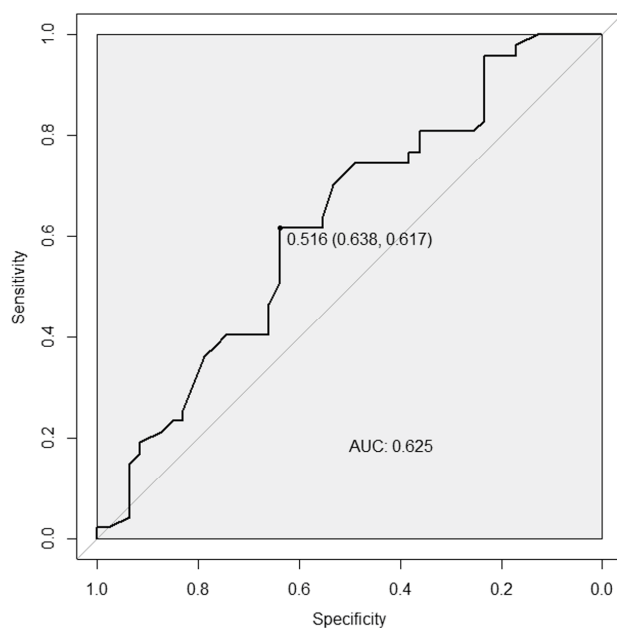

e

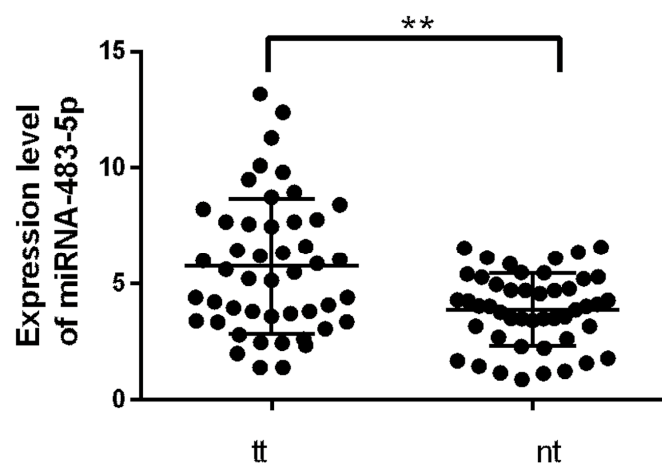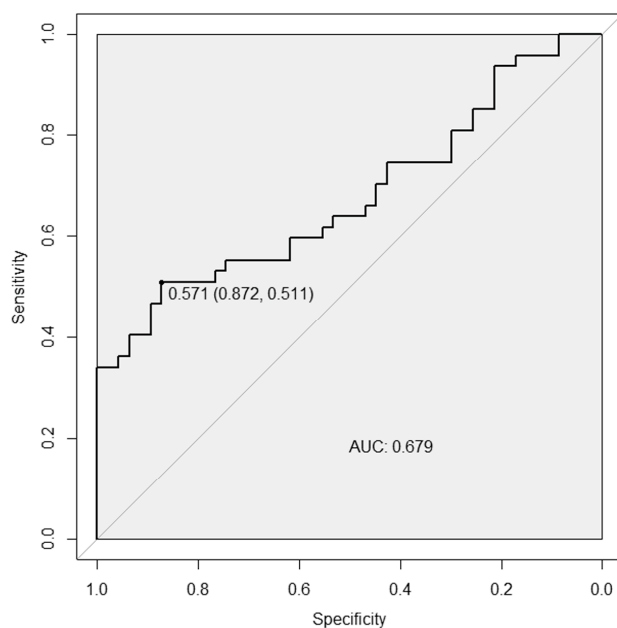

f

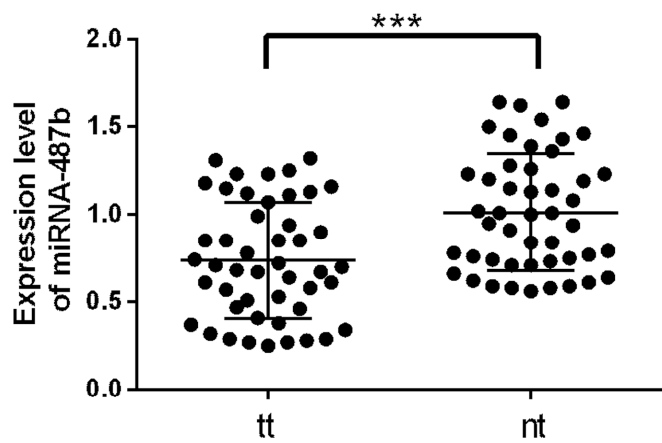

g

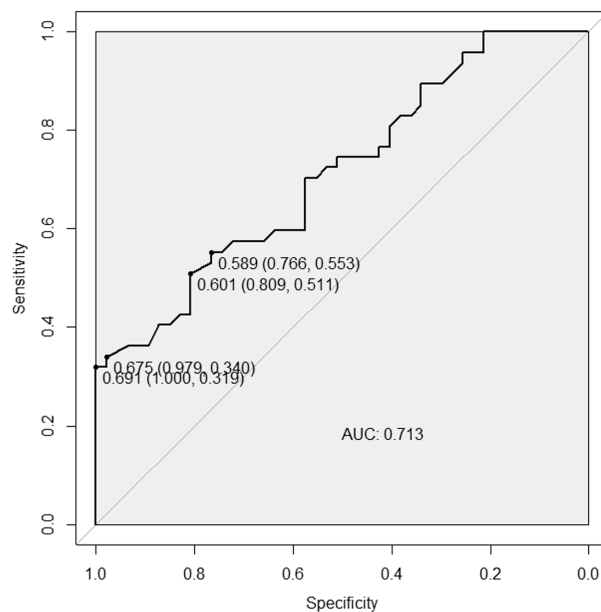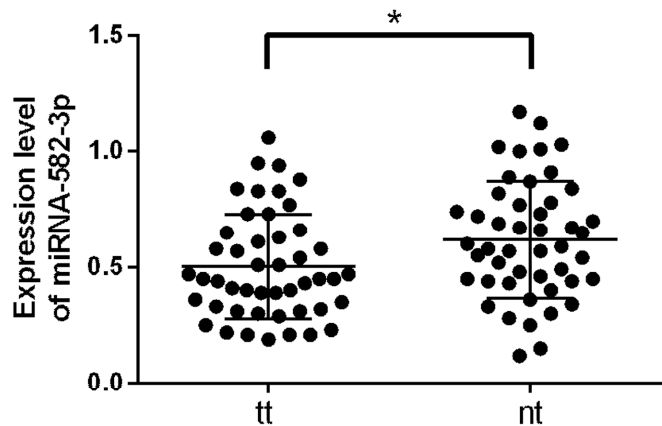

h

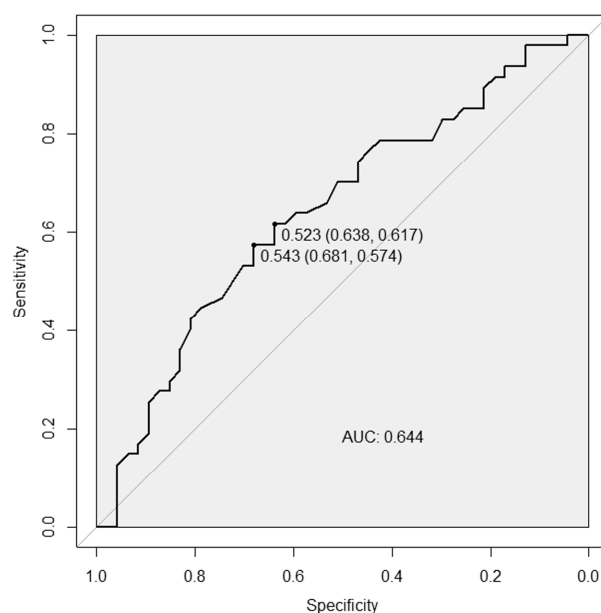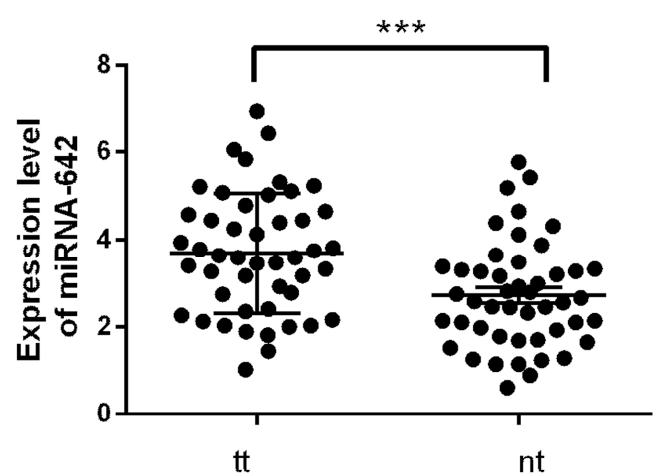

i

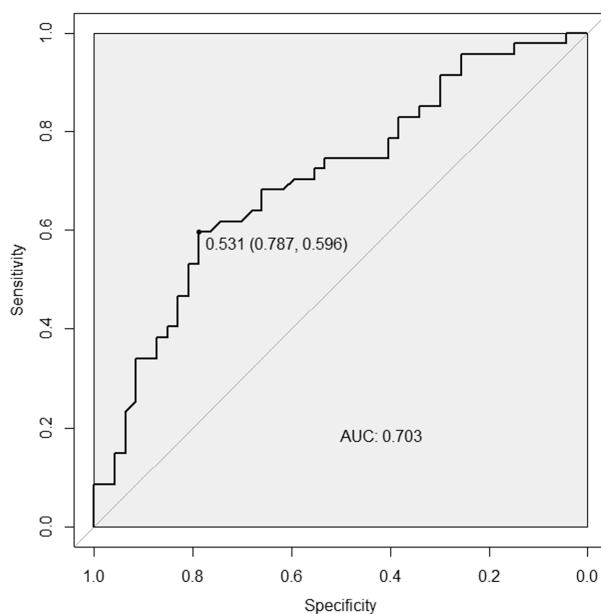

**Figure S1:** MicroRNAs from validation analysis with significant differences. The scatter plots show (a) miRNA-18a, (b) miRNA-199b, (c) miRNA-200c, (d) miRNA-210, (e) miRNA-455-3p, (f) miRNA-483-5p, (g) miRNA-487b, (h) miRNA-582-3p and (i) miRNA-642 expression level analysis performed using Mann–Whitney U test. The line plots present ROC-curve analysis of each miRNAs discrimination power to distinguish tumor and normal tissues. tt—ccRCC tumor tissue; nt—normal renal tissue; AUC—area under the curve;  $p$ -value: \*\*\*— $p < 0.0001$ , \*\*— $p < 0.001$ , \*— $p < 0.01$ .

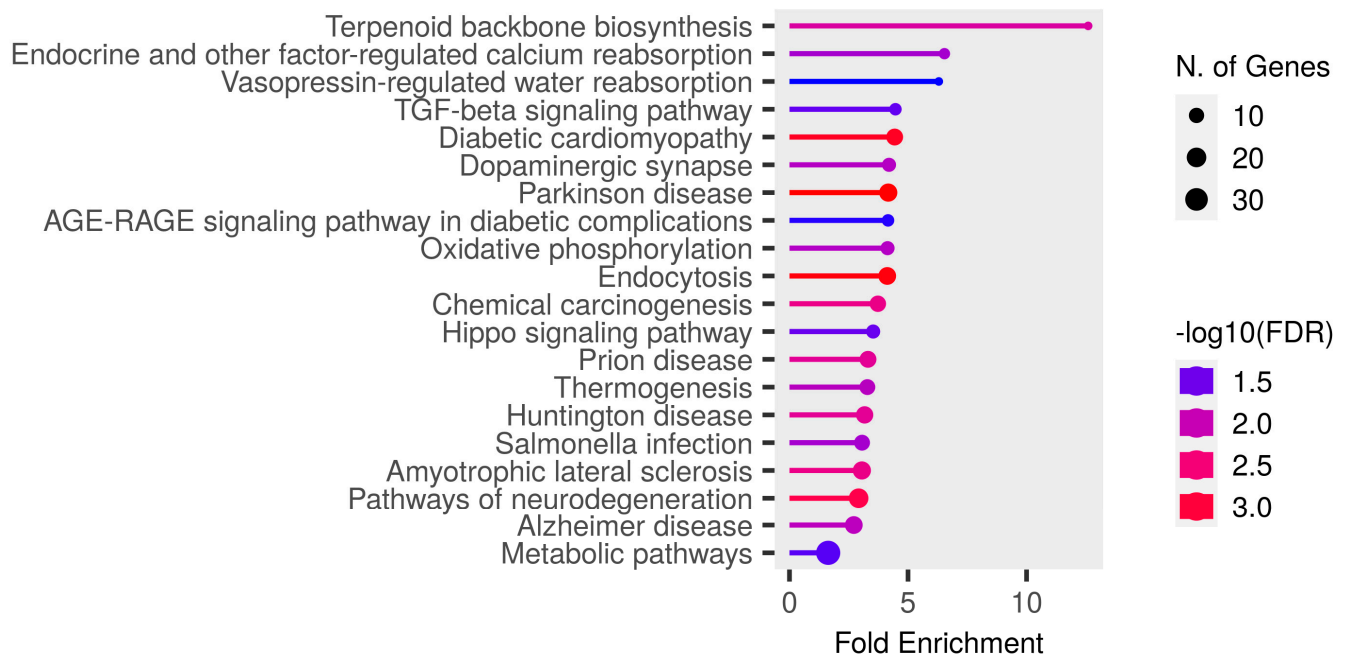

**Figure S2:** The results of enrichment of miRNA-18a targets.

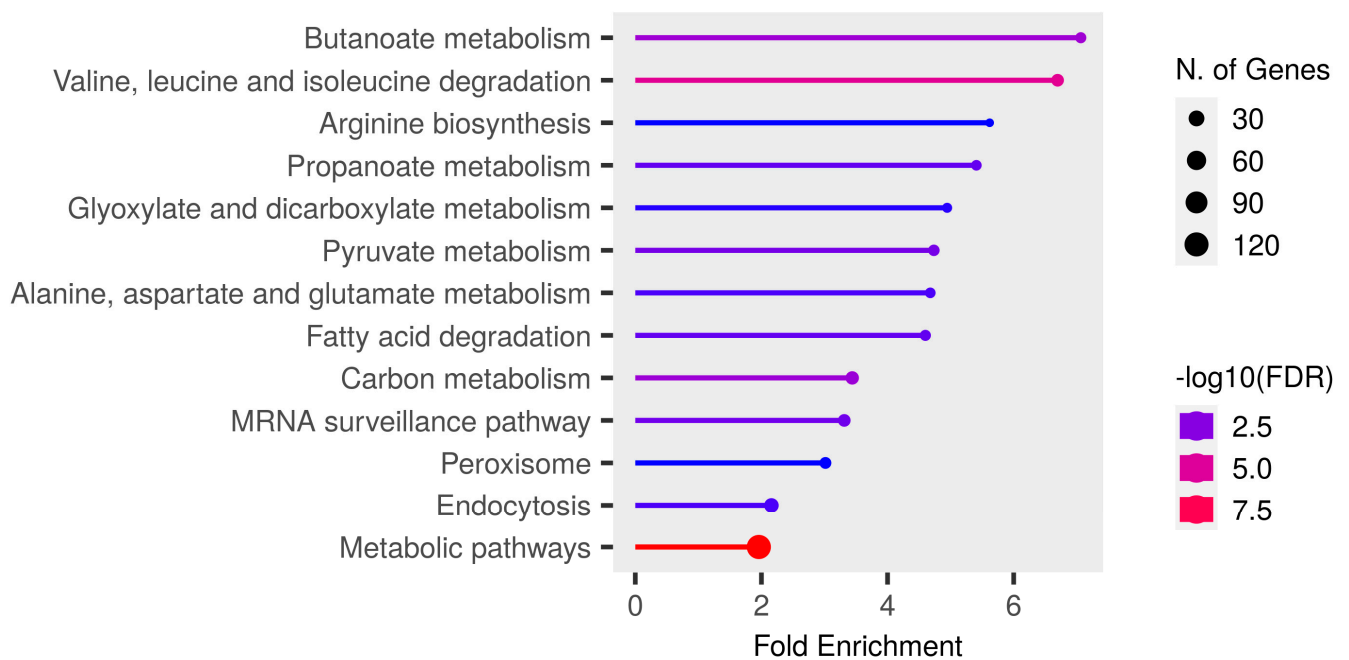

**Figure S3:** The results of enrichment of miRNA-210 targets.

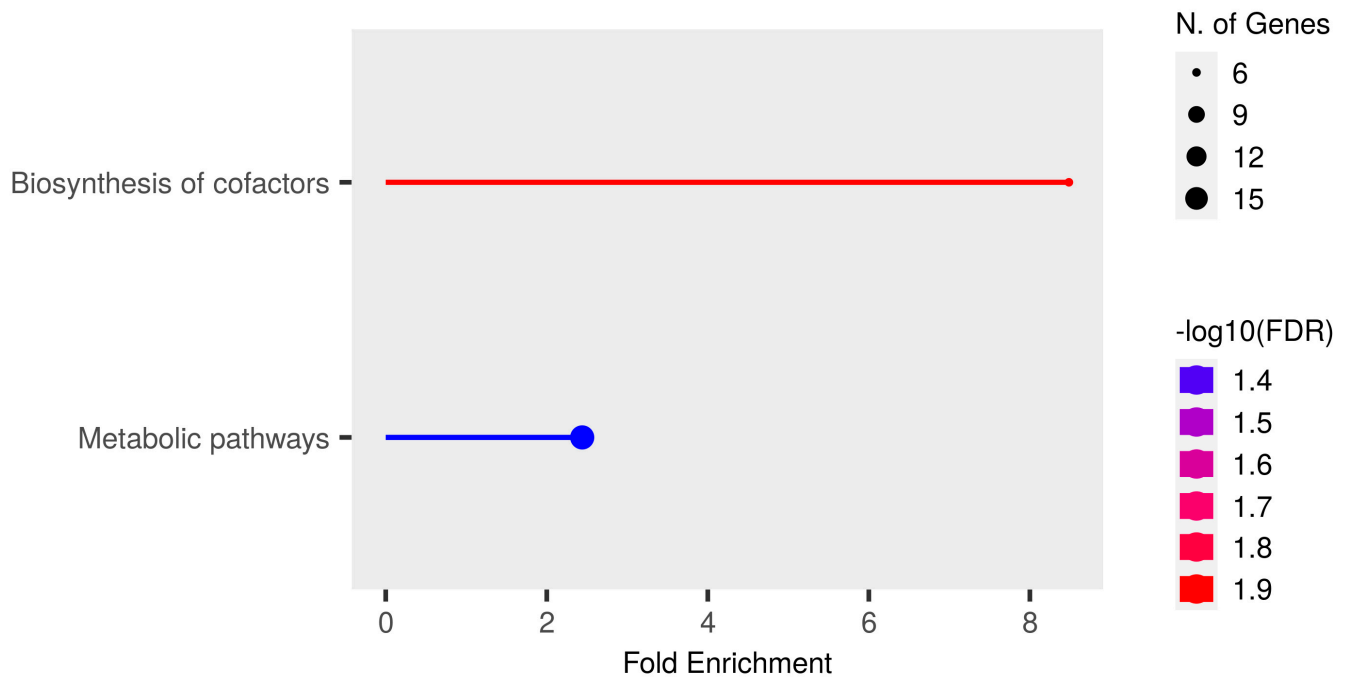

**Figure S4:** The results of enrichment of miRNA-642 targets.

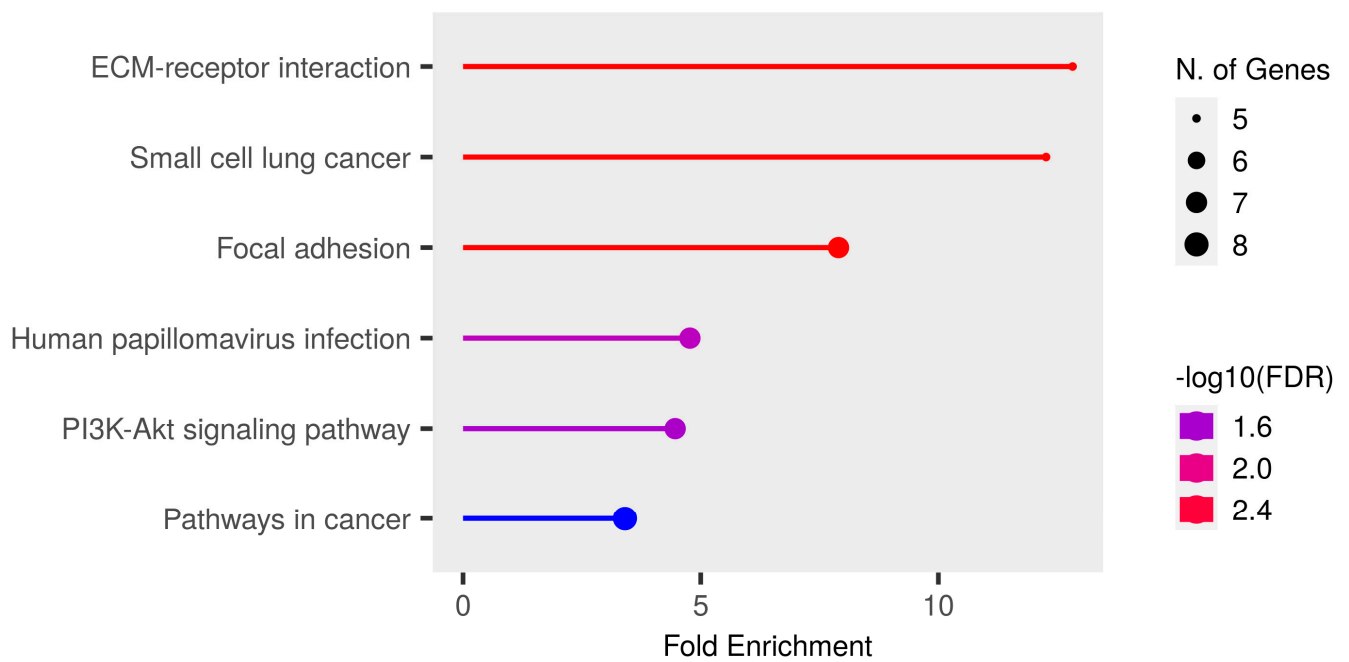

**Figure S5:** The results of enrichment of miRNA-199b targets.

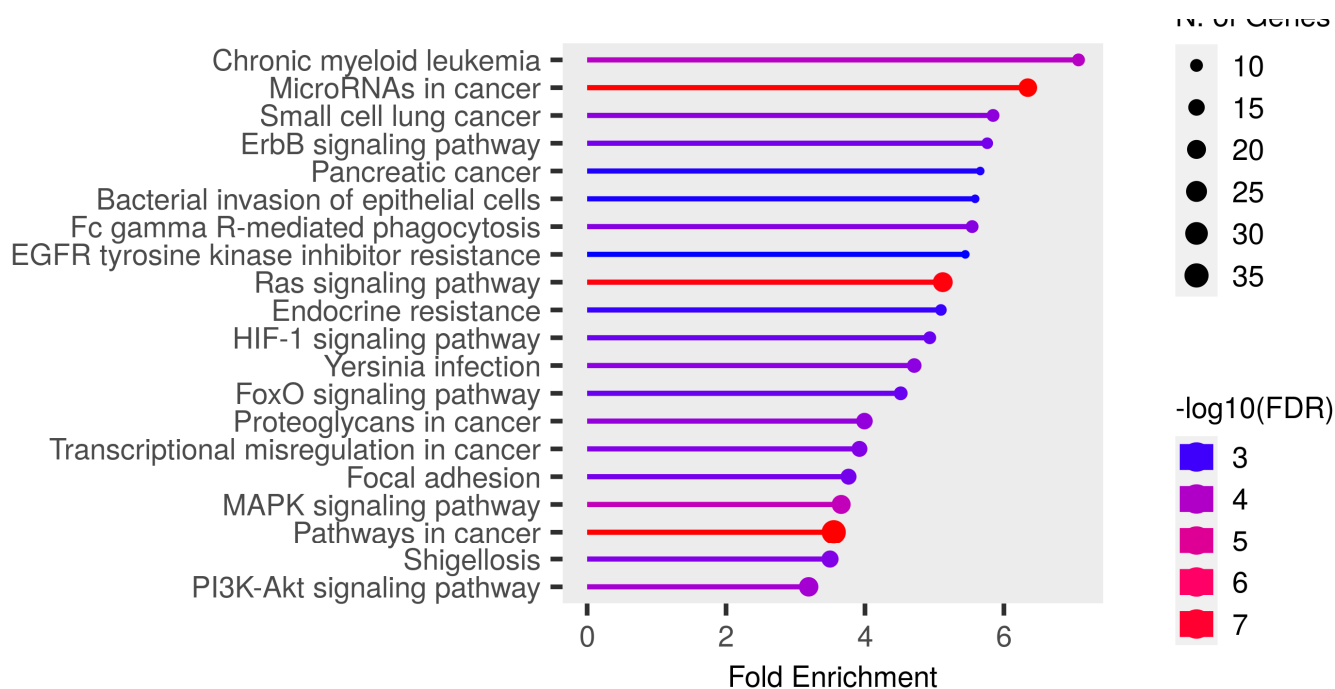

**Figure S6:** The results of enrichment of miRNA-200c targets.

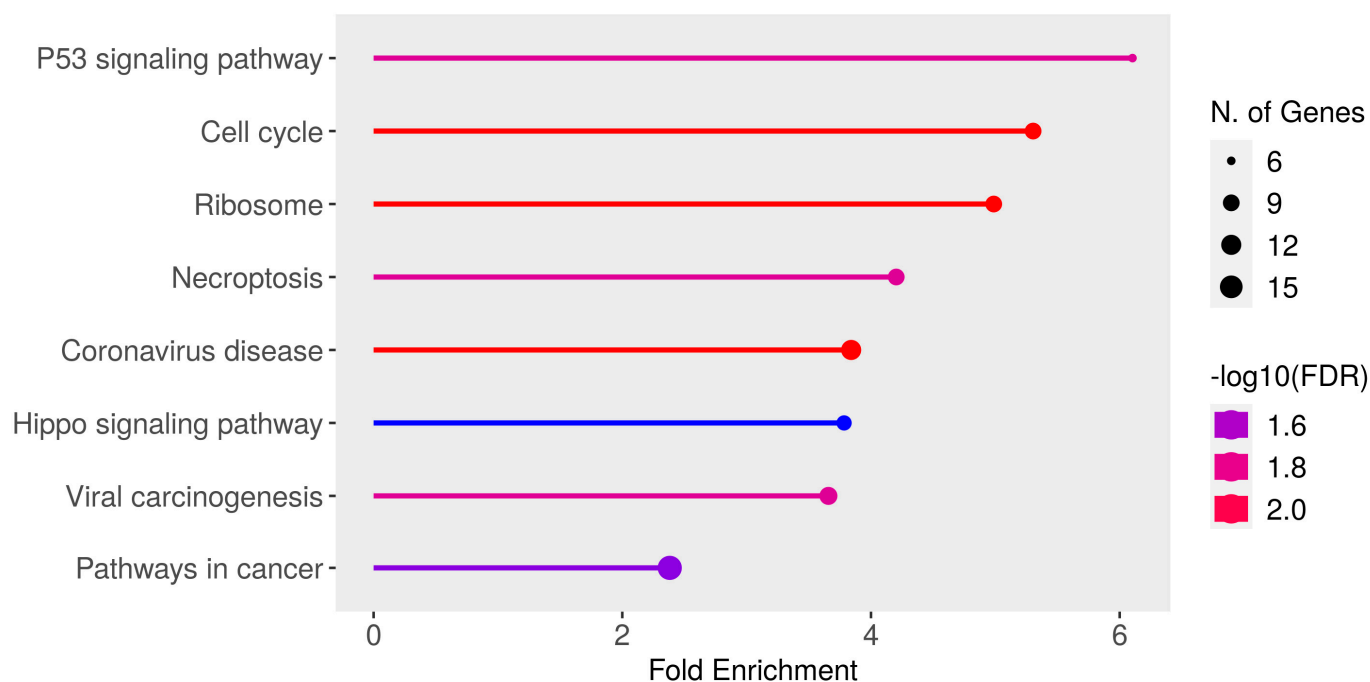

**Figure S7:** The results of enrichment of miRNA-455 targets.

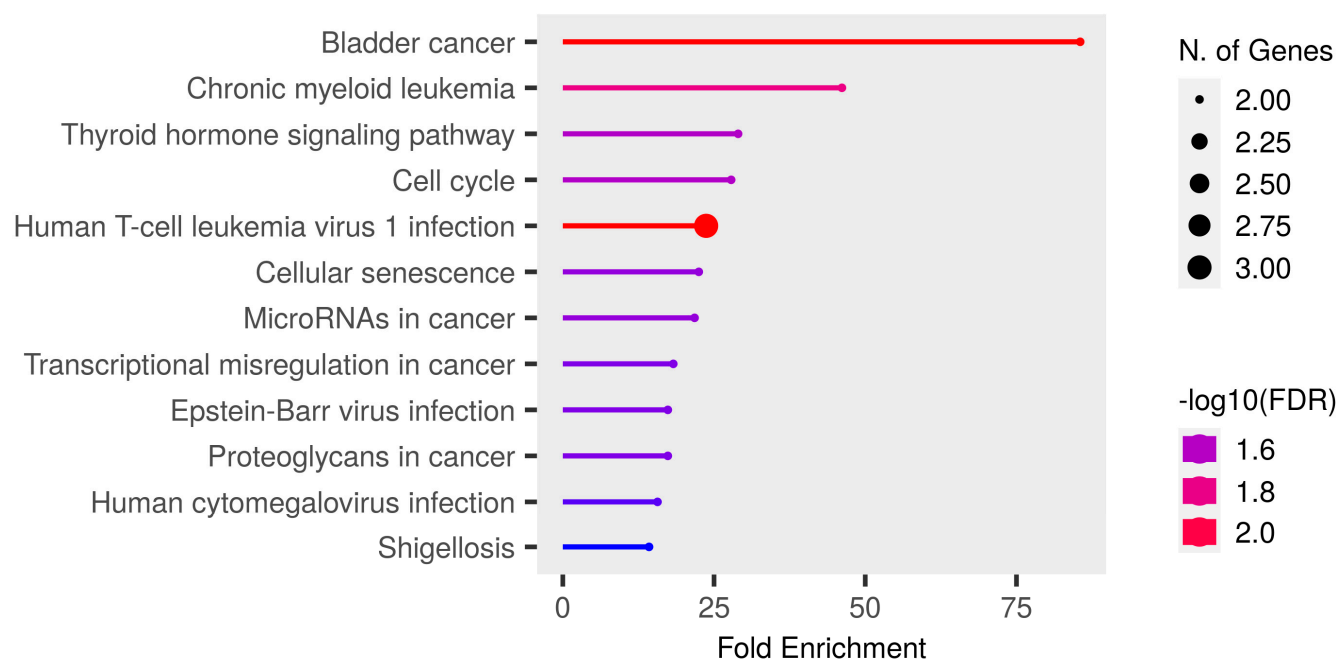

**Figure S8:** The results of enrichment of miRNA-487-3p targets.

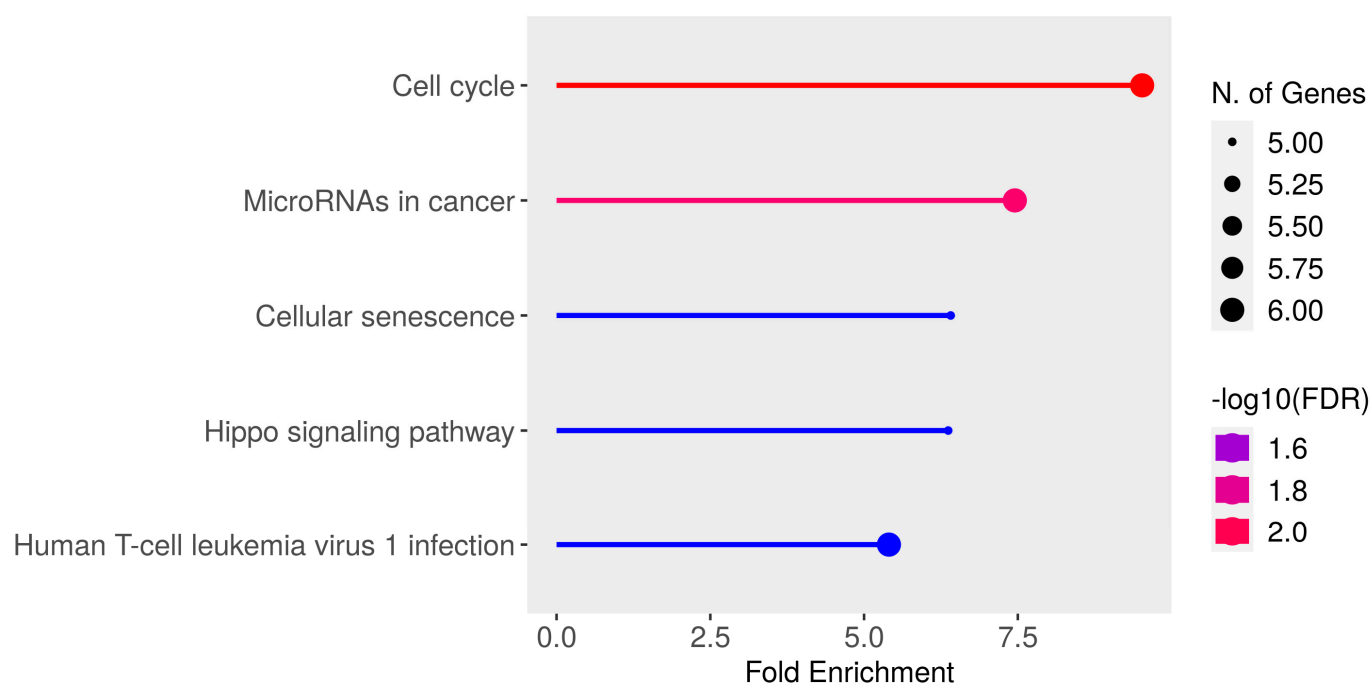

**Figure S9:** The results of enrichment of miRNA-582-3p targets
