# Supplementary material for: MicroRNA Expression Signatures in Clear Cell Renal Cell Carcinoma: High-Throughput Searching for Key miRNA Markers in Patients from the Volga-Ural Region of Eurasian Continent
Source: Int J Mol Sci. 2023 Apr 7;24(8):6909. doi: 10.3390/ijms24086909 (PMC10139074; doi:10.3390/ijms24086909)
Supplement: Supplementary file 1 [file ijms-24-06909-s001.zip › Supplementary File S1. Targets of each studied miRNA according to TCGA database analysis.xlsx]

## Sheet: Table 1_miR-582-3p
gene	Gene_id	Description	Biotype	LogFC	LogCPM	QLF_FDR	MW_FDR	Spearman_correlation_coef	Spearman_correlation_FDR
TEX19	ENSG00000182459.5	testis expressed 19	protein_coding	2.44	-3.76	1.20174e-05	0.0229845	0.26	0.021055
EFNA3	ENSG00000143590.14	ephrin A3	protein_coding	2.37	1.14	1.58094e-17	8.42011e-13	0.75	1.63051e-18
CAV1	ENSG00000105974.13	caveolin 1	protein_coding	2.26	7.42	2.04209e-21	1.05572e-13	0.78	5.12065e-21
ARHGEF39	ENSG00000137135.18	Rho guanine nucleotide exchange factor 39	protein_coding	2.07	0.92	1.14886e-23	2.26879e-14	0.81	2.52579e-23
CDT1	ENSG00000167513.9	chromatin licensing and DNA replication factor 1	protein_coding	2.01	1.89	1.17496e-12	3.71772e-12	0.73	5.66054e-17
TREM1	ENSG00000124731.13	triggering receptor expressed on myeloid cells 1	protein_coding	1.97	2.07	1.09074e-07	1.33906e-06	0.51	1.84119e-07
SIRPA	ENSG00000198053.12	signal regulatory protein alpha	protein_coding	1.69	7.41	4.514e-24	6.12994e-14	0.79	9.25075e-22
CCL3	ENSG00000277632.2	C-C motif chemokine ligand 3	protein_coding	1.66	-0.04	8.63808e-08	1.62499e-06	0.51	2.39068e-07
SCN4B	ENSG00000177098.9	sodium voltage-gated channel beta subunit 4	protein_coding	1.64	4.38	1.08533e-12	2.56829e-09	0.62	1.58909e-11
CDH2	ENSG00000170558.10	cadherin 2	protein_coding	1.5	6.35	2.19405e-13	7.77088e-12	0.71	2.93388e-16
ARL4C	ENSG00000188042.8	ADP ribosylation factor like GTPase 4C	protein_coding	1.5	6.11	1.96659e-07	3.10534e-07	0.54	2.43944e-08
PCDHGA1	ENSG00000204956.5	protocadherin gamma subfamily A, 1	protein_coding	1.4	0.75	9.31982e-08	0.000195127	0.4	0.000100559
RCSD1	ENSG00000198771.11	RCSD domain containing 1	protein_coding	1.34	5.14	5.30847e-16	2.48176e-11	0.7	3.34213e-15
MYC	ENSG00000136997.21	MYC proto-oncogene, bHLH transcription factor	protein_coding	1.23	5.75	2.46134e-07	5.8139e-08	0.57	2.14651e-09
OLR1	ENSG00000173391.9	oxidized low density lipoprotein receptor 1	protein_coding	1.16	4.4	0.00176263	0.00135812	0.35	0.000950349
DEGS1	ENSG00000143753.13	delta 4-desaturase, sphingolipid 1	protein_coding	1.12	6.67	8.50399e-18	4.8383e-13	0.76	3.80068e-19
EDIL3	ENSG00000164176.13	EGF like repeats and discoidin domains 3	protein_coding	1.09	6.65	7.1536e-05	0.0019007	0.34	0.00138788
RAP2B	ENSG00000181467.5	RAP2B, member of RAS oncogene family	protein_coding	1.09	5.24	1.53821e-12	2.81202e-11	0.7	4.29924e-15
ARL10	ENSG00000175414.7	ADP ribosylation factor like GTPase 10	protein_coding	1.08	4.01	3.48442e-11	3.48781e-09	0.62	2.63675e-11
TNIP1	ENSG00000145901.16	TNFAIP3 interacting protein 1	protein_coding	1.05	8.4	2.78123e-18	2.41728e-13	0.77	5.82714e-20
AURKA	ENSG00000087586.18	aurora kinase A	protein_coding	1.03	2.44	9.53283e-08	1.05072e-09	0.64	3.50682e-12
MTHFD2	ENSG00000065911.13	methylenetetrahydrofolate dehydrogenase (NADP+ dependent) 2, methenyltetrahydrofolate cyclohydrolase	protein_coding	1	4.14	8.98444e-09	3.78232e-08	0.58	1.12522e-09
CCND2	ENSG00000118971.9	cyclin D2	protein_coding	0.99	5.58	5.48337e-08	7.95744e-07	0.52	9.04516e-08
CCNB1	ENSG00000134057.15	cyclin B1	protein_coding	0.99	3.42	1.81573e-07	7.73062e-09	0.6	9.57092e-11
SLFN5	ENSG00000166750.10	schlafen family member 5	protein_coding	0.94	6.17	5.71601e-08	7.44585e-08	0.56	3.10159e-09
CALU	ENSG00000128595.17	calumenin	protein_coding	0.92	7.49	5.2446e-11	1.81329e-10	0.67	1.53503e-13
MLEC	ENSG00000110917.8	malectin	protein_coding	0.87	8.56	1.07138e-14	1.62772e-12	0.74	8.23059e-18
MCF2L	ENSG00000126217.21	MCF,2 cell line derived transforming sequence like	protein_coding	0.87	5.61	4.43335e-09	4.60057e-06	0.49	9.50726e-07
DYRK2	ENSG00000127334.11	dual specificity tyrosine phosphorylation regulated kinase 2	protein_coding	0.86	5.18	2.16339e-13	5.48142e-11	0.68	1.60289e-14
NME4	ENSG00000103202.13	NME/NM23 nucleoside diphosphate kinase 4	protein_coding	0.85	6.03	3.76251e-08	7.32143e-05	0.42	3.10107e-05
RPL28	ENSG00000108107.15	ribosomal protein L28	protein_coding	0.84	8.55	2.40176e-09	5.71554e-09	0.61	5.89573e-11
LIX1L	ENSG00000271601.4	limb and CNS expressed 1 like	protein_coding	0.84	5.21	3.93418e-17	1.16336e-12	0.74	3.67367e-18
ITPRIP	ENSG00000148841.17	inositol 1,4,5-trisphosphate receptor interacting protein	protein_coding	0.82	6.04	2.10057e-07	3.68684e-07	0.54	3.10516e-08
RPS20	ENSG00000008988.11	ribosomal protein S20	protein_coding	0.82	9.21	1.03021e-09	1.12495e-08	0.6	1.73403e-10
ABL2	ENSG00000143322.21	ABL proto-oncogene 2, non-receptor tyrosine kinase	protein_coding	0.8	5.52	6.57999e-14	1.27707e-11	0.71	8.48292e-16
STOM	ENSG00000148175.13	stomatin	protein_coding	0.79	8.55	4.10129e-13	6.48219e-11	0.68	2.21324e-14
SLC39A1	ENSG00000143570.19	solute carrier family 39 member 1	protein_coding	0.76	-0.75	3.08885e-05	0.000246068	0.4	0.000132244
FNDC3B	ENSG00000075420.13	fibronectin type III domain containing 3B	protein_coding	0.76	7.35	5.75684e-12	1.36073e-10	0.67	9.02425e-14
ZEB2	ENSG00000169554.22	zinc finger E-box binding homeobox 2	protein_coding	0.74	6.55	8.29038e-08	5.03624e-08	0.57	1.7325e-09
GEMIN7	ENSG00000142252.11	gem nuclear organelle associated protein 7	protein_coding	0.73	-1.91	1.17115e-06	3.26629e-06	0.49	6.06328e-07
KCNC1	ENSG00000129159.9	potassium voltage-gated channel subfamily C member 1	protein_coding	0.72	-2.55	0.000852967	0.0058036	0.31	0.00478173
CAPZA1	ENSG00000116489.13	capping actin protein of muscle Z-line subunit alpha 1	protein_coding	0.68	6.84	3.15225e-10	1.09343e-09	0.64	3.75286e-12
DONSON	ENSG00000159147.18	DNA replication fork stabilization factor DONSON	protein_coding	0.67	2.45	1.60855e-06	5.51473e-07	0.53	5.45294e-08
PKD1	ENSG00000008710.20	polycystin 1, transient receptor potential channel interacting	protein_coding	0.66	5.18	7.08711e-06	5.33616e-07	0.53	5.20806e-08
DDX39B	ENSG00000198563.14	DExD-box helicase 39B	protein_coding	0.65	4.79	5.53408e-06	0.000246068	0.4	0.000132244
FEM1C	ENSG00000145780.8	fem-1 homolog C	protein_coding	0.62	5.63	1.53063e-07	2.20757e-07	0.55	1.50186e-08
PABPC4	ENSG00000090621.15	poly(A) binding protein cytoplasmic 4	protein_coding	0.61	6.47	4.32449e-12	5.37227e-10	0.65	1.08917e-12
KATNAL1	ENSG00000102781.14	katanin catalytic subunit A1 like 1	protein_coding	0.61	4.69	6.26483e-10	5.1576e-10	0.65	1.01422e-12
POP7	ENSG00000172336.5	POP7 homolog, ribonuclease P/MRP subunit	protein_coding	0.61	4.13	1.06459e-07	1.05883e-07	0.56	5.20634e-09
FBN1	ENSG00000166147.14	fibrillin 1	protein_coding	0.6	6.68	0.0053995	6.74075e-05	0.43	2.80481e-05
SFT2D2	ENSG00000213064.10	SFT2 domain containing 2	protein_coding	0.6	6.68	3.09046e-11	2.11225e-09	0.63	1.14888e-11
NCLN	ENSG00000125912.11	nicalin	protein_coding	0.59	5.79	2.70693e-07	2.99874e-09	0.62	2.05274e-11
LENG9	ENSG00000275183.2	leukocyte receptor cluster member 9	protein_coding	0.59	1.35	0.000998254	0.00514934	0.31	0.00419366
TRAFD1	ENSG00000135148.12	TRAF-type zinc finger domain containing 1	protein_coding	0.59	5.41	5.03931e-08	1.17581e-06	0.51	1.54349e-07
PCED1A	ENSG00000132635.17	PC-esterase domain containing 1A	protein_coding	0.59	4.89	8.83151e-08	1.02144e-07	0.56	4.94153e-09
LRRC45	ENSG00000169683.8	leucine rich repeat containing 45	protein_coding	0.59	3.51	9.88293e-07	5.89562e-07	0.53	5.98239e-08
WWTR1	ENSG00000018408.15	WW domain containing transcription regulator 1	protein_coding	0.57	7.88	2.18333e-08	5.51473e-07	0.53	5.45294e-08
PPP1CC	ENSG00000186298.12	protein phosphatase 1 catalytic subunit gamma	protein_coding	0.56	6.93	3.35954e-14	8.09793e-13	0.75	1.47319e-18
ITGB1	ENSG00000150093.20	integrin subunit beta 1	protein_coding	0.53	8.81	1.5835e-06	2.2386e-06	0.5	3.67193e-07
EPB41L4A	ENSG00000129595.14	erythrocyte membrane protein band 4,1 like 4A	protein_coding	0.53	4.47	2.38763e-05	0.000233817	0.4	0.000124517
PEAK1	ENSG00000173517.10	pseudopodium enriched atypical kinase 1	protein_coding	0.53	6.13	6.95949e-06	6.20661e-05	0.43	2.53674e-05
FIGN	ENSG00000182263.14	fidgetin, microtubule severing factor	protein_coding	0.52	3.68	0.00297816	0.00514934	0.31	0.00419366
TBL1XR1	ENSG00000177565.18	TBL1X receptor 1	protein_coding	0.52	7.35	1.0033e-07	1.61212e-07	0.55	9.57932e-09
MED13L	ENSG00000123066.9	mediator complex subunit 13L	protein_coding	0.5	6.9	4.86812e-06	3.55013e-05	0.44	1.27728e-05
EEF2	ENSG00000167658.16	eukaryotic translation elongation factor 2	protein_coding	0.5	11.19	3.54426e-06	1.72863e-07	0.55	1.05904e-08
SCLT1	ENSG00000151466.12	sodium channel and clathrin linker 1	protein_coding	0.5	2.8	2.70731e-08	9.3239e-09	0.6	1.28961e-10
JPT2	ENSG00000206053.13	Jupiter microtubule associated homolog 2	protein_coding	0.5	7.07	4.21253e-06	2.31061e-05	0.45	7.48707e-06
NOP56	ENSG00000101361.17	NOP56 ribonucleoprotein	protein_coding	0.49	5.73	4.11198e-10	5.80739e-10	0.65	1.25096e-12
YWHAG	ENSG00000170027.7	tyrosine 3-monooxygenase/tryptophan 5-monooxygenase activation protein gamma	protein_coding	0.48	7.78	1.68002e-08	8.0266e-09	0.6	1.0162e-10
DTX4	ENSG00000110042.8	deltex E3 ubiquitin ligase 4	protein_coding	0.48	5.13	0.0115304	0.0262046	0.25	0.0242183
EEF1D	ENSG00000104529.17	eukaryotic translation elongation factor 1 delta	protein_coding	0.48	5.41	2.83542e-07	1.63136e-08	0.59	3.101e-10
SYVN1	ENSG00000162298.19	synoviolin 1	protein_coding	0.47	6.11	2.47313e-08	2.77535e-09	0.62	1.80661e-11
TRIO	ENSG00000038382.20	trio Rho guanine nucleotide exchange factor	protein_coding	0.46	6.22	8.44775e-07	8.49371e-07	0.52	9.89389e-08
PGRMC1	ENSG00000101856.10	progesterone receptor membrane component 1	protein_coding	0.45	8.18	1.64469e-05	6.04465e-05	0.43	2.45542e-05
FBRS	ENSG00000156860.16	fibrosin	protein_coding	0.45	6.14	6.20048e-08	1.30733e-10	0.67	8.36774e-14
DIXDC1	ENSG00000150764.14	DIX domain containing 1	protein_coding	0.44	5.95	0.000752773	0.0367875	0.24	0.0346337
PES1	ENSG00000100029.18	pescadillo ribosomal biogenesis factor 1	protein_coding	0.43	6.18	1.21611e-07	1.82549e-08	0.59	3.68799e-10
PIEZO1	ENSG00000103335.22	piezo type mechanosensitive ion channel component 1	protein_coding	0.43	6.71	0.00190178	0.00108051	0.36	0.000733276
KAT2A	ENSG00000108773.11	lysine acetyltransferase 2A	protein_coding	0.42	4.48	0.000178247	0.000300962	0.39	0.000167597
EZR	ENSG00000092820.18	ezrin	protein_coding	0.41	9.28	0.000241139	0.0120626	0.28	0.0105789
UBE2J1	ENSG00000198833.7	ubiquitin conjugating enzyme E2 J1	protein_coding	0.41	6.57	2.85583e-06	8.49452e-06	0.47	2.10346e-06
FAM160B1	ENSG00000151553.15	family with sequence similarity 160 member B1	protein_coding	0.4	5.26	6.44734e-06	1.93964e-05	0.45	6.01339e-06
SEC61A1	ENSG00000058262.10	SEC61 translocon subunit alpha 1	protein_coding	0.4	8.26	2.99402e-06	1.82968e-05	0.46	5.58837e-06
PLEKHA1	ENSG00000107679.14	pleckstrin homology domain containing A1	protein_coding	0.4	7.03	0.000334999	0.000316617	0.39	0.000177831
SKAP2	ENSG00000005020.13	src kinase associated phosphoprotein 2	protein_coding	0.39	6.78	2.09165e-06	1.08003e-05	0.47	2.86115e-06
IDS	ENSG00000010404.18	iduronate 2-sulfatase	protein_coding	0.39	3.11	0.00320383	0.000725893	0.37	0.00046544
CAMSAP1	ENSG00000130559.19	calmodulin regulated spectrin associated protein 1	protein_coding	0.39	5.18	1.23338e-05	0.000171328	0.4	8.61801e-05
BACH1	ENSG00000156273.16	BTB domain and CNC homolog 1	protein_coding	0.38	5.96	4.21149e-05	1.77776e-05	0.46	5.38884e-06
GRPEL2	ENSG00000164284.15	GrpE like 2, mitochondrial	protein_coding	0.37	4.39	1.91082e-06	2.71124e-07	0.54	2.01252e-08
BTAF1	ENSG00000095564.14	B-TFIID TATA-box binding protein associated factor 1	protein_coding	0.37	5.13	7.37753e-05	0.000494513	0.38	0.000298851
ESS2	ENSG00000100056.12	ess-2 splicing factor homolog	protein_coding	0.36	4.06	4.31515e-05	4.07892e-07	0.53	3.57855e-08
TTC27	ENSG00000018699.13	tetratricopeptide repeat domain 27	protein_coding	0.35	4.34	3.98549e-08	6.23591e-08	0.57	2.38368e-09
SMURF1	ENSG00000198742.10	SMAD specific E3 ubiquitin protein ligase 1	protein_coding	0.35	5.18	0.00115247	0.00893171	0.29	0.00764634
OGA	ENSG00000198408.14	O-GlcNAcase	protein_coding	0.35	7.53	9.53593e-05	0.000162608	0.41	8.09894e-05
WBP1L	ENSG00000166272.18	WW domain binding protein 1 like	protein_coding	0.34	6.39	5.60739e-06	1.25363e-06	0.51	1.68451e-07
SETD1A	ENSG00000099381.18	SET domain containing 1A, histone lysine methyltransferase	protein_coding	0.33	5.09	0.000305878	2.99332e-05	0.45	1.03388e-05
GAN	ENSG00000261609.8	gigaxonin	protein_coding	0.32	2.96	0.000566521	0.00021096	0.4	0.000110259
E2F3	ENSG00000112242.15	E2F transcription factor 3	protein_coding	0.32	4.18	0.0114509	0.0111865	0.28	0.00975511
TASOR2	ENSG00000108021.20	transcription activation suppressor family member 2	protein_coding	0.29	5.74	0.00106896	0.00118358	0.35	0.000813285
USP15	ENSG00000135655.16	ubiquitin specific peptidase 15	protein_coding	0.28	5.27	0.000323602	4.57543e-05	0.44	1.74637e-05
CCS	ENSG00000173992.9	copper chaperone for superoxide dismutase	protein_coding	0.27	4.88	0.0307441	0.0221138	0.26	0.0202327
BABAM1	ENSG00000105393.16	BRISC and BRCA1 A complex member 1	protein_coding	0.27	3.83	0.00410043	0.0132231	0.28	0.0116782
VEZT	ENSG00000028203.18	vezatin, adherens junctions transmembrane protein	protein_coding	0.26	5.89	0.000370911	7.99323e-06	0.47	1.94538e-06
PTBP1	ENSG00000011304.22	polypyrimidine tract binding protein 1	protein_coding	0.26	7.63	7.06342e-05	9.28366e-06	0.47	2.35853e-06
MAPK9	ENSG00000050748.18	mitogen-activated protein kinase 9	protein_coding	0.25	5.77	8.75644e-05	3.7537e-05	0.44	1.36879e-05
CDK13	ENSG00000065883.16	cyclin dependent kinase 13	protein_coding	0.25	5.82	0.000101836	9.33276e-05	0.42	4.1612e-05
BAZ2A	ENSG00000076108.12	bromodomain adjacent to zinc finger domain 2A	protein_coding	0.24	6.98	0.00556362	0.00445792	0.31	0.00357943
EMC1	ENSG00000127463.15	ER membrane protein complex subunit 1	protein_coding	0.23	6.34	0.00311017	0.00876651	0.29	0.00749281
UBR7	ENSG00000012963.15	ubiquitin protein ligase E3 component n-recognin 7	protein_coding	0.23	5.52	0.00226961	0.0035495	0.32	0.00278362
ZNF207	ENSG00000010244.19	zinc finger protein 207	protein_coding	0.22	6.52	4.13253e-07	6.41662e-09	0.61	7.09316e-11
COPZ1	ENSG00000111481.10	COPI coat complex subunit zeta 1	protein_coding	0.22	7.35	0.00106128	0.00749288	0.3	0.00631942
MYO1C	ENSG00000197879.17	myosin IC	protein_coding	0.21	8.26	0.0405694	0.00927066	0.29	0.00796224
DNAJC9	ENSG00000213551.7	DnaJ heat shock protein family (Hsp40) member C9	protein_coding	0.21	2.47	0.0137847	0.0091051	0.29	0.00780599
CYFIP1	ENSG00000273749.5	cytoplasmic FMR1 interacting protein 1	protein_coding	0.2	7.33	0.0103388	0.0182474	0.27	0.0164886
SKIV2L	ENSG00000204351.12	Ski2 like RNA helicase	protein_coding	0.19	5.48	0.0150584	0.0019007	0.34	0.00138788
CDK12	ENSG00000167258.15	cyclin dependent kinase 12	protein_coding	0.18	5.82	0.00952307	0.00810664	0.3	0.00688384
CSTF1	ENSG00000101138.12	cleavage stimulation factor subunit 1	protein_coding	0.17	5.03	0.00332765	0.000341521	0.39	0.000194282
RNF4	ENSG00000063978.16	ring finger protein 4	protein_coding	0.17	6.15	0.00347496	0.00221834	0.34	0.00165006
DHX33	ENSG00000005100.13	DEAH-box helicase 33	protein_coding	0.17	4.43	0.0108553	0.0034767	0.32	0.00272043
ZNF143	ENSG00000166478.10	zinc finger protein 143	protein_coding	0.16	3.98	0.016215	0.00547015	0.31	0.00448104
BUB3	ENSG00000154473.18	BUB3 mitotic checkpoint protein	protein_coding	0.14	5.97	0.0271081	0.00525215	0.31	0.00428602
NCOA5	ENSG00000124160.12	nuclear receptor coactivator 5	protein_coding	0.14	5.37	0.0289294	0.0103768	0.29	0.00899337
CTCF	ENSG00000102974.16	CCCTC-binding factor	protein_coding	-0.12	6.14	0.047263	0.0472511	-0.23	0.0450523
EWSR1	ENSG00000182944.18	EWS RNA binding protein 1	protein_coding	-0.13	7.33	0.0299643	0.0105719	-0.29	0.00917629
KRR1	ENSG00000111615.14	KRR1 small subunit processome component homolog	protein_coding	-0.16	5.02	0.028937	0.000252335	-0.39	0.000136228
ITCH	ENSG00000078747.16	itchy E3 ubiquitin protein ligase	protein_coding	-0.17	6.3	0.0327231	0.00464882	-0.31	0.00374807
SELENOT	ENSG00000198843.13	selenoprotein T	protein_coding	-0.19	6.84	0.0226309	0.0164423	-0.27	0.0147507
MAP4	ENSG00000047849.21	microtubule associated protein 4	protein_coding	-0.2	8.43	0.00548353	0.000876678	-0.36	0.000577762
EMC10	ENSG00000161671.17	ER membrane protein complex subunit 10	protein_coding	-0.2	6.83	0.0461409	0.034521	-0.24	0.0324007
ATRX	ENSG00000085224.23	ATRX chromatin remodeler	protein_coding	-0.21	6.82	0.0348703	0.00944895	-0.29	0.00812816
ZNF621	ENSG00000172888.12	zinc finger protein 621	protein_coding	-0.21	4.63	0.0247174	0.00484112	-0.31	0.00391873
DISP1	ENSG00000154309.9	dispatched RND transporter family member 1	protein_coding	-0.22	4.94	0.0108768	0.000544786	-0.37	0.000334371
ETF1	ENSG00000120705.13	eukaryotic translation termination factor 1	protein_coding	-0.22	7.02	0.00608534	0.0164423	-0.27	0.0147507
TADA1	ENSG00000152382.6	transcriptional adaptor 1	protein_coding	-0.23	3.8	0.00146988	0.000246068	-0.4	0.000132244
ELOA	ENSG00000011007.12	elongin A	protein_coding	-0.23	5.5	0.000169668	8.38665e-05	-0.42	3.65629e-05
CHM	ENSG00000188419.14	CHM Rab escort protein	protein_coding	-0.24	5.42	0.00625596	0.00252858	-0.33	0.00190975
PPP1CB	ENSG00000213639.10	protein phosphatase 1 catalytic subunit beta	protein_coding	-0.24	8.13	0.0179829	0.0248913	-0.26	0.02294
GTF2A1	ENSG00000165417.12	general transcription factor IIA subunit 1	protein_coding	-0.25	5.92	0.0100219	0.00105552	-0.36	0.000713996
ANKFY1	ENSG00000185722.18	ankyrin repeat and FYVE domain containing 1	protein_coding	-0.25	6.19	0.00919102	0.00312955	-0.33	0.00241856
GOLPH3	ENSG00000113384.14	golgi phosphoprotein 3	protein_coding	-0.25	6.86	9.72358e-06	8.22696e-07	-0.52	9.46744e-08
RMND5A	ENSG00000153561.13	required for meiotic nuclear division 5 homolog A	protein_coding	-0.25	6.48	0.00725699	0.00185879	-0.34	0.00135367
CYB5B	ENSG00000103018.17	cytochrome b5 type B	protein_coding	-0.25	6.47	0.00135132	0.00275677	-0.33	0.00210248
TSN	ENSG00000211460.12	translin	protein_coding	-0.26	6.46	1.36734e-05	2.54089e-06	-0.5	4.34627e-07
SLBP	ENSG00000163950.13	stem-loop binding protein	protein_coding	-0.26	5.24	0.000410523	0.000367946	-0.38	0.000211973
ASH1L	ENSG00000116539.14	ASH1 like histone lysine methyltransferase	protein_coding	-0.26	6.72	0.0163558	0.0213529	-0.26	0.0194942
TIMM21	ENSG00000075336.12	translocase of inner mitochondrial membrane 21	protein_coding	-0.27	4.49	0.000304935	0.000106809	-0.42	4.89549e-05
SNX2	ENSG00000205302.7	sorting nexin 2	protein_coding	-0.28	6.96	0.00338725	0.000614104	-0.37	0.000383965
TM9SF3	ENSG00000077147.16	transmembrane 9 superfamily member 3	protein_coding	-0.28	8.09	0.00083418	1.79059e-06	-0.5	2.7234e-07
MYL12B	ENSG00000118680.14	myosin light chain 12B	protein_coding	-0.29	8.62	0.000139937	9.84735e-05	-0.42	4.43995e-05
IPO8	ENSG00000133704.10	importin 8	protein_coding	-0.29	6.41	1.20361e-05	2.46227e-06	-0.5	4.16807e-07
DHDDS	ENSG00000117682.17	dehydrodolichyl diphosphate synthase subunit	protein_coding	-0.29	5.57	0.00104465	7.75299e-06	-0.47	1.87055e-06
NDUFA8	ENSG00000119421.7	NADH:ubiquinone oxidoreductase subunit A8	protein_coding	-0.29	5.53	0.00570102	0.000599783	-0.37	0.00037366
KIF5B	ENSG00000170759.11	kinesin family member 5B	protein_coding	-0.3	7.51	0.000216437	2.99332e-05	-0.45	1.03388e-05
NUCKS1	ENSG00000069275.13	nuclear casein kinase and cyclin dependent kinase substrate 1	protein_coding	-0.3	8.58	2.33974e-05	1.42885e-06	-0.51	2.00995e-07
HECTD4	ENSG00000173064.13	HECT domain E3 ubiquitin protein ligase 4	protein_coding	-0.3	5.96	0.00439763	0.00514934	-0.31	0.00419366
GTPBP10	ENSG00000105793.16	GTP binding protein 10	protein_coding	-0.3	4.41	0.000159689	4.861e-08	-0.57	1.64259e-09
SELENOI	ENSG00000138018.18	selenoprotein I	protein_coding	-0.32	5.54	0.000390922	9.08877e-05	-0.42	4.0295e-05
CSTF2T	ENSG00000177613.9	cleavage stimulation factor subunit 2 tau variant	protein_coding	-0.32	5.62	3.88158e-05	8.61406e-05	-0.42	3.77653e-05
CPNE3	ENSG00000085719.13	copine 3	protein_coding	-0.33	7.43	2.86669e-05	8.77879e-07	-0.52	1.03527e-07
PTCD3	ENSG00000132300.19	pentatricopeptide repeat domain 3	protein_coding	-0.33	5.8	4.43749e-07	3.46075e-10	-0.66	4.97805e-13
NCOA2	ENSG00000140396.13	nuclear receptor coactivator 2	protein_coding	-0.34	6.44	0.000873653	0.000239913	-0.4	0.000128331
FLNB	ENSG00000136068.15	filamin B	protein_coding	-0.34	8.69	0.0494422	0.000118716	-0.41	5.55887e-05
SRSF6	ENSG00000124193.16	serine and arginine rich splicing factor 6	protein_coding	-0.34	6.49	2.31752e-05	4.32627e-06	-0.49	8.77142e-07
CBX6	ENSG00000183741.12	chromobox 6	protein_coding	-0.34	6.78	0.00599493	0.000448157	-0.38	0.000266668
TMEM106B	ENSG00000106460.19	transmembrane protein 106B	protein_coding	-0.34	7.03	0.00138365	6.23591e-08	-0.57	2.38368e-09
SPRYD3	ENSG00000167778.9	SPRY domain containing 3	protein_coding	-0.34	6.29	4.2443e-05	6.45397e-06	-0.48	1.47648e-06
PIK3C2A	ENSG00000011405.13	phosphatidylinositol-4-phosphate 3-kinase catalytic subunit type 2 alpha	protein_coding	-0.35	6.86	0.000586581	3.26291e-05	-0.44	1.15047e-05
XPO7	ENSG00000130227.17	exportin 7	protein_coding	-0.36	6.62	3.12878e-07	1.62499e-06	-0.51	2.39068e-07
GLCE	ENSG00000138604.10	glucuronic acid epimerase	protein_coding	-0.37	5.57	0.00129689	0.000572155	-0.37	0.000353814
CALM1	ENSG00000198668.13	calmodulin 1	protein_coding	-0.38	8.83	1.07716e-05	3.58593e-06	-0.49	6.85817e-07
PPP3CB	ENSG00000107758.16	protein phosphatase 3 catalytic subunit beta	protein_coding	-0.38	5.73	3.71997e-07	1.15354e-10	-0.67	6.63113e-14
B4GALT1	ENSG00000086062.13	beta-1,4-galactosyltransferase 1	protein_coding	-0.4	7.82	0.00061228	8.1643e-05	-0.42	3.53908e-05
EXTL2	ENSG00000162694.14	exostosin like glycosyltransferase 2	protein_coding	-0.4	4.27	1.41968e-05	9.07312e-07	-0.52	1.08306e-07
FZD6	ENSG00000164930.12	frizzled class receptor 6	protein_coding	-0.41	5.73	0.000514616	0.000195127	-0.4	0.000100559
ZBTB8A	ENSG00000160062.15	zinc finger and BTB domain containing 8A	protein_coding	-0.42	2.53	0.000765672	0.000386913	-0.38	0.000224728
ENTPD4	ENSG00000197217.13	ectonucleoside triphosphate diphosphohydrolase 4	protein_coding	-0.43	5.2	9.90878e-06	6.02171e-08	-0.57	2.26242e-09
SEC22C	ENSG00000093183.14	SEC22 homolog C, vesicle trafficking protein	protein_coding	-0.46	5.44	1.91378e-11	5.94928e-11	-0.68	1.8805e-14
ZBTB4	ENSG00000174282.12	zinc finger and BTB domain containing 4	protein_coding	-0.46	7.39	2.04824e-07	1.02144e-07	-0.56	4.94153e-09
ZNF680	ENSG00000173041.12	zinc finger protein 680	protein_coding	-0.46	3.73	3.65108e-05	5.03624e-08	-0.57	1.7325e-09
PSKH1	ENSG00000159792.10	protein serine kinase H1	protein_coding	-0.48	5.37	9.33526e-06	1.17581e-06	-0.51	1.54349e-07
TRAF4	ENSG00000076604.15	TNF receptor associated factor 4	protein_coding	-0.48	4.99	3.21301e-05	4.46295e-06	-0.49	9.13549e-07
NFS1	ENSG00000244005.13	NFS1 cysteine desulfurase	protein_coding	-0.49	5	9.68338e-08	3.00347e-07	-0.54	2.32666e-08
ERLIN2	ENSG00000147475.17	ER lipid raft associated 2	protein_coding	-0.49	7.05	2.81946e-08	1.51786e-08	-0.59	2.76886e-10
SNN	ENSG00000184602.6	stannin	protein_coding	-0.5	5.49	7.31077e-09	2.63535e-08	-0.58	6.48935e-10
FOXO1	ENSG00000150907.10	forkhead box O1	protein_coding	-0.52	5.29	4.76783e-05	5.50048e-09	-0.61	5.54336e-11
RAB11FIP1	ENSG00000156675.16	RAB11 family interacting protein 1	protein_coding	-0.53	5.79	0.00368256	7.07864e-06	-0.48	1.66336e-06
SLC39A9	ENSG00000029364.12	solute carrier family 39 member 9	protein_coding	-0.53	6.91	2.31588e-13	6.10065e-12	-0.72	1.71597e-16
PSME3	ENSG00000131467.11	proteasome activator subunit 3	protein_coding	-0.54	6.67	1.4769e-12	2.93883e-11	-0.69	4.68545e-15
ATP6V0D1	ENSG00000159720.12	ATPase H+ transporting V0 subunit d1	protein_coding	-0.55	6.87	8.12748e-08	2.88389e-09	-0.62	1.92519e-11
UBP1	ENSG00000153560.12	upstream binding protein 1	protein_coding	-0.56	5.74	1.21857e-12	3.77712e-11	-0.69	7.71355e-15
VTI1B	ENSG00000100568.11	vesicle transport through interaction with t-SNAREs 1B	protein_coding	-0.56	5.82	3.5232e-13	1.07818e-11	-0.71	5.95291e-16
PHLPP1	ENSG00000081913.14	PH domain and leucine rich repeat protein phosphatase 1	protein_coding	-0.56	4.3	2.44634e-07	3.15909e-08	-0.58	8.55945e-10
PNMA1	ENSG00000176903.5	PNMA family member 1	protein_coding	-0.57	6.01	1.07664e-09	8.60543e-10	-0.64	2.48957e-12
ALDH9A1	ENSG00000143149.12	aldehyde dehydrogenase 9 family member A1	protein_coding	-0.59	7.18	1.90237e-08	8.88333e-08	-0.56	4.02414e-09
C10orf67	ENSG00000179133.15	chromosome 10 open reading frame 67	protein_coding	-0.6	0.82	0.0199995	0.0189069	-0.27	0.0171229
CLINT1	ENSG00000113282.14	clathrin interactor 1	protein_coding	-0.6	7.33	1.62196e-12	2.13303e-10	-0.66	2.06896e-13
BMF	ENSG00000104081.14	Bcl2 modifying factor	protein_coding	-0.61	4.38	0.00015979	0.000437537	-0.38	0.000259336
SDHC	ENSG00000143252.16	succinate dehydrogenase complex subunit C	protein_coding	-0.64	6.61	3.30361e-11	1.18191e-09	-0.64	4.29089e-12
ZNF518B	ENSG00000178163.8	zinc finger protein 518B	protein_coding	-0.65	4.46	4.52133e-07	4.06447e-08	-0.58	1.2545e-09
ABHD4	ENSG00000100439.10	abhydrolase domain containing 4, N-acyl phospholipase B	protein_coding	-0.66	5.82	6.52957e-11	9.80449e-11	-0.68	4.87282e-14
PARD6B	ENSG00000124171.9	par-6 family cell polarity regulator beta	protein_coding	-0.66	5.8	7.71349e-07	6.69975e-08	-0.57	2.65138e-09
KIAA0895	ENSG00000164542.13	KIAA0895	protein_coding	-0.67	4.27	5.15757e-08	1.38212e-09	-0.63	5.60372e-12
RAB11FIP2	ENSG00000107560.12	RAB11 family interacting protein 2	protein_coding	-0.68	5.47	5.68853e-08	5.80739e-10	-0.65	1.25096e-12
MED21	ENSG00000152944.9	mediator complex subunit 21	protein_coding	-0.76	5.23	2.29264e-15	2.74764e-13	-0.77	8.21787e-20
FBXO21	ENSG00000135108.15	F-box protein 21	protein_coding	-0.8	6.9	1.17912e-09	1.60178e-10	-0.67	1.22243e-13
PAQR3	ENSG00000163291.14	progestin and adipoQ receptor family member 3	protein_coding	-0.81	4.1	2.39285e-11	2.256e-12	-0.73	1.79506e-17
KLHL15	ENSG00000174010.9	kelch like family member 15	protein_coding	-0.83	4.28	6.50037e-13	3.42079e-12	-0.73	4.68622e-17
PAWR	ENSG00000177425.11	pro-apoptotic WT1 regulator	protein_coding	-0.84	6	1.11319e-10	4.03427e-12	-0.73	6.82034e-17
PTBP3	ENSG00000119314.16	polypyrimidine tract binding protein 3	protein_coding	-0.85	7.38	3.72077e-10	7.96582e-10	-0.64	2.17514e-12
GADD45A	ENSG00000116717.13	growth arrest and DNA damage inducible alpha	protein_coding	-0.89	6.18	2.87172e-08	3.68684e-07	-0.54	3.10516e-08
STRBP	ENSG00000165209.19	spermatid perinuclear RNA binding protein	protein_coding	-0.94	4.7	2.21429e-14	4.74798e-12	-0.72	9.86772e-17
TBC1D13	ENSG00000107021.16	TBC1 domain family member 13	protein_coding	-0.98	6.21	8.61209e-15	6.58436e-12	-0.72	2.04481e-16
AXIN2	ENSG00000168646.13	axin 2	protein_coding	-0.99	2	3.7562e-06	6.918e-09	-0.61	8.00305e-11
PRKCA	ENSG00000154229.12	protein kinase C alpha	protein_coding	-0.99	6.18	1.00056e-12	2.58784e-11	-0.7	3.63625e-15
NFAT5	ENSG00000102908.22	nuclear factor of activated T cells 5	protein_coding	-0.99	6.54	5.05229e-10	3.23218e-09	-0.62	2.32567e-11
FHIT	ENSG00000189283.10	fragile histidine triad diadenosine triphosphatase	protein_coding	-1.02	3.75	8.7528e-13	1.15354e-10	-0.67	6.63113e-14
SYNE2	ENSG00000054654.19	spectrin repeat containing nuclear envelope protein 2	protein_coding	-1.04	8.44	3.25428e-10	8.0266e-09	-0.6	1.0162e-10
KLHL21	ENSG00000162413.16	kelch like family member 21	protein_coding	-1.07	6.37	4.93346e-09	9.67763e-07	-0.52	1.18342e-07
ATP6V1A	ENSG00000114573.10	ATPase H+ transporting V1 subunit A	protein_coding	-1.16	8.07	9.69122e-12	3.14529e-14	-0.8	9.28945e-23
KIAA1522	ENSG00000162522.11	KIAA1522	protein_coding	-1.24	6.9	6.32464e-16	7.75912e-13	-0.75	1.32569e-18
RAC3	ENSG00000169750.9	Rac family small GTPase 3	protein_coding	-1.3	1.68	3.17361e-09	1.81329e-10	-0.67	1.53503e-13
TGFBR3	ENSG00000069702.11	transforming growth factor beta receptor 3	protein_coding	-1.39	6.57	2.82922e-15	6.3537e-12	-0.72	1.87807e-16
PPL	ENSG00000118898.16	periplakin	protein_coding	-1.41	6.37	1.20833e-08	5.89562e-07	-0.53	5.98239e-08
FAM102A	ENSG00000167106.12	family with sequence similarity 102 member A	protein_coding	-1.45	6.48	4.35516e-14	8.76047e-13	-0.75	1.80521e-18
CLMN	ENSG00000165959.12	calmin	protein_coding	-1.57	6.66	1.77155e-19	1.30797e-14	-0.82	2.18754e-24
MPP2	ENSG00000108852.15	membrane palmitoylated protein 2	protein_coding	-1.69	2.14	2.35054e-08	2.28642e-11	-0.7	2.82658e-15
KLF5	ENSG00000102554.14	Kruppel like factor 5	protein_coding	-1.74	4.74	1.3164e-14	5.39493e-12	-0.72	1.30575e-16
PPM1H	ENSG00000111110.12	protein phosphatase, Mg2+/Mn2+ dependent 1H	protein_coding	-1.82	5.46	1.90074e-14	1.90124e-13	-0.77	2.9485e-20
H1-0	ENSG00000189060.5	H1,0 linker histone	protein_coding	-2.06	8.11	5.92563e-14	5.94082e-09	-0.61	6.27175e-11
CHAC1	ENSG00000128965.13	ChaC glutathione specific gamma-glutamylcyclotransferase 1	protein_coding	-2.2	2.43	3.72799e-13	3.77712e-11	-0.69	7.71355e-15
ASS1	ENSG00000130707.18	argininosuccinate synthase 1	protein_coding	-2.62	9.14	1.06019e-12	1.52346e-06	-0.51	2.19197e-07
ALX1	ENSG00000180318.4	ALX homeobox 1	protein_coding	-3.24	0.44	1.32684e-09	1.99938e-12	-0.74	1.33852e-17
ESRP1	ENSG00000104413.18	epithelial splicing regulatory protein 1	protein_coding	-3.77	4.33	2.38874e-10	7.87183e-15	-0.83	1.43061e-25
SFRP1	ENSG00000104332.12	secreted frizzled related protein 1	protein_coding	-3.89	7.97	7.69344e-12	3.39006e-14	-0.8	1.20948e-22
CEACAM5	ENSG00000105388.16	CEA cell adhesion molecule 5	protein_coding	-5.14	-1.79	3.69533e-11	0.0227519	-0.26	0.0208413

## Sheet: Table 2_miR-487b-3p
gene	Gene_id	Description	Biotype	LogFC	LogCPM	QLF_FDR	MW_FDR	Spearman_correlation_coef	Spearman_correlation_FDR
TTYH3	ENSG00000136295.15	tweety family member 3	protein_coding	1.98	7.61	2.23461e-15	6.59641e-13	0.75	8.74201e-19
MYC	ENSG00000136997.21	MYC proto-oncogene, bHLH transcription factor	protein_coding	1.23	5.75	2.46134e-07	5.8139e-08	0.57	2.14651e-09
NRP1	ENSG00000099250.18	neuropilin 1	protein_coding	1.12	8.45	7.06988e-12	2.71599e-10	0.66	3.21658e-13
FRRS1	ENSG00000156869.14	ferric chelate reductase 1	protein_coding	1.1	3.79	2.88744e-09	1.26166e-07	0.56	6.72142e-09
GALNT2	ENSG00000143641.10	polypeptide N-acetylgalactosaminyltransferase 2	protein_coding	0.75	6.16	3.88997e-07	6.86423e-06	0.48	1.5987e-06
MDM2	ENSG00000135679.25	MDM2 proto-oncogene	protein_coding	0.7	6.17	2.55819e-09	1.27892e-09	0.63	4.90791e-12
SFT2D2	ENSG00000213064.10	SFT2 domain containing 2	protein_coding	0.6	6.68	3.09046e-11	2.11225e-09	0.63	1.14888e-11
EEF1B2	ENSG00000114942.14	eukaryotic translation elongation factor 1 beta 2	protein_coding	0.57	7.91	3.74837e-07	4.98981e-07	0.53	4.74388e-08
RIOK3	ENSG00000101782.15	RIO kinase 3	protein_coding	0.52	6.52	1.89937e-07	5.88534e-06	0.48	1.31028e-06
FOXN2	ENSG00000170802.16	forkhead box N2	protein_coding	0.49	4.7	2.42587e-05	6.45397e-06	0.48	1.47648e-06
UFC1	ENSG00000143222.12	ubiquitin-fold modifier conjugating enzyme 1	protein_coding	0.34	6.35	0.000152809	0.00203115	0.34	0.00149509
TLN1	ENSG00000137076.21	talin 1	protein_coding	0.32	9.17	0.00169545	0.00464882	0.31	0.00374807
EIF1	ENSG00000173812.11	eukaryotic translation initiation factor 1	protein_coding	0.3	9.2	0.000116534	0.000691909	0.37	0.000440523
DCP2	ENSG00000172795.17	decapping mRNA 2	protein_coding	0.24	5.4	0.00716492	0.00148715	0.35	0.00105294
ARPP19	ENSG00000128989.11	cAMP regulated phosphoprotein 19	protein_coding	-0.14	7.73	0.0481442	0.00653172	-0.3	0.00544128
PRELID3B	ENSG00000101166.16	PRELI domain containing 3B	protein_coding	-0.17	5.96	0.0259163	0.000961784	-0.36	0.00064229
NAA60	ENSG00000122390.19	N-alpha-acetyltransferase 60, NatF catalytic subunit	protein_coding	-0.19	6.03	0.0382916	0.00252858	-0.33	0.00190975
SUZ12	ENSG00000178691.11	SUZ12 polycomb repressive complex 2 subunit	protein_coding	-0.22	5.47	0.00971701	1.63065e-05	-0.46	4.83033e-06
EVI5	ENSG00000067208.14	ecotropic viral integration site 5	protein_coding	-0.25	4.5	0.00280291	8.1643e-05	-0.42	3.53908e-05
ARHGAP35	ENSG00000160007.19	Rho GTPase activating protein 35	protein_coding	-0.25	7.24	0.01278	0.0120626	-0.28	0.0105789
CDC42BPB	ENSG00000198752.11	CDC42 binding protein kinase beta	protein_coding	-0.35	7.15	0.00266763	0.000798281	-0.36	0.000519012
PANK3	ENSG00000120137.7	pantothenate kinase 3	protein_coding	-0.37	6.35	4.45238e-05	4.67027e-07	-0.53	4.32402e-08
ZNF664	ENSG00000179195.16	zinc finger protein 664	protein_coding	-0.48	7.32	1.49484e-08	2.19653e-09	-0.63	1.2262e-11
ZNF669	ENSG00000188295.15	zinc finger protein 669	protein_coding	-0.5	2	1.54985e-05	5.20185e-06	-0.48	1.11618e-06
SOBP	ENSG00000112320.12	sine oculis binding protein homolog	protein_coding	-0.78	2.93	0.000726691	4.36803e-07	-0.53	3.93749e-08
CPEB4	ENSG00000113742.14	cytoplasmic polyadenylation element binding protein 4	protein_coding	-0.87	7.07	2.63598e-10	8.27785e-10	-0.64	2.32698e-12
TMEM8B	ENSG00000137103.20	transmembrane protein 8B	protein_coding	-1	5.15	3.35223e-14	3.34133e-13	-0.76	1.42167e-19
GRM3	ENSG00000198822.10	glutamate metabotropic receptor 3	protein_coding	-1.03	-1.67	0.0162252	6.3023e-07	-0.53	6.56136e-08
PFN2	ENSG00000070087.14	profilin 2	protein_coding	-1.28	6.81	2.85758e-11	8.42011e-13	-0.75	1.63051e-18
L2HGDH	ENSG00000087299.12	L-2-hydroxyglutarate dehydrogenase	protein_coding	-1.33	4.49	4.12224e-13	1.44552e-11	-0.71	1.10057e-15
MAGI2	ENSG00000187391.22	membrane associated guanylate kinase, WW and PDZ domain containing 2	protein_coding	-1.57	4.25	3.55289e-21	3.28279e-14	-0.8	1.06589e-22
WNT5A	ENSG00000114251.15	Wnt family member 5A	protein_coding	-1.59	3.94	2.04832e-07	6.04465e-05	-0.43	2.45542e-05
TMEM40	ENSG00000088726.16	transmembrane protein 40	protein_coding	-1.9	-2.21	1.45101e-05	2.62847e-09	-0.62	1.65016e-11

## Sheet: Table 3_miR-455-3p
gene	Gene_id	Description	Biotype	LogFC	LogCPM	QLF_FDR	MW_FDR	Spearman_correlation_coef	Spearman_correlation_FDR
CDKN2A	ENSG00000147889.18	cyclin dependent kinase inhibitor 2A	protein_coding	4.27	1.49	7.39867e-22	7.61042e-15	0.84	6.97757e-26
ADAMTS20	ENSG00000173157.17	ADAM metallopeptidase with thrombospondin type 1 motif 20	protein_coding	3.61	-3.31	1.48365e-10	4.83251e-09	0.61	4.4837e-11
C3	ENSG00000125730.17	complement C3	protein_coding	3.54	10.5	8.40055e-12	1.18826e-13	0.78	7.32344e-21
TMEM91	ENSG00000142046.15	transmembrane protein 91	protein_coding	3.36	3.57	5.20423e-25	6.59641e-13	0.75	8.74201e-19
IGFBP3	ENSG00000146674.15	insulin like growth factor binding protein 3	protein_coding	3.15	10.29	4.59643e-20	1.06747e-12	0.75	2.98817e-18
TP73	ENSG00000078900.15	tumor protein p73	protein_coding	2.95	0.02	6.58376e-16	1.21568e-12	0.74	4.07561e-18
SCD	ENSG00000099194.6	stearoyl-CoA desaturase	protein_coding	2.83	8.1	3.90531e-16	2.74764e-13	0.77	8.21787e-20
ITGAX	ENSG00000140678.17	integrin subunit alpha X	protein_coding	2.78	4.11	1.55252e-16	8.3305e-14	0.79	2.47471e-21
ETV7	ENSG00000010030.14	ETS variant transcription factor 7	protein_coding	2.74	2.72	6.59605e-23	4.6475e-13	0.76	3.41486e-19
SLC10A6	ENSG00000145283.8	solute carrier family 10 member 6	protein_coding	2.71	-0.23	1.87746e-18	1.99938e-12	0.74	1.34483e-17
SLC37A2	ENSG00000134955.12	solute carrier family 37 member 2	protein_coding	2.71	3.75	4.90269e-18	3.91449e-14	0.8	2.02587e-22
CD3G	ENSG00000160654.11	CD3g molecule	protein_coding	2.66	2.42	1.28589e-12	3.77712e-11	0.69	7.71355e-15
LYZ	ENSG00000090382.7	lysozyme	protein_coding	2.64	6.69	1.83346e-13	2.02116e-11	0.7	2.19449e-15
SLFN12L	ENSG00000205045.11	schlafen family member 12 like	protein_coding	2.5	-1.1	5.912e-14	8.09121e-12	0.71	3.20591e-16
GJC1	ENSG00000182963.11	gap junction protein gamma 1	protein_coding	2.49	4.45	1.92184e-26	7.43059e-15	0.84	2.91516e-26
LAX1	ENSG00000122188.13	lymphocyte transmembrane adaptor 1	protein_coding	2.35	1.22	7.00012e-12	9.70157e-10	0.64	3.05941e-12
COL8A1	ENSG00000144810.16	collagen type VIII alpha 1 chain	protein_coding	2.34	6.53	8.53589e-14	6.58436e-12	0.72	2.04481e-16
HAVCR1	ENSG00000113249.13	hepatitis A virus cellular receptor 1	protein_coding	2.33	5.51	1.166e-08	1.18191e-09	0.64	4.29089e-12
CENPA	ENSG00000115163.15	centromere protein A	protein_coding	2.28	-0.08	2.35456e-09	3.71772e-12	0.73	5.66054e-17
LAT2	ENSG00000086730.17	linker for activation of T cells family member 2	protein_coding	2.2	3.61	1.49192e-18	1.05572e-13	0.78	5.12065e-21
LILRA2	ENSG00000239998.6	leukocyte immunoglobulin like receptor A2	protein_coding	2.15	2.06	3.95117e-16	2.16722e-12	0.73	1.63093e-17
VCAM1	ENSG00000162692.12	vascular cell adhesion molecule 1	protein_coding	2.09	8.92	3.53671e-13	1.30733e-10	0.67	8.36774e-14
KCNE3	ENSG00000175538.11	potassium voltage-gated channel subfamily E regulatory subunit 3	protein_coding	2.07	5.22	6.05808e-21	2.33153e-14	0.81	2.86846e-23
NT5DC3	ENSG00000111696.12	5'-nucleotidase domain containing 3	protein_coding	2.05	4.73	3.30301e-17	5.86688e-13	0.76	6.40563e-19
DEPP1	ENSG00000165507.9	DEPP1 autophagy regulator	protein_coding	2.05	7.71	7.56737e-16	1.92094e-12	0.74	1.22105e-17
PFKP	ENSG00000067057.18	phosphofructokinase, platelet	protein_coding	1.96	8.24	9.94047e-20	2.41728e-13	0.77	5.82714e-20
FOXJ3	ENSG00000198815.9	forkhead box J3	protein_coding	1.96	7.13	3.53418e-20	1.4773e-10	0.67	1.05132e-13
MAP7D2	ENSG00000184368.16	MAP7 domain containing 2	protein_coding	1.95	4.34	2.00221e-05	0.000876678	0.36	0.000577762
KIF21B	ENSG00000116852.15	kinesin family member 21B	protein_coding	1.87	2.55	3.02268e-14	4.36804e-12	0.72	8.1916e-17
KCNE4	ENSG00000152049.6	potassium voltage-gated channel subfamily E regulatory subunit 4	protein_coding	1.85	4.49	6.43722e-16	3.14387e-12	0.73	3.87121e-17
PDK1	ENSG00000152256.14	pyruvate dehydrogenase kinase 1	protein_coding	1.83	5.54	1.33489e-21	6.12994e-14	0.79	9.25075e-22
GXYLT2	ENSG00000172986.13	glucoside xylosyltransferase 2	protein_coding	1.83	2.58	1.47378e-08	0.000272152	0.39	0.000148915
NCAPG	ENSG00000109805.10	non-SMC condensin I complex subunit G	protein_coding	1.83	1.44	1.36218e-08	7.75912e-13	0.75	1.32569e-18
SIGLEC14	ENSG00000254415.3	sialic acid binding Ig like lectin 14	protein_coding	1.81	1.71	5.00225e-12	4.95663e-10	0.65	9.45284e-13
CDC45	ENSG00000093009.11	cell division cycle 45	protein_coding	1.79	0.69	1.97965e-08	6.59641e-13	0.75	8.74201e-19
SPARC	ENSG00000113140.11	secreted protein acidic and cysteine rich	protein_coding	1.76	10.73	8.12216e-18	6.79479e-14	0.79	1.32629e-21
TMEM44	ENSG00000145014.18	transmembrane protein 44	protein_coding	1.75	3.92	1.20621e-14	2.48176e-11	0.7	3.34213e-15
DISC1	ENSG00000162946.23	DISC1 scaffold protein	protein_coding	1.73	3.25	4.94269e-22	1.84632e-14	0.81	1.11553e-23
PLK1	ENSG00000166851.15	polo like kinase 1	protein_coding	1.73	1.63	5.40073e-08	2.02116e-11	0.7	2.19449e-15
HECW2	ENSG00000138411.13	HECT, C2 and WW domain containing E3 ubiquitin protein ligase 2	protein_coding	1.65	5.26	5.38115e-10	5.09382e-09	0.61	4.89854e-11
CA6	ENSG00000131686.15	carbonic anhydrase 6	protein_coding	1.64	-4.4	2.10865e-05	0.000889396	0.36	0.000586678
SERPINA1	ENSG00000197249.14	serpin family A member 1	protein_coding	1.63	10.23	9.87971e-09	3.27609e-08	0.58	9.04548e-10
COL4A2	ENSG00000134871.19	collagen type IV alpha 2 chain	protein_coding	1.58	9.8	3.5436e-16	3.14387e-12	0.73	3.87121e-17
OSMR	ENSG00000145623.13	oncostatin M receptor	protein_coding	1.56	7.15	4.17113e-14	2.10578e-11	0.7	2.38721e-15
BRIP1	ENSG00000136492.9	BRCA1 interacting protein C-terminal helicase 1	protein_coding	1.55	1.19	2.12736e-09	1.70019e-12	0.74	9.10683e-18
FUT11	ENSG00000196968.11	fucosyltransferase 11	protein_coding	1.55	5.51	1.29019e-27	1.63131e-14	0.82	6.48431e-24
GM2A	ENSG00000196743.9	GM2 ganglioside activator	protein_coding	1.55	6.67	9.09897e-24	1.98028e-14	0.81	1.47008e-23
SLC24A4	ENSG00000140090.18	solute carrier family 24 member 4	protein_coding	1.55	0.06	1.15924e-16	2.78566e-12	0.73	2.91759e-17
RUNX1	ENSG00000159216.19	RUNX family transcription factor 1	protein_coding	1.55	5.54	1.2175e-08	7.32753e-11	0.68	2.8051e-14
HASPIN	ENSG00000177602.5	histone H3 associated protein kinase	protein_coding	1.54	-0.99	1.09071e-10	1.55761e-12	0.74	7.43313e-18
SLC5A5	ENSG00000105641.4	solute carrier family 5 member 5	protein_coding	1.53	-3.35	2.37935e-06	2.20895e-06	0.5	3.60711e-07
CCR4	ENSG00000183813.7	C-C motif chemokine receptor 4	protein_coding	1.52	1.34	1.00443e-07	6.51853e-07	0.52	6.8732e-08
BTLA	ENSG00000186265.10	B and T lymphocyte associated	protein_coding	1.51	-0.04	6.13581e-07	1.25363e-06	0.51	1.68451e-07
BBC3	ENSG00000105327.18	BCL2 binding component 3	protein_coding	1.5	2.78	2.39246e-15	1.49682e-12	0.74	6.73948e-18
FSTL3	ENSG00000070404.10	follistatin like 3	protein_coding	1.46	6.09	4.21189e-08	9.07312e-07	0.52	1.08306e-07
H2AC11	ENSG00000196787.3	H2A clustered histone 11	protein_coding	1.46	-0.02	7.10408e-06	0.00152114	0.35	0.0010802
GRAMD4	ENSG00000075240.17	GRAM domain containing 4	protein_coding	1.46	5.72	2.0784e-15	3.90986e-10	0.65	6.18621e-13
HSPA6	ENSG00000173110.8	heat shock protein family A (Hsp70) member 6	protein_coding	1.45	1.77	8.20014e-09	1.10707e-10	0.67	6.13815e-14
RAD51	ENSG00000051180.17	RAD51 recombinase	protein_coding	1.43	0.81	5.63709e-13	3.42079e-12	0.73	4.68622e-17
MICB	ENSG00000204516.10	MHC class I polypeptide-related sequence B	protein_coding	1.42	2.29	6.48204e-17	4.74798e-12	0.72	9.86772e-17
SLFN12L	ENSG00000286065.2	schlafen family member 12 like	lncRNA	1.4	-4.23	0.000295997	0.00299743	0.33	0.00230643
SCARF1	ENSG00000074660.16	scavenger receptor class F member 1	protein_coding	1.38	4.47	4.59204e-17	3.2814e-12	0.73	4.26237e-17
ESCO2	ENSG00000171320.15	establishment of sister chromatid cohesion N-acetyltransferase 2	protein_coding	1.36	0.46	6.48025e-06	7.77088e-12	0.71	2.93388e-16
SLC35G2	ENSG00000168917.9	solute carrier family 35 member G2	protein_coding	1.34	3.03	1.71819e-16	7.45034e-12	0.72	2.6797e-16
RPS2	ENSG00000140988.16	ribosomal protein S2	protein_coding	1.32	9.03	4.52912e-16	9.13908e-13	0.75	2.00339e-18
VENTX	ENSG00000151650.8	VENT homeobox	protein_coding	1.29	-0.15	2.64905e-08	7.20577e-07	0.52	7.8908e-08
HSPG2	ENSG00000142798.20	heparan sulfate proteoglycan 2	protein_coding	1.27	9.27	7.37784e-08	2.70575e-06	0.5	4.72516e-07
PEAK3	ENSG00000188305.6	PEAK family member 3	protein_coding	1.26	-0.21	1.16743e-08	7.19119e-08	0.57	2.945e-09
MYC	ENSG00000136997.21	MYC proto-oncogene, bHLH transcription factor	protein_coding	1.23	5.75	2.46134e-07	5.8139e-08	0.57	2.14651e-09
LILRA5	ENSG00000187116.14	leukocyte immunoglobulin like receptor A5	protein_coding	1.22	1.12	3.5657e-07	1.25868e-08	0.6	2.06812e-10
MAPRE2	ENSG00000166974.13	microtubule associated protein RP/EB family member 2	protein_coding	1.2	6.76	4.67979e-20	1.63131e-14	0.82	6.48431e-24
HLA-E	ENSG00000204592.9	major histocompatibility complex, class I, E	protein_coding	1.2	10.19	2.79786e-22	6.35911e-14	0.79	1.04606e-21
DNAJC22	ENSG00000178401.16	DnaJ heat shock protein family (Hsp40) member C22	protein_coding	1.19	5.45	6.87473e-12	9.41594e-11	0.68	4.51066e-14
RASGRP3	ENSG00000152689.18	RAS guanyl releasing protein 3	protein_coding	1.16	5.21	2.4356e-19	4.09435e-13	0.76	2.45721e-19
CHST1	ENSG00000175264.8	carbohydrate sulfotransferase 1	protein_coding	1.16	3.03	8.99433e-06	0.0209802	0.26	0.0191292
SFXN3	ENSG00000107819.13	sideroflexin 3	protein_coding	1.15	5.98	1.35407e-16	2.90259e-12	0.73	3.20937e-17
COL6A3	ENSG00000163359.16	collagen type VI alpha 3 chain	protein_coding	1.14	7.34	0.00042031	3.35542e-05	0.44	1.19115e-05
NRXN3	ENSG00000021645.20	neurexin 3	protein_coding	1.12	2.97	3.46987e-06	5.41246e-05	0.43	2.14529e-05
STX4	ENSG00000103496.15	syntaxin 4	protein_coding	1.11	5.44	7.84162e-19	2.22993e-13	0.77	4.64726e-20
BMP8A	ENSG00000183682.8	bone morphogenetic protein 8a	protein_coding	1.11	1.91	2.04894e-07	0.00110555	0.36	0.000752643
APOBEC3F	ENSG00000128394.17	apolipoprotein B mRNA editing enzyme catalytic subunit 3F	protein_coding	1.1	3.16	3.6821e-17	2.08111e-12	0.74	1.48082e-17
RAP2B	ENSG00000181467.5	RAP2B, member of RAS oncogene family	protein_coding	1.09	5.24	1.53821e-12	2.81202e-11	0.7	4.29924e-15
MXI1	ENSG00000119950.21	MAX interactor 1, dimerization protein	protein_coding	1.07	6.58	8.99771e-16	2.94945e-10	0.66	3.7282e-13
FTH1	ENSG00000167996.16	ferritin heavy chain 1	protein_coding	1.07	6	2.94385e-08	1.89371e-08	0.59	3.9044e-10
CXCL16	ENSG00000161921.17	C-X-C motif chemokine ligand 16	protein_coding	1.06	6.27	4.39835e-11	8.33502e-09	0.6	1.079e-10
AHR	ENSG00000106546.14	aryl hydrocarbon receptor	protein_coding	1.04	5.83	2.86378e-10	8.66623e-11	0.68	3.8551e-14
PLXNA3	ENSG00000130827.6	plexin A3	protein_coding	1.03	4.79	7.2983e-11	1.4187e-10	0.67	9.74713e-14
CCDC127	ENSG00000164366.4	coiled-coil domain containing 127	protein_coding	1.03	5.08	2.09175e-17	9.83797e-14	0.78	4.05925e-21
ADA2	ENSG00000093072.18	adenosine deaminase 2	protein_coding	1.03	6.62	2.84622e-07	4.83833e-05	0.43	1.87023e-05
COL3A1	ENSG00000168542.16	collagen type III alpha 1 chain	protein_coding	1.02	9.01	0.000398127	5.88534e-06	0.48	1.31028e-06
NCAPG2	ENSG00000146918.20	non-SMC condensin II complex subunit G2	protein_coding	1.01	3.93	6.08238e-09	2.21857e-10	0.66	2.22557e-13
PTPN12	ENSG00000127947.16	protein tyrosine phosphatase non-receptor type 12	protein_coding	1.01	6.55	1.72173e-18	2.5245e-13	0.77	6.54156e-20
MTHFD2	ENSG00000065911.13	methylenetetrahydrofolate dehydrogenase (NADP+ dependent) 2, methenyltetrahydrofolate cyclohydrolase	protein_coding	1	4.14	8.98444e-09	3.78232e-08	0.58	1.12522e-09
COL6A1	ENSG00000142156.15	collagen type VI alpha 1 chain	protein_coding	1	7.84	1.14321e-06	1.0166e-05	0.47	2.64871e-06
CCNB1	ENSG00000134057.15	cyclin B1	protein_coding	0.99	3.42	1.81573e-07	7.73062e-09	0.6	9.57092e-11
DTX3L	ENSG00000163840.10	deltex E3 ubiquitin ligase 3L	protein_coding	0.99	6.2	1.57343e-13	1.63562e-11	0.7	1.42475e-15
TPP1	ENSG00000166340.17	tripeptidyl peptidase 1	protein_coding	0.98	8.09	4.71424e-14	8.43639e-12	0.71	3.50723e-16
RNF125	ENSG00000101695.9	ring finger protein 125	protein_coding	0.96	3.28	3.43161e-11	6.41662e-09	0.61	7.09316e-11
HRH4	ENSG00000134489.7	histamine receptor H4	protein_coding	0.96	-3.13	5.52302e-05	2.8267e-05	0.45	9.62317e-06
MAD2L1	ENSG00000164109.14	mitotic arrest deficient 2 like 1	protein_coding	0.96	2.69	2.53394e-09	2.6984e-11	0.7	3.95427e-15
CRLF3	ENSG00000176390.12	cytokine receptor like factor 3	protein_coding	0.95	3.53	3.41149e-16	2.13387e-13	0.77	4.13263e-20
RPL18A	ENSG00000105640.13	ribosomal protein L18a	protein_coding	0.95	7.69	6.25585e-12	4.06717e-10	0.65	6.64088e-13
H2BC5	ENSG00000158373.8	H2B clustered histone 5	protein_coding	0.95	4.8	3.12878e-07	1.21325e-06	0.51	1.61147e-07
STK4	ENSG00000101109.12	serine/threonine kinase 4	protein_coding	0.93	5.62	2.52271e-19	4.43176e-14	0.8	3.01616e-22
MAP1B	ENSG00000131711.15	microtubule associated protein 1B	protein_coding	0.93	6.41	8.9067e-07	2.44609e-07	0.54	1.73878e-08
RESF1	ENSG00000174718.12	retroelement silencing factor 1	protein_coding	0.92	5.68	4.15757e-12	8.95298e-10	0.64	2.66579e-12
INSIG2	ENSG00000125629.15	insulin induced gene 2	protein_coding	0.9	6.03	2.82768e-15	3.2814e-12	0.73	4.26237e-17
CCNF	ENSG00000162063.13	cyclin F	protein_coding	0.9	1.75	4.93249e-08	3.75359e-10	0.65	5.75413e-13
NPDC1	ENSG00000107281.10	neural proliferation, differentiation and control 1	protein_coding	0.9	4.34	2.54265e-07	4.67027e-07	0.53	4.32402e-08
RDH13	ENSG00000160439.16	retinol dehydrogenase 13	protein_coding	0.89	4.34	2.35929e-05	0.00558191	0.31	0.00458112
MGRN1	ENSG00000102858.13	mahogunin ring finger 1	protein_coding	0.88	6.75	2.3422e-13	6.59641e-13	0.75	8.74201e-19
RPS15A	ENSG00000134419.15	ribosomal protein S15a	protein_coding	0.88	5.66	2.19843e-11	1.74139e-09	0.63	8.30225e-12
YWHAH	ENSG00000128245.15	tyrosine 3-monooxygenase/tryptophan 5-monooxygenase activation protein eta	protein_coding	0.87	7.32	2.03876e-15	1.26727e-12	0.74	4.5092e-18
DYRK2	ENSG00000127334.11	dual specificity tyrosine phosphorylation regulated kinase 2	protein_coding	0.86	5.18	2.16339e-13	5.48142e-11	0.68	1.60289e-14
TNFRSF10A	ENSG00000104689.10	TNF receptor superfamily member 10a	protein_coding	0.85	3.47	6.89825e-10	4.68706e-08	0.57	1.55564e-09
ATG12	ENSG00000145782.13	autophagy related 12	protein_coding	0.85	4.99	3.08927e-16	2.41728e-13	0.77	5.82714e-20
LPIN3	ENSG00000132793.12	lipin 3	protein_coding	0.85	4.37	2.87399e-09	1.17744e-07	0.56	6.07614e-09
GTF3A	ENSG00000122034.17	general transcription factor IIIA	protein_coding	0.85	6.15	1.20387e-13	1.06378e-10	0.67	5.68788e-14
RPL28	ENSG00000108107.15	ribosomal protein L28	protein_coding	0.84	8.55	2.40176e-09	5.71554e-09	0.61	5.89573e-11
DOK4	ENSG00000125170.11	docking protein 4	protein_coding	0.84	6.19	4.50666e-09	1.89371e-08	0.59	3.9044e-10
ALDOA	ENSG00000149925.22	aldolase, fructose-bisphosphate A	protein_coding	0.83	3.45	2.5309e-07	4.60057e-06	0.49	9.50726e-07
EEF2K	ENSG00000103319.12	eukaryotic elongation factor 2 kinase	protein_coding	0.82	5.1	1.16617e-15	1.62772e-12	0.74	8.23059e-18
TTC39C	ENSG00000168234.13	tetratricopeptide repeat domain 39C	protein_coding	0.82	3	3.8395e-06	0.000349907	0.39	0.000199906
ABCC1	ENSG00000103222.20	ATP binding cassette subfamily C member 1	protein_coding	0.82	6.17	2.1175e-11	1.88044e-09	0.63	9.45374e-12
TMED9	ENSG00000184840.12	transmembrane p24 trafficking protein 9	protein_coding	0.82	7.56	5.88974e-13	1.30733e-10	0.67	8.36774e-14
TPCN2	ENSG00000162341.18	two pore segment channel 2	protein_coding	0.82	3.7	2.11569e-10	2.93981e-08	0.58	7.66842e-10
NCR3LG1	ENSG00000188211.9	natural killer cell cytotoxicity receptor 3 ligand 1	protein_coding	0.81	3.42	0.00010948	0.00427937	0.32	0.00342198
ACTN1	ENSG00000072110.15	actinin alpha 1	protein_coding	0.8	7.41	1.18007e-07	2.90341e-07	0.54	2.21752e-08
OTULIN	ENSG00000154124.5	OTU deubiquitinase with linear linkage specificity	protein_coding	0.8	4.78	1.24383e-16	4.09435e-13	0.76	2.45721e-19
SRM	ENSG00000116649.10	spermidine synthase	protein_coding	0.79	4.97	1.06447e-08	4.861e-08	0.57	1.64259e-09
PGM3	ENSG00000013375.16	phosphoglucomutase 3	protein_coding	0.78	4.9	3.15231e-15	7.15805e-12	0.72	2.45214e-16
STAT2	ENSG00000170581.14	signal transducer and activator of transcription 2	protein_coding	0.78	6.37	8.94634e-13	3.0693e-10	0.66	4.00865e-13
SPATS2L	ENSG00000196141.14	spermatogenesis associated serine rich 2 like	protein_coding	0.78	6.84	1.10892e-11	1.12495e-08	0.6	1.73403e-10
FZD4	ENSG00000174804.4	frizzled class receptor 4	protein_coding	0.76	7.37	4.02078e-08	9.37487e-07	0.52	1.13269e-07
FNDC3B	ENSG00000075420.13	fibronectin type III domain containing 3B	protein_coding	0.76	7.35	5.75684e-12	1.36073e-10	0.67	9.02425e-14
RPS5	ENSG00000083845.9	ribosomal protein S5	protein_coding	0.76	8.63	2.42181e-08	2.56829e-09	0.62	1.58909e-11
ZEB1	ENSG00000148516.22	zinc finger E-box binding homeobox 1	protein_coding	0.75	5.71	1.08192e-08	3.94567e-07	0.53	3.41534e-08
CKAP2	ENSG00000136108.15	cytoskeleton associated protein 2	protein_coding	0.75	4.15	1.70973e-09	7.02694e-11	0.68	2.58982e-14
ANKRD13A	ENSG00000076513.17	ankyrin repeat domain 13A	protein_coding	0.75	6.43	1.17651e-08	1.47582e-06	0.51	2.09965e-07
FRMD8	ENSG00000126391.14	FERM domain containing 8	protein_coding	0.74	5.27	1.53499e-14	3.49073e-13	0.76	1.59208e-19
MMS22L	ENSG00000146263.11	MMS22 like, DNA repair protein	protein_coding	0.74	3.18	1.05859e-09	5.37227e-10	0.65	1.08917e-12
GNAI2	ENSG00000114353.17	G protein subunit alpha i2	protein_coding	0.71	8.26	3.19241e-12	3.32657e-10	0.66	4.63416e-13
SMC4	ENSG00000113810.16	structural maintenance of chromosomes 4	protein_coding	0.71	4.42	3.98422e-07	1.40657e-08	0.59	2.46144e-10
TMEM135	ENSG00000166575.17	transmembrane protein 135	protein_coding	0.69	5.4	2.33724e-11	1.51786e-08	0.59	2.76886e-10
TRAF1	ENSG00000056558.11	TNF receptor associated factor 1	protein_coding	0.68	4.07	0.00021885	0.00132668	0.35	0.000925643
TMEM43	ENSG00000170876.8	transmembrane protein 43	protein_coding	0.67	6.54	2.66449e-10	3.90612e-09	0.62	3.17763e-11
SPRED1	ENSG00000166068.13	sprouty related EVH1 domain containing 1	protein_coding	0.67	6.09	1.22038e-08	2.56829e-09	0.62	1.58909e-11
CARD8	ENSG00000105483.18	caspase recruitment domain family member 8	protein_coding	0.66	5.1	1.22906e-12	2.04835e-10	0.66	1.9208e-13
RPL41	ENSG00000229117.9	ribosomal protein L41	protein_coding	0.66	7.37	8.09782e-09	2.04052e-08	0.59	4.37847e-10
RBM43	ENSG00000184898.7	RNA binding motif protein 43	protein_coding	0.64	4.8	1.21097e-07	3.58593e-06	0.49	6.85817e-07
RPL37A	ENSG00000197756.10	ribosomal protein L37a	protein_coding	0.64	8.96	2.22362e-08	3.91725e-08	0.58	1.18706e-09
SLC30A7	ENSG00000162695.12	solute carrier family 30 member 7	protein_coding	0.63	5.7	7.7716e-10	3.76524e-09	0.62	2.98939e-11
STX16	ENSG00000124222.22	syntaxin 16	protein_coding	0.63	5.51	7.11699e-14	8.42011e-13	0.75	1.63051e-18
PFN1	ENSG00000108518.8	profilin 1	protein_coding	0.63	8.09	2.13081e-09	2.35925e-08	0.59	5.47993e-10
ADORA2B	ENSG00000170425.3	adenosine A2b receptor	protein_coding	0.62	0.93	0.00699002	0.00810664	0.3	0.00688384
NAV1	ENSG00000134369.15	neuron navigator 1	protein_coding	0.62	5.22	3.6832e-05	7.94628e-05	0.42	3.42486e-05
KATNAL1	ENSG00000102781.14	katanin catalytic subunit A1 like 1	protein_coding	0.61	4.69	6.26483e-10	5.1576e-10	0.65	1.01422e-12
RPS27	ENSG00000177954.14	ribosomal protein S27	protein_coding	0.6	8.84	2.27146e-07	1.13785e-06	0.51	1.47646e-07
DSN1	ENSG00000149636.16	DSN1 component of MIS12 kinetochore complex	protein_coding	0.6	3.52	1.22436e-11	1.06378e-10	0.67	5.68788e-14
FNIP1	ENSG00000217128.12	folliculin interacting protein 1	protein_coding	0.6	5.23	1.01302e-09	4.54937e-09	0.61	4.07482e-11
OCIAD2	ENSG00000145247.12	OCIA domain containing 2	protein_coding	0.6	6.75	0.000486994	0.000246068	0.4	0.000132244
FBN1	ENSG00000166147.14	fibrillin 1	protein_coding	0.6	6.68	0.0053995	6.74075e-05	0.43	2.80481e-05
KIAA1841	ENSG00000162929.14	KIAA1841	protein_coding	0.59	2.38	1.17935e-07	9.20115e-08	0.56	4.23767e-09
NCLN	ENSG00000125912.11	nicalin	protein_coding	0.59	5.79	2.70693e-07	2.99874e-09	0.62	2.05274e-11
MYADM	ENSG00000179820.16	myeloid associated differentiation marker	protein_coding	0.58	6.58	0.000891216	0.000308674	0.39	0.000172637
RAD23A	ENSG00000179262.10	RAD23 homolog A, nucleotide excision repair protein	protein_coding	0.58	6.18	2.22469e-11	2.08111e-12	0.74	1.48082e-17
H2AX	ENSG00000188486.3	H2A,X variant histone	protein_coding	0.58	3.9	0.000202713	0.00427937	0.32	0.00342198
RPL31	ENSG00000071082.11	ribosomal protein L31	protein_coding	0.58	9.02	1.25589e-07	5.33616e-07	0.53	5.20806e-08
DDX55	ENSG00000111364.16	DEAD-box helicase 55	protein_coding	0.57	3.51	1.17826e-14	8.76047e-13	0.75	1.80521e-18
RPS6KA4	ENSG00000162302.13	ribosomal protein S6 kinase A4	protein_coding	0.57	4.87	6.12534e-07	4.74087e-06	0.48	9.89042e-07
TIAF1	ENSG00000221995.5	TGFB1-induced anti-apoptotic factor 1	protein_coding	0.55	0.76	0.000155168	0.000836121	0.36	0.000547298
NARF	ENSG00000141562.18	nuclear prelamin A recognition factor	protein_coding	0.55	4.97	1.22264e-08	4.54937e-09	0.61	4.07482e-11
CISD2	ENSG00000145354.12	CDGSH iron sulfur domain 2	protein_coding	0.55	5.03	2.07246e-09	7.19119e-08	0.57	2.945e-09
PLEKHG5	ENSG00000171680.23	pleckstrin homology and RhoGEF domain containing G5	protein_coding	0.55	3.52	3.7446e-05	7.12316e-05	0.43	2.99944e-05
MAST3	ENSG00000099308.10	microtubule associated serine/threonine kinase 3	protein_coding	0.55	4.38	9.1731e-05	1.77776e-05	0.46	5.38884e-06
ATXN1	ENSG00000124788.19	ataxin 1	protein_coding	0.54	5.66	9.97127e-09	2.44609e-07	0.54	1.73878e-08
DLL1	ENSG00000198719.9	delta like canonical Notch ligand 1	protein_coding	0.54	3.7	0.00102238	0.0224955	0.26	0.0206031
ITGB1	ENSG00000150093.20	integrin subunit beta 1	protein_coding	0.53	8.81	1.5835e-06	2.2386e-06	0.5	3.67193e-07
SKI	ENSG00000157933.10	SKI proto-oncogene	protein_coding	0.53	6.49	4.26906e-07	2.11802e-05	0.45	6.71482e-06
MED17	ENSG00000042429.12	mediator complex subunit 17	protein_coding	0.53	1.96	5.39054e-11	7.97131e-11	0.68	3.29059e-14
RPL8	ENSG00000161016.18	ribosomal protein L8	protein_coding	0.53	9.96	1.86597e-05	4.60057e-06	0.49	9.50726e-07
TBL1XR1	ENSG00000177565.18	TBL1X receptor 1	protein_coding	0.52	7.35	1.0033e-07	1.61212e-07	0.55	9.57932e-09
FLCN	ENSG00000154803.13	folliculin	protein_coding	0.51	4.45	2.36186e-07	6.30193e-07	0.53	6.56076e-08
TTC9C	ENSG00000162222.14	tetratricopeptide repeat domain 9C	protein_coding	0.51	4.01	6.36306e-13	9.94387e-12	0.71	4.99909e-16
FBXO48	ENSG00000204923.4	F-box protein 48	protein_coding	0.51	2.53	5.69355e-06	3.35542e-05	0.44	1.19115e-05
ZNF622	ENSG00000173545.5	zinc finger protein 622	protein_coding	0.51	4.88	1.24073e-09	1.88044e-09	0.63	9.45374e-12
LENG8	ENSG00000167615.17	leukocyte receptor cluster member 8	protein_coding	0.51	5.99	0.00103706	0.0334377	0.24	0.0313289
EEF2	ENSG00000167658.16	eukaryotic translation elongation factor 2	protein_coding	0.5	11.19	3.54426e-06	1.72863e-07	0.55	1.05904e-08
JPT2	ENSG00000206053.13	Jupiter microtubule associated homolog 2	protein_coding	0.5	7.07	4.21253e-06	2.31061e-05	0.45	7.48707e-06
GEN1	ENSG00000178295.15	GEN1 Holliday junction 5' flap endonuclease	protein_coding	0.49	3	1.21739e-05	5.20185e-06	0.48	1.11618e-06
CLCC1	ENSG00000121940.16	chloride channel CLIC like 1	protein_coding	0.49	4.4	1.10356e-10	1.4935e-09	0.63	6.39441e-12
MRNIP	ENSG00000161010.15	MRN complex interacting protein	protein_coding	0.49	3.56	7.12105e-05	0.0139818	0.28	0.012399
FBXL19	ENSG00000099364.18	F-box and leucine rich repeat protein 19	protein_coding	0.49	3.78	4.50795e-05	5.88534e-06	0.48	1.31028e-06
BGN	ENSG00000182492.16	biglycan	protein_coding	0.49	9.32	0.01178	0.00640663	0.3	0.00532653
CTSB	ENSG00000164733.22	cathepsin B	protein_coding	0.49	10.31	0.00599091	0.00402298	0.32	0.00319622
SYNGR2	ENSG00000108639.8	synaptogyrin 2	protein_coding	0.48	7.24	3.97697e-05	5.11858e-05	0.43	2.00383e-05
TPM3	ENSG00000143549.21	tropomyosin 3	protein_coding	0.48	8.04	2.39879e-10	2.11225e-09	0.63	1.14888e-11
YWHAG	ENSG00000170027.7	tyrosine 3-monooxygenase/tryptophan 5-monooxygenase activation protein gamma	protein_coding	0.48	7.78	1.68002e-08	8.0266e-09	0.6	1.0162e-10
XYLT2	ENSG00000015532.10	xylosyltransferase 2	protein_coding	0.48	5.4	9.06433e-06	9.28366e-06	0.47	2.35853e-06
CLIC4	ENSG00000169504.15	chloride intracellular channel 4	protein_coding	0.47	9.39	0.0042743	0.0170427	0.27	0.0153267
SLC27A1	ENSG00000130304.17	solute carrier family 27 member 1	protein_coding	0.47	4.83	5.17379e-05	8.49371e-07	0.52	9.89389e-08
BTF3	ENSG00000145741.16	basic transcription factor 3	protein_coding	0.46	8.29	1.18859e-09	2.35925e-08	0.59	5.47993e-10
TAF11	ENSG00000064995.18	TATA-box binding protein associated factor 11	protein_coding	0.46	4.1	1.06433e-11	8.66623e-11	0.68	3.8551e-14
FEM1A	ENSG00000141965.5	fem-1 homolog A	protein_coding	0.46	0.73	0.00291595	0.00194386	0.34	0.00142322
POLR3D	ENSG00000168495.13	RNA polymerase III subunit D	protein_coding	0.46	4.42	7.74989e-09	5.03624e-08	0.57	1.7325e-09
ARHGEF37	ENSG00000183111.12	Rho guanine nucleotide exchange factor 37	protein_coding	0.46	5.32	0.00301171	0.0410656	0.24	0.0388846
S100PBP	ENSG00000116497.18	S100P binding protein	protein_coding	0.46	4.23	1.57694e-08	1.02144e-07	0.56	4.94153e-09
SLC33A1	ENSG00000169359.16	solute carrier family 33 member 1	protein_coding	0.45	4.84	1.18407e-05	4.08716e-05	0.44	1.52015e-05
PGRMC1	ENSG00000101856.10	progesterone receptor membrane component 1	protein_coding	0.45	8.18	1.64469e-05	6.04465e-05	0.43	2.45542e-05
FNBP1	ENSG00000187239.17	formin binding protein 1	protein_coding	0.45	5.81	1.38726e-05	0.000798281	0.36	0.000519012
PLEKHM2	ENSG00000116786.13	pleckstrin homology and RUN domain containing M2	protein_coding	0.45	5.92	5.04918e-07	2.47006e-09	0.62	1.48976e-11
NCKIPSD	ENSG00000213672.8	NCK interacting protein with SH3 domain	protein_coding	0.45	5.04	3.46572e-05	6.55695e-05	0.43	2.71211e-05
FBRS	ENSG00000156860.16	fibrosin	protein_coding	0.45	6.14	6.20048e-08	1.30733e-10	0.67	8.36774e-14
MCM6	ENSG00000076003.5	minichromosome maintenance complex component 6	protein_coding	0.44	4.87	5.42014e-06	7.75299e-06	0.47	1.87055e-06
POFUT2	ENSG00000186866.17	protein O-fucosyltransferase 2	protein_coding	0.43	4.47	1.1025e-06	2.2386e-06	0.5	3.67193e-07
ANKMY1	ENSG00000144504.15	ankyrin repeat and MYND domain containing 1	protein_coding	0.43	3.12	9.05199e-06	9.67763e-07	0.52	1.18342e-07
KLHDC10	ENSG00000128607.14	kelch domain containing 10	protein_coding	0.43	6.74	2.11097e-07	5.89562e-07	0.53	5.98239e-08
H2AZ1	ENSG00000164032.12	H2A,Z variant histone 1	protein_coding	0.42	6.06	1.41859e-05	1.49389e-05	0.46	4.32371e-06
CNNM3	ENSG00000168763.16	cyclin and CBS domain divalent metal cation transport mediator 3	protein_coding	0.41	5.51	2.09326e-06	1.21554e-05	0.47	3.32733e-06
DAZAP1	ENSG00000071626.17	DAZ associated protein 1	protein_coding	0.41	5.87	2.91776e-10	3.61986e-11	0.69	7.09688e-15
TLCD2	ENSG00000185561.10	TLC domain containing 2	protein_coding	0.4	3.29	0.00529034	0.0059176	0.31	0.00488455
TXNDC15	ENSG00000113621.15	thioredoxin domain containing 15	protein_coding	0.4	6.31	6.83487e-09	2.71124e-07	0.54	2.01252e-08
TOR1B	ENSG00000136816.16	torsin family 1 member B	protein_coding	0.39	4.74	4.36484e-07	1.97179e-06	0.5	3.09863e-07
BACH1	ENSG00000156273.16	BTB domain and CNC homolog 1	protein_coding	0.38	5.96	4.21149e-05	1.77776e-05	0.46	5.38884e-06
WASF2	ENSG00000158195.11	WASP family member 2	protein_coding	0.38	7.66	2.89862e-05	0.0026978	0.33	0.00205253
EXOSC2	ENSG00000130713.16	exosome component 2	protein_coding	0.38	4.11	1.92025e-07	1.58344e-05	0.46	4.65482e-06
NASP	ENSG00000132780.17	nuclear autoantigenic sperm protein	protein_coding	0.37	5.67	2.19421e-06	1.14533e-05	0.47	3.08448e-06
PPIA	ENSG00000196262.15	peptidylprolyl isomerase A	protein_coding	0.37	8.17	5.96859e-06	0.000121917	0.41	5.73952e-05
HAUS3	ENSG00000214367.9	HAUS augmin like complex subunit 3	protein_coding	0.37	3.33	9.89032e-06	1.00022e-06	0.52	1.23785e-07
GTPBP3	ENSG00000130299.17	GTP binding protein 3, mitochondrial	protein_coding	0.37	3.38	8.23945e-06	9.86379e-08	0.56	4.69467e-09
DENND2C	ENSG00000175984.15	DENN domain containing 2C	protein_coding	0.37	1.77	0.0142712	0.0213529	0.26	0.0194942
DENND6B	ENSG00000205593.12	DENN domain containing 6B	protein_coding	0.37	3.44	0.00266095	0.0107754	0.29	0.00936787
TANK	ENSG00000136560.14	TRAF family member associated NFKB activator	protein_coding	0.37	5.22	1.05194e-08	4.23165e-10	0.65	7.12937e-13
SLC40A1	ENSG00000138449.11	solute carrier family 40 member 1	protein_coding	0.37	7.83	0.00789778	0.0275355	0.25	0.0255253
NOM1	ENSG00000146909.8	nucleolar protein with MIF4G domain 1	protein_coding	0.36	4.05	9.98051e-07	5.70243e-07	0.53	5.71214e-08
TRIM23	ENSG00000113595.15	tripartite motif containing 23	protein_coding	0.36	4.52	0.000105263	0.000961784	0.36	0.00064229
RIC1	ENSG00000107036.12	RIC1 homolog, RAB6A GEF complex partner 1	protein_coding	0.36	4.93	7.4644e-05	0.000139114	0.41	6.72188e-05
MOCS3	ENSG00000124217.5	molybdenum cofactor synthesis 3	protein_coding	0.35	3.36	2.82464e-06	2.03611e-06	0.5	3.23406e-07
ASPH	ENSG00000198363.18	aspartate beta-hydroxylase	protein_coding	0.35	7.55	0.000576763	9.08877e-05	0.42	4.0295e-05
ZNF12	ENSG00000164631.19	zinc finger protein 12	protein_coding	0.35	5.25	2.35442e-06	1.91972e-07	0.55	1.23063e-08
TRIM3	ENSG00000110171.20	tripartite motif containing 3	protein_coding	0.35	3.29	3.72063e-05	7.29596e-06	0.48	1.72948e-06
FAM189B	ENSG00000160767.21	family with sequence similarity 189 member B	protein_coding	0.35	4.77	8.60273e-05	3.35542e-05	0.44	1.19115e-05
AKT1S1	ENSG00000204673.11	AKT1 substrate 1	protein_coding	0.35	5.48	0.000154841	0.000252335	0.39	0.000136228
SMURF1	ENSG00000198742.10	SMAD specific E3 ubiquitin protein ligase 1	protein_coding	0.35	5.18	0.00115247	0.00893171	0.29	0.00764634
OGA	ENSG00000198408.14	O-GlcNAcase	protein_coding	0.35	7.53	9.53593e-05	0.000162608	0.41	8.09894e-05
RHOC	ENSG00000155366.17	ras homolog family member C	protein_coding	0.34	7.05	0.0100593	0.0153129	0.27	0.0136664
CAD	ENSG00000084774.14	carbamoyl-phosphate synthetase 2, aspartate transcarbamylase, and dihydroorotase	protein_coding	0.34	5.13	0.00140733	0.000856289	0.36	0.000562433
RBMS2	ENSG00000076067.13	RNA binding motif single stranded interacting protein 2	protein_coding	0.34	6.41	0.000435388	0.00135812	0.35	0.000950349
ATF7IP	ENSG00000171681.12	activating transcription factor 7 interacting protein	protein_coding	0.34	6.71	7.61138e-05	1.40804e-05	0.46	4.01129e-06
KIAA1586	ENSG00000168116.14	KIAA1586	protein_coding	0.33	2.94	0.000709664	0.000112587	0.41	5.21548e-05
NDEL1	ENSG00000166579.16	nudE neurodevelopment protein 1 like 1	protein_coding	0.33	5	4.29087e-06	7.52331e-06	0.48	1.79931e-06
TMEM87A	ENSG00000103978.16	transmembrane protein 87A	protein_coding	0.33	5.82	4.5682e-05	0.000101154	0.42	4.58598e-05
PCSK7	ENSG00000160613.14	proprotein convertase subtilisin/kexin type 7	protein_coding	0.33	3.99	0.000212355	0.000115604	0.41	5.38398e-05
ZNF747	ENSG00000169955.7	zinc finger protein 747	protein_coding	0.32	3.8	1.71719e-05	0.000286247	0.39	0.000158005
CEP57L1	ENSG00000183137.15	centrosomal protein 57 like 1	protein_coding	0.32	3.43	0.00124236	0.00300042	0.33	0.00231026
PITPNB	ENSG00000180957.18	phosphatidylinositol transfer protein beta	protein_coding	0.32	5.74	9.86376e-06	6.45397e-06	0.48	1.47648e-06
GNPTAB	ENSG00000111670.16	N-acetylglucosamine-1-phosphate transferase subunits alpha and beta	protein_coding	0.31	6.14	0.000108411	6.92832e-05	0.43	2.90024e-05
HSP90AB1	ENSG00000096384.20	heat shock protein 90 alpha family class B member 1	protein_coding	0.3	10.07	0.000227311	0.00021096	0.4	0.000110259
IFNAR1	ENSG00000142166.13	interferon alpha and beta receptor subunit 1	protein_coding	0.3	7.03	0.000610678	0.000544786	0.37	0.000334371
EIF3D	ENSG00000100353.18	eukaryotic translation initiation factor 3 subunit D	protein_coding	0.3	7.47	1.55854e-05	3.69964e-06	0.49	7.14495e-07
GNPTG	ENSG00000090581.10	N-acetylglucosamine-1-phosphate transferase subunit gamma	protein_coding	0.3	6.14	0.00484926	0.00293719	0.33	0.00225583
SENP5	ENSG00000119231.11	SUMO specific peptidase 5	protein_coding	0.3	4.74	1.88039e-05	1.82968e-05	0.46	5.58837e-06
CFL1	ENSG00000172757.13	cofilin 1	protein_coding	0.3	8.58	0.00230323	0.00860083	0.29	0.00733928
RASA2	ENSG00000155903.13	RAS p21 protein activator 2	protein_coding	0.3	4.18	0.00501405	0.000233817	0.4	0.000124517
GINS1	ENSG00000101003.10	GINS complex subunit 1	protein_coding	0.3	2.37	0.0334737	0.0132231	0.28	0.0116782
RPA1	ENSG00000132383.12	replication protein A1	protein_coding	0.3	6.36	2.31124e-05	2.74795e-05	0.45	9.29474e-06
ZNF514	ENSG00000144026.12	zinc finger protein 514	protein_coding	0.3	3.65	0.000782954	0.00212231	0.34	0.00157054
DYRK1B	ENSG00000105204.14	dual specificity tyrosine phosphorylation regulated kinase 1B	protein_coding	0.29	4.68	0.0114643	0.0244798	0.26	0.0225389
SPCS3	ENSG00000129128.13	signal peptidase complex subunit 3	protein_coding	0.29	7.16	0.00143995	0.000171328	0.4	8.61801e-05
SLX4	ENSG00000188827.11	SLX4 structure-specific endonuclease subunit	protein_coding	0.29	2.81	0.00302454	0.00145331	0.35	0.001026
NUP155	ENSG00000113569.16	nucleoporin 155	protein_coding	0.28	5.12	0.000271963	0.000154345	0.41	7.61092e-05
GUCD1	ENSG00000138867.17	guanylyl cyclase domain containing 1	protein_coding	0.28	7.27	0.0081245	0.00126696	0.35	0.000878666
HDAC7	ENSG00000061273.18	histone deacetylase 7	protein_coding	0.28	6.18	0.00923823	0.00326186	0.32	0.00253516
LARP1	ENSG00000155506.18	La ribonucleoprotein 1, translational regulator	protein_coding	0.28	7.92	0.000870481	0.00281574	0.33	0.00215277
LPP	ENSG00000145012.13	LIM domain containing preferred translocation partner in lipoma	protein_coding	0.27	7.66	0.00958305	0.0035495	0.32	0.00278362
LGALS8	ENSG00000116977.19	galectin 8	protein_coding	0.27	5.8	0.000418577	0.000518936	0.38	0.000316095
BLOC1S4	ENSG00000186222.5	biogenesis of lysosomal organelles complex 1 subunit 4	protein_coding	0.27	3.47	8.21677e-05	6.04465e-05	0.43	2.45542e-05
SRGAP2	ENSG00000266028.7	SLIT-ROBO Rho GTPase activating protein 2	protein_coding	0.27	5.44	0.00997007	0.00247429	0.33	0.00186398
PFKL	ENSG00000141959.17	phosphofructokinase, liver type	protein_coding	0.27	8.36	0.0375616	0.0122904	0.28	0.0107945
FUS	ENSG00000089280.19	FUS RNA binding protein	protein_coding	0.26	7.57	0.00169254	0.000761487	0.37	0.000491652
WRAP53	ENSG00000141499.17	WD repeat containing antisense to TP53	protein_coding	0.26	3.16	0.00127933	7.52494e-05	0.42	3.20592e-05
RARS2	ENSG00000146282.18	arginyl-tRNA synthetase 2, mitochondrial	protein_coding	0.26	5	0.000322041	0.000629173	0.37	0.000394854
ACTB	ENSG00000075624.17	actin beta	protein_coding	0.25	11.79	0.0350125	0.0339702	0.24	0.0318508
SNRPD1	ENSG00000167088.11	small nuclear ribonucleoprotein D1 polypeptide	protein_coding	0.25	4.72	0.0012426	0.00126696	0.35	0.000878666
MAP3K2	ENSG00000169967.16	mitogen-activated protein kinase kinase kinase 2	protein_coding	0.25	6.27	0.00311367	0.000233817	0.4	0.000124517
IMP4	ENSG00000136718.10	IMP U3 small nucleolar ribonucleoprotein 4	protein_coding	0.25	5.57	0.000825574	0.00264	0.33	0.00200377
C12orf73	ENSG00000204954.10	chromosome 12 open reading frame 73	protein_coding	0.25	2.62	0.00852146	0.0451003	0.23	0.0429071
SCYL1	ENSG00000142186.17	SCY1 like pseudokinase 1	protein_coding	0.25	6.33	0.00286461	3.93839e-06	0.49	7.75698e-07
HMGN2	ENSG00000198830.11	high mobility group nucleosomal binding domain 2	protein_coding	0.24	6.96	0.00589349	0.00436818	0.32	0.00350051
TXNL4B	ENSG00000140830.9	thioredoxin like 4B	protein_coding	0.24	3.38	0.00218794	0.0153129	0.27	0.0136664
DCP2	ENSG00000172795.17	decapping mRNA 2	protein_coding	0.24	5.4	0.00716492	0.00148715	0.35	0.00105294
RFFL	ENSG00000092871.17	ring finger and FYVE like domain containing E3 ubiquitin protein ligase	protein_coding	0.23	4.08	0.0278359	0.0206193	0.26	0.0187811
NUCB1	ENSG00000104805.16	nucleobindin 1	protein_coding	0.23	8.55	0.0265865	0.00427937	0.32	0.00342198
STYX	ENSG00000198252.12	serine/threonine/tyrosine interacting protein	protein_coding	0.23	4.51	0.0122815	0.0150401	0.27	0.0134064
HELZ	ENSG00000198265.12	helicase with zinc finger	protein_coding	0.23	5.95	0.00384382	0.0059176	0.31	0.00488455
INTS7	ENSG00000143493.13	integrator complex subunit 7	protein_coding	0.23	3.92	0.00248136	0.0101838	0.29	0.00881463
RSBN1L	ENSG00000187257.16	round spermatid basic protein 1 like	protein_coding	0.23	5.04	0.00589765	0.0035495	0.32	0.00278362
ZNF566	ENSG00000186017.14	zinc finger protein 566	protein_coding	0.23	3.12	0.019289	0.0397851	0.24	0.0376292
KPNB1	ENSG00000108424.11	karyopherin subunit beta 1	protein_coding	0.23	7.52	3.61587e-05	9.33276e-05	0.42	4.1612e-05
DESI2	ENSG00000121644.19	desumoylating isopeptidase 2	protein_coding	0.23	5.38	0.0029762	0.00108051	0.36	0.000733276
BNIP2	ENSG00000140299.13	BCL2 interacting protein 2	protein_coding	0.22	6.01	0.0208206	0.017352	0.27	0.0156241
CERT1	ENSG00000113163.18	ceramide transporter 1	protein_coding	0.22	6.15	0.0106938	0.0228809	0.26	0.0209793
CSNK1A1	ENSG00000113712.19	casein kinase 1 alpha 1	protein_coding	0.22	6.31	0.00794684	0.0015906	0.35	0.00113594
PURB	ENSG00000146676.10	purine rich element binding protein B	protein_coding	0.21	6.32	0.00870291	0.00410455	0.32	0.00326836
RRP1B	ENSG00000160208.13	ribosomal RNA processing 1B	protein_coding	0.21	4.95	0.0043188	0.00287536	0.33	0.00220349
ZNF490	ENSG00000188033.10	zinc finger protein 490	protein_coding	0.21	2.32	0.0274164	0.0350668	0.24	0.0329498
DIP2A	ENSG00000160305.18	disco interacting protein 2 homolog A	protein_coding	0.21	5.08	0.00860242	0.00893171	0.29	0.00764634
STX2	ENSG00000111450.14	syntaxin 2	protein_coding	0.2	4.4	0.00415908	0.00236992	0.33	0.00177651
RAB33B	ENSG00000172007.7	RAB33B, member RAS oncogene family	protein_coding	0.2	4.12	0.0298957	0.00764245	0.3	0.00645589
ZSCAN22	ENSG00000182318.6	zinc finger and SCAN domain containing 22	protein_coding	0.2	2.09	0.0228099	0.0164423	0.27	0.0147507
WHAMM	ENSG00000156232.7	WASP homolog associated with actin, golgi membranes and microtubules	protein_coding	0.19	3.98	0.0241935	0.0142367	0.28	0.0126418
THOC5	ENSG00000100296.14	THO complex 5	protein_coding	0.19	4.73	0.0117679	0.00394017	0.32	0.00312425
TRIM27	ENSG00000204713.11	tripartite motif containing 27	protein_coding	0.19	5.53	0.000630447	0.000185319	0.4	9.45764e-05
UGGT1	ENSG00000136731.13	UDP-glucose glycoprotein glucosyltransferase 1	protein_coding	0.18	6.65	0.0359966	0.0318571	0.25	0.0297766
RNF216	ENSG00000011275.19	ring finger protein 216	protein_coding	0.18	5.79	0.00775195	0.0379588	0.24	0.0357799
WDR3	ENSG00000065183.16	WD repeat domain 3	protein_coding	0.18	4.99	0.0206898	0.0111865	0.28	0.00975511
ZNF3	ENSG00000166526.18	zinc finger protein 3	protein_coding	0.18	4.7	0.00318306	0.00455219	0.31	0.00366288
TFE3	ENSG00000068323.17	transcription factor binding to IGHM enhancer 3	protein_coding	0.17	6.13	0.0353105	0.0118374	0.28	0.010366
INTS4	ENSG00000149262.17	integrator complex subunit 4	protein_coding	0.17	4.44	0.00657568	0.00145331	0.35	0.001026
ZNF548	ENSG00000188785.12	zinc finger protein 548	protein_coding	0.17	3.65	0.0220911	0.0309487	0.25	0.0287691
ZCCHC3	ENSG00000247315.4	zinc finger CCHC-type containing 3	protein_coding	0.17	4.66	0.00819796	0.0221138	0.26	0.0202327
ZCCHC4	ENSG00000168228.15	zinc finger CCHC-type containing 4	protein_coding	0.16	3.15	0.0112982	0.00514934	0.31	0.00419366
CCT7	ENSG00000135624.16	chaperonin containing TCP1 subunit 7	protein_coding	0.15	7.59	0.0458593	0.00826992	0.29	0.0070334
CPSF7	ENSG00000149532.16	cleavage and polyadenylation specific factor 7	protein_coding	0.15	6.22	0.00494531	0.0217325	0.26	0.0198615
USP10	ENSG00000103194.16	ubiquitin specific peptidase 10	protein_coding	0.14	6.35	0.0279003	0.0294275	0.25	0.0273862
SUPT7L	ENSG00000119760.16	SPT7 like, STAGA complex subunit gamma	protein_coding	0.14	5.31	0.00126973	8.83887e-05	0.42	3.89736e-05
NONO	ENSG00000147140.17	non-POU domain containing octamer binding	protein_coding	0.11	8.15	0.0479861	0.0494764	0.23	0.0472746
EWSR1	ENSG00000182944.18	EWS RNA binding protein 1	protein_coding	-0.13	7.33	0.0299643	0.0105719	-0.29	0.00917629
ARPP19	ENSG00000128989.11	cAMP regulated phosphoprotein 19	protein_coding	-0.14	7.73	0.0481442	0.00653172	-0.3	0.00544128
KRR1	ENSG00000111615.14	KRR1 small subunit processome component homolog	protein_coding	-0.16	5.02	0.028937	0.000252335	-0.39	0.000136228
METTL14	ENSG00000145388.15	methyltransferase like 14	protein_coding	-0.16	4.8	0.0462453	0.0164423	-0.27	0.0147507
GPALPP1	ENSG00000133114.18	GPALPP motifs containing 1	protein_coding	-0.17	4.57	0.0455439	0.00231808	-0.33	0.00173313
HDAC2	ENSG00000196591.12	histone deacetylase 2	protein_coding	-0.18	6.21	0.0341396	0.011619	-0.28	0.0101607
MTPAP	ENSG00000107951.15	mitochondrial poly(A) polymerase	protein_coding	-0.18	4.32	0.00640513	0.000644107	-0.37	0.000405642
IRGQ	ENSG00000167378.8	immunity related GTPase Q	protein_coding	-0.18	4.74	0.0258952	0.00212231	-0.34	0.00157054
DUSP28	ENSG00000188542.10	dual specificity phosphatase 28	protein_coding	-0.18	1.75	0.0249689	0.00306545	-0.33	0.0023656
ERBIN	ENSG00000112851.15	erbb2 interacting protein	protein_coding	-0.18	7.07	0.0104059	0.000333109	-0.39	0.000188711
MRPL44	ENSG00000135900.4	mitochondrial ribosomal protein L44	protein_coding	-0.19	5.14	0.0405541	0.0404165	-0.24	0.0382465
TNRC6B	ENSG00000100354.21	trinucleotide repeat containing adaptor 6B	protein_coding	-0.19	5.53	0.0473414	0.0472511	-0.23	0.0450523
INTS10	ENSG00000104613.12	integrator complex subunit 10	protein_coding	-0.2	5.6	0.00187433	0.000239913	-0.4	0.000128331
ATL2	ENSG00000119787.14	atlastin GTPase 2	protein_coding	-0.2	5.68	0.0445406	0.000532026	-0.38	0.000325282
YRDC	ENSG00000196449.4	yrdC N6-threonylcarbamoyltransferase domain containing	protein_coding	-0.21	3.66	0.00861037	0.0035495	-0.32	0.00278362
TIMM8A	ENSG00000126953.8	translocase of inner mitochondrial membrane 8A	protein_coding	-0.22	2.69	0.00189354	0.000470751	-0.38	0.000282345
LEPROT	ENSG00000213625.9	leptin receptor overlapping transcript	protein_coding	-0.22	7.88	0.0156602	0.000743316	-0.37	0.000478284
MTX3	ENSG00000177034.17	metaxin 3	protein_coding	-0.22	4.88	0.0173485	0.000876678	-0.36	0.000577762
PLAA	ENSG00000137055.15	phospholipase A2 activating protein	protein_coding	-0.22	5.32	0.00417809	0.000150387	-0.41	7.37791e-05
HIRA	ENSG00000100084.14	histone cell cycle regulator	protein_coding	-0.22	3.18	0.0304089	0.0127524	-0.28	0.0112316
MTM1	ENSG00000171100.15	myotubularin 1	protein_coding	-0.23	4.57	0.0211235	0.00247429	-0.33	0.00186398
ATP6AP1	ENSG00000071553.18	ATPase H+ transporting accessory protein 1	protein_coding	-0.24	7.81	0.00702187	0.0134677	-0.28	0.011911
TMEM115	ENSG00000126062.4	transmembrane protein 115	protein_coding	-0.24	5.27	0.00954561	0.000836121	-0.36	0.000547298
MPLKIP	ENSG00000168303.9	M-phase specific PLK1 interacting protein	protein_coding	-0.24	4.55	0.00578596	0.000300962	-0.39	0.000167597
PPP6R2	ENSG00000100239.16	protein phosphatase 6 regulatory subunit 2	protein_coding	-0.24	5.73	0.0123412	0.000358666	-0.39	0.000205769
ARMCX3	ENSG00000102401.20	armadillo repeat containing X-linked 3	protein_coding	-0.24	6.4	0.0016774	1.99768e-05	-0.45	6.24023e-06
ZRANB1	ENSG00000019995.6	zinc finger RANBP2-type containing 1	protein_coding	-0.24	3.95	0.011414	0.00281574	-0.33	0.00215277
ATP6V0E1	ENSG00000113732.9	ATPase H+ transporting V0 subunit e1	protein_coding	-0.25	7.71	0.0083296	0.0035495	-0.32	0.00278362
PKNOX1	ENSG00000160199.15	PBX/knotted 1 homeobox 1	protein_coding	-0.25	4.42	0.00263862	0.00653172	-0.3	0.00544128
ZNF141	ENSG00000131127.14	zinc finger protein 141	protein_coding	-0.25	4.06	0.0335211	0.00300042	-0.33	0.00231026
EVI5	ENSG00000067208.14	ecotropic viral integration site 5	protein_coding	-0.25	4.5	0.00280291	8.1643e-05	-0.42	3.53908e-05
TRMO	ENSG00000136932.14	tRNA methyltransferase O	protein_coding	-0.25	3.57	0.00208718	0.000112587	-0.41	5.21548e-05
RBSN	ENSG00000131381.12	rabenosyn, RAB effector	protein_coding	-0.25	4.88	0.00248136	0.000743316	-0.37	0.000478284
ARMC8	ENSG00000114098.18	armadillo repeat containing 8	protein_coding	-0.25	5.43	0.000125796	2.03611e-06	-0.5	3.23406e-07
TULP4	ENSG00000130338.13	TUB like protein 4	protein_coding	-0.25	5.11	0.0048808	0.00152114	-0.35	0.0010802
KIAA0319L	ENSG00000142687.18	KIAA0319 like	protein_coding	-0.25	6.9	0.000750542	0.000482631	-0.38	0.00029058
KIAA2026	ENSG00000183354.12	KIAA2026	protein_coding	-0.25	5.19	0.0173355	0.000599783	-0.37	0.00037366
ARHGAP35	ENSG00000160007.19	Rho GTPase activating protein 35	protein_coding	-0.25	7.24	0.01278	0.0120626	-0.28	0.0105789
CHMP1B	ENSG00000255112.3	charged multivesicular body protein 1B	protein_coding	-0.26	6.01	0.013693	0.0228809	-0.26	0.0209793
HNRNPA2B1	ENSG00000122566.22	heterogeneous nuclear ribonucleoprotein A2/B1	protein_coding	-0.26	9.02	5.76109e-05	2.18135e-05	-0.45	6.96655e-06
PDE4D	ENSG00000113448.19	phosphodiesterase 4D	protein_coding	-0.26	5.98	0.0446432	0.00876651	-0.29	0.00749281
ATP2C1	ENSG00000017260.20	ATPase secretory pathway Ca2+ transporting 1	protein_coding	-0.26	7.18	0.00160676	0.000162608	-0.41	8.09894e-05
ZFAND4	ENSG00000172671.20	zinc finger AN1-type containing 4	protein_coding	-0.27	2.92	0.00194608	0.000175859	-0.4	8.88938e-05
MDH2	ENSG00000146701.12	malate dehydrogenase 2	protein_coding	-0.27	7.65	0.00591264	0.000222243	-0.4	0.000117256
KIF3A	ENSG00000131437.16	kinesin family member 3A	protein_coding	-0.27	4.5	0.00629629	0.000482631	-0.38	0.00029058
DCAF7	ENSG00000136485.15	DDB1 and CUL4 associated factor 7	protein_coding	-0.27	7.34	0.00036708	4.32728e-05	-0.44	1.63053e-05
MTHFD1	ENSG00000100714.17	methylenetetrahydrofolate dehydrogenase, cyclohydrolase and formyltetrahydrofolate synthetase 1	protein_coding	-0.28	6.28	0.0187586	0.00410455	-0.32	0.00326836
COX6B1	ENSG00000126267.11	cytochrome c oxidase subunit 6B1	protein_coding	-0.28	7.17	0.0163291	0.000708424	-0.37	0.00045261
VPS52	ENSG00000223501.9	VPS52 subunit of GARP complex	protein_coding	-0.28	5.32	0.000433856	0.000817159	-0.36	0.000533071
VGLL4	ENSG00000144560.15	vestigial like family member 4	protein_coding	-0.29	5.46	0.00188084	5.88383e-05	-0.43	2.37578e-05
OPA3	ENSG00000125741.5	outer mitochondrial membrane lipid metabolism regulator OPA3	protein_coding	-0.29	5.58	0.00123292	0.000333109	-0.39	0.000188711
IPO8	ENSG00000133704.10	importin 8	protein_coding	-0.29	6.41	1.20361e-05	2.46227e-06	-0.5	4.16807e-07
WDR11	ENSG00000120008.16	WD repeat domain 11	protein_coding	-0.29	6.24	0.00025762	8.61406e-05	-0.42	3.77653e-05
ZNF35	ENSG00000169981.11	zinc finger protein 35	protein_coding	-0.3	2.53	0.000286021	3.86109e-05	-0.44	1.41731e-05
CERK	ENSG00000100422.14	ceramide kinase	protein_coding	-0.3	5.97	0.0119786	0.000558256	-0.37	0.00034393
SLC9A7	ENSG00000065923.10	solute carrier family 9 member A7	protein_coding	-0.31	4.75	0.00405887	0.00455219	-0.31	0.00366288
NDUFS7	ENSG00000115286.20	NADH:ubiquinone oxidoreductase core subunit S7	protein_coding	-0.31	2.67	0.0476996	0.00170176	-0.34	0.00122573
PARP2	ENSG00000129484.14	poly(ADP-ribose) polymerase 2	protein_coding	-0.31	3.65	4.17327e-05	5.36453e-06	-0.48	1.16183e-06
MPL	ENSG00000117400.18	MPL proto-oncogene, thrombopoietin receptor	protein_coding	-0.31	0.44	0.0276397	0.00326186	-0.32	0.00253516
UQCR11	ENSG00000127540.12	ubiquinol-cytochrome c reductase, complex III subunit XI	protein_coding	-0.31	4.19	0.00284483	0.000817159	-0.36	0.000533071
DNAJA1	ENSG00000086061.16	DnaJ heat shock protein family (Hsp40) member A1	protein_coding	-0.31	7.53	0.000232964	4.83833e-05	-0.43	1.87023e-05
MAPK8	ENSG00000107643.16	mitogen-activated protein kinase 8	protein_coding	-0.31	5.13	0.000113113	5.53318e-06	-0.48	1.20936e-06
PRR13	ENSG00000205352.11	proline rich 13	protein_coding	-0.32	6.32	0.00170805	7.32143e-05	-0.42	3.10107e-05
MAEA	ENSG00000090316.16	macrophage erythroblast attacher, E3 ubiquitin ligase	protein_coding	-0.32	5.9	2.91754e-05	1.67781e-06	-0.51	2.49595e-07
PIGO	ENSG00000165282.14	phosphatidylinositol glycan anchor biosynthesis class O	protein_coding	-0.32	5.69	0.00067562	0.000544786	-0.37	0.000334371
PDS5B	ENSG00000083642.19	PDS5 cohesin associated factor B	protein_coding	-0.32	5.58	0.000932398	0.000308674	-0.39	0.000172637
ABCF1	ENSG00000204574.14	ATP binding cassette subfamily F member 1	protein_coding	-0.33	6.28	4.1072e-06	2.90341e-07	-0.54	2.21752e-08
BBS5	ENSG00000163093.12	Bardet-Biedl syndrome 5	protein_coding	-0.33	2.26	0.00134134	2.18135e-05	-0.45	6.96655e-06
DCAF16	ENSG00000163257.11	DDB1 and CUL4 associated factor 16	protein_coding	-0.33	4.86	0.000678396	1.67828e-05	-0.46	5.01027e-06
RFWD3	ENSG00000168411.14	ring finger and WD repeat domain 3	protein_coding	-0.33	5.05	3.13948e-05	3.45013e-05	-0.44	1.23309e-05
ARMC9	ENSG00000135931.18	armadillo repeat containing 9	protein_coding	-0.33	4.23	0.00024898	0.000128577	-0.41	6.11598e-05
BMPR1A	ENSG00000107779.14	bone morphogenetic protein receptor type 1A	protein_coding	-0.34	4.98	5.05646e-05	7.29596e-06	-0.48	1.72948e-06
GDPGP1	ENSG00000183208.12	GDP-D-glucose phosphorylase 1	protein_coding	-0.34	1.7	0.00162582	0.000558256	-0.37	0.00034393
SPIN1	ENSG00000106723.17	spindlin 1	protein_coding	-0.34	7.14	6.99341e-06	2.38876e-06	-0.5	4.00187e-07
CBX6	ENSG00000183741.12	chromobox 6	protein_coding	-0.34	6.78	0.00599493	0.000448157	-0.38	0.000266668
ATXN7L3B	ENSG00000253719.4	ataxin 7 like 3B	protein_coding	-0.34	7.1	4.00688e-09	3.23218e-09	-0.62	2.32567e-11
LCOR	ENSG00000196233.14	ligand dependent nuclear receptor corepressor	protein_coding	-0.35	5.53	0.0002973	1.14533e-05	-0.47	3.08448e-06
NAA30	ENSG00000139977.14	N-alpha-acetyltransferase 30, NatC catalytic subunit	protein_coding	-0.35	5.05	2.39984e-05	1.62499e-06	-0.51	2.39068e-07
AFDN	ENSG00000130396.20	afadin, adherens junction formation factor	protein_coding	-0.35	7.15	0.000786758	0.000252335	-0.39	0.000136228
TTLL1	ENSG00000100271.17	tubulin tyrosine ligase like 1	protein_coding	-0.36	2.7	0.000131266	5.70973e-06	-0.48	1.2596e-06
RAB11B	ENSG00000185236.12	RAB11B, member RAS oncogene family	protein_coding	-0.36	6.55	0.000234816	1.77776e-05	-0.46	5.38884e-06
ZBTB3	ENSG00000185670.9	zinc finger and BTB domain containing 3	protein_coding	-0.36	2.27	0.000461322	0.000586057	-0.37	0.000363737
PPIL4	ENSG00000131013.4	peptidylprolyl isomerase like 4	protein_coding	-0.36	4.89	0.000165539	3.26291e-05	-0.44	1.15047e-05
PLPP6	ENSG00000205808.7	phospholipid phosphatase 6	protein_coding	-0.36	3.26	0.000864823	2.03611e-06	-0.5	3.23406e-07
SMS	ENSG00000102172.16	spermine synthase	protein_coding	-0.37	6.94	0.00509684	4.9084e-09	-0.61	4.61021e-11
AP3S2	ENSG00000157823.17	adaptor related protein complex 3 subunit sigma 2	protein_coding	-0.37	5.16	1.50791e-05	4.06653e-06	-0.49	8.08747e-07
TVP23C	ENSG00000175106.17	trans-golgi network vesicle protein 23 homolog C	protein_coding	-0.37	0.73	0.0036898	0.0176548	-0.27	0.0158758
ZNF549	ENSG00000121406.9	zinc finger protein 549	protein_coding	-0.37	3.02	0.0102166	0.00927066	-0.29	0.00796224
RNF11	ENSG00000123091.5	ring finger protein 11	protein_coding	-0.38	7.25	1.13585e-06	1.00965e-09	-0.64	3.27574e-12
HP1BP3	ENSG00000127483.19	heterochromatin protein 1 binding protein 3	protein_coding	-0.38	7.49	1.69475e-09	6.2093e-11	-0.68	2.04004e-14
RLIM	ENSG00000131263.13	ring finger protein, LIM domain interacting	protein_coding	-0.38	6.28	3.21432e-06	2.62139e-06	-0.5	4.53124e-07
CLN8	ENSG00000182372.10	CLN8 transmembrane ER and ERGIC protein	protein_coding	-0.38	4.82	0.00995018	1.58344e-05	-0.46	4.65482e-06
DFFA	ENSG00000160049.12	DNA fragmentation factor subunit alpha	protein_coding	-0.39	5.51	5.86046e-07	1.62499e-06	-0.51	2.39068e-07
GDE1	ENSG00000006007.12	glycerophosphodiester phosphodiesterase 1	protein_coding	-0.39	5.91	4.89218e-06	3.48781e-09	-0.62	2.63675e-11
NANP	ENSG00000170191.5	N-acetylneuraminic acid phosphatase	protein_coding	-0.39	3.14	3.70032e-07	5.03624e-08	-0.57	1.7325e-09
SGPP2	ENSG00000163082.10	sphingosine-1-phosphate phosphatase 2	protein_coding	-0.39	6.91	0.00122496	0.00333306	-0.32	0.00259627
FAM122A	ENSG00000187866.10	family with sequence similarity 122A	protein_coding	-0.39	5.11	6.80333e-06	7.20577e-07	-0.52	7.8908e-08
MDC1	ENSG00000137337.15	mediator of DNA damage checkpoint 1	protein_coding	-0.39	5.11	7.99076e-05	4.32728e-05	-0.44	1.63053e-05
ZNF843	ENSG00000176723.10	zinc finger protein 843	protein_coding	-0.4	0.92	0.0028279	2.44698e-05	-0.45	8.04487e-06
DUSP19	ENSG00000162999.13	dual specificity phosphatase 19	protein_coding	-0.4	2.98	0.000105156	1.52346e-06	-0.51	2.19197e-07
COX18	ENSG00000163626.17	cytochrome c oxidase assembly factor COX18	protein_coding	-0.4	4.45	2.81887e-05	8.75344e-06	-0.47	2.18584e-06
ILVBL	ENSG00000105135.16	ilvB acetolactate synthase like	protein_coding	-0.4	6.58	0.000761408	9.5883e-05	-0.42	4.29897e-05
MRPS16	ENSG00000182180.14	mitochondrial ribosomal protein S16	protein_coding	-0.41	5.92	9.5509e-09	1.51786e-08	-0.59	2.76886e-10
SETD3	ENSG00000183576.13	SET domain containing 3, actin histidine methyltransferase	protein_coding	-0.41	7.02	1.2789e-06	8.22696e-07	-0.52	9.46744e-08
ZNF250	ENSG00000196150.14	zinc finger protein 250	protein_coding	-0.41	3.81	0.000204249	4.89257e-06	-0.48	1.03016e-06
TSPAN3	ENSG00000140391.15	tetraspanin 3	protein_coding	-0.41	7.87	2.47639e-09	7.656e-10	-0.64	2.03041e-12
NPTN	ENSG00000156642.17	neuroplastin	protein_coding	-0.42	7.31	4.19064e-09	2.47006e-09	-0.62	1.48976e-11
TMEM120B	ENSG00000188735.13	transmembrane protein 120B	protein_coding	-0.42	3.34	1.06537e-05	8.77879e-07	-0.52	1.03527e-07
BPNT1	ENSG00000162813.18	3'(2'), 5'-bisphosphate nucleotidase 1	protein_coding	-0.42	5.18	2.23461e-06	7.73062e-09	-0.6	9.57092e-11
LZIC	ENSG00000162441.12	leucine zipper and CTNNBIP1 domain containing	protein_coding	-0.44	5.6	5.9865e-09	1.88044e-09	-0.63	9.45374e-12
NDUFAF3	ENSG00000178057.15	NADH:ubiquinone oxidoreductase complex assembly factor 3	protein_coding	-0.44	5.45	2.54407e-05	2.90341e-07	-0.54	2.21752e-08
ASB1	ENSG00000065802.12	ankyrin repeat and SOCS box containing 1	protein_coding	-0.44	4.86	0.00112265	8.33502e-09	-0.6	1.079e-10
TGS1	ENSG00000137574.11	trimethylguanosine synthase 1	protein_coding	-0.45	4.71	2.7661e-06	3.26291e-05	-0.44	1.15047e-05
RAB19	ENSG00000146955.11	RAB19, member RAS oncogene family	protein_coding	-0.45	2.71	0.0268549	0.00427937	-0.32	0.00342198
F11R	ENSG00000158769.18	F11 receptor	protein_coding	-0.46	6.63	4.42932e-05	6.74075e-05	-0.43	2.80481e-05
POP5	ENSG00000167272.11	POP5 homolog, ribonuclease P/MRP subunit	protein_coding	-0.46	4.14	1.64426e-05	3.68684e-07	-0.54	3.10516e-08
ZNF793	ENSG00000188227.13	zinc finger protein 793	protein_coding	-0.46	2.61	0.00340205	6.55695e-05	-0.43	2.71211e-05
GSPT1	ENSG00000103342.13	G1 to S phase transition 1	protein_coding	-0.46	7.17	2.18317e-08	1.25868e-08	-0.6	2.06812e-10
RTN3	ENSG00000133318.14	reticulon 3	protein_coding	-0.46	7.74	2.05176e-06	0.000131999	-0.41	6.31252e-05
JAM2	ENSG00000154721.15	junctional adhesion molecule 2	protein_coding	-0.47	4.64	0.0263939	0.0120626	-0.28	0.0105789
BRMS1L	ENSG00000100916.14	BRMS1 like transcriptional repressor	protein_coding	-0.47	3.46	0.00028101	4.71823e-09	-0.61	4.32784e-11
IFNLR1	ENSG00000185436.12	interferon lambda receptor 1	protein_coding	-0.47	3.15	0.000490001	0.000599783	-0.37	0.00037366
HECTD1	ENSG00000092148.13	HECT domain E3 ubiquitin protein ligase 1	protein_coding	-0.47	7.31	1.6596e-06	6.30193e-07	-0.53	6.56076e-08
FOXRED1	ENSG00000110074.11	FAD dependent oxidoreductase domain containing 1	protein_coding	-0.47	4.52	2.06982e-05	8.77879e-07	-0.52	1.03527e-07
DDX24	ENSG00000089737.17	DEAD-box helicase 24	protein_coding	-0.47	7.41	3.02716e-07	4.36803e-07	-0.53	3.93749e-08
STEAP2	ENSG00000157214.14	STEAP2 metalloreductase	protein_coding	-0.48	4.73	0.0119928	8.75344e-06	-0.47	2.18584e-06
DHX30	ENSG00000132153.15	DExH-box helicase 30	protein_coding	-0.48	6.07	2.20891e-08	3.0693e-10	-0.66	4.00865e-13
CYP20A1	ENSG00000119004.16	cytochrome P450 family 20 subfamily A member 1	protein_coding	-0.49	5.12	7.71661e-10	2.44579e-08	-0.58	5.79312e-10
RUNDC1	ENSG00000198863.7	RUN domain containing 1	protein_coding	-0.49	4.88	1.53117e-11	1.02063e-10	-0.68	5.26177e-14
TACO1	ENSG00000136463.8	translational activator of cytochrome c oxidase I	protein_coding	-0.5	4.83	2.04042e-05	1.82968e-05	-0.46	5.58837e-06
GUF1	ENSG00000151806.14	GUF1 homolog, GTPase	protein_coding	-0.5	4.99	1.6612e-07	1.63136e-08	-0.59	3.101e-10
MRPS14	ENSG00000120333.4	mitochondrial ribosomal protein S14	protein_coding	-0.5	4.85	1.4205e-15	1.70019e-12	-0.74	9.10683e-18
SCAI	ENSG00000173611.18	suppressor of cancer cell invasion	protein_coding	-0.5	3.48	1.82465e-05	4.98981e-07	-0.53	4.74388e-08
TMEM33	ENSG00000109133.13	transmembrane protein 33	protein_coding	-0.51	6.35	1.66175e-09	1.15354e-10	-0.67	6.63113e-14
ARL8B	ENSG00000134108.14	ADP ribosylation factor like GTPase 8B	protein_coding	-0.51	6.55	5.22829e-11	4.40268e-10	-0.65	7.65256e-13
IBA57	ENSG00000181873.13	iron-sulfur cluster assembly factor IBA57	protein_coding	-0.51	4.1	2.32039e-05	1.40804e-05	-0.46	4.01129e-06
TMEM184C	ENSG00000164168.8	transmembrane protein 184C	protein_coding	-0.51	5.76	9.01319e-09	3.32657e-10	-0.66	4.63416e-13
STMP1	ENSG00000243317.8	short transmembrane mitochondrial protein 1	protein_coding	-0.51	5.9	1.9182e-07	3.94567e-07	-0.53	3.41534e-08
CUL3	ENSG00000036257.13	cullin 3	protein_coding	-0.51	6.07	7.1885e-10	4.95663e-10	-0.65	9.45284e-13
ADH5	ENSG00000197894.11	alcohol dehydrogenase 5 (class III), chi polypeptide	protein_coding	-0.52	7.62	5.97114e-10	8.65078e-09	-0.6	1.14498e-10
DAZAP2	ENSG00000183283.16	DAZ associated protein 2	protein_coding	-0.52	8.7	8.15401e-16	5.04037e-13	-0.76	4.23161e-19
ACBD5	ENSG00000107897.20	acyl-CoA binding domain containing 5	protein_coding	-0.52	6.32	7.5446e-08	4.68706e-08	-0.57	1.55564e-09
SCO1	ENSG00000133028.12	synthesis of cytochrome C oxidase 1	protein_coding	-0.52	5.3	1.76676e-09	8.27785e-10	-0.64	2.32698e-12
ARIH2	ENSG00000177479.20	ariadne RBR E3 ubiquitin protein ligase 2	protein_coding	-0.53	5.38	1.67395e-11	3.42079e-12	-0.73	4.68622e-17
TMEM169	ENSG00000163449.11	transmembrane protein 169	protein_coding	-0.53	2.53	0.0111482	0.00145331	-0.35	0.001026
BAIAP2	ENSG00000175866.15	BAR/IMD domain containing adaptor protein 2	protein_coding	-0.53	4.87	6.7531e-05	1.25171e-05	-0.46	3.45416e-06
SIAE	ENSG00000110013.13	sialic acid acetylesterase	protein_coding	-0.53	6.72	1.15115e-06	6.09656e-07	-0.53	6.2663e-08
NUDT21	ENSG00000167005.14	nudix hydrolase 21	protein_coding	-0.53	6.85	1.96802e-09	5.58151e-10	-0.65	1.16649e-12
LRP11	ENSG00000120256.11	LDL receptor related protein 11	protein_coding	-0.54	0.5	3.17564e-05	7.73062e-09	-0.6	9.57092e-11
APLP2	ENSG00000084234.18	amyloid beta precursor like protein 2	protein_coding	-0.54	10.08	1.10811e-11	1.10707e-10	-0.67	6.13815e-14
PSME3	ENSG00000131467.11	proteasome activator subunit 3	protein_coding	-0.54	6.67	1.4769e-12	2.93883e-11	-0.69	4.68545e-15
MSMO1	ENSG00000052802.13	methylsterol monooxygenase 1	protein_coding	-0.55	5.88	9.18746e-07	2.80512e-07	-0.54	2.11206e-08
TRUB2	ENSG00000167112.10	TruB pseudouridine synthase family member 2	protein_coding	-0.55	5.22	1.53025e-07	1.66928e-07	-0.55	1.0072e-08
PHF7	ENSG00000010318.21	PHD finger protein 7	protein_coding	-0.55	1.93	3.59262e-07	7.656e-10	-0.64	2.03041e-12
C17orf75	ENSG00000108666.10	chromosome 17 open reading frame 75	protein_coding	-0.55	4.51	2.19764e-11	6.81702e-10	-0.65	1.65471e-12
EFCAB11	ENSG00000140025.16	EF-hand calcium binding domain 11	protein_coding	-0.55	2.91	2.92764e-12	8.43639e-12	-0.71	3.50723e-16
TRPS1	ENSG00000104447.13	transcriptional repressor GATA binding 1	protein_coding	-0.55	4.79	2.53975e-06	1.03349e-06	-0.52	1.29437e-07
ZNF445	ENSG00000185219.17	zinc finger protein 445	protein_coding	-0.55	4.77	9.21533e-09	1.4613e-08	-0.59	2.611e-10
HACE1	ENSG00000085382.12	HECT domain and ankyrin repeat containing E3 ubiquitin protein ligase 1	protein_coding	-0.56	4.13	1.53723e-09	5.1576e-10	-0.65	1.01422e-12
PIGW	ENSG00000277161.2	phosphatidylinositol glycan anchor biosynthesis class W	protein_coding	-0.56	3.01	9.77701e-08	1.09537e-07	-0.56	5.47388e-09
DNAL1	ENSG00000119661.15	dynein axonemal light chain 1	protein_coding	-0.57	4.82	6.72895e-13	3.2814e-12	-0.73	4.26237e-17
PTGES3L	ENSG00000267060.7	prostaglandin E synthase 3 like	protein_coding	-0.57	-2.04	0.00151936	0.000106809	-0.42	4.89549e-05
ZNF619	ENSG00000177873.14	zinc finger protein 619	protein_coding	-0.57	2.79	8.34253e-10	1.09343e-09	-0.64	3.75286e-12
PXMP4	ENSG00000101417.12	peroxisomal membrane protein 4	protein_coding	-0.57	4.29	9.97033e-09	1.3547e-08	-0.6	2.32161e-10
ARFGEF1	ENSG00000066777.9	ADP ribosylation factor guanine nucleotide exchange factor 1	protein_coding	-0.57	6.62	8.18795e-08	1.15354e-10	-0.67	6.63113e-14
CDC14B	ENSG00000081377.17	cell division cycle 14B	protein_coding	-0.58	5.41	5.09218e-07	7.95744e-07	-0.52	9.04516e-08
RANBP6	ENSG00000137040.10	RAN binding protein 6	protein_coding	-0.58	5.17	1.58619e-09	5.58151e-10	-0.65	1.16649e-12
ATP5MPL	ENSG00000156411.10	ATP synthase membrane subunit 6,8PL	protein_coding	-0.58	5.46	7.73727e-09	2.93981e-08	-0.58	7.66842e-10
MT-ND5	ENSG00000198786.2	mitochondrially encoded NADH:ubiquinone oxidoreductase core subunit 5	protein_coding	-0.58	12.18	0.000162871	0.000216476	-0.4	0.00011369
FOSL2	ENSG00000075426.12	FOS like 2, AP-1 transcription factor subunit	protein_coding	-0.59	8.42	0.000120851	0.000470751	-0.38	0.000282345
CYBRD1	ENSG00000071967.12	cytochrome b reductase 1	protein_coding	-0.59	6.67	0.00014329	0.000166984	-0.4	8.35819e-05
APP	ENSG00000142192.21	amyloid beta precursor protein	protein_coding	-0.6	11.16	1.41875e-07	4.32627e-06	-0.49	8.77142e-07
MAPK1IP1L	ENSG00000168175.15	mitogen-activated protein kinase 1 interacting protein 1 like	protein_coding	-0.6	6.87	1.71548e-13	1.70315e-11	-0.7	1.55102e-15
STPG1	ENSG00000001460.18	sperm tail PG-rich repeat containing 1	protein_coding	-0.6	3.72	4.67503e-10	1.38212e-09	-0.63	5.60372e-12
PGAP6	ENSG00000129925.11	post-glycosylphosphatidylinositol attachment to proteins 6	protein_coding	-0.6	6.3	4.76835e-06	2.71124e-07	-0.54	2.01252e-08
SMIM19	ENSG00000176209.12	small integral membrane protein 19	protein_coding	-0.61	4.81	2.16103e-10	8.27785e-10	-0.64	2.32698e-12
MORN2	ENSG00000188010.15	MORN repeat containing 2	protein_coding	-0.61	4.3	1.10517e-08	1.7594e-08	-0.59	3.48368e-10
NMNAT1	ENSG00000173614.14	nicotinamide nucleotide adenylyltransferase 1	protein_coding	-0.62	3.75	2.08013e-09	2.66855e-09	-0.62	1.69356e-11
ATP5PB	ENSG00000116459.11	ATP synthase peripheral stalk-membrane subunit b	protein_coding	-0.63	7.43	4.09064e-15	8.09121e-12	-0.71	3.20591e-16
ENTPD5	ENSG00000187097.13	ectonucleoside triphosphate diphosphohydrolase 5 (inactive)	protein_coding	-0.64	6.49	0.0147813	0.0248913	-0.26	0.02294
HSDL2	ENSG00000119471.15	hydroxysteroid dehydrogenase like 2	protein_coding	-0.64	6.86	7.0993e-09	6.65991e-09	-0.61	7.53235e-11
TATDN3	ENSG00000203705.11	TatD DNase domain containing 3	protein_coding	-0.66	4.41	1.89318e-14	3.01952e-12	-0.73	3.52371e-17
PLCL2	ENSG00000154822.18	phospholipase C like 2	protein_coding	-0.66	4.9	9.14826e-08	6.02171e-08	-0.57	2.26242e-09
TFDP2	ENSG00000114126.18	transcription factor Dp-2	protein_coding	-0.67	6.26	3.61795e-08	2.44579e-08	-0.58	5.79312e-10
DUSP6	ENSG00000139318.8	dual specificity phosphatase 6	protein_coding	-0.67	6.83	9.83656e-06	0.000101154	-0.42	4.58598e-05
VCL	ENSG00000035403.18	vinculin	protein_coding	-0.67	7.82	4.73337e-08	2.83413e-08	-0.58	7.25276e-10
MMACHC	ENSG00000132763.15	metabolism of cobalamin associated C	protein_coding	-0.7	3.51	2.33473e-08	7.71454e-08	-0.56	3.26838e-09
MCUR1	ENSG00000050393.11	mitochondrial calcium uniporter regulator 1	protein_coding	-0.7	5.7	9.69713e-15	6.3537e-12	-0.72	1.87807e-16
GBA2	ENSG00000070610.14	glucosylceramidase beta 2	protein_coding	-0.7	6.4	5.67201e-11	4.58052e-10	-0.65	8.21283e-13
RBBP8	ENSG00000101773.19	RB binding protein 8, endonuclease	protein_coding	-0.71	5.96	3.96562e-07	7.71454e-08	-0.56	3.26838e-09
SLC25A15	ENSG00000102743.15	solute carrier family 25 member 15	protein_coding	-0.71	3.75	3.15822e-05	1.03646e-11	-0.71	5.46116e-16
IRAK1BP1	ENSG00000146243.14	interleukin 1 receptor associated kinase 1 binding protein 1	protein_coding	-0.71	3.29	3.79611e-10	2.02116e-11	-0.7	2.19449e-15
HOMEZ	ENSG00000215271.9	homeobox and leucine zipper encoding	protein_coding	-0.71	4.36	1.60114e-12	9.80449e-11	-0.68	4.87282e-14
SCAMP4	ENSG00000227500.10	secretory carrier membrane protein 4	protein_coding	-0.71	6.13	1.33659e-10	1.32852e-11	-0.71	9.23727e-16
PPIL6	ENSG00000185250.16	peptidylprolyl isomerase like 6	protein_coding	-0.73	2.8	2.20382e-09	1.00965e-09	-0.64	3.27574e-12
LPAR1	ENSG00000198121.13	lysophosphatidic acid receptor 1	protein_coding	-0.73	3.97	0.00629438	2.18135e-05	-0.45	6.96655e-06
GNPNAT1	ENSG00000100522.10	glucosamine-phosphate N-acetyltransferase 1	protein_coding	-0.74	3.87	6.49955e-11	3.71772e-12	-0.73	5.66054e-17
MT-ND4	ENSG00000198886.2	mitochondrially encoded NADH:ubiquinone oxidoreductase core subunit 4	protein_coding	-0.74	14.03	5.02581e-05	7.99323e-06	-0.47	1.94538e-06
CPM	ENSG00000135678.12	carboxypeptidase M	protein_coding	-0.75	6.89	9.36938e-07	4.861e-08	-0.57	1.64259e-09
SCML2	ENSG00000102098.19	Scm polycomb group protein like 2	protein_coding	-0.75	0.34	6.80722e-07	8.57967e-08	-0.56	3.82251e-09
AGL	ENSG00000162688.17	amylo-alpha-1, 6-glucosidase, 4-alpha-glucanotransferase	protein_coding	-0.76	5.88	5.19711e-11	8.29457e-11	-0.68	3.55472e-14
SLC1A2	ENSG00000110436.13	solute carrier family 1 member 2	protein_coding	-0.77	-0.12	0.000761765	0.00105552	-0.36	0.000713996
SINHCAF	ENSG00000139146.14	SIN3-HDAC complex associated factor	protein_coding	-0.77	5.83	1.19101e-10	2.60974e-10	-0.66	2.99069e-13
SUMF1	ENSG00000144455.14	sulfatase modifying factor 1	protein_coding	-0.77	5.99	9.06696e-13	5.94928e-11	-0.68	1.8805e-14
TMPPE	ENSG00000188167.9	transmembrane protein with metallophosphoesterase domain	protein_coding	-0.78	1.69	7.58995e-08	6.41662e-09	-0.61	7.09316e-11
PTGR2	ENSG00000140043.11	prostaglandin reductase 2	protein_coding	-0.79	1.02	2.22912e-08	3.81436e-07	-0.53	3.25691e-08
DCPS	ENSG00000110063.10	decapping enzyme, scavenger	protein_coding	-0.79	5.06	1.20339e-06	7.70087e-07	-0.52	8.64486e-08
LHPP	ENSG00000107902.14	phospholysine phosphohistidine inorganic pyrophosphate phosphatase	protein_coding	-0.8	4.75	6.95821e-07	3.21529e-07	-0.54	2.56182e-08
RIMS3	ENSG00000117016.10	regulating synaptic membrane exocytosis 3	protein_coding	-0.81	2.48	1.84021e-05	7.44585e-08	-0.56	3.10159e-09
FZD2	ENSG00000180340.7	frizzled class receptor 2	protein_coding	-0.81	2.68	6.61938e-05	3.58593e-06	-0.49	6.85817e-07
HSD17B12	ENSG00000149084.13	hydroxysteroid 17-beta dehydrogenase 12	protein_coding	-0.82	5.75	7.96179e-16	6.59641e-13	-0.75	8.74201e-19
SPCS1	ENSG00000114902.14	signal peptidase complex subunit 1	protein_coding	-0.82	6.33	2.78636e-18	6.59641e-13	-0.75	8.74201e-19
TRIM45	ENSG00000134253.10	tripartite motif containing 45	protein_coding	-0.83	2.12	1.0142e-09	1.82549e-08	-0.59	3.68799e-10
KLHL15	ENSG00000174010.9	kelch like family member 15	protein_coding	-0.83	4.28	6.50037e-13	3.42079e-12	-0.73	4.68622e-17
TSPYL1	ENSG00000189241.8	TSPY like 1	protein_coding	-0.84	7.47	4.51393e-14	2.35255e-12	-0.73	1.97867e-17
ZNF556	ENSG00000172000.7	zinc finger protein 556	protein_coding	-0.84	0.15	0.0308073	1.21554e-05	-0.47	3.32733e-06
ACOX1	ENSG00000161533.12	acyl-CoA oxidase 1	protein_coding	-0.85	6.73	1.57847e-12	1.33044e-09	-0.63	5.24824e-12
TMEM245	ENSG00000106771.13	transmembrane protein 245	protein_coding	-0.86	7.67	3.60689e-12	1.31916e-12	-0.74	4.98045e-18
NISCH	ENSG00000010322.16	nischarin	protein_coding	-0.87	6.32	1.69243e-16	1.06747e-12	-0.75	2.98817e-18
CCN1	ENSG00000142871.18	cellular communication network factor 1	protein_coding	-0.87	8.27	0.000155845	0.000518936	-0.38	0.000316095
MT-ATP8	ENSG00000228253.1	mitochondrially encoded ATP synthase membrane subunit 8	protein_coding	-0.87	8.98	2.15862e-06	1.57343e-06	-0.51	2.2894e-07
MT-ATP6	ENSG00000198899.2	mitochondrially encoded ATP synthase membrane subunit 6	protein_coding	-0.87	12.37	3.65923e-07	6.09656e-07	-0.53	6.2663e-08
MYOM2	ENSG00000036448.10	myomesin 2	protein_coding	-0.89	3.64	1.88848e-06	5.70973e-06	-0.48	1.2596e-06
MT-ND1	ENSG00000198888.2	mitochondrially encoded NADH:ubiquinone oxidoreductase core subunit 1	protein_coding	-0.89	12.63	5.2164e-06	5.51473e-07	-0.53	5.45294e-08
ASAP2	ENSG00000151693.11	ArfGAP with SH3 domain, ankyrin repeat and PH domain 2	protein_coding	-0.89	5.58	4.32222e-10	1.18191e-09	-0.64	4.29089e-12
BCL7A	ENSG00000110987.9	BAF chromatin remodeling complex subunit BCL7A	protein_coding	-0.9	5.27	4.17596e-12	5.7106e-11	-0.68	1.73632e-14
CHP1	ENSG00000187446.12	calcineurin like EF-hand protein 1	protein_coding	-0.9	7.45	2.16693e-14	1.05572e-13	-0.78	5.12065e-21
SLC18B1	ENSG00000146409.12	solute carrier family 18 member B1	protein_coding	-0.9	4.63	8.0583e-14	4.36804e-12	-0.72	8.1916e-17
AGPAT4	ENSG00000026652.15	1-acylglycerol-3-phosphate O-acyltransferase 4	protein_coding	-0.91	3.96	6.71744e-11	4.21611e-09	-0.61	3.59966e-11
DYNLL2	ENSG00000264364.3	dynein light chain LC8-type 2	protein_coding	-0.91	7.6	1.03381e-19	3.80216e-14	-0.8	1.79432e-22
ZNRF3	ENSG00000183579.16	zinc and ring finger 3	protein_coding	-0.95	5.64	1.60232e-12	5.63981e-13	-0.76	5.76896e-19
CHDH	ENSG00000016391.11	choline dehydrogenase	protein_coding	-0.95	6.57	2.75735e-05	1.04805e-05	-0.47	2.75325e-06
PID1	ENSG00000153823.19	phosphotyrosine interaction domain containing 1	protein_coding	-0.97	2.77	6.50308e-07	4.21906e-07	-0.53	3.75235e-08
TLE4	ENSG00000106829.20	TLE family member 4, transcriptional corepressor	protein_coding	-0.98	4.15	9.44857e-15	1.55761e-12	-0.74	7.43313e-18
EIF1B	ENSG00000114784.4	eukaryotic translation initiation factor 1B	protein_coding	-0.98	5.55	4.26209e-21	6.56107e-14	-0.79	1.17593e-21
HSPA1B	ENSG00000204388.7	heat shock protein family A (Hsp70) member 1B	protein_coding	-0.99	5.84	7.46647e-09	7.96582e-10	-0.64	2.17514e-12
ISYNA1	ENSG00000105655.19	inositol-3-phosphate synthase 1	protein_coding	-0.99	5.8	4.99506e-08	2.03611e-06	-0.5	3.23406e-07
GALM	ENSG00000143891.17	galactose mutarotase	protein_coding	-1.01	6.46	9.30865e-10	2.88061e-06	-0.5	5.13482e-07
DNAH9	ENSG00000007174.18	dynein axonemal heavy chain 9	protein_coding	-1.01	1.48	1.15932e-05	6.918e-09	-0.61	8.00305e-11
FAM234B	ENSG00000084444.14	family with sequence similarity 234 member B	protein_coding	-1.01	4.87	1.83736e-12	3.75359e-10	-0.65	5.75413e-13
MORN4	ENSG00000171160.18	MORN repeat containing 4	protein_coding	-1.02	3.83	4.78173e-17	4.74798e-12	-0.72	9.86772e-17
MTMR10	ENSG00000166912.17	myotubularin related protein 10	protein_coding	-1.04	6.53	7.63179e-17	5.43826e-13	-0.76	5.20997e-19
IER3	ENSG00000137331.12	immediate early response 3	protein_coding	-1.06	4.83	2.64828e-06	2.70575e-06	-0.5	4.72516e-07
DMKN	ENSG00000161249.21	dermokine	protein_coding	-1.08	4.84	0.00209724	3.35941e-09	-0.62	2.47782e-11
EVC	ENSG00000072840.13	EvC ciliary complex subunit 1	protein_coding	-1.09	6.86	3.15221e-09	2.37726e-09	-0.62	1.39746e-11
FDX1	ENSG00000137714.3	ferredoxin 1	protein_coding	-1.09	5.34	1.5047e-20	1.01849e-13	-0.78	4.55728e-21
GNG4	ENSG00000168243.11	G protein subunit gamma 4	protein_coding	-1.09	0.35	0.00359149	3.3692e-06	-0.49	6.31646e-07
KLHL30	ENSG00000168427.9	kelch like family member 30	protein_coding	-1.1	0.4	2.17489e-06	4.07892e-07	-0.53	3.57855e-08
HOXB7	ENSG00000260027.5	homeobox B7	protein_coding	-1.1	4.72	1.18607e-14	4.55057e-12	-0.72	8.98489e-17
ZNF578	ENSG00000258405.11	zinc finger protein 578	protein_coding	-1.11	1.32	5.6741e-10	1.00965e-09	-0.64	3.27574e-12
ZFP42	ENSG00000179059.10	ZFP42 zinc finger protein	protein_coding	-1.12	-3.19	0.0355712	4.9621e-12	-0.72	1.08454e-16
COL14A1	ENSG00000187955.12	collagen type XIV alpha 1 chain	protein_coding	-1.15	6.74	2.2032e-05	1.14533e-05	-0.47	3.08448e-06
CNP	ENSG00000173786.17	2',3'-cyclic nucleotide 3' phosphodiesterase	protein_coding	-1.16	7.22	2.48118e-16	4.55057e-12	-0.72	8.98489e-17
KAZN	ENSG00000189337.17	kazrin, periplakin interacting protein	protein_coding	-1.17	5.53	5.80394e-16	1.26727e-12	-0.74	4.5092e-18
SLC19A2	ENSG00000117479.15	solute carrier family 19 member 2	protein_coding	-1.19	4.65	3.12267e-07	8.09121e-12	-0.71	3.20591e-16
ZYG11A	ENSG00000203995.10	zyg-11 family member A, cell cycle regulator	protein_coding	-1.2	1	0.00249716	0.00166435	-0.34	0.00119543
IER2	ENSG00000160888.7	immediate early response 2	protein_coding	-1.24	6.36	1.24895e-07	8.49452e-06	-0.47	2.10346e-06
TMEM25	ENSG00000149582.16	transmembrane protein 25	protein_coding	-1.25	4.92	5.11605e-12	2.08111e-12	-0.74	1.48082e-17
MT-CYB	ENSG00000198727.2	mitochondrially encoded cytochrome b	protein_coding	-1.29	13.13	9.86608e-11	1.5529e-09	-0.63	6.83112e-12
ACSL4	ENSG00000068366.20	acyl-CoA synthetase long chain family member 4	protein_coding	-1.31	7.41	1.06517e-16	3.10007e-13	-0.77	1.14675e-19
L2HGDH	ENSG00000087299.12	L-2-hydroxyglutarate dehydrogenase	protein_coding	-1.33	4.49	4.12224e-13	1.44552e-11	-0.71	1.10057e-15
HACD3	ENSG00000074696.13	3-hydroxyacyl-CoA dehydratase 3	protein_coding	-1.37	7.38	1.14568e-21	4.59916e-14	-0.8	3.42602e-22
SCD5	ENSG00000145284.12	stearoyl-CoA desaturase 5	protein_coding	-1.39	6.49	5.58844e-07	2.40606e-10	-0.66	2.58052e-13
RGS9BP	ENSG00000186326.4	regulator of G protein signaling 9 binding protein	protein_coding	-1.42	-1.5	1.06127e-06	6.94028e-08	-0.57	2.79411e-09
PLCXD3	ENSG00000182836.10	phosphatidylinositol specific phospholipase C X domain containing 3	protein_coding	-1.43	3.93	0.00074728	2.83357e-10	-0.66	3.46758e-13
PPM1K	ENSG00000163644.15	protein phosphatase, Mg2+/Mn2+ dependent 1K	protein_coding	-1.43	5.38	7.50525e-19	1.1404e-13	-0.78	6.49171e-21
RDH10	ENSG00000121039.10	retinol dehydrogenase 10	protein_coding	-1.44	6.55	3.90486e-14	2.85339e-13	-0.77	9.16386e-20
BHLHB9	ENSG00000198908.12	basic helix-loop-helix family member b9	protein_coding	-1.44	-3.75	2.48899e-06	3.01806e-08	-0.58	7.97498e-10
FBLN1	ENSG00000077942.19	fibulin 1	protein_coding	-1.44	6.26	1.58502e-06	1.33044e-09	-0.63	5.24824e-12
LIPG	ENSG00000101670.12	lipase G, endothelial type	protein_coding	-1.45	4.49	8.21603e-07	1.09343e-09	-0.64	3.75286e-12
PTX3	ENSG00000163661.4	pentraxin 3	protein_coding	-1.47	1.29	8.83331e-06	0.00148715	-0.35	0.00105294
LDLR	ENSG00000130164.14	low density lipoprotein receptor	protein_coding	-1.49	5.07	7.02589e-09	1.16729e-08	-0.6	1.83818e-10
NPTX1	ENSG00000171246.6	neuronal pentraxin 1	protein_coding	-1.51	0.07	0.00032984	3.81683e-06	-0.49	7.44386e-07
PCCB	ENSG00000114054.14	propionyl-CoA carboxylase subunit beta	protein_coding	-1.52	6.05	4.09109e-19	3.2182e-13	-0.76	1.27696e-19
TBC1D24	ENSG00000162065.14	TBC1 domain family member 24	protein_coding	-1.53	4.88	3.14808e-22	1.45096e-13	-0.78	1.32245e-20
ZNF560	ENSG00000198028.4	zinc finger protein 560	protein_coding	-1.53	-3.82	4.51738e-05	0.00115577	-0.35	0.000791251
LONRF2	ENSG00000170500.13	LON peptidase N-terminal domain and ring finger 2	protein_coding	-1.56	3.72	8.11174e-06	5.18039e-12	-0.72	1.19202e-16
GCM1	ENSG00000137270.11	glial cells missing transcription factor 1	protein_coding	-1.6	0.39	0.000610652	5.21109e-08	-0.57	1.82213e-09
C6orf132	ENSG00000188112.9	chromosome 6 open reading frame 132	protein_coding	-1.6	3.85	3.41969e-08	4.8289e-07	-0.53	4.53064e-08
VGLL3	ENSG00000206538.9	vestigial like family member 3	protein_coding	-1.63	3.74	6.91411e-08	3.3983e-08	-0.58	9.56078e-10
RAB11FIP4	ENSG00000131242.18	RAB11 family interacting protein 4	protein_coding	-1.67	5.28	9.01353e-17	3.04281e-14	-0.8	8.17043e-23
LGSN	ENSG00000146166.17	lengsin, lens protein with glutamine synthetase domain	protein_coding	-1.68	0.59	1.9987e-05	0.00014648	-0.41	7.15049e-05
MPP2	ENSG00000108852.15	membrane palmitoylated protein 2	protein_coding	-1.69	2.14	2.35054e-08	2.28642e-11	-0.7	2.82658e-15
FECH	ENSG00000066926.12	ferrochelatase	protein_coding	-1.75	6.33	7.82747e-23	1.23145e-13	-0.78	8.21385e-21
ABCG8	ENSG00000143921.9	ATP binding cassette subfamily G member 8	protein_coding	-1.76	-0.38	0.000406418	2.28423e-10	-0.66	2.34339e-13
MAGI3	ENSG00000081026.19	membrane associated guanylate kinase, WW and PDZ domain containing 3	protein_coding	-1.8	4.84	6.69867e-19	3.39006e-14	-0.8	1.20948e-22
CMTM4	ENSG00000183723.13	CKLF like MARVEL transmembrane domain containing 4	protein_coding	-1.81	7.19	2.02334e-18	4.77393e-14	-0.8	3.8906e-22
TYRO3	ENSG00000092445.12	TYRO3 protein tyrosine kinase	protein_coding	-1.83	4.68	2.35086e-08	0.000659641	-0.37	0.000416956
CBS	ENSG00000160200.18	cystathionine beta-synthase	protein_coding	-1.84	-1.84	3.64761e-07	7.25792e-09	-0.61	8.6462e-11
PRSS8	ENSG00000052344.16	serine protease 8	protein_coding	-1.85	5.99	2.03525e-12	6.87965e-13	-0.75	9.71966e-19
ZNF503	ENSG00000165655.17	zinc finger protein 503	protein_coding	-1.85	5.2	5.38941e-18	3.63227e-13	-0.76	1.7752e-19
HCAR1	ENSG00000196917.6	hydroxycarboxylic acid receptor 1	protein_coding	-1.9	2.06	1.9791e-07	1.50379e-11	-0.7	1.19773e-15
SFXN2	ENSG00000156398.13	sideroflexin 2	protein_coding	-1.9	5.59	5.01148e-09	5.7106e-11	-0.68	1.73632e-14
PRTG	ENSG00000166450.13	protogenin	protein_coding	-1.91	2.51	3.36558e-11	1.33648e-13	-0.78	1.04287e-20
ZNF726	ENSG00000213967.11	zinc finger protein 726	protein_coding	-1.96	0.63	1.08139e-22	2.03084e-14	-0.81	1.66973e-23
ZBTB8B	ENSG00000273274.2	zinc finger and BTB domain containing 8B	protein_coding	-2	-2.58	5.05107e-13	5.6025e-13	-0.76	5.5908e-19
ABHD17C	ENSG00000136379.12	abhydrolase domain containing 17C, depalmitoylase	protein_coding	-2.01	4.41	1.50956e-26	1.73172e-14	-0.81	8.49624e-24
MUC1	ENSG00000185499.16	mucin 1, cell surface associated	protein_coding	-2.14	7.33	9.45205e-14	1.73172e-14	-0.81	8.49624e-24
COLCA1	ENSG00000196167.10	colorectal cancer associated 1	lncRNA	-2.23	3.92	6.96584e-13	6.59641e-13	-0.75	8.74201e-19
MARVELD2	ENSG00000152939.17	MARVEL domain containing 2	protein_coding	-2.27	5.12	2.09171e-20	1.21056e-14	-0.82	1.44868e-24
PDGFRA	ENSG00000134853.12	platelet derived growth factor receptor alpha	protein_coding	-2.29	5.41	9.59204e-08	1.93523e-11	-0.7	2.01142e-15
SLITRK3	ENSG00000121871.4	SLIT and NTRK like family member 3	protein_coding	-2.29	-2.94	2.58124e-07	1.80401e-07	-0.55	1.12527e-08
PLPP4	ENSG00000203805.11	phospholipid phosphatase 4	protein_coding	-2.36	2.27	1.3099e-08	3.10007e-13	-0.77	1.14675e-19
H1-4	ENSG00000168298.7	H1,4 linker histone, cluster member	protein_coding	-2.36	-1.02	2.77384e-09	0.000761487	-0.37	0.000491652
SLC29A2	ENSG00000174669.12	solute carrier family 29 member 2	protein_coding	-2.38	3.3	5.91914e-19	6.35911e-14	-0.79	1.04606e-21
NPAP1	ENSG00000185823.5	nuclear pore associated protein 1	protein_coding	-2.5	-1.13	1.58157e-07	1.29814e-12	-0.74	4.75818e-18
TMPRSS12	ENSG00000186452.11	transmembrane serine protease 12	protein_coding	-2.65	-3.04	2.29824e-11	1.95727e-08	-0.59	4.10395e-10
BMP3	ENSG00000152785.8	bone morphogenetic protein 3	protein_coding	-2.68	0.59	4.58566e-06	2.48348e-07	-0.54	1.77617e-08
KCNK10	ENSG00000100433.16	potassium two pore domain channel subfamily K member 10	protein_coding	-2.93	1.79	1.2753e-11	7.99323e-06	-0.47	1.94538e-06
LIPH	ENSG00000163898.10	lipase H	protein_coding	-2.95	4.52	9.31292e-10	5.86688e-13	-0.76	6.40563e-19
TRPM6	ENSG00000119121.22	transient receptor potential cation channel subfamily M member 6	protein_coding	-2.99	2.47	3.23446e-13	1.63136e-08	-0.59	3.101e-10
MRO	ENSG00000134042.14	maestro	protein_coding	-3	4.49	1.01962e-13	1.00022e-06	-0.52	1.23785e-07
TNS4	ENSG00000131746.13	tensin 4	protein_coding	-3.14	1.66	6.88615e-17	8.3305e-14	-0.79	2.47471e-21
ALX1	ENSG00000180318.4	ALX homeobox 1	protein_coding	-3.24	0.44	1.32684e-09	1.99938e-12	-0.74	1.33852e-17
MYLK3	ENSG00000140795.13	myosin light chain kinase 3	protein_coding	-3.26	2.28	2.10379e-14	3.64665e-08	-0.58	1.06495e-09
TNNI1	ENSG00000159173.19	troponin I1, slow skeletal type	protein_coding	-3.39	2.95	7.54063e-12	6.35911e-14	-0.79	1.04606e-21
ESRP1	ENSG00000104413.18	epithelial splicing regulatory protein 1	protein_coding	-3.77	4.33	2.38874e-10	7.87183e-15	-0.83	1.43061e-25
CYP2B6	ENSG00000197408.10	cytochrome P450 family 2 subfamily B member 6	protein_coding	-4.08	3.19	1.28163e-09	6.98056e-13	-0.75	1.00593e-18
FAM83B	ENSG00000168143.9	family with sequence similarity 83 member B	protein_coding	-4.28	2.7	2.95427e-12	1.06423e-14	-0.83	7.76743e-25
SYT7	ENSG00000011347.10	synaptotagmin 7	protein_coding	-4.65	4.46	2.70566e-24	7.37364e-15	-0.85	1.21335e-26
SLC36A2	ENSG00000186335.9	solute carrier family 36 member 2	protein_coding	-5.29	5.3	1.55642e-10	3.10534e-07	-0.54	2.43897e-08

## Sheet: Table 4_miR-200c-3p
gene	Gene_id	Description	Biotype	LogFC	LogCPM	QLF_FDR	MW_FDR	Spearman_correlation_coef	Spearman_correlation_FDR
CA9	ENSG00000107159.13	carbonic anhydrase 9	protein_coding	5.31	6.69	2.79669e-12	1.05572e-13	0.78	5.12065e-21
CYP2J2	ENSG00000134716.11	cytochrome P450 family 2 subfamily J member 2	protein_coding	5.25	6.66	2.01504e-24	2.22993e-13	0.77	4.64726e-20
DNAH11	ENSG00000105877.18	dynein axonemal heavy chain 11	protein_coding	4.1	4.16	3.76165e-16	1.18191e-09	0.64	4.29089e-12
CDH4	ENSG00000179242.16	cadherin 4	protein_coding	3.73	3.9	4.25106e-13	1.72804e-05	0.46	5.1984e-06
NNMT	ENSG00000166741.8	nicotinamide N-methyltransferase	protein_coding	3.7	8.78	1.51092e-15	8.70709e-14	0.79	2.81003e-21
LOX	ENSG00000113083.15	lysyl oxidase	protein_coding	3.52	7.78	1.59117e-11	2.16722e-12	0.73	1.63093e-17
VSIG1	ENSG00000101842.14	V-set and immunoglobulin domain containing 1	protein_coding	3.5	0.95	4.28981e-17	1.974e-13	0.77	3.29789e-20
ST8SIA4	ENSG00000113532.13	ST8 alpha-N-acetyl-neuraminide alpha-2,8-sialyltransferase 4	protein_coding	3.46	5.15	2.02683e-25	9.42785e-15	0.83	3.99223e-25
IDO1	ENSG00000131203.13	indoleamine 2,3-dioxygenase 1	protein_coding	3.41	4.64	1.69232e-12	2.06907e-13	0.77	3.72246e-20
NETO2	ENSG00000171208.10	neuropilin and tolloid like 2	protein_coding	3.21	5.46	5.52287e-25	1.00013e-14	0.83	6.0232e-25
IGF2BP3	ENSG00000136231.14	insulin like growth factor 2 mRNA binding protein 3	protein_coding	3.12	1.04	1.26432e-07	3.51931e-08	0.58	1.00881e-09
VEGFA	ENSG00000112715.25	vascular endothelial growth factor A	protein_coding	3.08	9.5	4.79348e-28	6.35911e-14	0.79	1.04606e-21
GAL3ST1	ENSG00000128242.13	galactose-3-O-sulfotransferase 1	protein_coding	3.08	6.75	3.96894e-20	2.58784e-11	0.7	3.63625e-15
SLAMF7	ENSG00000026751.17	SLAM family member 7	protein_coding	3.06	3.92	1.1608e-13	1.27707e-11	0.71	8.48292e-16
LINC01559	ENSG00000180861.9	long intergenic non-protein coding RNA 1559	lncRNA	3	3	8.27818e-06	0.00381827	0.32	0.00301711
AIM2	ENSG00000163568.15	absent in melanoma 2	protein_coding	2.98	0.68	2.04415e-12	1.70315e-11	0.7	1.55102e-15
OR9Q1	ENSG00000186509.4	olfactory receptor family 9 subfamily Q member 1	protein_coding	2.96	-3.28	2.10604e-10	7.51175e-07	0.52	8.35001e-08
SCD	ENSG00000099194.6	stearoyl-CoA desaturase	protein_coding	2.83	8.1	3.90531e-16	2.74764e-13	0.77	8.21787e-20
TMEM45A	ENSG00000181458.10	transmembrane protein 45A	protein_coding	2.8	4.79	3.16569e-13	1.12381e-11	0.71	6.5004e-16
SLC37A2	ENSG00000134955.12	solute carrier family 37 member 2	protein_coding	2.71	3.75	4.90269e-18	3.91449e-14	0.8	2.02587e-22
DCLK1	ENSG00000133083.15	doublecortin like kinase 1	protein_coding	2.66	4.72	2.61221e-16	7.46732e-13	0.75	1.19788e-18
IGLON5	ENSG00000142549.9	IgLON family member 5	protein_coding	2.65	2.69	0.00195007	1.84429e-06	0.5	2.83229e-07
SLAMF6	ENSG00000162739.14	SLAM family member 6	protein_coding	2.64	2.73	9.01815e-13	1.03646e-11	0.71	5.46116e-16
LAPTM5	ENSG00000162511.8	lysosomal protein transmembrane 5	protein_coding	2.63	7.01	3.56418e-18	5.72081e-14	0.79	7.25632e-22
VIM	ENSG00000026025.16	vimentin	protein_coding	2.56	9.97	4.26854e-25	8.3305e-14	0.79	2.47471e-21
BHLHE41	ENSG00000123095.6	basic helix-loop-helix family member e41	protein_coding	2.53	6.28	1.98204e-19	2.94001e-14	0.8	7.17362e-23
GJC1	ENSG00000182963.11	gap junction protein gamma 1	protein_coding	2.49	4.45	1.92184e-26	7.43059e-15	0.84	2.91516e-26
BIRC3	ENSG00000023445.16	baculoviral IAP repeat containing 3	protein_coding	2.41	7	2.02549e-17	3.01952e-12	0.73	3.52371e-17
CCND1	ENSG00000110092.4	cyclin D1	protein_coding	2.33	8.84	1.00593e-22	1.99938e-12	0.74	1.34483e-17
HOXD13	ENSG00000128714.6	homeobox D13	protein_coding	2.33	-2	2.2346e-08	4.69122e-09	0.61	4.2795e-11
GPR55	ENSG00000135898.10	G protein-coupled receptor 55	protein_coding	2.24	-0.75	2.72906e-12	2.58784e-11	0.7	3.63625e-15
RASSF2	ENSG00000101265.16	Ras association domain family member 2	protein_coding	2.23	5.26	1.1325e-21	3.04281e-14	0.8	8.17043e-23
HLA-DPB1	ENSG00000223865.11	major histocompatibility complex, class II, DP beta 1	protein_coding	2.19	8.2	2.29422e-18	1.70019e-12	0.74	9.10683e-18
GBP2	ENSG00000162645.13	guanylate binding protein 2	protein_coding	2.16	6.84	4.03735e-21	5.92449e-14	0.79	8.19857e-22
FLT1	ENSG00000102755.12	fms related receptor tyrosine kinase 1	protein_coding	2.14	8.71	6.11294e-18	6.10065e-12	0.72	1.71597e-16
ABCC3	ENSG00000108846.16	ATP binding cassette subfamily C member 3	protein_coding	2.14	6.98	2.86333e-14	9.52435e-13	0.75	2.22042e-18
PLK2	ENSG00000145632.15	polo like kinase 2	protein_coding	2.14	6.2	7.8026e-23	3.04281e-14	0.8	8.17043e-23
HLA-DPA1	ENSG00000231389.7	major histocompatibility complex, class II, DP alpha 1	protein_coding	2.14	9.12	2.31407e-18	2.90259e-12	0.73	3.20937e-17
SLFN13	ENSG00000154760.14	schlafen family member 13	protein_coding	2.12	4.83	9.06574e-25	3.14529e-14	0.8	9.28945e-23
LCP1	ENSG00000136167.15	lymphocyte cytosolic protein 1	protein_coding	2.1	6.95	4.80092e-15	1.62772e-12	0.74	8.23059e-18
PPFIA4	ENSG00000143847.15	PTPRF interacting protein alpha 4	protein_coding	2.1	3.29	1.08697e-11	1.60178e-10	0.67	1.22243e-13
ALDOC	ENSG00000109107.14	aldolase, fructose-bisphosphate C	protein_coding	2.09	5.25	1.44334e-13	7.08314e-10	0.64	1.77128e-12
DEPP1	ENSG00000165507.9	DEPP1 autophagy regulator	protein_coding	2.05	7.71	7.56737e-16	1.92094e-12	0.74	1.22105e-17
ITGA5	ENSG00000161638.11	integrin subunit alpha 5	protein_coding	2.04	7.26	4.29312e-17	2.97619e-13	0.77	1.02599e-19
PTPN22	ENSG00000134242.16	protein tyrosine phosphatase non-receptor type 22	protein_coding	2.04	1.93	1.05513e-12	1.32852e-11	0.71	9.23727e-16
ANLN	ENSG00000011426.11	anillin actin binding protein	protein_coding	2.02	3.23	1.11295e-08	2.35255e-12	0.73	1.97867e-17
PLOD2	ENSG00000152952.12	procollagen-lysine,2-oxoglutarate 5-dioxygenase 2	protein_coding	2	8.06	2.45081e-15	6.10065e-12	0.72	1.71597e-16
CLEC2D	ENSG00000069493.15	C-type lectin domain family 2 member D	protein_coding	1.97	2.66	5.2491e-19	1.26727e-12	0.74	4.5092e-18
KLRC3	ENSG00000205810.9	killer cell lectin like receptor C3	protein_coding	1.96	-4.27	1.99115e-06	1.08563e-05	0.47	2.87482e-06
NCF2	ENSG00000116701.15	neutrophil cytosolic factor 2	protein_coding	1.91	4	1.64445e-14	2.78566e-12	0.73	2.91759e-17
NCAM1	ENSG00000149294.17	neural cell adhesion molecule 1	protein_coding	1.86	4.26	0.00012686	0.0257533	-0.25	0.0237833
DDB2	ENSG00000134574.12	damage specific DNA binding protein 2	protein_coding	1.85	4.97	2.00697e-32	1.06878e-14	0.83	8.11323e-25
SEL1L3	ENSG00000091490.11	SEL1L family member 3	protein_coding	1.83	7.01	4.52241e-20	2.85339e-13	0.77	9.16386e-20
KSR1	ENSG00000141068.14	kinase suppressor of ras 1	protein_coding	1.83	5.99	2.28304e-20	2.83357e-10	0.66	3.46758e-13
RASSF5	ENSG00000266094.8	Ras association domain family member 5	protein_coding	1.81	4.56	1.95643e-15	5.39493e-12	0.72	1.30575e-16
CSF2	ENSG00000164400.6	colony stimulating factor 2	protein_coding	1.8	-3.13	0.00142831	0.00779976	0.3	0.00659824
PCLAF	ENSG00000166803.14	PCNA clamp associated factor	protein_coding	1.78	0.47	6.56727e-13	4.11098e-11	0.69	9.10405e-15
FN1	ENSG00000115414.21	fibronectin 1	protein_coding	1.77	10.44	4.32667e-13	8.42011e-13	0.75	1.63051e-18
ADAM8	ENSG00000151651.16	ADAM metallopeptidase domain 8	protein_coding	1.77	2.78	2.93294e-12	1.30733e-10	0.67	8.36774e-14
HTR7	ENSG00000148680.16	5-hydroxytryptamine receptor 7	protein_coding	1.77	-0.08	1.7928e-09	4.21611e-09	0.61	3.59966e-11
MXD3	ENSG00000213347.10	MAX dimerization protein 3	protein_coding	1.77	0.96	2.9003e-12	2.37929e-11	0.7	3.07025e-15
SLC2A14	ENSG00000173262.12	solute carrier family 2 member 14	protein_coding	1.75	-1.28	2.11774e-06	2.58267e-06	0.5	4.44113e-07
CDCA7	ENSG00000144354.14	cell division cycle associated 7	protein_coding	1.73	1.38	1.30924e-08	1.50379e-11	0.7	1.19773e-15
DUSP4	ENSG00000120875.9	dual specificity phosphatase 4	protein_coding	1.73	3.67	1.8264e-11	5.7106e-11	0.68	1.73632e-14
EDN1	ENSG00000078401.7	endothelin 1	protein_coding	1.72	5.52	2.00223e-11	8.27831e-08	0.56	3.62717e-09
SLC2A3	ENSG00000059804.16	solute carrier family 2 member 3	protein_coding	1.71	6.4	9.72745e-09	5.40996e-08	0.57	1.92832e-09
OR2B6	ENSG00000124657.1	olfactory receptor family 2 subfamily B member 6	protein_coding	1.67	-4.09	0.000192476	0.000819717	0.36	0.000534448
PAG1	ENSG00000076641.4	phosphoprotein membrane anchor with glycosphingolipid microdomains 1	protein_coding	1.64	5.14	4.81818e-19	1.83738e-13	0.77	2.64411e-20
DOCK10	ENSG00000135905.20	dedicator of cytokinesis 10	protein_coding	1.63	4.91	1.127e-15	1.11549e-12	0.74	3.317e-18
SCEL	ENSG00000136155.17	sciellin	protein_coding	1.63	0.57	0.0222179	1.24963e-07	-0.56	6.62591e-09
IGF2	ENSG00000167244.21	insulin like growth factor 2	protein_coding	1.62	2.94	0.0237801	1.43689e-09	-0.63	5.98704e-12
ATP11A	ENSG00000068650.18	ATPase phospholipid transporting 11A	protein_coding	1.62	7.88	4.63764e-19	4.28332e-11	0.69	9.87528e-15
SERPINH1	ENSG00000149257.16	serpin family H member 1	protein_coding	1.6	7.5	2.45801e-16	2.16722e-12	0.73	1.63093e-17
BCL11B	ENSG00000127152.18	BAF chromatin remodeling complex subunit BCL11B	protein_coding	1.6	2.49	4.36619e-11	8.65078e-09	0.6	1.14498e-10
PPP1R18	ENSG00000146112.12	protein phosphatase 1 regulatory subunit 18	protein_coding	1.59	5.91	5.72098e-21	1.18826e-13	0.78	7.32344e-21
PTAFR	ENSG00000169403.12	platelet activating factor receptor	protein_coding	1.59	4.31	7.58809e-11	2.99874e-09	0.62	2.05274e-11
HLA-DMA	ENSG00000204257.15	major histocompatibility complex, class II, DM alpha	protein_coding	1.58	6.45	2.27614e-18	1.50379e-11	0.7	1.19773e-15
ADGRG6	ENSG00000112414.15	adhesion G protein-coupled receptor G6	protein_coding	1.58	6.12	2.82907e-10	1.21797e-07	0.56	6.38627e-09
WIPF1	ENSG00000115935.18	WAS/WASL interacting protein family member 1	protein_coding	1.55	6.31	9.90365e-19	5.92449e-14	0.79	8.19857e-22
RUNX1	ENSG00000159216.19	RUNX family transcription factor 1	protein_coding	1.55	5.54	1.2175e-08	7.32753e-11	0.68	2.8051e-14
PLOD1	ENSG00000083444.17	procollagen-lysine,2-oxoglutarate 5-dioxygenase 1	protein_coding	1.54	7.94	2.42449e-15	7.77088e-12	0.71	2.93388e-16
PREX1	ENSG00000124126.14	phosphatidylinositol-3,4,5-trisphosphate dependent Rac exchange factor 1	protein_coding	1.53	6.26	6.97617e-19	1.06747e-12	0.75	2.98817e-18
PLXND1	ENSG00000004399.13	plexin D1	protein_coding	1.53	7.55	6.79267e-19	4.09435e-13	0.76	2.45721e-19
CMTM3	ENSG00000140931.20	CKLF like MARVEL transmembrane domain containing 3	protein_coding	1.53	5.13	1.16987e-12	7.77088e-12	0.71	2.93388e-16
RASSF4	ENSG00000107551.21	Ras association domain family member 4	protein_coding	1.53	6.97	3.01052e-12	1.17326e-11	0.71	7.10824e-16
FSCN1	ENSG00000075618.18	fascin actin-bundling protein 1	protein_coding	1.51	6.12	6.25722e-15	9.15293e-12	0.71	4.18621e-16
BNIP3	ENSG00000176171.11	BCL2 interacting protein 3	protein_coding	1.51	7.49	1.09777e-20	5.04037e-13	0.76	4.23161e-19
CDH2	ENSG00000170558.10	cadherin 2	protein_coding	1.5	6.35	2.19405e-13	7.77088e-12	0.71	2.93388e-16
SNX10	ENSG00000086300.16	sorting nexin 10	protein_coding	1.5	6.23	1.16897e-17	2.35255e-12	0.73	1.97867e-17
ASB2	ENSG00000100628.12	ankyrin repeat and SOCS box containing 2	protein_coding	1.5	1.32	7.69169e-08	2.54089e-06	0.5	4.34627e-07
FSTL1	ENSG00000163430.12	follistatin like 1	protein_coding	1.49	8.59	5.42764e-14	3.1967e-11	0.69	5.53913e-15
KDR	ENSG00000128052.10	kinase insert domain receptor	protein_coding	1.47	7.79	3.25428e-10	3.68684e-07	0.54	3.10516e-08
ANGPTL2	ENSG00000136859.10	angiopoietin like 2	protein_coding	1.47	6.19	1.82963e-10	8.97825e-09	0.6	1.21483e-10
ADAM12	ENSG00000148848.14	ADAM metallopeptidase domain 12	protein_coding	1.46	3.34	0.000327127	2.99332e-05	0.45	1.03388e-05
PROS1	ENSG00000184500.16	protein S	protein_coding	1.45	7.25	4.69863e-08	1.88044e-09	0.63	9.45374e-12
FZD1	ENSG00000157240.4	frizzled class receptor 1	protein_coding	1.45	7.04	2.02042e-20	1.76453e-13	0.77	2.35537e-20
NDRG1	ENSG00000104419.17	N-myc downstream regulated 1	protein_coding	1.45	10.78	1.81618e-14	7.36256e-10	0.64	1.89618e-12
RASSF6	ENSG00000169435.14	Ras association domain family member 6	protein_coding	1.44	5.35	1.03311e-11	1.69407e-08	0.59	3.28673e-10
PECAM1	ENSG00000261371.6	platelet and endothelial cell adhesion molecule 1	protein_coding	1.44	9.16	2.29469e-17	3.42079e-12	0.73	4.68622e-17
SH3PXD2B	ENSG00000174705.13	SH3 and PX domains 2B	protein_coding	1.42	4.66	8.22322e-12	5.58151e-10	0.65	1.16649e-12
FBXL16	ENSG00000127585.12	F-box and leucine rich repeat protein 16	protein_coding	1.42	5.01	1.08822e-06	0.000216476	0.4	0.00011369
SHOX2	ENSG00000168779.20	short stature homeobox 2	protein_coding	1.4	-1.76	0.0016206	4.00429e-07	0.53	3.48604e-08
GAPDH	ENSG00000111640.15	glyceraldehyde-3-phosphate dehydrogenase	protein_coding	1.4	10.83	5.45555e-19	6.59641e-13	0.75	8.74201e-19
TGFB1	ENSG00000105329.11	transforming growth factor beta 1	protein_coding	1.39	6.56	8.4083e-17	4.6475e-13	0.76	3.41486e-19
MTFR2	ENSG00000146410.12	mitochondrial fission regulator 2	protein_coding	1.39	-0.14	2.96584e-10	7.97131e-11	0.68	3.29059e-14
PTPRR	ENSG00000153233.13	protein tyrosine phosphatase receptor type R	protein_coding	1.38	0.35	7.97931e-09	0.00121156	0.35	0.000835065
PIM2	ENSG00000102096.9	Pim-2 proto-oncogene, serine/threonine kinase	protein_coding	1.38	4.6	2.02073e-09	4.38192e-09	0.61	3.83214e-11
NR5A2	ENSG00000116833.14	nuclear receptor subfamily 5 group A member 2	protein_coding	1.37	2.91	5.87396e-10	4.76748e-10	0.65	8.81648e-13
LPXN	ENSG00000110031.13	leupaxin	protein_coding	1.37	4.19	2.26972e-18	1.27707e-11	0.71	8.48292e-16
TNFRSF10B	ENSG00000120889.13	TNF receptor superfamily member 10b	protein_coding	1.36	6.14	4.94269e-22	3.52328e-14	0.8	1.38053e-22
LMNB1	ENSG00000113368.12	lamin B1	protein_coding	1.35	3.8	1.55419e-10	4.63963e-11	0.69	1.15871e-14
SLC7A11	ENSG00000151012.13	solute carrier family 7 member 11	protein_coding	1.33	1.1	8.21586e-06	1.6143e-09	0.63	7.29519e-12
TNFAIP3	ENSG00000118503.15	TNF alpha induced protein 3	protein_coding	1.29	5.79	5.86484e-12	4.63963e-11	0.69	1.15871e-14
LCK	ENSG00000182866.17	LCK proto-oncogene, Src family tyrosine kinase	protein_coding	1.27	3.64	2.77453e-05	3.26629e-06	0.49	6.06328e-07
CCRL2	ENSG00000121797.10	C-C motif chemokine receptor like 2	protein_coding	1.26	2.24	2.90551e-15	7.02694e-11	0.68	2.58982e-14
HMMR	ENSG00000072571.20	hyaluronan mediated motility receptor	protein_coding	1.25	1.61	2.82329e-06	3.46075e-10	0.66	4.97805e-13
CDK5R1	ENSG00000176749.9	cyclin dependent kinase 5 regulatory subunit 1	protein_coding	1.25	1.68	1.30495e-10	1.43689e-09	0.63	5.98704e-12
CNTNAP1	ENSG00000108797.12	contactin associated protein 1	protein_coding	1.24	2.87	1.35693e-09	1.7594e-08	0.59	3.48368e-10
OR10G2	ENSG00000255582.1	olfactory receptor family 10 subfamily G member 2	protein_coding	1.23	-4.84	0.00302857	0.0252525	0.26	0.023124
NFATC2	ENSG00000101096.20	nuclear factor of activated T cells 2	protein_coding	1.22	4.51	1.13165e-13	7.02694e-11	0.68	2.58982e-14
TAF1D	ENSG00000166012.17	TATA-box binding protein associated factor, RNA polymerase I subunit D	protein_coding	1.21	4.98	1.48613e-17	4.26177e-13	0.76	2.73709e-19
SERPINE2	ENSG00000135919.14	serpin family E member 2	protein_coding	1.2	6.73	3.25345e-06	0.00221834	0.34	0.00165006
LAMP3	ENSG00000078081.8	lysosomal associated membrane protein 3	protein_coding	1.2	2.36	3.42332e-07	5.09382e-09	0.61	4.89854e-11
STEAP3	ENSG00000115107.20	STEAP3 metalloreductase	protein_coding	1.2	4.89	6.08079e-06	0.0289577	0.25	0.0269239
TMEM163	ENSG00000152128.13	transmembrane protein 163	protein_coding	1.2	2.39	1.35789e-07	3.1661e-06	0.49	5.81858e-07
FMNL3	ENSG00000161791.14	formin like 3	protein_coding	1.18	6.01	2.41306e-19	5.86688e-13	0.76	6.40563e-19
ETS1	ENSG00000134954.14	ETS proto-oncogene 1, transcription factor	protein_coding	1.16	7.92	1.08858e-14	1.15354e-10	0.67	6.63113e-14
RASGRP3	ENSG00000152689.18	RAS guanyl releasing protein 3	protein_coding	1.16	5.21	2.4356e-19	4.09435e-13	0.76	2.45721e-19
MCTP2	ENSG00000140563.15	multiple C2 and transmembrane domain containing 2	protein_coding	1.16	4.31	9.46199e-09	3.19396e-10	0.66	4.30851e-13
EDNRA	ENSG00000151617.17	endothelin receptor type A	protein_coding	1.15	4.66	1.57799e-09	8.27831e-08	0.56	3.62717e-09
ANKRD33B	ENSG00000164236.12	ankyrin repeat domain 33B	protein_coding	1.15	6.1	1.91397e-07	1.77776e-05	0.46	5.38884e-06
TCF4	ENSG00000196628.20	transcription factor 4	protein_coding	1.15	6.63	1.0478e-11	4.54937e-09	0.61	4.07482e-11
ASNS	ENSG00000070669.17	asparagine synthetase (glutamine-hydrolyzing)	protein_coding	1.14	-1.4	7.99219e-08	1.61212e-07	0.55	9.57932e-09
TMEM131L	ENSG00000121210.16	transmembrane 131 like	protein_coding	1.14	4.01	2.11449e-17	8.76047e-13	0.75	1.80521e-18
CEBPB	ENSG00000172216.6	CCAAT enhancer binding protein beta	protein_coding	1.13	4.96	8.57068e-07	4.97637e-05	0.43	1.93595e-05
LRP1	ENSG00000123384.14	LDL receptor related protein 1	protein_coding	1.13	8.43	9.48436e-10	1.43689e-09	0.63	5.98704e-12
RALGDS	ENSG00000160271.16	ral guanine nucleotide dissociation stimulator	protein_coding	1.13	1.99	1.01907e-17	5.43826e-13	0.76	5.20997e-19
NRP1	ENSG00000099250.18	neuropilin 1	protein_coding	1.12	8.45	7.06988e-12	2.71599e-10	0.66	3.21658e-13
MARCKS	ENSG00000277443.3	myristoylated alanine rich protein kinase C substrate	protein_coding	1.12	7.32	1.78192e-13	3.42079e-12	0.73	4.68622e-17
EFNA1	ENSG00000169242.12	ephrin A1	protein_coding	1.11	6.48	2.15831e-13	8.27785e-10	0.64	2.32698e-12
FRRS1	ENSG00000156869.14	ferric chelate reductase 1	protein_coding	1.1	3.79	2.88744e-09	1.26166e-07	0.56	6.72142e-09
ST3GAL5	ENSG00000115525.18	ST3 beta-galactoside alpha-2,3-sialyltransferase 5	protein_coding	1.07	3.91	1.94475e-14	1.36073e-10	0.67	9.02425e-14
SHC1	ENSG00000160691.19	SHC adaptor protein 1	protein_coding	1.06	6.51	6.14404e-17	1.92094e-12	0.74	1.22105e-17
JAZF1	ENSG00000153814.13	JAZF zinc finger 1	protein_coding	1.06	4.15	9.24539e-16	1.974e-13	0.77	3.29789e-20
NREP	ENSG00000134986.14	neuronal regeneration related protein	protein_coding	1.06	2.52	9.82137e-11	1.33044e-09	0.63	5.24824e-12
CXCL16	ENSG00000161921.17	C-X-C motif chemokine ligand 16	protein_coding	1.06	6.27	4.39835e-11	8.33502e-09	0.6	1.079e-10
SAMD9L	ENSG00000177409.12	sterile alpha motif domain containing 9 like	protein_coding	1.06	5.57	1.79703e-09	3.94567e-07	0.53	3.41534e-08
PRKCH	ENSG00000027075.15	protein kinase C eta	protein_coding	1.06	5.22	9.00035e-16	3.75359e-10	0.65	5.75413e-13
CSF1	ENSG00000184371.14	colony stimulating factor 1	protein_coding	1.05	5.93	2.73083e-12	8.27785e-10	0.64	2.32698e-12
KCNN4	ENSG00000104783.14	potassium calcium-activated channel subfamily N member 4	protein_coding	1.05	0.89	0.000101075	1.21797e-07	0.56	6.38627e-09
ASAP1	ENSG00000153317.15	ArfGAP with SH3 domain, ankyrin repeat and PH domain 1	protein_coding	1.05	5.77	1.04634e-15	5.86207e-12	0.72	1.56867e-16
REEP4	ENSG00000168476.12	receptor accessory protein 4	protein_coding	1.05	3.51	4.15098e-13	8.7903e-12	0.71	3.83341e-16
TRIM59	ENSG00000213186.8	tripartite motif containing 59	protein_coding	1.05	2.21	6.68255e-12	1.07818e-11	0.71	5.95291e-16
ERBB3	ENSG00000065361.16	erb-b2 receptor tyrosine kinase 3	protein_coding	1.03	7.62	6.64705e-08	1.90944e-06	0.5	2.96829e-07
FGD6	ENSG00000180263.14	FYVE, RhoGEF and PH domain containing 6	protein_coding	1.03	5.04	4.33125e-13	5.7106e-11	0.68	1.73632e-14
GPC6	ENSG00000183098.11	glypican 6	protein_coding	1.03	6	2.03252e-05	2.74795e-05	0.45	9.29474e-06
CCDC127	ENSG00000164366.4	coiled-coil domain containing 127	protein_coding	1.03	5.08	2.09175e-17	9.83797e-14	0.78	4.05925e-21
TFPI	ENSG00000003436.16	tissue factor pathway inhibitor	protein_coding	1.02	7.45	5.84869e-06	1.10133e-06	0.51	1.41237e-07
TNFSF10	ENSG00000121858.11	TNF superfamily member 10	protein_coding	1.02	8.17	2.64408e-07	3.07931e-05	0.44	1.07095e-05
PTPN12	ENSG00000127947.16	protein tyrosine phosphatase non-receptor type 12	protein_coding	1.01	6.55	1.72173e-18	2.5245e-13	0.77	6.54156e-20
GPX8	ENSG00000164294.14	glutathione peroxidase 8 (putative)	protein_coding	0.99	5.18	4.90494e-08	3.91725e-08	0.58	1.18706e-09
EDNRB	ENSG00000136160.17	endothelin receptor type B	protein_coding	0.99	7.26	4.70749e-06	0.000396709	0.38	0.000231346
TPP1	ENSG00000166340.17	tripeptidyl peptidase 1	protein_coding	0.98	8.09	4.71424e-14	8.43639e-12	0.71	3.50723e-16
KIF11	ENSG00000138160.7	kinesin family member 11	protein_coding	0.98	2.96	9.05528e-08	3.0693e-10	0.66	4.00865e-13
SH3GL1	ENSG00000141985.9	SH3 domain containing GRB2 like 1, endophilin A2	protein_coding	0.98	5.86	3.93681e-12	1.32852e-11	0.71	9.23727e-16
PPM1F	ENSG00000100034.14	protein phosphatase, Mg2+/Mn2+ dependent 1F	protein_coding	0.98	5.67	7.03098e-14	7.02694e-11	0.68	2.58982e-14
CXCR5	ENSG00000160683.5	C-X-C motif chemokine receptor 5	protein_coding	0.98	-3.8	0.0268536	0.0160284	0.27	0.0143493
RAPGEF5	ENSG00000136237.19	Rap guanine nucleotide exchange factor 5	protein_coding	0.98	6.02	5.99422e-10	9.52749e-08	0.56	4.46085e-09
B3GNT5	ENSG00000176597.12	UDP-GlcNAc:betaGal beta-1,3-N-acetylglucosaminyltransferase 5	protein_coding	0.97	4.04	5.73285e-07	2.73094e-08	0.58	6.85575e-10
FHOD1	ENSG00000135723.14	formin homology 2 domain containing 1	protein_coding	0.97	4.45	3.94686e-15	3.01952e-12	0.73	3.52371e-17
IL7R	ENSG00000168685.15	interleukin 7 receptor	protein_coding	0.96	4.5	0.0108447	2.05756e-05	0.45	6.47515e-06
HRH4	ENSG00000134489.7	histamine receptor H4	protein_coding	0.96	-3.13	5.52302e-05	2.8267e-05	0.45	9.62317e-06
CPNE2	ENSG00000140848.17	copine 2	protein_coding	0.96	5.56	5.60043e-13	1.15354e-10	0.67	6.63113e-14
CRLF3	ENSG00000176390.12	cytokine receptor like factor 3	protein_coding	0.95	3.53	3.41149e-16	2.13387e-13	0.77	4.13263e-20
EFNB2	ENSG00000125266.8	ephrin B2	protein_coding	0.95	5.38	1.88177e-08	1.8484e-06	0.5	2.84196e-07
STK4	ENSG00000101109.12	serine/threonine kinase 4	protein_coding	0.93	5.62	2.52271e-19	4.43176e-14	0.8	3.01616e-22
CXCR1	ENSG00000163464.8	C-X-C motif chemokine receptor 1	protein_coding	0.93	-0.1	0.00838766	0.000918401	0.36	0.00060926
BCL2	ENSG00000171791.14	BCL2 apoptosis regulator	protein_coding	0.92	6.6	1.01531e-10	8.57967e-08	0.56	3.82251e-09
WWC3	ENSG00000047644.19	WWC family member 3	protein_coding	0.91	6.06	1.86566e-17	1.63881e-13	0.78	1.88006e-20
CMKLR1	ENSG00000174600.14	chemerin chemokine-like receptor 1	protein_coding	0.91	4.54	1.82465e-05	0.000426855	0.38	0.000251943
LIMK1	ENSG00000106683.15	LIM domain kinase 1	protein_coding	0.88	5.1	1.50748e-07	1.82968e-05	0.46	5.58837e-06
TTLL7	ENSG00000137941.17	tubulin tyrosine ligase like 7	protein_coding	0.87	3.08	0.000226735	0.000984638	0.36	0.000659653
ELF4	ENSG00000102034.17	E74 like ETS transcription factor 4	protein_coding	0.86	5.16	2.07395e-14	7.45034e-12	0.72	2.6797e-16
BMP2	ENSG00000125845.7	bone morphogenetic protein 2	protein_coding	0.86	4.27	3.84628e-06	1.08003e-05	0.47	2.86115e-06
H6PD	ENSG00000049239.13	hexose-6-phosphate dehydrogenase/glucose 1-dehydrogenase	protein_coding	0.86	7.03	4.44851e-14	7.6388e-11	0.68	3.03689e-14
DDX60L	ENSG00000181381.14	DExD/H-box 60 like	protein_coding	0.86	4.16	2.81111e-09	6.65991e-09	0.61	7.53235e-11
SHC2	ENSG00000129946.10	SHC adaptor protein 2	protein_coding	0.86	3.79	2.30767e-05	5.88383e-05	0.43	2.37578e-05
TP53INP1	ENSG00000164938.14	tumor protein p53 inducible nuclear protein 1	protein_coding	0.85	5.74	1.75952e-11	2.94945e-10	0.66	3.7282e-13
ATG12	ENSG00000145782.13	autophagy related 12	protein_coding	0.85	4.99	3.08927e-16	2.41728e-13	0.77	5.82714e-20
PPP1R9B	ENSG00000108819.11	protein phosphatase 1 regulatory subunit 9B	protein_coding	0.85	6.09	3.39584e-15	7.15805e-12	0.72	2.45214e-16
NR1H4	ENSG00000012504.15	nuclear receptor subfamily 1 group H member 4	protein_coding	0.85	5.25	4.15022e-07	7.44585e-08	0.56	3.10159e-09
SH3PXD2A	ENSG00000107957.16	SH3 and PX domains 2A	protein_coding	0.84	5.79	4.76673e-10	8.60543e-10	0.64	2.48957e-12
LAMC1	ENSG00000135862.6	laminin subunit gamma 1	protein_coding	0.84	8.4	2.40811e-11	1.67809e-09	0.63	7.78964e-12
DPY19L1	ENSG00000173852.15	dpy-19 like C-mannosyltransferase 1	protein_coding	0.83	5.27	5.27101e-14	3.87577e-12	0.73	6.21902e-17
BCL9L	ENSG00000186174.12	BCL9 like	protein_coding	0.83	5.44	4.29477e-09	6.29828e-10	0.65	1.44071e-12
DUSP1	ENSG00000120129.6	dual specificity phosphatase 1	protein_coding	0.82	9.58	0.000228835	0.00410455	0.32	0.00326836
ABCC1	ENSG00000103222.20	ATP binding cassette subfamily C member 1	protein_coding	0.82	6.17	2.1175e-11	1.88044e-09	0.63	9.45374e-12
IL18	ENSG00000150782.12	interleukin 18	protein_coding	0.81	4.33	1.92452e-05	0.000614104	0.37	0.000383965
BRCA1	ENSG00000012048.23	BRCA1 DNA repair associated	protein_coding	0.8	2.74	2.91209e-09	9.94387e-12	0.71	4.99909e-16
ABL2	ENSG00000143322.21	ABL proto-oncogene 2, non-receptor tyrosine kinase	protein_coding	0.8	5.52	6.57999e-14	1.27707e-11	0.71	8.48292e-16
TSPAN13	ENSG00000106537.8	tetraspanin 13	protein_coding	0.8	4.67	6.29422e-05	0.00145331	0.35	0.001026
CCDC68	ENSG00000166510.14	coiled-coil domain containing 68	protein_coding	0.8	2.66	9.8428e-06	8.38665e-05	0.42	3.65629e-05
AP1S2	ENSG00000182287.15	adaptor related protein complex 1 subunit sigma 2	protein_coding	0.79	4.92	1.18475e-09	1.4773e-10	0.67	1.05132e-13
LPAR4	ENSG00000147145.12	lysophosphatidic acid receptor 4	protein_coding	0.79	-1.87	0.00184989	0.0101838	0.29	0.00881463
SPATS2L	ENSG00000196141.14	spermatogenesis associated serine rich 2 like	protein_coding	0.78	6.84	1.10892e-11	1.12495e-08	0.6	1.73403e-10
CHPF2	ENSG00000033100.16	chondroitin polymerizing factor 2	protein_coding	0.78	5.6	2.13874e-11	5.26135e-11	0.69	1.47943e-14
MYCT1	ENSG00000120279.6	MYC target 1	protein_coding	0.78	4.74	2.06503e-06	0.000856289	0.36	0.000562433
DSEL	ENSG00000171451.14	dermatan sulfate epimerase like	protein_coding	0.78	4.14	0.00114075	0.0494764	0.23	0.0472746
DAPP1	ENSG00000070190.13	dual adaptor of phosphotyrosine and 3-phosphoinositides 1	protein_coding	0.78	2.22	0.00395313	9.84735e-05	0.42	4.43995e-05
DNAJB9	ENSG00000128590.5	DnaJ heat shock protein family (Hsp40) member B9	protein_coding	0.77	6.61	1.628e-07	1.42885e-06	0.51	2.00995e-07
NCOR2	ENSG00000196498.13	nuclear receptor corepressor 2	protein_coding	0.77	7.32	1.15253e-10	1.70315e-11	0.7	1.55102e-15
HTRA1	ENSG00000166033.13	HtrA serine peptidase 1	protein_coding	0.76	7.85	5.81174e-05	0.000121917	0.41	5.73952e-05
FNDC3B	ENSG00000075420.13	fibronectin type III domain containing 3B	protein_coding	0.76	7.35	5.75684e-12	1.36073e-10	0.67	9.02425e-14
ANKRD44	ENSG00000065413.20	ankyrin repeat domain 44	protein_coding	0.76	4.42	2.51383e-08	1.06653e-06	0.52	1.35169e-07
ZEB1	ENSG00000148516.22	zinc finger E-box binding homeobox 1	protein_coding	0.75	5.71	1.08192e-08	3.94567e-07	0.53	3.41534e-08
GALNT2	ENSG00000143641.10	polypeptide N-acetylgalactosaminyltransferase 2	protein_coding	0.75	6.16	3.88997e-07	6.86423e-06	0.48	1.5987e-06
CLEC4D	ENSG00000166527.8	C-type lectin domain family 4 member D	protein_coding	0.75	-1.78	0.0253965	0.00720797	0.3	0.00605846
ZEB2	ENSG00000169554.22	zinc finger E-box binding homeobox 2	protein_coding	0.74	6.55	8.29038e-08	5.03624e-08	0.57	1.7325e-09
MALT1	ENSG00000172175.15	MALT1 paracaspase	protein_coding	0.74	5.78	1.18672e-06	3.62233e-09	0.62	2.8065e-11
TMEM144	ENSG00000164124.11	transmembrane protein 144	protein_coding	0.74	3.79	7.60008e-09	2.63535e-08	0.58	6.48935e-10
NFIA	ENSG00000162599.17	nuclear factor I A	protein_coding	0.72	6.22	4.31578e-12	8.95298e-10	0.64	2.66579e-12
SEC14L2	ENSG00000100003.18	SEC14 like lipid binding 2	protein_coding	0.72	3.25	0.000152385	0.003193	0.32	0.00247594
MBNL1	ENSG00000152601.17	muscleblind like splicing regulator 1	protein_coding	0.71	7.33	1.60497e-14	3.2814e-12	0.73	4.26237e-17
ZC3H11A	ENSG00000058673.17	zinc finger CCCH-type containing 11A	protein_coding	0.71	-3.47	0.00553	0.0012906	0.35	0.000896995
SEMA4C	ENSG00000168758.11	semaphorin 4C	protein_coding	0.71	5.31	2.07229e-08	2.27399e-08	0.59	5.17916e-10
MPZL2	ENSG00000149573.9	myelin protein zero like 2	protein_coding	0.71	5.96	0.000182212	5.70243e-07	0.53	5.71214e-08
CPOX	ENSG00000080819.9	coproporphyrinogen oxidase	protein_coding	0.7	3.55	6.97389e-10	1.02063e-10	0.68	5.26177e-14
RGL1	ENSG00000143344.16	ral guanine nucleotide dissociation stimulator like 1	protein_coding	0.7	6.51	4.24312e-05	5.70973e-06	0.48	1.2596e-06
PCDHB13	ENSG00000187372.11	protocadherin beta 13	protein_coding	0.7	2.53	5.14242e-06	0.000112587	0.41	5.21548e-05
CDH11	ENSG00000140937.14	cadherin 11	protein_coding	0.69	5.47	0.00198122	0.000101154	0.42	4.58598e-05
PRC1	ENSG00000198901.14	protein regulator of cytokinesis 1	protein_coding	0.69	-3.06	0.000145522	5.96758e-05	0.43	2.41693e-05
KRT18	ENSG00000111057.11	keratin 18	protein_coding	0.69	8.1	7.73646e-05	0.00177784	0.34	0.00128757
SYDE1	ENSG00000105137.13	synapse defective Rho GTPase homolog 1	protein_coding	0.69	5.09	3.4475e-09	8.65078e-09	0.6	1.14498e-10
AMOTL1	ENSG00000166025.18	angiomotin like 1	protein_coding	0.69	6.02	2.56801e-06	6.38106e-05	0.43	2.6238e-05
MGST1	ENSG00000008394.13	microsomal glutathione S-transferase 1	protein_coding	0.68	7.19	0.0240204	0.001297	0.35	0.000902162
ITGA10	ENSG00000143127.13	integrin subunit alpha 10	protein_coding	0.68	1.95	0.00219016	0.0179205	0.27	0.0161741
DUSP14	ENSG00000276023.5	dual specificity phosphatase 14	protein_coding	0.68	4.19	1.63953e-08	4.36803e-07	0.53	3.93749e-08
PABPC1	ENSG00000070756.17	poly(A) binding protein cytoplasmic 1	protein_coding	0.67	9.25	1.24294e-13	6.3537e-12	0.72	1.87807e-16
ADAM9	ENSG00000168615.13	ADAM metallopeptidase domain 9	protein_coding	0.67	7.61	3.22981e-08	1.78957e-07	0.55	1.11313e-08
ELOVL7	ENSG00000164181.14	ELOVL fatty acid elongase 7	protein_coding	0.67	6.07	5.57141e-06	0.00181807	0.34	0.00132033
DCBLD2	ENSG00000057019.16	discoidin, CUB and LCCL domain containing 2	protein_coding	0.66	6.39	0.0132774	0.0262046	-0.25	0.0242183
PKD1	ENSG00000008710.20	polycystin 1, transient receptor potential channel interacting	protein_coding	0.66	5.18	7.08711e-06	5.33616e-07	0.53	5.20806e-08
PLXDC2	ENSG00000120594.17	plexin domain containing 2	protein_coding	0.66	7.04	0.00039184	0.00194386	0.34	0.00142322
CST3	ENSG00000101439.9	cystatin C	protein_coding	0.65	8.06	4.42576e-06	4.2047e-05	0.44	1.5741e-05
DDX39B	ENSG00000198563.14	DExD-box helicase 39B	protein_coding	0.65	4.79	5.53408e-06	0.000246068	0.4	0.000132244
PLPP3	ENSG00000162407.9	phospholipid phosphatase 3	protein_coding	0.65	7.85	2.1989e-06	0.000448157	0.38	0.000266668
LHFPL6	ENSG00000183722.9	LHFPL tetraspan subfamily member 6	protein_coding	0.64	6.01	6.99378e-05	3.55013e-05	0.44	1.27728e-05
STX16	ENSG00000124222.22	syntaxin 16	protein_coding	0.63	5.51	7.11699e-14	8.42011e-13	0.75	1.63051e-18
EPDR1	ENSG00000086289.12	ependymin related 1	protein_coding	0.63	5.58	2.45046e-06	3.7537e-05	0.44	1.36879e-05
CCNL2	ENSG00000221978.12	cyclin L2	protein_coding	0.63	5.2	6.15949e-06	0.000333109	0.39	0.000188711
JAG1	ENSG00000101384.12	jagged canonical Notch ligand 1	protein_coding	0.62	7.66	1.79437e-06	3.45013e-05	0.44	1.23309e-05
FLNA	ENSG00000196924.19	filamin A	protein_coding	0.62	9.91	9.22679e-05	1.13785e-06	0.51	1.47646e-07
HKDC1	ENSG00000156510.13	hexokinase domain containing 1	protein_coding	0.62	5.04	0.00355622	0.0062813	0.3	0.00521338
NAV1	ENSG00000134369.15	neuron navigator 1	protein_coding	0.62	5.22	3.6832e-05	7.94628e-05	0.42	3.42486e-05
TRIM52	ENSG00000183718.5	tripartite motif containing 52	protein_coding	0.62	3.41	1.30279e-08	2.46227e-06	0.5	4.16807e-07
ZBED8	ENSG00000221886.4	zinc finger BED-type containing 8	protein_coding	0.62	3.16	7.69613e-07	4.08716e-05	0.44	1.52015e-05
SEC24A	ENSG00000113615.13	SEC24 homolog A, COPII coat complex component	protein_coding	0.61	5.61	2.43939e-09	3.19396e-10	0.66	4.30851e-13
ASCC3	ENSG00000112249.14	activating signal cointegrator 1 complex subunit 3	protein_coding	0.61	5.55	8.86578e-08	9.67763e-07	0.52	1.18342e-07
TUBA1C	ENSG00000167553.16	tubulin alpha 1c	protein_coding	0.61	5.56	2.55364e-05	7.73132e-05	0.42	3.31302e-05
FBN1	ENSG00000166147.14	fibrillin 1	protein_coding	0.6	6.68	0.0053995	6.74075e-05	0.43	2.80481e-05
SOAT1	ENSG00000057252.13	sterol O-acyltransferase 1	protein_coding	0.6	6.28	8.92316e-08	1.25171e-05	0.46	3.45416e-06
STK17B	ENSG00000081320.11	serine/threonine kinase 17b	protein_coding	0.6	5.2	0.000454078	1.45009e-05	0.46	4.16378e-06
SKP2	ENSG00000145604.17	S-phase kinase associated protein 2	protein_coding	0.59	3.27	4.26933e-08	8.27785e-10	0.64	2.32698e-12
PRSS16	ENSG00000112812.16	serine protease 16	protein_coding	0.59	3.73	0.0182073	0.0289577	0.25	0.0269239
TRAFD1	ENSG00000135148.12	TRAF-type zinc finger domain containing 1	protein_coding	0.59	5.41	5.03931e-08	1.17581e-06	0.51	1.54349e-07
PARP12	ENSG00000059378.13	poly(ADP-ribose) polymerase family member 12	protein_coding	0.59	5.17	9.68338e-08	9.67763e-07	0.52	1.18342e-07
SBF1	ENSG00000100241.21	SET binding factor 1	protein_coding	0.59	6.15	2.95531e-05	1.04805e-05	0.47	2.75325e-06
SQSTM1	ENSG00000161011.20	sequestosome 1	protein_coding	0.58	7.72	2.80309e-08	7.19119e-08	0.57	2.945e-09
DERL1	ENSG00000136986.10	derlin 1	protein_coding	0.58	6.59	5.51436e-07	3.51931e-08	0.58	1.00881e-09
RHOJ	ENSG00000126785.13	ras homolog family member J	protein_coding	0.58	4.61	0.00107825	0.000333109	0.39	0.000188711
SEC23A	ENSG00000100934.15	Sec23 homolog A, COPII coat complex component	protein_coding	0.57	6.05	1.42495e-06	1.52346e-06	0.51	2.19197e-07
ST3GAL2	ENSG00000157350.13	ST3 beta-galactoside alpha-2,3-sialyltransferase 2	protein_coding	0.57	5.11	6.34185e-10	2.40606e-10	0.66	2.58052e-13
ARPC3	ENSG00000111229.16	actin related protein 2/3 complex subunit 3	protein_coding	0.56	6.91	1.69328e-08	1.21797e-07	0.56	6.38627e-09
ID2	ENSG00000115738.10	inhibitor of DNA binding 2	protein_coding	0.56	6.97	7.30561e-06	1.63065e-05	0.46	4.83033e-06
BTG1	ENSG00000133639.6	BTG anti-proliferation factor 1	protein_coding	0.56	7.87	6.79957e-07	4.21906e-07	0.53	3.75235e-08
SERPINI1	ENSG00000163536.13	serpin family I member 1	protein_coding	0.56	4.47	0.000775357	0.00370211	0.32	0.00291602
MCFD2	ENSG00000180398.13	multiple coagulation factor deficiency 2, ER cargo receptor complex subunit	protein_coding	0.56	7.53	1.95716e-11	1.18191e-09	0.64	4.29089e-12
OSTM1	ENSG00000081087.15	osteoclastogenesis associated transmembrane protein 1	protein_coding	0.55	5.73	4.94952e-07	1.57343e-06	0.51	2.2894e-07
PAM	ENSG00000145730.20	peptidylglycine alpha-amidating monooxygenase	protein_coding	0.55	8.4	2.40898e-07	1.55847e-07	0.55	9.11913e-09
BLOC1S6	ENSG00000104164.12	biogenesis of lysosomal organelles complex 1 subunit 6	protein_coding	0.54	5.99	1.27824e-10	6.55397e-10	0.65	1.54461e-12
PHF21A	ENSG00000135365.16	PHD finger protein 21A	protein_coding	0.54	5.18	9.00402e-15	1.84651e-12	0.74	1.10893e-17
TIE1	ENSG00000066056.14	tyrosine kinase with immunoglobulin like and EGF like domains 1	protein_coding	0.54	6.2	0.000890769	0.00402298	0.32	0.00319622
TENT5A	ENSG00000112773.16	terminal nucleotidyltransferase 5A	protein_coding	0.54	4.81	5.75937e-05	1.25171e-05	0.46	3.45416e-06
UBE2I	ENSG00000103275.21	ubiquitin conjugating enzyme E2 I	protein_coding	0.53	5.63	2.14033e-10	6.55397e-10	0.65	1.54461e-12
ATL3	ENSG00000184743.13	atlastin GTPase 3	protein_coding	0.53	6.88	3.02e-09	1.6143e-09	0.63	7.29519e-12
LRIG1	ENSG00000144749.14	leucine rich repeats and immunoglobulin like domains 1	protein_coding	0.53	4.81	1.41276e-06	8.61406e-05	0.42	3.77653e-05
ZCCHC2	ENSG00000141664.10	zinc finger CCHC-type containing 2	protein_coding	0.53	4.47	4.33346e-09	3.04573e-08	0.58	8.09739e-10
PEAK1	ENSG00000173517.10	pseudopodium enriched atypical kinase 1	protein_coding	0.53	6.13	6.95949e-06	6.20661e-05	0.43	2.53674e-05
IFFO2	ENSG00000169991.11	intermediate filament family orphan 2	protein_coding	0.53	4.94	0.000415078	0.000856289	0.36	0.000562433
FIGN	ENSG00000182263.14	fidgetin, microtubule severing factor	protein_coding	0.52	3.68	0.00297816	0.00514934	0.31	0.00419366
TBL1XR1	ENSG00000177565.18	TBL1X receptor 1	protein_coding	0.52	7.35	1.0033e-07	1.61212e-07	0.55	9.57932e-09
MAPK7	ENSG00000166484.20	mitogen-activated protein kinase 7	protein_coding	0.51	4.24	7.94874e-07	8.27831e-08	0.56	3.62717e-09
PLCG1	ENSG00000124181.14	phospholipase C gamma 1	protein_coding	0.51	6.08	6.53743e-09	1.6143e-09	0.63	7.29519e-12
NIN	ENSG00000100503.26	ninein	protein_coding	0.51	5.76	1.78696e-05	0.000166984	0.4	8.35819e-05
VMP1	ENSG00000062716.13	vacuole membrane protein 1	protein_coding	0.51	6.85	1.08583e-05	7.12316e-05	0.43	2.99944e-05
ZDHHC20	ENSG00000180776.16	zinc finger DHHC-type palmitoyltransferase 20	protein_coding	0.51	5.69	7.65835e-06	1.08395e-08	0.6	1.63532e-10
PCBP1	ENSG00000169564.7	poly(rC) binding protein 1	protein_coding	0.5	2.42	0.00109784	0.00138971	0.35	0.000975348
MED13L	ENSG00000123066.9	mediator complex subunit 13L	protein_coding	0.5	6.9	4.86812e-06	3.55013e-05	0.44	1.27728e-05
CBL	ENSG00000110395.7	Cbl proto-oncogene	protein_coding	0.5	5.66	2.26489e-07	2.36324e-07	0.54	1.65561e-08
ZFP69B	ENSG00000187801.15	ZFP69 zinc finger protein B	protein_coding	0.5	0.38	0.000184505	2.46227e-06	0.5	4.16807e-07
NT5E	ENSG00000135318.12	5'-nucleotidase ecto	protein_coding	0.49	5.12	0.0458019	0.00287536	0.33	0.00220349
LGALSL	ENSG00000119862.13	galectin like	protein_coding	0.49	4.74	2.73423e-05	0.00126696	0.35	0.000878666
ATP13A3	ENSG00000133657.16	ATPase 13A3	protein_coding	0.49	7.64	4.34217e-05	0.000101154	0.42	4.58598e-05
CLCC1	ENSG00000121940.16	chloride channel CLIC like 1	protein_coding	0.49	4.4	1.10356e-10	1.4935e-09	0.63	6.39441e-12
CTSB	ENSG00000164733.22	cathepsin B	protein_coding	0.49	10.31	0.00599091	0.00402298	0.32	0.00319622
CDKN1B	ENSG00000111276.11	cyclin dependent kinase inhibitor 1B	protein_coding	0.48	6.12	8.82145e-09	7.4455e-07	0.52	8.25583e-08
ECE1	ENSG00000117298.16	endothelin converting enzyme 1	protein_coding	0.48	7.54	7.38603e-06	3.7537e-05	0.44	1.36879e-05
YWHAG	ENSG00000170027.7	tyrosine 3-monooxygenase/tryptophan 5-monooxygenase activation protein gamma	protein_coding	0.48	7.78	1.68002e-08	8.0266e-09	0.6	1.0162e-10
TJAP1	ENSG00000137221.14	tight junction associated protein 1	protein_coding	0.47	4.54	3.32744e-09	2.21857e-10	0.66	2.22557e-13
CLIC4	ENSG00000169504.15	chloride intracellular channel 4	protein_coding	0.47	9.39	0.0042743	0.0170427	0.27	0.0153267
HSPA13	ENSG00000155304.6	heat shock protein family A (Hsp70) member 13	protein_coding	0.47	5.87	2.78694e-06	3.06667e-06	0.49	5.57928e-07
SYVN1	ENSG00000162298.19	synoviolin 1	protein_coding	0.47	6.11	2.47313e-08	2.77535e-09	0.62	1.80661e-11
TIFA	ENSG00000145365.11	TRAF interacting protein with forkhead associated domain	protein_coding	0.47	3.72	0.000628821	0.000205547	0.4	0.000106941
CASP2	ENSG00000106144.20	caspase 2	protein_coding	0.46	5.13	2.69132e-09	9.70157e-10	0.64	3.05941e-12
TPD52L2	ENSG00000101150.18	TPD52 like 2	protein_coding	0.46	6.68	5.66046e-10	2.13303e-10	0.66	2.06896e-13
S100PBP	ENSG00000116497.18	S100P binding protein	protein_coding	0.46	4.23	1.57694e-08	1.02144e-07	0.56	4.94153e-09
MSN	ENSG00000147065.17	moesin	protein_coding	0.45	9.71	2.51377e-08	2.93981e-08	0.58	7.66842e-10
EIF4B	ENSG00000063046.18	eukaryotic translation initiation factor 4B	protein_coding	0.44	8.76	5.4821e-07	1.18048e-05	0.47	3.20522e-06
FAM118A	ENSG00000100376.12	family with sequence similarity 118 member A	protein_coding	0.44	3.3	3.99033e-05	0.000239913	0.4	0.000128331
YIPF5	ENSG00000145817.17	Yip1 domain family member 5	protein_coding	0.44	6.1	8.54498e-08	1.91972e-07	0.55	1.23063e-08
DIXDC1	ENSG00000150764.14	DIX domain containing 1	protein_coding	0.44	5.95	0.000752773	0.0367875	0.24	0.0346337
AP1G2	ENSG00000213983.12	adaptor related protein complex 1 subunit gamma 2	protein_coding	0.44	3.26	0.000583864	0.00126696	0.35	0.000878666
CDCA4	ENSG00000170779.11	cell division cycle associated 4	protein_coding	0.43	2.26	4.0977e-05	5.53318e-06	0.48	1.20936e-06
MAMLD1	ENSG00000013619.14	mastermind like domain containing 1	protein_coding	0.43	2.86	0.00182401	0.0038587	0.32	0.00305304
SEPTIN7	ENSG00000122545.20	septin 7	protein_coding	0.43	7.44	4.41632e-07	7.71454e-08	0.56	3.26838e-09
FBXO45	ENSG00000174013.8	F-box protein 45	protein_coding	0.43	3.78	1.87063e-06	1.91972e-07	0.55	1.23063e-08
TBK1	ENSG00000183735.11	TANK binding kinase 1	protein_coding	0.42	4.76	2.66207e-08	5.1576e-10	0.65	1.01422e-12
PTTG1IP	ENSG00000183255.12	PTTG1 interacting protein	protein_coding	0.42	9.07	0.00016824	3.35542e-05	0.44	1.19115e-05
KBTBD11	ENSG00000176595.4	kelch repeat and BTB domain containing 11	protein_coding	0.42	6.79	0.00903786	0.0145031	0.28	0.0128946
ARL6IP5	ENSG00000144746.7	ADP ribosylation factor like GTPase 6 interacting protein 5	protein_coding	0.42	7.48	6.02212e-06	7.07864e-06	0.48	1.66336e-06
CNIH4	ENSG00000143771.12	cornichon family AMPA receptor auxiliary protein 4	protein_coding	0.42	5.54	6.23171e-08	2.2386e-06	0.5	3.67193e-07
MTDH	ENSG00000147649.10	metadherin	protein_coding	0.41	7.32	1.27061e-07	3.62233e-09	0.62	2.8065e-11
JARID2	ENSG00000008083.14	jumonji and AT-rich interaction domain containing 2	protein_coding	0.41	4.27	2.21022e-06	3.06667e-06	0.49	5.57928e-07
PLD1	ENSG00000075651.16	phospholipase D1	protein_coding	0.41	5.34	0.0230074	0.00779766	0.3	0.00659824
RSU1	ENSG00000148484.18	Ras suppressor protein 1	protein_coding	0.41	6.56	1.14604e-08	1.26166e-07	0.56	6.72142e-09
XPOT	ENSG00000184575.12	exportin for tRNA	protein_coding	0.41	6.25	1.91883e-06	3.45013e-05	0.44	1.23309e-05
ZNF121	ENSG00000197961.12	zinc finger protein 121	protein_coding	0.41	3.97	4.32803e-05	0.000154345	0.41	7.61092e-05
KRBOX4	ENSG00000147121.16	KRAB box domain containing 4	protein_coding	0.41	3.3	1.29972e-07	5.40996e-08	0.57	1.92832e-09
QKI	ENSG00000112531.17	QKI, KH domain containing RNA binding	protein_coding	0.4	7.35	1.45334e-05	1.67828e-05	0.46	5.01027e-06
PHF14	ENSG00000106443.17	PHD finger protein 14	protein_coding	0.4	5.22	1.38335e-07	3.81436e-07	0.53	3.25691e-08
POLR3G	ENSG00000113356.13	RNA polymerase III subunit G	protein_coding	0.4	0.82	0.0100348	0.000154345	0.41	7.61092e-05
CREG1	ENSG00000143162.9	cellular repressor of E1A stimulated genes 1	protein_coding	0.4	7.4	0.00011409	0.000205547	0.4	0.000106941
OSBPL5	ENSG00000021762.20	oxysterol binding protein like 5	protein_coding	0.4	4.77	0.00487507	0.00981587	0.29	0.00847014
ABT1	ENSG00000146109.5	activator of basal transcription 1	protein_coding	0.39	4.47	2.20818e-09	1.57263e-08	0.59	2.92858e-10
PCSK5	ENSG00000099139.14	proprotein convertase subtilisin/kexin type 5	protein_coding	0.39	4.44	0.0225249	0.0289577	0.25	0.0269239
POMK	ENSG00000185900.11	protein O-mannose kinase	protein_coding	0.39	4.36	1.20461e-05	4.67027e-07	0.53	4.32402e-08
CRTAP	ENSG00000170275.15	cartilage associated protein	protein_coding	0.38	7.76	6.38092e-07	6.25595e-06	0.48	1.41833e-06
UBA6	ENSG00000033178.13	ubiquitin like modifier activating enzyme 6	protein_coding	0.38	5.39	2.91031e-05	1.06653e-06	0.52	1.35169e-07
RBAK	ENSG00000146587.18	RB associated KRAB zinc finger	protein_coding	0.38	4.41	6.20442e-05	1.36679e-05	0.46	3.86338e-06
RHBDF1	ENSG00000007384.15	rhomboid 5 homolog 1	protein_coding	0.38	4.34	0.00452987	0.00876651	0.29	0.00749281
YPEL3	ENSG00000090238.12	yippee like 3	protein_coding	0.38	5.44	0.000320648	0.000142779	0.41	6.93282e-05
LMAN1	ENSG00000074695.6	lectin, mannose binding 1	protein_coding	0.37	8.15	9.46114e-05	0.000836121	0.36	0.000547298
MAP7D1	ENSG00000116871.15	MAP7 domain containing 1	protein_coding	0.37	6.09	0.000254909	0.000139114	0.41	6.72188e-05
GRPEL2	ENSG00000164284.15	GrpE like 2, mitochondrial	protein_coding	0.37	4.39	1.91082e-06	2.71124e-07	0.54	2.01252e-08
BTAF1	ENSG00000095564.14	B-TFIID TATA-box binding protein associated factor 1	protein_coding	0.37	5.13	7.37753e-05	0.000494513	0.38	0.000298851
DENND4B	ENSG00000198837.10	DENN domain containing 4B	protein_coding	0.37	5.11	8.55177e-07	2.90341e-07	0.54	2.21752e-08
KDSR	ENSG00000119537.18	3-ketodihydrosphingosine reductase	protein_coding	0.36	6.64	6.36874e-05	0.000406221	0.38	0.000237874
CNOT11	ENSG00000158435.8	CCR4-NOT transcription complex subunit 11	protein_coding	0.36	5.69	3.13948e-05	2.31061e-05	0.45	7.48707e-06
DOCK5	ENSG00000147459.18	dedicator of cytokinesis 5	protein_coding	0.36	4.89	0.0029542	0.000984638	0.36	0.000659653
TMEM123	ENSG00000152558.15	transmembrane protein 123	protein_coding	0.36	8.39	0.00026267	0.000216476	0.4	0.00011369
RIC1	ENSG00000107036.12	RIC1 homolog, RAB6A GEF complex partner 1	protein_coding	0.36	4.93	7.4644e-05	0.000139114	0.41	6.72188e-05
CDK2	ENSG00000123374.11	cyclin dependent kinase 2	protein_coding	0.35	3.83	0.000154235	6.45397e-06	0.48	1.47648e-06
ASPH	ENSG00000198363.18	aspartate beta-hydroxylase	protein_coding	0.35	7.55	0.000576763	9.08877e-05	0.42	4.0295e-05
NUP58	ENSG00000139496.16	nucleoporin 58	protein_coding	0.35	5.72	2.48402e-05	6.92832e-05	0.43	2.90024e-05
KLHL20	ENSG00000076321.11	kelch like family member 20	protein_coding	0.34	4.5	2.18883e-05	1.11201e-05	0.47	2.97e-06
RPS6KB1	ENSG00000108443.14	ribosomal protein S6 kinase B1	protein_coding	0.34	4.87	3.50797e-07	3.60744e-10	0.66	5.35724e-13
DENND5B	ENSG00000170456.16	DENN domain containing 5B	protein_coding	0.34	5.04	0.0260707	0.0228809	0.26	0.0209793
RBMS2	ENSG00000076067.13	RNA binding motif single stranded interacting protein 2	protein_coding	0.34	6.41	0.000435388	0.00135812	0.35	0.000950349
PAN2	ENSG00000135473.15	poly(A) specific ribonuclease subunit PAN2	protein_coding	0.34	4.76	0.000368769	0.00181807	0.34	0.00132033
ATF7IP	ENSG00000171681.12	activating transcription factor 7 interacting protein	protein_coding	0.34	6.71	7.61138e-05	1.40804e-05	0.46	4.01129e-06
B4GAT1	ENSG00000174684.7	beta-1,4-glucuronyltransferase 1	protein_coding	0.34	5.93	0.000126387	0.00115682	0.35	0.000792334
NRBP1	ENSG00000115216.14	nuclear receptor binding protein 1	protein_coding	0.33	6.53	6.49938e-07	3.00347e-07	0.54	2.32666e-08
TRIM56	ENSG00000169871.13	tripartite motif containing 56	protein_coding	0.33	6.69	0.000256173	0.000586057	0.37	0.000363737
FBXW7	ENSG00000109670.16	F-box and WD repeat domain containing 7	protein_coding	0.33	3.97	9.82968e-06	1.0166e-05	0.47	2.64871e-06
ATP2A2	ENSG00000174437.17	ATPase sarcoplasmic/endoplasmic reticulum Ca2+ transporting 2	protein_coding	0.33	8.19	7.27142e-06	3.7537e-05	0.44	1.36879e-05
DCTN6	ENSG00000104671.8	dynactin subunit 6	protein_coding	0.33	4.36	9.72435e-05	0.000798281	0.36	0.000519012
NRBF2	ENSG00000148572.16	nuclear receptor binding factor 2	protein_coding	0.33	4.12	4.61749e-05	4.97637e-05	0.43	1.93595e-05
FKBP14	ENSG00000106080.11	FKBP prolyl isomerase 14	protein_coding	0.33	3.8	0.0152928	0.00749288	0.3	0.00631942
GDI2	ENSG00000057608.17	GDP dissociation inhibitor 2	protein_coding	0.33	8.04	1.13411e-05	1.11201e-05	0.47	2.97e-06
PSMB4	ENSG00000159377.11	proteasome 20S subunit beta 4	protein_coding	0.33	7.37	0.000377585	0.000691909	0.37	0.000440523
E2F3	ENSG00000112242.15	E2F transcription factor 3	protein_coding	0.32	4.18	0.0114509	0.0111865	0.28	0.00975511
SRP72	ENSG00000174780.17	signal recognition particle 72	protein_coding	0.32	6.67	7.37557e-07	9.86379e-08	0.56	4.69467e-09
CCDC43	ENSG00000180329.14	coiled-coil domain containing 43	protein_coding	0.32	3.86	3.38354e-06	4.32627e-06	0.49	8.77142e-07
FAM220A	ENSG00000178397.13	family with sequence similarity 220 member A	protein_coding	0.32	3.95	5.79627e-06	1.77776e-05	0.46	5.38884e-06
CWC15	ENSG00000150316.12	CWC15 spliceosome associated protein homolog	protein_coding	0.32	5.63	2.271e-06	1.88473e-05	0.46	5.80005e-06
GAN	ENSG00000261609.8	gigaxonin	protein_coding	0.32	2.96	0.000566521	0.00021096	0.4	0.000110259
SP1	ENSG00000185591.10	Sp1 transcription factor	protein_coding	0.31	7.25	5.70677e-06	3.3692e-06	0.49	6.31646e-07
GABPB1	ENSG00000104064.18	GA binding protein transcription factor subunit beta 1	protein_coding	0.31	3.8	4.16766e-05	1.47582e-06	0.51	2.09965e-07
NMD3	ENSG00000169251.13	NMD3 ribosome export adaptor	protein_coding	0.31	6	0.000585863	0.000482631	0.38	0.00029058
UBE2Z	ENSG00000159202.18	ubiquitin conjugating enzyme E2 Z	protein_coding	0.31	7.08	1.44839e-07	1.66928e-07	0.55	1.0072e-08
RHPN2	ENSG00000131941.8	rhophilin Rho GTPase binding protein 2	protein_coding	0.31	5.65	0.00548574	0.0266489	0.25	0.0246532
ARPC2	ENSG00000163466.16	actin related protein 2/3 complex subunit 2	protein_coding	0.31	7.68	5.60456e-05	2.18135e-05	0.45	6.96655e-06
SLC22A5	ENSG00000197375.13	solute carrier family 22 member 5	protein_coding	0.3	6.33	0.0496835	0.0224955	0.26	0.0206031
RASA2	ENSG00000155903.13	RAS p21 protein activator 2	protein_coding	0.3	4.18	0.00501405	0.000233817	0.4	0.000124517
ZNF43	ENSG00000198521.12	zinc finger protein 43	protein_coding	0.3	4.31	0.00335752	0.0240812	0.26	0.0221472
GOLT1B	ENSG00000111711.10	golgi transport 1B	protein_coding	0.29	5.38	0.00597056	0.00893171	0.29	0.00764634
COA4	ENSG00000181924.7	cytochrome c oxidase assembly factor 4 homolog	protein_coding	0.29	5.41	0.00110361	0.000961784	0.36	0.00064229
GIGYF1	ENSG00000146830.11	GRB10 interacting GYF protein 1	protein_coding	0.29	5.55	0.00360018	0.00893171	0.29	0.00764634
PHC2	ENSG00000134686.18	polyhomeotic homolog 2	protein_coding	0.28	7.35	0.00179988	0.000644107	0.37	0.000405642
IQCB1	ENSG00000173226.17	IQ motif containing B1	protein_coding	0.28	4.01	0.00205428	0.0019007	0.34	0.00138788
ZC3H4	ENSG00000130749.10	zinc finger CCCH-type containing 4	protein_coding	0.28	5.41	0.000176521	0.00050664	0.38	0.000307318
NUP160	ENSG00000030066.13	nucleoporin 160	protein_coding	0.28	5.95	0.000298367	0.00155536	0.35	0.00110768
SPOPL	ENSG00000144228.9	speckle type BTB/POZ protein like	protein_coding	0.28	5.19	0.00648103	0.00162739	0.34	0.00116559
MAP3K5	ENSG00000197442.10	mitogen-activated protein kinase kinase kinase 5	protein_coding	0.28	5.22	0.0179588	0.0069261	0.3	0.00580115
NSD2	ENSG00000109685.19	nuclear receptor binding SET domain protein 2	protein_coding	0.28	5.39	0.00117634	0.00118358	0.35	0.000813285
CRKL	ENSG00000099942.13	CRK like proto-oncogene, adaptor protein	protein_coding	0.27	6.47	1.35754e-06	4.98981e-07	0.53	4.74388e-08
ARHGDIA	ENSG00000141522.12	Rho GDP dissociation inhibitor alpha	protein_coding	0.27	7.02	0.00204624	2.37776e-05	0.45	7.76124e-06
LPP	ENSG00000145012.13	LIM domain containing preferred translocation partner in lipoma	protein_coding	0.27	7.66	0.00958305	0.0035495	0.32	0.00278362
BDP1	ENSG00000145734.19	B double prime 1, subunit of RNA polymerase III transcription initiation factor IIIB	protein_coding	0.27	5.43	0.0125176	0.0127524	0.28	0.0112316
USP31	ENSG00000103404.14	ubiquitin specific peptidase 31	protein_coding	0.27	4.14	0.00176021	0.00162739	0.34	0.00116559
LGALS8	ENSG00000116977.19	galectin 8	protein_coding	0.27	5.8	0.000418577	0.000518936	0.38	0.000316095
VIRMA	ENSG00000164944.12	vir like m6A methyltransferase associated	protein_coding	0.27	6.04	0.000160452	0.000112587	0.41	5.21548e-05
MXD4	ENSG00000123933.17	MAX dimerization protein 4	protein_coding	0.26	6.65	0.0301823	0.0266489	0.25	0.0246532
FUS	ENSG00000089280.19	FUS RNA binding protein	protein_coding	0.26	7.57	0.00169254	0.000761487	0.37	0.000491652
COPS2	ENSG00000166200.15	COP9 signalosome subunit 2	protein_coding	0.26	6.41	0.00171151	0.00402298	0.32	0.00319622
TSPAN9	ENSG00000011105.14	tetraspanin 9	protein_coding	0.26	7.51	0.0270391	0.0132231	0.28	0.0116782
ENDOD1	ENSG00000149218.5	endonuclease domain containing 1	protein_coding	0.25	6.7	0.0102429	0.00603296	0.3	0.00498782
AGO2	ENSG00000123908.12	argonaute RISC catalytic component 2	protein_coding	0.25	5.39	0.0191393	0.0472511	0.23	0.0450523
CDK13	ENSG00000065883.16	cyclin dependent kinase 13	protein_coding	0.25	5.82	0.000101836	9.33276e-05	0.42	4.1612e-05
M6PR	ENSG00000003056.8	mannose-6-phosphate receptor, cation dependent	protein_coding	0.24	6.39	0.00630036	0.00242239	0.33	0.00182043
BAZ2A	ENSG00000076108.12	bromodomain adjacent to zinc finger domain 2A	protein_coding	0.24	6.98	0.00556362	0.00445792	0.31	0.00357943
FNBP4	ENSG00000109920.13	formin binding protein 4	protein_coding	0.24	5.26	0.0135853	0.0397851	0.24	0.0376292
MFSD8	ENSG00000164073.11	major facilitator superfamily domain containing 8	protein_coding	0.23	4.27	0.00687006	0.0101838	0.29	0.00881463
STYX	ENSG00000198252.12	serine/threonine/tyrosine interacting protein	protein_coding	0.23	4.51	0.0122815	0.0150401	0.27	0.0134064
HELZ	ENSG00000198265.12	helicase with zinc finger	protein_coding	0.23	5.95	0.00384382	0.0059176	0.31	0.00488455
MORC3	ENSG00000159256.13	MORC family CW-type zinc finger 3	protein_coding	0.23	5.13	0.00626452	0.000876678	0.36	0.000577762
NOL8	ENSG00000198000.12	nucleolar protein 8	protein_coding	0.23	4.75	0.0019466	0.000897343	0.36	0.000593357
CFAP97	ENSG00000164323.14	cilia and flagella associated protein 97	protein_coding	0.23	6	0.0153779	0.01991	0.26	0.0180944
DNAJC3	ENSG00000102580.15	DnaJ heat shock protein family (Hsp40) member C3	protein_coding	0.21	7.19	0.00934792	0.00185879	0.34	0.00135367
PPP3CA	ENSG00000138814.17	protein phosphatase 3 catalytic subunit alpha	protein_coding	0.21	5.53	0.015157	0.0367875	0.24	0.0346337
PURB	ENSG00000146676.10	purine rich element binding protein B	protein_coding	0.21	6.32	0.00870291	0.00410455	0.32	0.00326836
HNRNPH1	ENSG00000169045.17	heterogeneous nuclear ribonucleoprotein H1	protein_coding	0.2	7.58	0.0103721	0.0334377	0.24	0.0313289
PAIP2	ENSG00000120727.13	poly(A) binding protein interacting protein 2	protein_coding	0.2	5.59	0.0018363	0.00795187	0.3	0.00674039
ELK4	ENSG00000158711.14	ETS transcription factor ELK4	protein_coding	0.2	6.17	0.0314008	0.0494764	0.23	0.0472746
C6orf62	ENSG00000112308.13	chromosome 6 open reading frame 62	protein_coding	0.19	7.24	0.0155163	0.00198779	0.34	0.00145938
TAF12	ENSG00000120656.12	TATA-box binding protein associated factor 12	protein_coding	0.18	4.13	0.015566	0.0236826	0.26	0.0217548
WDR3	ENSG00000065183.16	WD repeat domain 3	protein_coding	0.18	4.99	0.0206898	0.0111865	0.28	0.00975511
SREK1IP1	ENSG00000153006.16	SREK1 interacting protein 1	protein_coding	0.18	5.15	0.0164175	0.00981587	0.29	0.00847014
RBM27	ENSG00000091009.8	RNA binding motif protein 27	protein_coding	0.18	4.55	0.0365954	0.0262046	0.25	0.0242183
HNRNPD	ENSG00000138668.19	heterogeneous nuclear ribonucleoprotein D	protein_coding	0.17	7.29	0.013809	0.0103768	0.29	0.00899337
CCDC117	ENSG00000159873.10	coiled-coil domain containing 117	protein_coding	0.17	4.88	0.0340482	0.0100052	0.29	0.00863313
BAG6	ENSG00000204463.13	BAG cochaperone 6	protein_coding	0.16	7.68	0.0393747	0.00706653	0.3	0.00592759
SNX1	ENSG00000028528.15	sorting nexin 1	protein_coding	-0.13	7.05	0.0329723	0.00666012	-0.3	0.00555672
CELF1	ENSG00000149187.18	CUGBP Elav-like family member 1	protein_coding	-0.14	6.77	0.0172262	0.00242239	-0.33	0.00182043
ARPP19	ENSG00000128989.11	cAMP regulated phosphoprotein 19	protein_coding	-0.14	7.73	0.0481442	0.00653172	-0.3	0.00544128
H2AZ2	ENSG00000105968.19	H2A,Z variant histone 2	protein_coding	-0.15	7.59	0.0120804	0.000341521	-0.39	0.000194282
RAB7A	ENSG00000075785.14	RAB7A, member RAS oncogene family	protein_coding	-0.16	8.12	0.021145	0.00826992	-0.29	0.0070334
KRR1	ENSG00000111615.14	KRR1 small subunit processome component homolog	protein_coding	-0.16	5.02	0.028937	0.000252335	-0.39	0.000136228
PDCD10	ENSG00000114209.15	programmed cell death 10	protein_coding	-0.17	4.91	0.0451213	0.00706653	-0.3	0.00592759
CAPRIN2	ENSG00000110888.17	caprin family member 2	protein_coding	-0.17	3.91	0.0435087	0.00252858	-0.33	0.00190975
HNRNPU	ENSG00000153187.20	heterogeneous nuclear ribonucleoprotein U	protein_coding	-0.17	8.8	0.0174675	0.00474471	-0.31	0.00383353
ZNF652	ENSG00000198740.9	zinc finger protein 652	protein_coding	-0.17	5.17	0.0309836	0.0034767	-0.32	0.00272043
ANKRD42	ENSG00000137494.14	ankyrin repeat domain 42	protein_coding	-0.17	4.32	0.00867888	0.00484112	-0.31	0.00391873
ERBIN	ENSG00000112851.15	erbb2 interacting protein	protein_coding	-0.18	7.07	0.0104059	0.000333109	-0.39	0.000188711
CD59	ENSG00000085063.17	CD59 molecule (CD59 blood group)	protein_coding	-0.18	9.03	0.0235582	0.00333306	-0.32	0.00259627
WDR37	ENSG00000047056.16	WD repeat domain 37	protein_coding	-0.19	4.76	0.0237869	0.0244798	-0.26	0.0225389
DNAJB6	ENSG00000105993.15	DnaJ heat shock protein family (Hsp40) member B6	protein_coding	-0.19	6.3	0.00901238	0.000358666	-0.39	0.000205769
BRD7	ENSG00000166164.16	bromodomain containing 7	protein_coding	-0.19	5.84	0.000466137	2.99332e-05	-0.45	1.03388e-05
SFPQ	ENSG00000116560.11	splicing factor proline and glutamine rich	protein_coding	-0.19	7.53	0.00225133	0.00281574	-0.33	0.00215277
RAD21	ENSG00000164754.15	RAD21 cohesin complex component	protein_coding	-0.19	7.26	0.0070819	1.10133e-06	-0.51	1.41237e-07
NSF	ENSG00000073969.18	N-ethylmaleimide sensitive factor, vesicle fusing ATPase	protein_coding	-0.19	5.44	0.00977336	0.0189069	-0.27	0.0171229
EIF3J	ENSG00000104131.13	eukaryotic translation initiation factor 3 subunit J	protein_coding	-0.19	5.87	0.00811003	0.000341521	-0.39	0.000194282
EIF4E2	ENSG00000135930.14	eukaryotic translation initiation factor 4E family member 2	protein_coding	-0.19	5.97	0.00900723	0.00720797	-0.3	0.00605846
PACRGL	ENSG00000163138.19	parkin coregulated like	protein_coding	-0.19	3.45	0.0201654	0.00615582	-0.3	0.00510012
PRKRA	ENSG00000180228.14	protein activator of interferon induced protein kinase EIF2AK2	protein_coding	-0.19	4.51	0.00287554	1.67828e-05	-0.46	5.01027e-06
SENP6	ENSG00000112701.18	SUMO specific peptidase 6	protein_coding	-0.19	6.25	0.0309781	0.000162608	-0.41	8.09894e-05
ENSA	ENSG00000143420.19	endosulfine alpha	protein_coding	-0.19	7.16	0.000289317	4.83833e-05	-0.43	1.87023e-05
KIFBP	ENSG00000198954.9	kinesin family binding protein	protein_coding	-0.19	5.2	0.0146775	0.00306545	-0.33	0.0023656
MED13	ENSG00000108510.10	mediator complex subunit 13	protein_coding	-0.2	6.66	0.0356015	0.00679341	-0.3	0.00567994
USP33	ENSG00000077254.14	ubiquitin specific peptidase 33	protein_coding	-0.2	6.26	0.00724584	0.000494513	-0.38	0.000298851
ARL6IP1	ENSG00000170540.15	ADP ribosylation factor like GTPase 6 interacting protein 1	protein_coding	-0.2	7.61	0.0391489	0.017352	-0.27	0.0156241
LMBR1	ENSG00000105983.22	limb development membrane protein 1	protein_coding	-0.2	5.93	0.0134803	0.000817159	-0.36	0.000533071
ZYG11B	ENSG00000162378.13	zyg-11 family member B, cell cycle regulator	protein_coding	-0.2	6.11	0.0488554	0.00615582	-0.3	0.00510012
REPS1	ENSG00000135597.19	RALBP1 associated Eps domain containing 1	protein_coding	-0.2	4.8	0.0031283	0.000691909	-0.37	0.000440523
ATRX	ENSG00000085224.23	ATRX chromatin remodeler	protein_coding	-0.21	6.82	0.0348703	0.00944895	-0.29	0.00812816
ZNF621	ENSG00000172888.12	zinc finger protein 621	protein_coding	-0.21	4.63	0.0247174	0.00484112	-0.31	0.00391873
ZBTB5	ENSG00000168795.5	zinc finger and BTB domain containing 5	protein_coding	-0.21	4.41	0.0122008	0.00536014	-0.31	0.00438243
CBX5	ENSG00000094916.16	chromobox 5	protein_coding	-0.21	7.64	0.0348414	0.0423664	-0.23	0.0401932
HIPK1	ENSG00000163349.22	homeodomain interacting protein kinase 1	protein_coding	-0.21	6.75	0.00787557	0.00735077	-0.3	0.00618855
ZC3H13	ENSG00000123200.17	zinc finger CCCH-type containing 13	protein_coding	-0.21	6.49	0.0243033	0.0161524	-0.27	0.0144712
SUZ12	ENSG00000178691.11	SUZ12 polycomb repressive complex 2 subunit	protein_coding	-0.22	5.47	0.00971701	1.63065e-05	-0.46	4.83033e-06
AKAP11	ENSG00000023516.9	A-kinase anchoring protein 11	protein_coding	-0.22	6.59	0.038885	0.0170427	-0.27	0.0153267
SLC25A36	ENSG00000114120.14	solute carrier family 25 member 36	protein_coding	-0.22	6.4	0.0279544	0.00212231	-0.34	0.00157054
STRN3	ENSG00000196792.12	striatin 3	protein_coding	-0.22	5.05	0.01276	0.00185879	-0.34	0.00135367
AZIN1	ENSG00000155096.14	antizyme inhibitor 1	protein_coding	-0.23	6.95	0.00366243	0.000154345	-0.41	7.61092e-05
ZSCAN16	ENSG00000196812.5	zinc finger and SCAN domain containing 16	protein_coding	-0.23	1.3	0.0147658	0.000798281	-0.36	0.000519012
ARHGAP12	ENSG00000165322.18	Rho GTPase activating protein 12	protein_coding	-0.23	5.63	0.00971701	2.82793e-05	-0.45	9.63257e-06
THNSL1	ENSG00000185875.13	threonine synthase like 1	protein_coding	-0.23	4.2	0.0305162	0.0122904	-0.28	0.0107945
RYK	ENSG00000163785.13	receptor like tyrosine kinase	protein_coding	-0.24	5.68	0.00574373	0.00514934	-0.31	0.00419366
DLG1	ENSG00000075711.21	discs large MAGUK scaffold protein 1	protein_coding	-0.24	6.34	0.00435864	4.60057e-06	-0.49	9.50726e-07
PPP1CB	ENSG00000213639.10	protein phosphatase 1 catalytic subunit beta	protein_coding	-0.24	8.13	0.0179829	0.0248913	-0.26	0.02294
SKP1	ENSG00000113558.19	S-phase kinase associated protein 1	protein_coding	-0.24	7.75	0.000369896	7.94628e-05	-0.42	3.42486e-05
SMAD2	ENSG00000175387.16	SMAD family member 2	protein_coding	-0.25	6.49	0.000205047	6.92832e-05	-0.43	2.90024e-05
UBE2G1	ENSG00000132388.12	ubiquitin conjugating enzyme E2 G1	protein_coding	-0.25	5.6	0.000426836	1.18048e-05	-0.47	3.20522e-06
EVI5	ENSG00000067208.14	ecotropic viral integration site 5	protein_coding	-0.25	4.5	0.00280291	8.1643e-05	-0.42	3.53908e-05
CXXC5	ENSG00000171604.12	CXXC finger protein 5	protein_coding	-0.25	7.06	0.0203679	0.00525215	-0.31	0.00428602
RMND5A	ENSG00000153561.13	required for meiotic nuclear division 5 homolog A	protein_coding	-0.25	6.48	0.00725699	0.00185879	-0.34	0.00135367
CDYL	ENSG00000153046.18	chromodomain Y like	protein_coding	-0.25	4.41	0.00170948	0.000396709	-0.38	0.000231346
ZFAND6	ENSG00000086666.19	zinc finger AN1-type containing 6	protein_coding	-0.25	6.03	0.000204827	0.000139114	-0.41	6.72188e-05
YEATS4	ENSG00000127337.7	YEATS domain containing 4	protein_coding	-0.26	3.63	0.00174307	0.000572155	-0.37	0.000353814
MKLN1	ENSG00000128585.18	muskelin 1	protein_coding	-0.26	6	0.0132479	0.00132668	-0.35	0.000925643
RAB5B	ENSG00000111540.16	RAB5B, member RAS oncogene family	protein_coding	-0.26	7.78	8.80036e-10	2.30964e-10	-0.66	2.39586e-13
TSN	ENSG00000211460.12	translin	protein_coding	-0.26	6.46	1.36734e-05	2.54089e-06	-0.5	4.34627e-07
CHD7	ENSG00000171316.12	chromodomain helicase DNA binding protein 7	protein_coding	-0.26	4.55	0.0075739	0.00221834	-0.34	0.00165006
ASH1L	ENSG00000116539.14	ASH1 like histone lysine methyltransferase	protein_coding	-0.26	6.72	0.0163558	0.0213529	-0.26	0.0194942
TMX4	ENSG00000125827.9	thioredoxin related transmembrane protein 4	protein_coding	-0.26	7.29	0.00430781	0.000836121	-0.36	0.000547298
FEZ2	ENSG00000171055.15	fasciculation and elongation protein zeta 2	protein_coding	-0.26	5.85	0.00545619	0.0058036	-0.31	0.00478173
VEZF1	ENSG00000136451.9	vascular endothelial zinc finger 1	protein_coding	-0.27	6.4	0.00160357	0.000426855	-0.38	0.000251943
ATP6AP2	ENSG00000182220.15	ATPase H+ transporting accessory protein 2	protein_coding	-0.27	7.96	0.00836921	3.78232e-08	-0.58	1.12522e-09
TTPAL	ENSG00000124120.11	alpha tocopherol transfer protein like	protein_coding	-0.27	4.37	0.0194358	1.88473e-05	-0.46	5.80005e-06
DHX9	ENSG00000135829.17	DExH-box helicase 9	protein_coding	-0.27	7.57	0.000116656	7.12316e-05	-0.43	2.99944e-05
CHMP4C	ENSG00000164695.5	charged multivesicular body protein 4C	protein_coding	-0.27	3.68	0.0286823	0.00410455	-0.32	0.00326836
CMTR2	ENSG00000180917.18	cap methyltransferase 2	protein_coding	-0.27	4.96	0.00203098	0.000279146	-0.39	0.000153397
PDPK1	ENSG00000140992.19	3-phosphoinositide dependent protein kinase 1	protein_coding	-0.28	5.42	0.000232567	0.000128577	-0.41	6.11598e-05
NFYB	ENSG00000120837.8	nuclear transcription factor Y subunit beta	protein_coding	-0.28	5.09	0.00274483	0.000644107	-0.37	0.000405642
HUWE1	ENSG00000086758.16	HECT, UBA and WWE domain containing E3 ubiquitin protein ligase 1	protein_coding	-0.28	8.47	0.00427039	0.00547015	-0.31	0.00448104
SUPT16H	ENSG00000092201.10	SPT16 homolog, facilitates chromatin remodeling subunit	protein_coding	-0.28	6.74	0.00090854	0.00173855	-0.34	0.00125533
TM9SF3	ENSG00000077147.16	transmembrane 9 superfamily member 3	protein_coding	-0.28	8.09	0.00083418	1.79059e-06	-0.5	2.7234e-07
ELMO2	ENSG00000062598.18	engulfment and cell motility 2	protein_coding	-0.29	5.31	0.000201056	7.95744e-07	-0.52	9.04516e-08
HIPK3	ENSG00000110422.12	homeodomain interacting protein kinase 3	protein_coding	-0.29	7.47	0.000271856	1.11201e-05	-0.47	2.97e-06
ERC1	ENSG00000082805.20	ELKS/RAB6-interacting/CAST family member 1	protein_coding	-0.29	6.58	0.00402393	0.0096293	-0.29	0.00829495
CRB3	ENSG00000130545.16	crumbs cell polarity complex component 3	protein_coding	-0.29	4.57	0.0398927	0.00166435	-0.34	0.00119543
CLCN3	ENSG00000109572.14	chloride voltage-gated channel 3	protein_coding	-0.3	7.26	0.00230163	0.000448157	-0.38	0.000266668
KANK1	ENSG00000107104.20	KN motif and ankyrin repeat domains 1	protein_coding	-0.3	6.62	0.00695445	0.00148715	-0.35	0.00105294
TTC3	ENSG00000182670.13	tetratricopeptide repeat domain 3	protein_coding	-0.3	7.54	0.000239043	0.000118716	-0.41	5.55887e-05
GPATCH4	ENSG00000160818.17	G-patch domain containing 4	protein_coding	-0.3	4.53	0.000301936	7.32143e-05	-0.42	3.10107e-05
NUCKS1	ENSG00000069275.13	nuclear casein kinase and cyclin dependent kinase substrate 1	protein_coding	-0.3	8.58	2.33974e-05	1.42885e-06	-0.51	2.00995e-07
INPP5F	ENSG00000198825.15	inositol polyphosphate-5-phosphatase F	protein_coding	-0.31	4.7	0.000199726	1.93964e-05	-0.45	6.01339e-06
CEP41	ENSG00000106477.20	centrosomal protein 41	protein_coding	-0.31	3.64	0.00118495	9.84735e-05	-0.42	4.43995e-05
ENPP4	ENSG00000001561.7	ectonucleotide pyrophosphatase/phosphodiesterase 4	protein_coding	-0.32	5.92	0.0157435	0.0019007	-0.34	0.00138788
ZNF678	ENSG00000181450.18	zinc finger protein 678	protein_coding	-0.32	3.22	0.00373821	0.000333109	-0.39	0.000188711
SELENOI	ENSG00000138018.18	selenoprotein I	protein_coding	-0.32	5.54	0.000390922	9.08877e-05	-0.42	4.0295e-05
XIAP	ENSG00000101966.13	X-linked inhibitor of apoptosis	protein_coding	-0.33	6.44	1.31952e-05	3.00347e-07	-0.54	2.32666e-08
UBQLN1	ENSG00000135018.14	ubiquilin 1	protein_coding	-0.33	7.14	3.50054e-05	1.91972e-07	-0.55	1.23063e-08
TOMM5	ENSG00000175768.13	translocase of outer mitochondrial membrane 5	protein_coding	-0.33	-0.22	0.0060953	0.00021096	-0.4	0.000110259
PPP2R5E	ENSG00000154001.14	protein phosphatase 2 regulatory subunit B'epsilon	protein_coding	-0.33	5.67	6.77706e-05	8.49371e-07	-0.52	9.89389e-08
ARMC9	ENSG00000135931.18	armadillo repeat containing 9	protein_coding	-0.33	4.23	0.00024898	0.000128577	-0.41	6.11598e-05
TMEM267	ENSG00000151881.15	transmembrane protein 267	protein_coding	-0.33	3.79	0.00112759	1.58344e-05	-0.46	4.65482e-06
NCOA2	ENSG00000140396.13	nuclear receptor coactivator 2	protein_coding	-0.34	6.44	0.000873653	0.000239913	-0.4	0.000128331
ARF6	ENSG00000165527.7	ADP ribosylation factor 6	protein_coding	-0.34	7.05	0.00014802	4.32728e-05	-0.44	1.63053e-05
SPIN1	ENSG00000106723.17	spindlin 1	protein_coding	-0.34	7.14	6.99341e-06	2.38876e-06	-0.5	4.00187e-07
KBTBD6	ENSG00000165572.8	kelch repeat and BTB domain containing 6	protein_coding	-0.34	4.28	0.000338537	1.93964e-05	-0.45	6.01339e-06
TRAPPC8	ENSG00000153339.15	trafficking protein particle complex 8	protein_coding	-0.34	5.87	3.78608e-05	8.22696e-07	-0.52	9.46744e-08
MITF	ENSG00000187098.17	melanocyte inducing transcription factor	protein_coding	-0.35	6.03	0.0035376	0.000233817	-0.4	0.000124517
HCCS	ENSG00000004961.15	holocytochrome c synthase	protein_coding	-0.35	4.75	6.85431e-06	6.65991e-09	-0.61	7.53235e-11
TRIM33	ENSG00000197323.12	tripartite motif containing 33	protein_coding	-0.35	5.86	2.22911e-05	3.21529e-07	-0.54	2.56182e-08
LRIF1	ENSG00000121931.16	ligand dependent nuclear receptor interacting factor 1	protein_coding	-0.35	3.72	0.0187586	0.0202536	-0.26	0.0184272
PYROXD1	ENSG00000121350.16	pyridine nucleotide-disulphide oxidoreductase domain 1	protein_coding	-0.35	4.06	5.65494e-05	2.51989e-05	-0.45	8.3441e-06
ACVR2B	ENSG00000114739.14	activin A receptor type 2B	protein_coding	-0.36	4.12	0.00203334	0.000279146	-0.39	0.000153397
SECISBP2L	ENSG00000138593.9	SECIS binding protein 2 like	protein_coding	-0.36	6.88	0.000227279	1.13785e-06	-0.51	1.47646e-07
TCF7L1	ENSG00000152284.5	transcription factor 7 like 1	protein_coding	-0.36	4.36	0.00845747	3.17066e-05	-0.44	1.11032e-05
HDAC4	ENSG00000068024.17	histone deacetylase 4	protein_coding	-0.36	4.04	0.00113343	0.000103986	-0.42	4.74023e-05
MNAT1	ENSG00000020426.11	MNAT1 component of CDK activating kinase	protein_coding	-0.36	3.19	9.82758e-06	4.5167e-07	-0.53	4.12643e-08
PRKACB	ENSG00000142875.19	protein kinase cAMP-activated catalytic subunit beta	protein_coding	-0.36	6.38	6.70144e-05	8.88333e-08	-0.56	4.02414e-09
LIMA1	ENSG00000050405.13	LIM domain and actin binding 1	protein_coding	-0.36	6.94	0.00221758	0.0015906	-0.35	0.00113594
SUGP2	ENSG00000064607.17	SURP and G-patch domain containing 2	protein_coding	-0.36	5.98	0.000204327	5.36453e-06	-0.48	1.16183e-06
PPIL4	ENSG00000131013.4	peptidylprolyl isomerase like 4	protein_coding	-0.36	4.89	0.000165539	3.26291e-05	-0.44	1.15047e-05
UHMK1	ENSG00000152332.16	U2AF homology motif kinase 1	protein_coding	-0.37	7.56	9.48186e-05	7.44585e-08	-0.56	3.10159e-09
LARP4	ENSG00000161813.22	La ribonucleoprotein 4	protein_coding	-0.37	6.03	0.000304735	1.67828e-05	-0.46	5.01027e-06
RBM12	ENSG00000244462.8	RNA binding motif protein 12	protein_coding	-0.37	6.25	1.04054e-05	1.88473e-05	-0.46	5.80005e-06
PANK3	ENSG00000120137.7	pantothenate kinase 3	protein_coding	-0.37	6.35	4.45238e-05	4.67027e-07	-0.53	4.32402e-08
TMEM139	ENSG00000178826.11	transmembrane protein 139	protein_coding	-0.37	3.91	0.0195305	0.00275677	-0.33	0.00210248
COX11	ENSG00000166260.13	cytochrome c oxidase copper chaperone COX11	protein_coding	-0.37	5.78	3.73784e-06	2.11304e-08	-0.59	4.62596e-10
C2orf69	ENSG00000178074.6	chromosome 2 open reading frame 69	protein_coding	-0.37	4.33	0.000105263	5.71554e-09	-0.61	5.89573e-11
GAB1	ENSG00000109458.8	GRB2 associated binding protein 1	protein_coding	-0.38	5.47	0.000140458	6.55695e-05	-0.43	2.71211e-05
ITPR1	ENSG00000150995.20	inositol 1,4,5-trisphosphate receptor type 1	protein_coding	-0.38	6.69	0.0179668	4.2047e-05	-0.44	1.5741e-05
LRPPRC	ENSG00000138095.19	leucine rich pentatricopeptide repeat containing	protein_coding	-0.38	7.68	6.06083e-05	4.19573e-06	-0.49	8.42454e-07
TPCN1	ENSG00000186815.13	two pore segment channel 1	protein_coding	-0.38	6.71	0.00194446	0.0248913	-0.26	0.02294
MRPS30	ENSG00000112996.11	mitochondrial ribosomal protein S30	protein_coding	-0.38	5.45	3.82188e-07	2.04052e-08	-0.59	4.37847e-10
LEPR	ENSG00000116678.20	leptin receptor	protein_coding	-0.39	5.3	0.0340144	0.0244798	-0.26	0.0225389
CLPB	ENSG00000162129.14	caseinolytic mitochondrial matrix peptidase chaperone subunit B	protein_coding	-0.39	4.83	2.38889e-05	8.49452e-06	-0.47	2.10346e-06
MTSS1	ENSG00000170873.19	MTSS I-BAR domain containing 1	protein_coding	-0.39	5.69	0.00359706	2.37776e-05	-0.45	7.76124e-06
KIAA0040	ENSG00000235750.10	KIAA0040	protein_coding	-0.39	6.2	0.000469844	0.000659641	-0.37	0.000416956
BAP1	ENSG00000163930.10	BRCA1 associated protein 1	protein_coding	-0.4	6.15	1.12573e-05	3.51931e-08	-0.58	1.00881e-09
USP25	ENSG00000155313.15	ubiquitin specific peptidase 25	protein_coding	-0.4	5.9	6.00221e-07	4.21906e-07	-0.53	3.75235e-08
NGRN	ENSG00000182768.9	neugrin, neurite outgrowth associated	protein_coding	-0.4	4.05	0.00027081	0.00123948	-0.35	0.000856996
CPT2	ENSG00000157184.7	carnitine palmitoyltransferase 2	protein_coding	-0.4	4.4	0.00170324	0.000386913	-0.38	0.000224728
MAP7	ENSG00000135525.18	microtubule associated protein 7	protein_coding	-0.4	6.17	0.0404012	0.00340568	-0.32	0.00265902
KLHL42	ENSG00000087448.11	kelch like family member 42	protein_coding	-0.41	4.9	8.60679e-06	9.20115e-08	-0.56	4.23767e-09
CD164	ENSG00000135535.17	CD164 molecule	protein_coding	-0.41	8.92	8.31432e-06	1.10133e-06	-0.51	1.41237e-07
FZD6	ENSG00000164930.12	frizzled class receptor 6	protein_coding	-0.41	5.73	0.000514616	0.000195127	-0.4	0.000100559
DZIP1	ENSG00000134874.18	DAZ interacting zinc finger protein 1	protein_coding	-0.41	5.56	0.00163937	3.45013e-05	-0.44	1.23309e-05
DCAKD	ENSG00000172992.12	dephospho-CoA kinase domain containing	protein_coding	-0.41	5.13	7.73652e-06	1.05883e-07	-0.56	5.20634e-09
CNIH3	ENSG00000143786.8	cornichon family AMPA receptor auxiliary protein 3	protein_coding	-0.41	2.17	0.00120018	3.55013e-05	-0.44	1.27728e-05
NDUFB5	ENSG00000136521.13	NADH:ubiquinone oxidoreductase subunit B5	protein_coding	-0.42	6.58	8.81934e-06	4.19573e-06	-0.49	8.42454e-07
PPP2R1B	ENSG00000137713.16	protein phosphatase 2 scaffold subunit Abeta	protein_coding	-0.42	5.4	4.82069e-06	2.53082e-07	-0.54	1.82527e-08
SUCO	ENSG00000094975.14	SUN domain containing ossification factor	protein_coding	-0.42	5.79	1.65682e-05	1.10133e-06	-0.51	1.41237e-07
RTN4	ENSG00000115310.18	reticulon 4	protein_coding	-0.42	9.03	7.23092e-06	2.56829e-09	-0.62	1.58909e-11
RFESD	ENSG00000175449.14	Rieske Fe-S domain containing	protein_coding	-0.42	0.21	0.0032316	0.0266489	-0.25	0.0246532
C9orf78	ENSG00000136819.15	chromosome 9 open reading frame 78	protein_coding	-0.43	5.87	1.21058e-09	2.04835e-10	-0.66	1.9208e-13
PPM1B	ENSG00000138032.21	protein phosphatase, Mg2+/Mn2+ dependent 1B	protein_coding	-0.43	4.5	2.93626e-07	2.28367e-09	-0.63	1.30829e-11
HOXA5	ENSG00000106004.5	homeobox A5	protein_coding	-0.44	4.1	0.00018414	5.11858e-05	-0.43	2.00383e-05
MYO1D	ENSG00000176658.17	myosin ID	protein_coding	-0.44	6.83	0.000106869	3.45013e-05	-0.44	1.23309e-05
NQO1	ENSG00000181019.13	NAD(P)H quinone dehydrogenase 1	protein_coding	-0.44	5.46	0.00204624	0.000691909	-0.37	0.000440523
CA12	ENSG00000074410.14	carbonic anhydrase 12	protein_coding	-0.45	9.89	0.0337631	0.000142779	-0.41	6.93282e-05
UBE2W	ENSG00000104343.21	ubiquitin conjugating enzyme E2 W	protein_coding	-0.45	5.47	2.59066e-06	6.29828e-10	-0.65	1.44071e-12
ACOXL	ENSG00000153093.20	acyl-CoA oxidase like	protein_coding	-0.45	1.2	0.00128791	3.45013e-05	-0.44	1.23309e-05
C22orf39	ENSG00000242259.9	chromosome 22 open reading frame 39	protein_coding	-0.45	4.69	5.93593e-11	1.07818e-11	-0.71	5.95291e-16
GSKIP	ENSG00000100744.15	GSK3B interacting protein	protein_coding	-0.45	4.56	2.14698e-05	4.21906e-07	-0.53	3.75235e-08
DHX29	ENSG00000067248.10	DExH-box helicase 29	protein_coding	-0.45	5.61	1.73896e-08	4.38192e-09	-0.61	3.83214e-11
TGS1	ENSG00000137574.11	trimethylguanosine synthase 1	protein_coding	-0.45	4.71	2.7661e-06	3.26291e-05	-0.44	1.15047e-05
ATP6V1E1	ENSG00000131100.13	ATPase H+ transporting V1 subunit E1	protein_coding	-0.46	7.39	2.33781e-11	1.15354e-10	-0.67	6.63113e-14
ABI2	ENSG00000138443.17	abl interactor 2	protein_coding	-0.46	6.22	3.19777e-09	2.40606e-10	-0.66	2.58052e-13
NLK	ENSG00000087095.13	nemo like kinase	protein_coding	-0.46	5.35	1.21529e-07	1.81147e-09	-0.63	8.86912e-12
GSPT1	ENSG00000103342.13	G1 to S phase transition 1	protein_coding	-0.46	7.17	2.18317e-08	1.25868e-08	-0.6	2.06812e-10
CHMP2B	ENSG00000083937.10	charged multivesicular body protein 2B	protein_coding	-0.46	5.54	7.22482e-08	1.95564e-09	-0.63	1.00944e-11
FAM199X	ENSG00000123575.9	family with sequence similarity 199, X-linked	protein_coding	-0.46	6.45	8.88409e-07	2.44579e-08	-0.58	5.79312e-10
MRPL15	ENSG00000137547.9	mitochondrial ribosomal protein L15	protein_coding	-0.46	5.71	2.01699e-07	2.36324e-07	-0.54	1.65561e-08
CARNMT1	ENSG00000156017.13	carnosine N-methyltransferase 1	protein_coding	-0.46	4.75	7.24875e-07	1.6143e-09	-0.63	7.29519e-12
ACACA	ENSG00000278540.5	acetyl-CoA carboxylase alpha	protein_coding	-0.46	5.52	6.2169e-05	3.97175e-05	-0.44	1.46757e-05
BAG4	ENSG00000156735.11	BAG cochaperone 4	protein_coding	-0.47	4.93	7.00558e-09	4.95766e-12	-0.72	1.08428e-16
GLYR1	ENSG00000140632.17	glyoxylate reductase 1 homolog	protein_coding	-0.47	7.12	1.67835e-12	1.32852e-11	-0.71	9.23727e-16
LRRC6	ENSG00000129295.9	leucine rich repeat containing 6	protein_coding	-0.47	3.86	0.000226337	3.58593e-06	-0.49	6.85817e-07
DPY19L4	ENSG00000156162.16	dpy-19 like 4	protein_coding	-0.47	5.54	5.59446e-07	1.38212e-09	-0.63	5.60372e-12
TTC8	ENSG00000165533.19	tetratricopeptide repeat domain 8	protein_coding	-0.48	3.86	5.12548e-09	1.66943e-10	-0.67	1.31907e-13
SLC20A1	ENSG00000144136.11	solute carrier family 20 member 1	protein_coding	-0.48	5.49	0.0054465	0.0487487	-0.23	0.0465435
TSC22D2	ENSG00000196428.12	TSC22 domain family member 2	protein_coding	-0.48	5.33	3.49142e-06	2.59488e-05	-0.45	8.65382e-06
RPP14	ENSG00000163684.12	ribonuclease P/MRP subunit p14	protein_coding	-0.48	2.76	4.60361e-06	5.20185e-06	-0.48	1.11618e-06
SPINT1	ENSG00000166145.14	serine peptidase inhibitor, Kunitz type 1	protein_coding	-0.48	7.17	0.00697199	0.000798281	-0.36	0.000519012
BAIAP2L1	ENSG00000006453.14	BAR/IMD domain containing adaptor protein 2 like 1	protein_coding	-0.48	3.86	0.0242285	5.20185e-06	-0.48	1.11618e-06
NARS2	ENSG00000137513.10	asparaginyl-tRNA synthetase 2, mitochondrial	protein_coding	-0.49	4.25	7.49605e-08	9.04264e-11	-0.68	4.17467e-14
SPTSSA	ENSG00000165389.7	serine palmitoyltransferase small subunit A	protein_coding	-0.49	5.43	3.83045e-05	1.88044e-09	-0.63	9.45374e-12
PDK2	ENSG00000005882.12	pyruvate dehydrogenase kinase 2	protein_coding	-0.49	6.01	0.000504931	8.83887e-05	-0.42	3.89736e-05
RANBP2	ENSG00000153201.16	RAN binding protein 2	protein_coding	-0.49	7.18	2.16106e-06	4.98981e-07	-0.53	4.74388e-08
C22orf46	ENSG00000184208.12	chromosome 22 putative open reading frame 46	transcribed_unitary_pseudogene	-0.49	4.1	1.13049e-06	6.51853e-07	-0.52	6.8732e-08
RCN2	ENSG00000117906.14	reticulocalbin 2	protein_coding	-0.5	5.75	2.00454e-07	1.6143e-09	-0.63	7.29519e-12
B4GALT6	ENSG00000118276.11	beta-1,4-galactosyltransferase 6	protein_coding	-0.5	3.3	0.00898264	4.68706e-08	-0.57	1.55564e-09
FARP1	ENSG00000152767.17	FERM, ARH/RhoGEF and pleckstrin domain protein 1	protein_coding	-0.5	7.54	0.000214124	2.97178e-06	-0.49	5.35211e-07
ZNF669	ENSG00000188295.15	zinc finger protein 669	protein_coding	-0.5	2	1.54985e-05	5.20185e-06	-0.48	1.11618e-06
BBX	ENSG00000114439.19	BBX high mobility group box domain containing	protein_coding	-0.51	6.83	1.44798e-06	3.68684e-07	-0.54	3.10516e-08
SATB1	ENSG00000182568.17	SATB homeobox 1	protein_coding	-0.51	5.09	3.36664e-05	3.10534e-07	-0.54	2.43944e-08
CUL3	ENSG00000036257.13	cullin 3	protein_coding	-0.51	6.07	7.1885e-10	4.95663e-10	-0.65	9.45284e-13
KAT2B	ENSG00000114166.8	lysine acetyltransferase 2B	protein_coding	-0.51	5.63	2.45734e-07	3.15909e-08	-0.58	8.55945e-10
GDAP2	ENSG00000196505.11	ganglioside induced differentiation associated protein 2	protein_coding	-0.51	4.19	2.70348e-11	9.15293e-12	-0.71	4.18621e-16
HSPA8	ENSG00000109971.14	heat shock protein family A (Hsp70) member 8	protein_coding	-0.51	10.15	1.38225e-06	2.62139e-06	-0.5	4.53124e-07
FOXO1	ENSG00000150907.10	forkhead box O1	protein_coding	-0.52	5.29	4.76783e-05	5.50048e-09	-0.61	5.54336e-11
IP6K1	ENSG00000176095.12	inositol hexakisphosphate kinase 1	protein_coding	-0.52	6.07	1.25468e-10	2.81202e-11	-0.7	4.29924e-15
SCO1	ENSG00000133028.12	synthesis of cytochrome C oxidase 1	protein_coding	-0.52	5.3	1.76676e-09	8.27785e-10	-0.64	2.32698e-12
ABHD3	ENSG00000158201.10	abhydrolase domain containing 3, phospholipase	protein_coding	-0.53	3.89	3.1526e-05	2.77535e-09	-0.62	1.80661e-11
PRDM2	ENSG00000116731.22	PR/SET domain 2	protein_coding	-0.53	5.4	6.19007e-09	3.64665e-08	-0.58	1.06495e-09
GATA6	ENSG00000141448.11	GATA binding protein 6	protein_coding	-0.54	2.09	0.0073422	0.003193	-0.32	0.00247594
TPD52	ENSG00000076554.15	tumor protein D52	protein_coding	-0.54	6.02	4.98424e-06	2.44579e-08	-0.58	5.79312e-10
SETD2	ENSG00000181555.21	SET domain containing 2, histone lysine methyltransferase	protein_coding	-0.54	6.3	2.73598e-08	9.20115e-08	-0.56	4.23767e-09
USF3	ENSG00000176542.10	upstream transcription factor family member 3	protein_coding	-0.54	5.34	3.48991e-06	1.17581e-06	-0.51	1.54349e-07
TRPS1	ENSG00000104447.13	transcriptional repressor GATA binding 1	protein_coding	-0.55	4.79	2.53975e-06	1.03349e-06	-0.52	1.29437e-07
ZFP36L2	ENSG00000152518.8	ZFP36 ring finger protein like 2	protein_coding	-0.55	6.9	1.14316e-05	2.99332e-05	-0.45	1.03388e-05
SLC31A1	ENSG00000136868.11	solute carrier family 31 member 1	protein_coding	-0.55	6.01	1.81051e-05	1.57343e-06	-0.51	2.2894e-07
MSMO1	ENSG00000052802.13	methylsterol monooxygenase 1	protein_coding	-0.55	5.88	9.18746e-07	2.80512e-07	-0.54	2.11206e-08
MTUS1	ENSG00000129422.14	microtubule associated scaffold protein 1	protein_coding	-0.55	6.34	1.91786e-05	2.05877e-07	-0.55	1.35978e-08
HMGCS1	ENSG00000112972.15	3-hydroxy-3-methylglutaryl-CoA synthase 1	protein_coding	-0.56	5.44	2.22764e-08	1.82549e-08	-0.59	3.68799e-10
VTI1B	ENSG00000100568.11	vesicle transport through interaction with t-SNAREs 1B	protein_coding	-0.56	5.82	3.5232e-13	1.07818e-11	-0.71	5.95291e-16
LRRC8B	ENSG00000197147.15	leucine rich repeat containing 8 VRAC subunit B	protein_coding	-0.56	4.04	3.78599e-07	4.36588e-08	-0.57	1.39759e-09
PLEKHA7	ENSG00000166689.16	pleckstrin homology domain containing A7	protein_coding	-0.56	6.04	0.00013488	5.70973e-06	-0.48	1.2596e-06
ZNF697	ENSG00000143067.5	zinc finger protein 697	protein_coding	-0.56	4.64	6.44524e-05	6.45397e-06	-0.48	1.47648e-06
PATJ	ENSG00000132849.21	PATJ crumbs cell polarity complex component	protein_coding	-0.56	6.98	1.59925e-05	4.60057e-06	-0.49	9.50726e-07
PIGW	ENSG00000277161.2	phosphatidylinositol glycan anchor biosynthesis class W	protein_coding	-0.56	3.01	9.77701e-08	1.09537e-07	-0.56	5.47388e-09
CDC14B	ENSG00000081377.17	cell division cycle 14B	protein_coding	-0.58	5.41	5.09218e-07	7.95744e-07	-0.52	9.04516e-08
RANBP6	ENSG00000137040.10	RAN binding protein 6	protein_coding	-0.58	5.17	1.58619e-09	5.58151e-10	-0.65	1.16649e-12
TMBIM4	ENSG00000155957.18	transmembrane BAX inhibitor motif containing 4	protein_coding	-0.58	4.73	1.41224e-05	1.53741e-05	-0.46	4.48454e-06
SEPTIN6	ENSG00000125354.24	septin 6	protein_coding	-0.58	5.65	2.27508e-06	1.33906e-06	-0.51	1.84119e-07
CAB39	ENSG00000135932.11	calcium binding protein 39	protein_coding	-0.59	7.01	9.68886e-14	1.99938e-12	-0.74	1.34483e-17
DICER1	ENSG00000100697.15	dicer 1, ribonuclease III	protein_coding	-0.59	6.32	4.21271e-09	1.81147e-09	-0.63	8.86912e-12
HSPH1	ENSG00000120694.20	heat shock protein family H (Hsp110) member 1	protein_coding	-0.6	6.24	6.26982e-07	4.06717e-10	-0.65	6.64088e-13
HHLA3	ENSG00000197568.14	HERV-H LTR-associating 3	lncRNA	-0.6	3.06	5.42145e-07	1.13554e-07	-0.56	5.76671e-09
MCM8	ENSG00000125885.13	minichromosome maintenance 8 homologous recombination repair factor	protein_coding	-0.6	2.2	5.40618e-06	3.94567e-07	-0.53	3.41534e-08
ORMDL3	ENSG00000172057.10	ORMDL sphingolipid biosynthesis regulator 3	protein_coding	-0.6	6.1	1.6315e-09	5.29243e-09	-0.61	5.21046e-11
CDKN2AIP	ENSG00000168564.6	CDKN2A interacting protein	protein_coding	-0.61	5.05	1.39676e-09	2.66855e-09	-0.62	1.69356e-11
FSD1L	ENSG00000106701.13	fibronectin type III and SPRY domain containing 1 like	protein_coding	-0.61	2.88	2.58735e-06	4.06717e-10	-0.65	6.64088e-13
MAP3K21	ENSG00000143674.11	mitogen-activated protein kinase kinase kinase 21	protein_coding	-0.61	5.21	1.05974e-05	1.00022e-06	-0.52	1.23785e-07
SH3BGRL2	ENSG00000198478.8	SH3 domain binding glutamate rich protein like 2	protein_coding	-0.62	5.83	6.76877e-06	5.89562e-07	-0.53	5.98239e-08
PSD3	ENSG00000156011.17	pleckstrin and Sec7 domain containing 3	protein_coding	-0.63	3.88	0.00978488	6.51853e-07	-0.52	6.8732e-08
TC2N	ENSG00000165929.13	tandem C2 domains, nuclear	protein_coding	-0.63	4.82	0.000811776	0.000349907	-0.39	0.000199906
ZNF618	ENSG00000157657.14	zinc finger protein 618	protein_coding	-0.64	5.77	1.64679e-08	6.69975e-08	-0.57	2.65138e-09
TENT5C	ENSG00000183508.5	terminal nucleotidyltransferase 5C	protein_coding	-0.64	4.76	0.00597056	4.8289e-07	-0.53	4.53064e-08
PARD6B	ENSG00000124171.9	par-6 family cell polarity regulator beta	protein_coding	-0.66	5.8	7.71349e-07	6.69975e-08	-0.57	2.65138e-09
PLEKHH1	ENSG00000054690.14	pleckstrin homology, MyTH4 and FERM domain containing H1	protein_coding	-0.66	4.03	0.000122758	5.16043e-07	-0.53	4.97092e-08
ABHD4	ENSG00000100439.10	abhydrolase domain containing 4, N-acyl phospholipase B	protein_coding	-0.66	5.82	6.52957e-11	9.80449e-11	-0.68	4.87282e-14
GMFB	ENSG00000197045.13	glia maturation factor beta	protein_coding	-0.67	6.31	1.35249e-10	5.62882e-12	-0.72	1.43267e-16
RAB11FIP2	ENSG00000107560.12	RAB11 family interacting protein 2	protein_coding	-0.68	5.47	5.68853e-08	5.80739e-10	-0.65	1.25096e-12
SUSD5	ENSG00000173705.9	sushi domain containing 5	protein_coding	-0.68	2.13	0.0366326	0.00281574	-0.33	0.00215277
ENPP5	ENSG00000112796.10	ectonucleotide pyrophosphatase/phosphodiesterase family member 5	protein_coding	-0.68	5.41	0.000703263	5.70973e-06	-0.48	1.2596e-06
DLD	ENSG00000091140.14	dihydrolipoamide dehydrogenase	protein_coding	-0.71	7.17	1.85771e-11	1.50379e-11	-0.7	1.19773e-15
HOOK2	ENSG00000095066.12	hook microtubule tethering protein 2	protein_coding	-0.71	4.67	3.94289e-09	7.656e-10	-0.64	2.03041e-12
SPATA45	ENSG00000185523.6	spermatogenesis associated 45	protein_coding	-0.71	-3.52	0.00978568	0.000572947	-0.37	0.000354374
HGD	ENSG00000113924.12	homogentisate 1,2-dioxygenase	protein_coding	-0.72	6.41	0.000568449	0.0132231	-0.28	0.0116782
JPH1	ENSG00000104369.5	junctophilin 1	protein_coding	-0.72	1.15	0.00122827	2.10177e-06	-0.5	3.37477e-07
LPAR1	ENSG00000198121.13	lysophosphatidic acid receptor 1	protein_coding	-0.73	3.97	0.00629438	2.18135e-05	-0.45	6.96655e-06
SLMAP	ENSG00000163681.16	sarcolemma associated protein	protein_coding	-0.73	5.95	1.46939e-13	1.38514e-11	-0.71	1.00791e-15
DCUN1D1	ENSG00000043093.15	defective in cullin neddylation 1 domain containing 1	protein_coding	-0.73	5.51	1.11858e-14	3.10007e-13	-0.77	1.14675e-19
FAM160A1	ENSG00000164142.16	family with sequence similarity 160 member A1	protein_coding	-0.73	4.56	2.32207e-07	3.27609e-08	-0.58	9.04548e-10
ISOC1	ENSG00000066583.12	isochorismatase domain containing 1	protein_coding	-0.73	5.09	1.34563e-13	4.95766e-12	-0.72	1.08428e-16
PRKCZ	ENSG00000067606.17	protein kinase C zeta	protein_coding	-0.74	3.85	3.64593e-08	2.19653e-09	-0.63	1.2262e-11
DNAJC6	ENSG00000116675.16	DnaJ heat shock protein family (Hsp40) member C6	protein_coding	-0.74	4.36	0.000181249	4.98981e-07	-0.53	4.74388e-08
RHOF	ENSG00000139725.8	ras homolog family member F, filopodia associated	protein_coding	-0.75	-0.21	0.000306759	0.000233817	-0.4	0.000124517
MST1R	ENSG00000164078.13	macrophage stimulating 1 receptor	protein_coding	-0.75	0.91	0.000941845	8.61406e-05	-0.42	3.77653e-05
RHOD	ENSG00000173156.7	ras homolog family member D	protein_coding	-0.75	3.68	1.05715e-05	4.89257e-06	-0.48	1.03016e-06
AGL	ENSG00000162688.17	amylo-alpha-1, 6-glucosidase, 4-alpha-glucanotransferase	protein_coding	-0.76	5.88	5.19711e-11	8.29457e-11	-0.68	3.55472e-14
CXADR	ENSG00000154639.19	CXADR Ig-like cell adhesion molecule	protein_coding	-0.76	5.36	0.00033573	1.52346e-06	-0.51	2.19197e-07
ANKRD46	ENSG00000186106.11	ankyrin repeat domain 46	protein_coding	-0.76	5.28	5.25221e-12	7.45034e-12	-0.72	2.6797e-16
SLC1A2	ENSG00000110436.13	solute carrier family 1 member 2	protein_coding	-0.77	-0.12	0.000761765	0.00105552	-0.36	0.000713996
SINHCAF	ENSG00000139146.14	SIN3-HDAC complex associated factor	protein_coding	-0.77	5.83	1.19101e-10	2.60974e-10	-0.66	2.99069e-13
LRATD2	ENSG00000168672.4	LRAT domain containing 2	protein_coding	-0.77	6.74	4.39899e-10	1.50379e-11	-0.7	1.19773e-15
LPIN2	ENSG00000101577.10	lipin 2	protein_coding	-0.79	6.6	3.03542e-11	1.06378e-10	-0.67	5.68788e-14
SLC25A38	ENSG00000144659.13	solute carrier family 25 member 38	protein_coding	-0.79	4.9	1.21418e-17	1.26727e-12	-0.74	4.5092e-18
SOWAHC	ENSG00000198142.5	sosondowah ankyrin repeat domain family member C	protein_coding	-0.81	5.54	7.73901e-07	2.90341e-07	-0.54	2.21752e-08
TOP2B	ENSG00000077097.15	DNA topoisomerase II beta	protein_coding	-0.82	7.16	1.01503e-15	9.54341e-12	-0.71	4.57666e-16
PLGRKT	ENSG00000107020.10	plasminogen receptor with a C-terminal lysine	protein_coding	-0.82	4.25	5.11303e-12	2.10578e-11	-0.7	2.38721e-15
ATP5MC3	ENSG00000154518.10	ATP synthase membrane subunit c locus 3	protein_coding	-0.83	7.87	2.21166e-13	5.7106e-11	-0.68	1.73632e-14
ABHD5	ENSG00000011198.10	abhydrolase domain containing 5, lysophosphatidic acid acyltransferase	protein_coding	-0.83	4.62	9.66713e-17	6.59641e-13	-0.75	8.74201e-19
WWC1	ENSG00000113645.15	WW and C2 domain containing 1	protein_coding	-0.83	7.49	1.22328e-08	3.19396e-10	-0.66	4.30851e-13
KLHL15	ENSG00000174010.9	kelch like family member 15	protein_coding	-0.83	4.28	6.50037e-13	3.42079e-12	-0.73	4.68622e-17
C3orf49	ENSG00000163632.14	chromosome 3 open reading frame 49	protein_coding	-0.84	-2.06	1.24604e-07	3.78232e-08	-0.58	1.12522e-09
PDE7B	ENSG00000171408.14	phosphodiesterase 7B	protein_coding	-0.85	4.33	7.36687e-08	8.0266e-09	-0.6	1.0162e-10
AVPR1A	ENSG00000166148.4	arginine vasopressin receptor 1A	protein_coding	-0.87	4.38	0.0108094	8.61406e-05	-0.42	3.77653e-05
MT-ATP6	ENSG00000198899.2	mitochondrially encoded ATP synthase membrane subunit 6	protein_coding	-0.87	12.37	3.65923e-07	6.09656e-07	-0.53	6.2663e-08
CPEB4	ENSG00000113742.14	cytoplasmic polyadenylation element binding protein 4	protein_coding	-0.87	7.07	2.63598e-10	8.27785e-10	-0.64	2.32698e-12
TSPAN1	ENSG00000117472.10	tetraspanin 1	protein_coding	-0.87	8.2	0.003117	4.46295e-06	-0.49	9.13549e-07
ENPP1	ENSG00000197594.13	ectonucleotide pyrophosphatase/phosphodiesterase 1	protein_coding	-0.9	4.26	7.00509e-05	7.71454e-08	-0.56	3.26838e-09
LTBP1	ENSG00000049323.16	latent transforming growth factor beta binding protein 1	protein_coding	-0.91	6.77	0.000143813	0.0150401	-0.27	0.0134064
GCH1	ENSG00000131979.20	GTP cyclohydrolase 1	protein_coding	-0.92	4.25	1.42003e-06	1.10133e-06	-0.51	1.41237e-07
MFHAS1	ENSG00000147324.11	malignant fibrous histiocytoma amplified sequence 1	protein_coding	-0.92	5.55	2.90054e-09	2.28367e-09	-0.63	1.30829e-11
MATN2	ENSG00000132561.14	matrilin 2	protein_coding	-0.93	6.26	3.16691e-07	1.21195e-08	-0.6	1.94958e-10
PON3	ENSG00000105852.11	paraoxonase 3	protein_coding	-0.94	1.19	0.0110712	1.21797e-07	-0.56	6.38627e-09
STRBP	ENSG00000165209.19	spermatid perinuclear RNA binding protein	protein_coding	-0.94	4.7	2.21429e-14	4.74798e-12	-0.72	9.86772e-17
RAB17	ENSG00000124839.13	RAB17, member RAS oncogene family	protein_coding	-0.94	6.13	7.07069e-08	5.09382e-09	-0.61	4.89854e-11
TOB1	ENSG00000141232.5	transducer of ERBB2, 1	protein_coding	-0.95	6.73	1.414e-10	7.08314e-10	-0.64	1.77128e-12
ADAL	ENSG00000168803.16	adenosine deaminase like	protein_coding	-0.95	3.77	1.30143e-13	1.70315e-11	-0.7	1.55102e-15
MNS1	ENSG00000138587.6	meiosis specific nuclear structural 1	protein_coding	-0.96	3.39	2.88776e-06	1.14533e-05	-0.47	3.08448e-06
CAPN5	ENSG00000149260.18	calpain 5	protein_coding	-0.96	5.64	1.25147e-09	4.55057e-12	-0.72	8.98489e-17
SLIT2	ENSG00000145147.20	slit guidance ligand 2	protein_coding	-0.96	5.09	0.0231041	1.36679e-05	-0.46	3.86338e-06
PKIA	ENSG00000171033.13	cAMP-dependent protein kinase inhibitor alpha	protein_coding	-0.97	3.52	0.000243526	2.93981e-08	-0.58	7.66842e-10
GOT1	ENSG00000120053.12	glutamic-oxaloacetic transaminase 1	protein_coding	-0.98	7.29	4.24342e-10	2.21857e-10	-0.66	2.22557e-13
PRKCA	ENSG00000154229.12	protein kinase C alpha	protein_coding	-0.99	6.18	1.00056e-12	2.58784e-11	-0.7	3.63625e-15
NFAT5	ENSG00000102908.22	nuclear factor of activated T cells 5	protein_coding	-0.99	6.54	5.05229e-10	3.23218e-09	-0.62	2.32567e-11
FERMT1	ENSG00000101311.16	fermitin family member 1	protein_coding	-1	2.91	0.00442089	0.000426855	-0.38	0.000251943
WNT16	ENSG00000002745.13	Wnt family member 16	protein_coding	-1.02	-2.88	0.00360205	0.00366722	-0.32	0.00288542
EMCN	ENSG00000164035.10	endomucin	protein_coding	-1.02	6.88	2.58817e-06	1.98794e-07	-0.55	1.29358e-08
SYNE2	ENSG00000054654.19	spectrin repeat containing nuclear envelope protein 2	protein_coding	-1.04	8.44	3.25428e-10	8.0266e-09	-0.6	1.0162e-10
NAP1L5	ENSG00000177432.8	nucleosome assembly protein 1 like 5	protein_coding	-1.05	3.52	6.64462e-16	9.89568e-13	-0.75	2.45276e-18
PTPRD	ENSG00000153707.17	protein tyrosine phosphatase receptor type D	protein_coding	-1.06	5.44	0.00532423	0.003193	-0.32	0.00247594
PTPN4	ENSG00000088179.9	protein tyrosine phosphatase non-receptor type 4	protein_coding	-1.07	5.41	8.43985e-18	5.09454e-14	-0.79	4.96242e-22
LOXL4	ENSG00000138131.4	lysyl oxidase like 4	protein_coding	-1.07	4.44	7.78559e-06	0.000293581	-0.39	0.000162765
DSP	ENSG00000096696.14	desmoplakin	protein_coding	-1.08	7.74	2.44312e-05	1.74139e-09	-0.63	8.30225e-12
F3	ENSG00000117525.14	coagulation factor III, tissue factor	protein_coding	-1.08	4.05	0.00156935	8.27785e-10	-0.64	2.32698e-12
SH2D3A	ENSG00000125731.13	SH2 domain containing 3A	protein_coding	-1.08	3.47	5.01266e-10	9.41594e-11	-0.68	4.51066e-14
DMKN	ENSG00000161249.21	dermokine	protein_coding	-1.08	4.84	0.00209724	3.35941e-09	-0.62	2.47782e-11
SVIP	ENSG00000198168.9	small VCP interacting protein	protein_coding	-1.1	5.47	6.62577e-19	1.70177e-13	-0.78	2.1063e-20
FLG	ENSG00000143631.11	filaggrin	protein_coding	-1.11	1.34	0.000276707	7.08314e-10	-0.64	1.77128e-12
LMO7	ENSG00000136153.20	LIM domain 7	protein_coding	-1.11	6.77	3.12405e-12	5.86207e-12	-0.72	1.56867e-16
PLLP	ENSG00000102934.10	plasmolipin	protein_coding	-1.11	5.5	8.24829e-13	9.15293e-12	-0.71	4.18621e-16
RGL3	ENSG00000205517.13	ral guanine nucleotide dissociation stimulator like 3	protein_coding	-1.12	4.45	2.77453e-10	1.44552e-11	-0.71	1.10057e-15
EXPH5	ENSG00000110723.12	exophilin 5	protein_coding	-1.12	4.21	8.25186e-08	1.22912e-09	-0.64	4.58804e-12
FAM171A2	ENSG00000161682.15	family with sequence similarity 171 member A2	protein_coding	-1.12	1.39	9.97838e-06	1.57343e-06	-0.51	2.2894e-07
CYP1B1	ENSG00000138061.12	cytochrome P450 family 1 subfamily B member 1	protein_coding	-1.13	6.63	0.000615444	4.38192e-09	-0.61	3.83214e-11
GPRC5B	ENSG00000167191.12	G protein-coupled receptor class C group 5 member B	protein_coding	-1.14	6.85	1.92484e-12	9.94387e-12	-0.71	4.99909e-16
ZNF165	ENSG00000197279.4	zinc finger protein 165	protein_coding	-1.15	1.76	1.36389e-12	2.567e-12	-0.73	2.41054e-17
ATP6V1A	ENSG00000114573.10	ATPase H+ transporting V1 subunit A	protein_coding	-1.16	8.07	9.69122e-12	3.14529e-14	-0.8	9.28945e-23
ICA1	ENSG00000003147.19	islet cell autoantigen 1	protein_coding	-1.16	3.94	1.24846e-15	2.5245e-13	-0.77	6.54156e-20
OR5P2	ENSG00000183303.2	olfactory receptor family 5 subfamily P member 2	protein_coding	-1.16	-4.9	0.00317632	0.0178186	-0.27	0.0158758
CPEB3	ENSG00000107864.15	cytoplasmic polyadenylation element binding protein 3	protein_coding	-1.18	4.22	7.91182e-14	6.87356e-12	-0.72	2.24187e-16
C14orf132	ENSG00000227051.7	chromosome 14 open reading frame 132	protein_coding	-1.18	4.44	0.000147365	1.95564e-09	-0.63	1.00944e-11
CLDN7	ENSG00000181885.18	claudin 7	protein_coding	-1.2	5.53	1.37422e-07	1.33044e-09	-0.63	5.24824e-12
PBX1	ENSG00000185630.19	PBX homeobox 1	protein_coding	-1.2	6.76	3.75426e-09	2.19261e-11	-0.7	2.59634e-15
MFSD3	ENSG00000167700.9	major facilitator superfamily domain containing 3	protein_coding	-1.21	4.04	1.49411e-10	9.80449e-11	-0.68	4.87282e-14
RASSF8	ENSG00000123094.15	Ras association domain family member 8	protein_coding	-1.24	5.95	1.11424e-19	2.94001e-14	-0.8	7.17362e-23
EHD3	ENSG00000013016.16	EH domain containing 3	protein_coding	-1.24	5.87	3.37686e-08	0.000286247	-0.39	0.000158005
RALBP1	ENSG00000017797.13	ralA binding protein 1	protein_coding	-1.24	7.2	2.35835e-17	2.85339e-13	-0.77	9.16386e-20
GLRX5	ENSG00000182512.5	glutaredoxin 5	protein_coding	-1.24	5.48	1.67394e-28	7.61042e-15	-0.84	9.54133e-26
SLC22A25	ENSG00000196600.12	solute carrier family 22 member 25	protein_coding	-1.24	-4.77	0.00274102	0.000498286	-0.38	0.000299767
CARMIL1	ENSG00000079691.18	capping protein regulator and myosin 1 linker 1	protein_coding	-1.24	5.52	1.17309e-22	1.90771e-14	-0.81	1.27799e-23
SLC16A10	ENSG00000112394.17	solute carrier family 16 member 10	protein_coding	-1.26	3.85	4.8124e-06	8.27785e-10	-0.64	2.32698e-12
MYO5C	ENSG00000128833.13	myosin VC	protein_coding	-1.26	4.81	1.90653e-13	1.07818e-11	-0.71	5.95291e-16
LAMC2	ENSG00000058085.15	laminin subunit gamma 2	protein_coding	-1.28	5.51	0.000858903	1.90944e-06	-0.5	2.96829e-07
ATP1B1	ENSG00000143153.13	ATPase Na+/K+ transporting subunit beta 1	protein_coding	-1.28	10.64	7.94769e-14	9.15293e-12	-0.71	4.18621e-16
GRB7	ENSG00000141738.14	growth factor receptor bound protein 7	protein_coding	-1.29	4.91	3.89949e-13	8.09121e-12	-0.71	3.20591e-16
CDS1	ENSG00000163624.6	CDP-diacylglycerol synthase 1	protein_coding	-1.3	5.55	9.02594e-13	1.07818e-11	-0.71	5.95291e-16
CD82	ENSG00000085117.12	CD82 molecule	protein_coding	-1.3	5.97	1.80753e-06	3.81683e-06	-0.49	7.44386e-07
ACSL4	ENSG00000068366.20	acyl-CoA synthetase long chain family member 4	protein_coding	-1.31	7.41	1.06517e-16	3.10007e-13	-0.77	1.14675e-19
TNFSF15	ENSG00000181634.8	TNF superfamily member 15	protein_coding	-1.32	3.3	6.89069e-10	7.32753e-11	-0.68	2.8051e-14
ST14	ENSG00000149418.11	ST14 transmembrane serine protease matriptase	protein_coding	-1.34	6.86	8.42869e-08	1.60178e-10	-0.67	1.22243e-13
TBC1D30	ENSG00000111490.15	TBC1 domain family member 30	protein_coding	-1.35	1.27	1.96373e-16	3.34133e-13	-0.76	1.42167e-19
PIP4K2C	ENSG00000166908.18	phosphatidylinositol-5-phosphate 4-kinase type 2 gamma	protein_coding	-1.35	6.25	5.14976e-29	7.37364e-15	-0.84	2.01382e-26
AMFR	ENSG00000159461.15	autocrine motility factor receptor	protein_coding	-1.35	7.86	9.63836e-21	2.94001e-14	-0.8	7.17362e-23
WLS	ENSG00000116729.14	Wnt ligand secretion mediator	protein_coding	-1.39	7.06	5.43409e-18	2.19611e-14	-0.81	2.21114e-23
CACNB4	ENSG00000182389.20	calcium voltage-gated channel auxiliary subunit beta 4	protein_coding	-1.41	1.95	5.38208e-05	2.04835e-10	-0.66	1.9208e-13
LPL	ENSG00000175445.17	lipoprotein lipase	protein_coding	-1.42	5.71	3.62189e-07	7.94628e-05	-0.42	3.42486e-05
HAS2	ENSG00000170961.7	hyaluronan synthase 2	protein_coding	-1.43	1.3	3.95183e-05	4.97637e-05	-0.43	1.93595e-05
IRF2BPL	ENSG00000119669.5	interferon regulatory factor 2 binding protein like	protein_coding	-1.44	5.99	7.59536e-19	1.90124e-13	-0.77	2.9485e-20
CYP24A1	ENSG00000019186.10	cytochrome P450 family 24 subfamily A member 1	protein_coding	-1.47	4.36	0.0110785	1.26166e-07	-0.56	6.72142e-09
GRB14	ENSG00000115290.10	growth factor receptor bound protein 14	protein_coding	-1.49	4.44	2.80879e-07	1.45096e-13	-0.78	1.32245e-20
LLGL2	ENSG00000073350.14	LLGL scribble cell polarity complex component 2	protein_coding	-1.49	6.22	2.41882e-19	3.91449e-14	-0.8	2.02587e-22
NAV2	ENSG00000166833.22	neuron navigator 2	protein_coding	-1.5	5.69	1.21873e-20	2.74764e-13	-0.77	8.21787e-20
VEPH1	ENSG00000197415.12	ventricular zone expressed PH domain containing 1	protein_coding	-1.54	5.44	1.34396e-16	6.12994e-14	-0.79	9.25075e-22
PTPN13	ENSG00000163629.13	protein tyrosine phosphatase non-receptor type 13	protein_coding	-1.55	6.74	5.94646e-22	1.63131e-14	-0.82	6.48431e-24
SLC44A4	ENSG00000204385.13	solute carrier family 44 member 4	protein_coding	-1.59	6.17	1.50878e-06	4.4567e-11	-0.69	1.06951e-14
SORCS2	ENSG00000184985.16	sortilin related VPS10 domain containing receptor 2	protein_coding	-1.59	4.96	5.93838e-06	8.57967e-08	-0.56	3.82251e-09
PITPNM3	ENSG00000091622.16	PITPNM family member 3	protein_coding	-1.59	2.54	1.49923e-11	3.71772e-12	-0.73	5.66054e-17
C6orf132	ENSG00000188112.9	chromosome 6 open reading frame 132	protein_coding	-1.6	3.85	3.41969e-08	4.8289e-07	-0.53	4.53064e-08
LRP1B	ENSG00000168702.18	LDL receptor related protein 1B	protein_coding	-1.61	1.24	0.000529191	1.17326e-11	-0.71	7.09432e-16
ALDH1A3	ENSG00000184254.17	aldehyde dehydrogenase 1 family member A3	protein_coding	-1.61	3.98	1.61526e-05	0.030438	-0.25	0.0283787
RLN1	ENSG00000107018.8	relaxin 1	protein_coding	-1.62	-2.18	7.2879e-11	3.04573e-08	-0.58	8.09739e-10
PTPRZ1	ENSG00000106278.12	protein tyrosine phosphatase receptor type Z1	protein_coding	-1.68	-0.9	2.43747e-05	9.00081e-11	-0.68	4.1311e-14
TPD52L1	ENSG00000111907.21	TPD52 like 1	protein_coding	-1.68	4.92	2.31953e-11	1.11549e-12	-0.74	3.317e-18
BTC	ENSG00000174808.12	betacellulin	protein_coding	-1.69	2.92	2.55089e-15	6.35911e-14	-0.79	1.04606e-21
APCDD1L	ENSG00000198768.11	APC down-regulated 1 like	protein_coding	-1.7	2.85	6.1752e-05	1.32852e-11	-0.71	9.23727e-16
VDR	ENSG00000111424.12	vitamin D receptor	protein_coding	-1.71	5.28	6.60155e-12	7.73062e-09	-0.6	9.57092e-11
GDF15	ENSG00000130513.6	growth differentiation factor 15	protein_coding	-1.72	6.9	1.00063e-11	5.09382e-09	-0.61	4.89854e-11
NPNT	ENSG00000168743.13	nephronectin	protein_coding	-1.76	7.08	5.28209e-10	5.94928e-11	-0.68	1.8805e-14
RAB3B	ENSG00000169213.7	RAB3B, member RAS oncogene family	protein_coding	-1.77	2.37	6.29592e-05	2.60974e-10	-0.66	2.99069e-13
GPRC5A	ENSG00000013588.9	G protein-coupled receptor class C group 5 member A	protein_coding	-1.77	5.35	5.82153e-06	3.472e-11	-0.69	6.53366e-15
WNK3	ENSG00000196632.10	WNK lysine deficient protein kinase 3	protein_coding	-1.77	2.52	3.84858e-12	6.12994e-14	-0.79	9.25075e-22
CMTM4	ENSG00000183723.13	CKLF like MARVEL transmembrane domain containing 4	protein_coding	-1.81	7.19	2.02334e-18	4.77393e-14	-0.8	3.8906e-22
PPM1H	ENSG00000111110.12	protein phosphatase, Mg2+/Mn2+ dependent 1H	protein_coding	-1.82	5.46	1.90074e-14	1.90124e-13	-0.77	2.9485e-20
ANXA3	ENSG00000138772.13	annexin A3	protein_coding	-1.83	4.79	2.06667e-08	5.86207e-12	-0.72	1.56867e-16
CTH	ENSG00000116761.12	cystathionine gamma-lyase	protein_coding	-1.83	3.18	7.71608e-21	5.09454e-14	-0.79	4.96242e-22
SELENBP1	ENSG00000143416.21	selenium binding protein 1	protein_coding	-1.83	6.26	2.14499e-21	2.13387e-13	-0.77	4.13263e-20
MYCN	ENSG00000134323.12	MYCN proto-oncogene, bHLH transcription factor	protein_coding	-1.85	1.07	3.19329e-10	1.40173e-07	-0.55	7.82872e-09
IRF6	ENSG00000117595.12	interferon regulatory factor 6	protein_coding	-1.85	5.69	1.27556e-11	1.37724e-14	-0.82	2.87034e-24
MISP	ENSG00000099812.9	mitotic spindle positioning	protein_coding	-1.85	3.51	3.35141e-06	8.66623e-11	-0.68	3.8551e-14
SAMD12	ENSG00000177570.15	sterile alpha motif domain containing 12	protein_coding	-1.85	4.6	1.18893e-13	6.35911e-14	-0.79	1.04606e-21
ADAMTS15	ENSG00000166106.3	ADAM metallopeptidase with thrombospondin type 1 motif 15	protein_coding	-1.86	4.49	2.64199e-09	1.33044e-09	-0.63	5.24824e-12
GATM	ENSG00000171766.17	glycine amidinotransferase	protein_coding	-1.88	9.86	8.55464e-07	0.0058036	-0.31	0.00478173
ILDR1	ENSG00000145103.15	immunoglobulin like domain containing receptor 1	protein_coding	-1.92	4.37	5.77872e-18	1.63131e-14	-0.82	6.48431e-24
NTRK2	ENSG00000148053.17	neurotrophic receptor tyrosine kinase 2	protein_coding	-1.93	6.61	4.74375e-08	2.04835e-10	-0.66	1.9208e-13
MT1F	ENSG00000198417.7	metallothionein 1F	protein_coding	-1.94	5.97	9.95364e-08	6.97112e-07	-0.52	7.53862e-08
HSPB9	ENSG00000260325.2	heat shock protein family B (small) member 9	protein_coding	-1.94	-1.93	3.01517e-11	3.01056e-10	-0.66	3.86524e-13
NDNF	ENSG00000173376.14	neuron derived neurotrophic factor	protein_coding	-1.97	5.63	0.000990786	6.29828e-10	-0.65	1.44071e-12
VAT1L	ENSG00000171724.3	vesicle amine transport 1 like	protein_coding	-2.01	4.02	0.000148541	2.16722e-12	-0.73	1.63093e-17
CORO2B	ENSG00000103647.13	coronin 2B	protein_coding	-2.02	3.7	2.0967e-14	5.50528e-14	-0.79	6.39754e-22
SHC3	ENSG00000148082.10	SHC adaptor protein 3	protein_coding	-2.05	1.92	1.05135e-16	1.22447e-11	-0.71	7.7686e-16
MCOLN3	ENSG00000055732.13	mucolipin 3	protein_coding	-2.05	2.42	3.4936e-07	5.23522e-13	-0.76	4.69584e-19
STYK1	ENSG00000060140.9	serine/threonine/tyrosine kinase 1	protein_coding	-2.13	0.29	6.52957e-11	6.51853e-07	-0.52	6.8732e-08
CHN2	ENSG00000106069.23	chimerin 2	protein_coding	-2.16	-1.17	2.87803e-19	3.52328e-14	-0.8	1.38053e-22
GPAT3	ENSG00000138678.11	glycerol-3-phosphate acyltransferase 3	protein_coding	-2.16	6.12	1.57884e-09	2.63269e-13	-0.77	7.33044e-20
CHRDL1	ENSG00000101938.15	chordin like 1	protein_coding	-2.17	4.09	3.74889e-06	2.28642e-11	-0.7	2.82658e-15
NAP1L2	ENSG00000186462.9	nucleosome assembly protein 1 like 2	protein_coding	-2.2	3.63	2.55104e-12	2.41991e-14	-0.81	3.28836e-23
CHAC1	ENSG00000128965.13	ChaC glutathione specific gamma-glutamylcyclotransferase 1	protein_coding	-2.2	2.43	3.72799e-13	3.77712e-11	-0.69	7.71355e-15
DACH1	ENSG00000276644.5	dachshund family transcription factor 1	protein_coding	-2.22	4.45	2.5201e-14	6.87965e-13	-0.75	9.71966e-19
FBP1	ENSG00000165140.11	fructose-bisphosphatase 1	protein_coding	-2.23	6.09	6.64551e-12	1.73866e-10	-0.67	1.42207e-13
MARVELD2	ENSG00000152939.17	MARVEL domain containing 2	protein_coding	-2.27	5.12	2.09171e-20	1.21056e-14	-0.82	1.44868e-24
PFKFB2	ENSG00000123836.15	6-phosphofructo-2-kinase/fructose-2,6-biphosphatase 2	protein_coding	-2.28	5.66	2.93635e-23	3.04281e-14	-0.8	8.17043e-23
ALS2CL	ENSG00000178038.17	ALS2 C-terminal like	protein_coding	-2.34	4.71	4.76524e-14	2.63269e-13	-0.77	7.33044e-20
ERMP1	ENSG00000099219.14	endoplasmic reticulum metallopeptidase 1	protein_coding	-2.36	7.49	4.514e-24	8.03284e-15	-0.83	1.65086e-25
SHOC1	ENSG00000165181.16	shortage in chiasmata 1	protein_coding	-2.42	1.09	3.03188e-08	3.91449e-14	-0.8	2.02587e-22
SHISA2	ENSG00000180730.5	shisa family member 2	protein_coding	-2.46	2.99	3.04546e-10	9.89568e-13	-0.75	2.45276e-18
MAL2	ENSG00000147676.14	mal, T cell differentiation protein 2	protein_coding	-2.47	7.16	9.11454e-13	1.23145e-13	-0.78	8.21385e-21
LGR5	ENSG00000139292.13	leucine rich repeat containing G protein-coupled receptor 5	protein_coding	-2.48	0.98	5.82226e-05	3.68534e-09	-0.62	2.88529e-11
SATL1	ENSG00000184788.14	spermidine/spermine N1-acetyl transferase like 1	protein_coding	-2.49	-1.82	1.21904e-14	1.0664e-11	-0.71	5.79108e-16
RASD1	ENSG00000108551.5	ras related dexamethasone induced 1	protein_coding	-2.61	7.09	7.25132e-15	1.70177e-13	-0.78	2.1063e-20
MAB21L2	ENSG00000181541.6	mab-21 like 2	protein_coding	-2.64	-4.37	1.30062e-09	3.01816e-07	-0.54	2.33364e-08
TMC5	ENSG00000103534.17	transmembrane channel like 5	protein_coding	-2.68	0.92	4.29791e-07	4.60057e-06	-0.49	9.50726e-07
CBLC	ENSG00000142273.13	Cbl proto-oncogene C	protein_coding	-2.7	1.99	5.17152e-16	1.37724e-14	-0.82	2.87034e-24
C1orf116	ENSG00000182795.13	chromosome 1 open reading frame 116	protein_coding	-2.75	4.39	1.05578e-11	6.56107e-14	-0.79	1.17593e-21
NECTIN4	ENSG00000143217.9	nectin cell adhesion molecule 4	protein_coding	-2.78	2.19	1.73397e-12	1.70177e-13	-0.78	2.1063e-20
ALDH6A1	ENSG00000119711.13	aldehyde dehydrogenase 6 family member A1	protein_coding	-2.79	7.99	9.63797e-17	7.15805e-12	-0.72	2.45214e-16
AP1M2	ENSG00000129354.12	adaptor related protein complex 1 subunit mu 2	protein_coding	-2.81	5.56	1.84817e-23	5.97276e-15	-0.86	7.62845e-28
MYZAP	ENSG00000263155.6	myocardial zonula adherens protein	protein_coding	-2.85	1.06	3.82399e-16	8.3305e-14	-0.79	2.47471e-21
KRT7	ENSG00000135480.16	keratin 7	protein_coding	-2.88	6	3.5723e-10	4.45324e-13	-0.76	3.05966e-19
RBM11	ENSG00000185272.14	RNA binding motif protein 11	protein_coding	-2.89	0.56	6.8424e-15	1.18041e-14	-0.82	1.26188e-24
ADH1B	ENSG00000196616.14	alcohol dehydrogenase 1B (class I), beta polypeptide	protein_coding	-2.91	6.21	6.36402e-10	7.46732e-13	-0.75	1.19788e-18
FUT2	ENSG00000176920.13	fucosyltransferase 2	protein_coding	-2.92	1	6.46263e-15	2.13303e-10	-0.66	2.06896e-13
GALNT3	ENSG00000115339.14	polypeptide N-acetylgalactosaminyltransferase 3	protein_coding	-2.98	4.49	9.19532e-18	3.91449e-14	-0.8	2.02587e-22
EPCAM	ENSG00000119888.11	epithelial cell adhesion molecule	protein_coding	-2.98	7.71	1.26103e-19	1.031e-14	-0.83	6.98613e-25
PAPPA	ENSG00000182752.10	pappalysin 1	protein_coding	-2.99	4.86	1.57588e-16	2.69039e-14	-0.81	4.91045e-23
FAM169A	ENSG00000198780.12	family with sequence similarity 169 member A	protein_coding	-3.04	3.32	7.98508e-14	3.80216e-14	-0.8	1.79432e-22
L1CAM	ENSG00000198910.14	L1 cell adhesion molecule	protein_coding	-3.08	6.43	1.0914e-09	1.76453e-13	-0.77	2.35537e-20
CNKSR1	ENSG00000142675.18	connector enhancer of kinase suppressor of Ras 1	protein_coding	-3.09	2.75	7.25381e-14	2.94001e-14	-0.8	7.17362e-23
CYP1A1	ENSG00000140465.14	cytochrome P450 family 1 subfamily A member 1	protein_coding	-3.1	0.94	1.00502e-05	1.46436e-10	-0.67	1.03196e-13
SYNE4	ENSG00000181392.17	spectrin repeat containing nuclear envelope family member 4	protein_coding	-3.12	1.59	3.14098e-16	1.73172e-14	-0.81	8.49624e-24
ADGRV1	ENSG00000164199.18	adhesion G protein-coupled receptor V1	protein_coding	-3.13	3.48	7.38016e-20	6.12994e-14	-0.79	9.25075e-22
TNS4	ENSG00000131746.13	tensin 4	protein_coding	-3.14	1.66	6.88615e-17	8.3305e-14	-0.79	2.47471e-21
ENTPD3	ENSG00000168032.10	ectonucleoside triphosphate diphosphohydrolase 3	protein_coding	-3.21	0.84	6.57852e-16	4.43176e-14	-0.8	3.01616e-22
NLRP10	ENSG00000182261.4	NLR family pyrin domain containing 10	protein_coding	-3.21	-3.55	9.46401e-15	3.81705e-12	-0.73	5.97893e-17
SLC9A2	ENSG00000115616.3	solute carrier family 9 member A2	protein_coding	-3.28	3.83	8.03075e-10	6.12994e-14	-0.79	9.25075e-22
PCDH9	ENSG00000184226.15	protocadherin 9	protein_coding	-3.34	3.82	5.6457e-20	1.21056e-14	-0.82	1.44868e-24
SLC14A1	ENSG00000141469.18	solute carrier family 14 member 1 (Kidd blood group)	protein_coding	-3.34	5.43	6.48204e-17	8.09793e-13	-0.75	1.47319e-18
SCNN1A	ENSG00000111319.13	sodium channel epithelial 1 subunit alpha	protein_coding	-3.51	7.79	1.12552e-17	7.37364e-15	-0.84	1.53211e-26
FAM216B	ENSG00000179813.7	family with sequence similarity 216 member B	protein_coding	-3.54	-3.85	7.98257e-10	0.000177755	-0.4	8.97624e-05
TFAP2C	ENSG00000087510.7	transcription factor AP-2 gamma	protein_coding	-3.57	1.63	5.64946e-10	2.63269e-13	-0.77	7.32832e-20
TMEM45B	ENSG00000151715.8	transmembrane protein 45B	protein_coding	-3.61	4.93	5.94646e-22	7.37364e-15	-0.85	5.75625e-27
TMEM30B	ENSG00000182107.7	transmembrane protein 30B	protein_coding	-3.65	5.31	1.20051e-23	9.71884e-15	-0.83	5.20819e-25
AGR2	ENSG00000106541.12	anterior gradient 2, protein disulphide isomerase family member	protein_coding	-3.83	2.91	3.05011e-09	6.51826e-13	-0.75	8.35585e-19
VTCN1	ENSG00000134258.17	V-set domain containing T cell activation inhibitor 1	protein_coding	-3.9	4.85	3.12405e-12	2.7712e-14	-0.81	5.57477e-23
BMPR1B	ENSG00000138696.11	bone morphogenetic protein receptor type 1B	protein_coding	-4.17	4.53	7.65508e-16	8.52713e-15	-0.83	2.52871e-25
FAM83B	ENSG00000168143.9	family with sequence similarity 83 member B	protein_coding	-4.28	2.7	2.95427e-12	1.06423e-14	-0.83	7.76743e-25
ERVMER34-1	ENSG00000226887.8	endogenous retrovirus group MER34 member 1, envelope	protein_coding	-4.39	3.15	5.00235e-20	7.61042e-15	-0.84	5.983e-26
GRHL2	ENSG00000083307.12	grainyhead like transcription factor 2	protein_coding	-4.73	3.89	6.1771e-13	1.63131e-14	-0.82	6.42742e-24
MUC15	ENSG00000169550.14	mucin 15, cell surface associated	protein_coding	-7.1	5.25	1.867e-19	7.43059e-15	-0.84	2.41676e-26

## Sheet: Table 5_miR-199b-5p
gene	Gene_id	Description	Biotype	LogFC	LogCPM	QLF_FDR	MW_FDR	Spearman_correlation_coef	Spearman_correlation_FDR
TRIB3	ENSG00000101255.11	tribbles pseudokinase 3	protein_coding	2.89	5.11	1.54945e-17	2.13387e-13	0.77	4.13263e-20
SFTPB	ENSG00000168878.19	surfactant protein B	protein_coding	2.75	2.52	0.00114044	1.21485e-11	-0.71	7.62012e-16
AOAH	ENSG00000136250.12	acyloxyacyl hydrolase	protein_coding	2.39	4.17	3.01655e-14	9.13908e-13	0.75	2.00339e-18
LAX1	ENSG00000122188.13	lymphocyte transmembrane adaptor 1	protein_coding	2.35	1.22	7.00012e-12	9.70157e-10	0.64	3.05941e-12
GPR35	ENSG00000178623.12	G protein-coupled receptor 35	protein_coding	2.3	2.1	5.51916e-11	9.67763e-07	0.52	1.18342e-07
C3orf36	ENSG00000288547.3	chromosome 3 putative open reading frame 36	lncRNA	1.98	0.89	4.20326e-09	2.04052e-08	0.59	4.37847e-10
FN1	ENSG00000115414.21	fibronectin 1	protein_coding	1.77	10.44	4.32667e-13	8.42011e-13	0.75	1.63051e-18
COL5A1	ENSG00000130635.16	collagen type V alpha 1 chain	protein_coding	1.74	6.33	4.00488e-08	5.21544e-08	0.57	1.82635e-09
CDCA7	ENSG00000144354.14	cell division cycle associated 7	protein_coding	1.73	1.38	1.30924e-08	1.50379e-11	0.7	1.19773e-15
SLC2A3	ENSG00000059804.16	solute carrier family 2 member 3	protein_coding	1.71	6.4	9.72745e-09	5.40996e-08	0.57	1.92832e-09
CDCA7L	ENSG00000164649.20	cell division cycle associated 7 like	protein_coding	1.68	3.58	1.62538e-17	2.10578e-11	0.7	2.38721e-15
SERPINH1	ENSG00000149257.16	serpin family H member 1	protein_coding	1.6	7.5	2.45801e-16	2.16722e-12	0.73	1.63093e-17
SNAP25	ENSG00000132639.13	synaptosome associated protein 25	protein_coding	1.58	2.3	2.29425e-07	2.80512e-07	0.54	2.11206e-08
GM2A	ENSG00000196743.9	GM2 ganglioside activator	protein_coding	1.55	6.67	9.09897e-24	1.98028e-14	0.81	1.47008e-23
PLXND1	ENSG00000004399.13	plexin D1	protein_coding	1.53	7.55	6.79267e-19	4.09435e-13	0.76	2.45721e-19
AXL	ENSG00000167601.12	AXL receptor tyrosine kinase	protein_coding	1.52	6.41	5.35654e-15	1.21568e-12	0.74	4.07561e-18
HEY1	ENSG00000164683.18	hes related family bHLH transcription factor with YRPW motif 1	protein_coding	1.52	3.83	1.82539e-13	7.656e-10	0.64	2.03041e-12
GRB10	ENSG00000106070.20	growth factor receptor bound protein 10	protein_coding	1.44	7.02	2.3422e-13	8.43639e-12	0.71	3.50723e-16
LMNB1	ENSG00000113368.12	lamin B1	protein_coding	1.35	3.8	1.55419e-10	4.63963e-11	0.69	1.15871e-14
EVL	ENSG00000196405.13	Enah/Vasp-like	protein_coding	1.35	5.45	5.12279e-19	9.40976e-14	0.78	3.57876e-21
INSR	ENSG00000171105.14	insulin receptor	protein_coding	1.32	8.21	5.97001e-13	1.89061e-10	0.67	1.65586e-13
CD44	ENSG00000026508.20	CD44 molecule (Indian blood group)	protein_coding	1.31	7	4.71779e-08	9.86379e-08	0.56	4.69467e-09
MYC	ENSG00000136997.21	MYC proto-oncogene, bHLH transcription factor	protein_coding	1.23	5.75	2.46134e-07	5.8139e-08	0.57	2.14651e-09
SERPINE2	ENSG00000135919.14	serpin family E member 2	protein_coding	1.2	6.73	3.25345e-06	0.00221834	0.34	0.00165006
PLEKHG2	ENSG00000090924.15	pleckstrin homology and RhoGEF domain containing G2	protein_coding	1.19	4.88	4.77295e-18	5.04037e-13	0.76	4.23161e-19
PDE11A	ENSG00000128655.18	phosphodiesterase 11A	protein_coding	1.17	1.84	1.06671e-06	0.00640663	0.3	0.00532653
CORO1C	ENSG00000110880.11	coronin 1C	protein_coding	1.12	7.11	1.0348e-18	3.49073e-13	0.76	1.59208e-19
TRIM59	ENSG00000213186.8	tripartite motif containing 59	protein_coding	1.05	2.21	6.68255e-12	1.07818e-11	0.71	5.95291e-16
COL6A1	ENSG00000142156.15	collagen type VI alpha 1 chain	protein_coding	1	7.84	1.14321e-06	1.0166e-05	0.47	2.64871e-06
QSOX1	ENSG00000116260.17	quiescin sulfhydryl oxidase 1	protein_coding	0.99	7.68	6.03267e-07	0.000252335	0.39	0.000136228
CCND2	ENSG00000118971.9	cyclin D2	protein_coding	0.99	5.58	5.48337e-08	7.95744e-07	0.52	9.04516e-08
MYOF	ENSG00000138119.17	myoferlin	protein_coding	0.99	7.69	2.329e-12	7.45034e-12	0.72	2.6797e-16
EIF4A1	ENSG00000161960.16	eukaryotic translation initiation factor 4A1	protein_coding	0.98	0.13	2.85995e-05	0.00264	0.33	0.00200377
PPM1F	ENSG00000100034.14	protein phosphatase, Mg2+/Mn2+ dependent 1F	protein_coding	0.98	5.67	7.03098e-14	7.02694e-11	0.68	2.58982e-14
FHOD1	ENSG00000135723.14	formin homology 2 domain containing 1	protein_coding	0.97	4.45	3.94686e-15	3.01952e-12	0.73	3.52371e-17
IRF9	ENSG00000213928.9	interferon regulatory factor 9	protein_coding	0.93	0.38	2.36624e-05	0.000272152	0.39	0.000148915
ITGA3	ENSG00000005884.18	integrin subunit alpha 3	protein_coding	0.85	8.43	5.32445e-06	0.000448157	0.38	0.000266668
MICAL3	ENSG00000243156.9	microtubule associated monooxygenase, calponin and LIM domain containing 3	protein_coding	0.85	5.44	4.93002e-09	2.46227e-06	0.5	4.16807e-07
SH3PXD2A	ENSG00000107957.16	SH3 and PX domains 2A	protein_coding	0.84	5.79	4.76673e-10	8.60543e-10	0.64	2.48957e-12
ABCC1	ENSG00000103222.20	ATP binding cassette subfamily C member 1	protein_coding	0.82	6.17	2.1175e-11	1.88044e-09	0.63	9.45374e-12
RASSF3	ENSG00000153179.13	Ras association domain family member 3	protein_coding	0.82	4.99	1.06078e-11	8.66623e-11	0.68	3.8551e-14
ABL2	ENSG00000143322.21	ABL proto-oncogene 2, non-receptor tyrosine kinase	protein_coding	0.8	5.52	6.57999e-14	1.27707e-11	0.71	8.48292e-16
ACTN1	ENSG00000072110.15	actinin alpha 1	protein_coding	0.8	7.41	1.18007e-07	2.90341e-07	0.54	2.21752e-08
AGAP3	ENSG00000133612.19	ArfGAP with GTPase domain, ankyrin repeat and PH domain 3	protein_coding	0.78	5.24	6.98723e-12	5.18039e-12	0.72	1.19202e-16
C19orf48	ENSG00000167747.15	chromosome 19 open reading frame 48	transcribed_unitary_pseudogene	0.77	4.58	3.53634e-08	4.861e-08	0.57	1.64259e-09
CCSAP	ENSG00000154429.11	centriole, cilia and spindle associated protein	protein_coding	0.75	2.95	1.16055e-07	7.29596e-06	0.48	1.72948e-06
RCC1	ENSG00000180198.16	regulator of chromosome condensation 1	protein_coding	0.74	4.38	8.20796e-06	3.55013e-05	0.44	1.27728e-05
PLXNA1	ENSG00000114554.11	plexin A1	protein_coding	0.73	5.53	3.68574e-08	3.81436e-07	0.53	3.25691e-08
GIT1	ENSG00000108262.16	GIT ArfGAP 1	protein_coding	0.72	5.99	5.42239e-12	6.10065e-12	0.72	1.71597e-16
SEMA4C	ENSG00000168758.11	semaphorin 4C	protein_coding	0.71	5.31	2.07229e-08	2.27399e-08	0.59	5.17916e-10
ZNF611	ENSG00000213020.10	zinc finger protein 611	protein_coding	0.69	4.59	3.36914e-07	0.000142779	0.41	6.93282e-05
VASP	ENSG00000125753.14	vasodilator stimulated phosphoprotein	protein_coding	0.67	6.29	8.107e-09	9.52749e-08	0.56	4.46085e-09
TSPO	ENSG00000100300.18	translocator protein	protein_coding	0.64	5.94	0.000124075	7.75299e-06	0.47	1.87055e-06
SLC30A7	ENSG00000162695.12	solute carrier family 30 member 7	protein_coding	0.63	5.7	7.7716e-10	3.76524e-09	0.62	2.98939e-11
JAG1	ENSG00000101384.12	jagged canonical Notch ligand 1	protein_coding	0.62	7.66	1.79437e-06	3.45013e-05	0.44	1.23309e-05
PON2	ENSG00000105854.13	paraoxonase 2	protein_coding	0.62	6.23	0.000201557	0.0034767	0.32	0.00272043
ARHGAP17	ENSG00000140750.17	Rho GTPase activating protein 17	protein_coding	0.6	5.68	7.4304e-16	4.26177e-13	0.76	2.73709e-19
TMOD2	ENSG00000128872.10	tropomodulin 2	protein_coding	0.59	4.76	4.39199e-06	6.38106e-05	0.43	2.6238e-05
PLEC	ENSG00000178209.16	plectin	protein_coding	0.57	8.24	9.00213e-05	1.73359e-06	0.51	2.60759e-07
FKBP15	ENSG00000119321.9	FKBP prolyl isomerase 15	protein_coding	0.55	5.79	3.23509e-12	3.46075e-10	0.66	4.97805e-13
MGAT4B	ENSG00000161013.17	alpha-1,3-mannosyl-glycoprotein 4-beta-N-acetylglucosaminyltransferase B	protein_coding	0.55	6.95	1.42495e-06	1.42885e-06	0.51	2.00995e-07
SKI	ENSG00000157933.10	SKI proto-oncogene	protein_coding	0.53	6.49	4.26906e-07	2.11802e-05	0.45	6.71482e-06
ZCCHC2	ENSG00000141664.10	zinc finger CCHC-type containing 2	protein_coding	0.53	4.47	4.33346e-09	3.04573e-08	0.58	8.09739e-10
DDHD1	ENSG00000100523.16	DDHD domain containing 1	protein_coding	0.5	3.84	7.67497e-08	2.13151e-07	0.55	1.42886e-08
LMLN	ENSG00000185621.11	leishmanolysin like peptidase	protein_coding	0.5	3.83	2.35895e-07	9.86608e-06	0.47	2.54866e-06
CTSB	ENSG00000164733.22	cathepsin B	protein_coding	0.49	10.31	0.00599091	0.00402298	0.32	0.00319622
EEF1D	ENSG00000104529.17	eukaryotic translation elongation factor 1 delta	protein_coding	0.48	5.41	2.83542e-07	1.63136e-08	0.59	3.101e-10
RPS4X	ENSG00000198034.11	ribosomal protein S4 X-linked	protein_coding	0.48	9.82	1.08129e-05	0.000544786	0.37	0.000334371
TXNDC12	ENSG00000117862.13	thioredoxin domain containing 12	protein_coding	0.47	2.27	6.62893e-06	7.19119e-08	0.57	2.945e-09
ADARB1	ENSG00000197381.16	adenosine deaminase RNA specific B1	protein_coding	0.44	4.96	0.000147518	0.00293719	0.33	0.00225583
KHNYN	ENSG00000100441.10	KH and NYN domain containing	protein_coding	0.44	5.24	1.06675e-06	5.41246e-05	0.43	2.14529e-05
ZNF768	ENSG00000169957.10	zinc finger protein 768	protein_coding	0.43	5.44	0.000111301	0.00203115	0.34	0.00149509
CNIH4	ENSG00000143771.12	cornichon family AMPA receptor auxiliary protein 4	protein_coding	0.42	5.54	6.23171e-08	2.2386e-06	0.5	3.67193e-07
FOXJ2	ENSG00000065970.9	forkhead box J2	protein_coding	0.41	5.16	9.69324e-08	4.5167e-07	0.53	4.12643e-08
LAMB2	ENSG00000172037.14	laminin subunit beta 2	protein_coding	0.41	8.64	0.00111925	0.00419317	0.32	0.0033462
NAA15	ENSG00000164134.13	N-alpha-acetyltransferase 15, NatA auxiliary subunit	protein_coding	0.4	5.34	3.37436e-06	5.33616e-07	0.53	5.20806e-08
CEP120	ENSG00000168944.17	centrosomal protein 120	protein_coding	0.38	5.12	5.02613e-05	0.000817159	0.36	0.000533071
BTAF1	ENSG00000095564.14	B-TFIID TATA-box binding protein associated factor 1	protein_coding	0.37	5.13	7.37753e-05	0.000494513	0.38	0.000298851
EDEM1	ENSG00000134109.11	ER degradation enhancing alpha-mannosidase like protein 1	protein_coding	0.36	6	1.95583e-06	5.04692e-06	0.48	1.07288e-06
FAM189B	ENSG00000160767.21	family with sequence similarity 189 member B	protein_coding	0.35	4.77	8.60273e-05	3.35542e-05	0.44	1.19115e-05
CAD	ENSG00000084774.14	carbamoyl-phosphate synthetase 2, aspartate transcarbamylase, and dihydroorotase	protein_coding	0.34	5.13	0.00140733	0.000856289	0.36	0.000562433
IMP3	ENSG00000177971.8	IMP U3 small nucleolar ribonucleoprotein 3	protein_coding	0.34	4.37	5.77215e-05	0.000166984	0.4	8.35819e-05
APEX1	ENSG00000100823.12	apurinic/apyrimidinic endodeoxyribonuclease 1	protein_coding	0.34	6.68	0.000132566	0.0015906	0.35	0.00113594
ATF7IP	ENSG00000171681.12	activating transcription factor 7 interacting protein	protein_coding	0.34	6.71	7.61138e-05	1.40804e-05	0.46	4.01129e-06
ZNF195	ENSG00000005801.18	zinc finger protein 195	protein_coding	0.33	4.3	7.74129e-06	1.21325e-06	0.51	1.61147e-07
ZDHHC9	ENSG00000188706.13	zinc finger DHHC-type palmitoyltransferase 9	protein_coding	0.33	6.6	0.00433994	0.0189069	0.27	0.0171229
P2RY11	ENSG00000244165.2	purinergic receptor P2Y11	protein_coding	0.33	0.71	0.0180944	0.0494764	0.23	0.0472746
TMEM18	ENSG00000151353.15	transmembrane protein 18	protein_coding	0.33	4.81	2.08765e-05	0.000109688	0.42	5.0547e-05
E2F3	ENSG00000112242.15	E2F transcription factor 3	protein_coding	0.32	4.18	0.0114509	0.0111865	0.28	0.00975511
RIC8A	ENSG00000177963.14	RIC8 guanine nucleotide exchange factor A	protein_coding	0.32	6.56	1.65523e-05	2.19141e-08	0.59	4.89356e-10
ZNF525	ENSG00000203326.12	zinc finger protein 525	protein_coding	0.32	3.16	0.000747999	0.000798281	0.36	0.000519012
HNRNPA1	ENSG00000135486.19	heterogeneous nuclear ribonucleoprotein A1	protein_coding	0.32	8.89	5.77586e-06	2.37776e-05	0.45	7.76124e-06
TARS1	ENSG00000113407.14	threonyl-tRNA synthetase 1	protein_coding	0.3	6.14	8.66756e-05	0.00050664	0.38	0.000307318
ZNF394	ENSG00000160908.15	zinc finger protein 394	protein_coding	0.29	4.19	3.76255e-06	1.55847e-07	0.55	9.11913e-09
NFATC2IP	ENSG00000176953.12	nuclear factor of activated T cells 2 interacting protein	protein_coding	0.29	4.78	1.01848e-06	1.13785e-06	0.51	1.47646e-07
ELP2	ENSG00000134759.14	elongator acetyltransferase complex subunit 2	protein_coding	0.29	6.27	4.317e-05	0.000118716	0.41	5.55887e-05
LARP1	ENSG00000155506.18	La ribonucleoprotein 1, translational regulator	protein_coding	0.28	7.92	0.000870481	0.00281574	0.33	0.00215277
DDX19B	ENSG00000157349.17	DEAD-box helicase 19B	protein_coding	0.27	3.84	0.000121873	1.45009e-05	0.46	4.16378e-06
MTA1	ENSG00000182979.18	metastasis associated 1	protein_coding	0.27	4.26	0.014422	0.00603296	0.3	0.00498782
CPSF1	ENSG00000071894.17	cleavage and polyadenylation specific factor 1	protein_coding	0.27	5.56	0.0125429	0.000629173	0.37	0.000394854
ZNF507	ENSG00000168813.17	zinc finger protein 507	protein_coding	0.27	4.66	0.00284886	0.00410455	0.32	0.00326836
SF3B3	ENSG00000189091.13	splicing factor 3b subunit 3	protein_coding	0.24	7.33	0.000773615	0.00103167	0.36	0.000695592
BAZ2A	ENSG00000076108.12	bromodomain adjacent to zinc finger domain 2A	protein_coding	0.24	6.98	0.00556362	0.00445792	0.31	0.00357943
FXR1	ENSG00000114416.18	FMR1 autosomal homolog 1	protein_coding	0.22	6.74	0.00214021	0.00231808	0.33	0.00173313
TRIM11	ENSG00000154370.16	tripartite motif containing 11	protein_coding	0.22	3.5	0.0118808	0.00569193	0.31	0.00468006
ARCN1	ENSG00000095139.14	archain 1	protein_coding	0.21	7.58	5.75836e-05	0.00021096	0.4	0.000110259
HDGF	ENSG00000143321.19	heparin binding growth factor	protein_coding	0.18	8.01	0.0263947	0.0294275	0.25	0.0273862
GGA3	ENSG00000125447.18	golgi associated, gamma adaptin ear containing, ARF binding protein 3	protein_coding	0.18	4.89	0.0103875	0.00181807	0.34	0.00132033
CSTF1	ENSG00000101138.12	cleavage stimulation factor subunit 1	protein_coding	0.17	5.03	0.00332765	0.000341521	0.39	0.000194282
COPB2	ENSG00000184432.11	COPI coat complex subunit beta 2	protein_coding	0.15	7.46	0.0368117	0.0458051	0.23	0.0436092
DYRK1A	ENSG00000157540.22	dual specificity tyrosine phosphorylation regulated kinase 1A	protein_coding	-0.15	6.26	0.0176399	0.00436818	-0.32	0.00350051
RPL15	ENSG00000174748.22	ribosomal protein L15	protein_coding	-0.16	9.24	0.0358756	0.00123948	-0.35	0.000856996
HNRNPU	ENSG00000153187.20	heterogeneous nuclear ribonucleoprotein U	protein_coding	-0.17	8.8	0.0174675	0.00474471	-0.31	0.00383353
UNC50	ENSG00000115446.12	unc-50 inner nuclear membrane RNA binding protein	protein_coding	-0.17	5	0.00185819	9.01565e-06	-0.47	2.27106e-06
CD59	ENSG00000085063.17	CD59 molecule (CD59 blood group)	protein_coding	-0.18	9.03	0.0235582	0.00333306	-0.32	0.00259627
PAFAH1B2	ENSG00000168092.14	platelet activating factor acetylhydrolase 1b catalytic subunit 2	protein_coding	-0.19	6.89	0.00802505	0.00666012	-0.3	0.00555672
TNRC6B	ENSG00000100354.21	trinucleotide repeat containing adaptor 6B	protein_coding	-0.19	5.53	0.0473414	0.0472511	-0.23	0.0450523
RBM14	ENSG00000239306.5	RNA binding motif protein 14	protein_coding	-0.19	5.19	0.00721331	0.00455219	-0.31	0.00366288
CAPRIN1	ENSG00000135387.21	cell cycle associated protein 1	protein_coding	-0.2	8.04	0.0024668	0.00145331	-0.35	0.001026
ZBTB40	ENSG00000184677.18	zinc finger and BTB domain containing 40	protein_coding	-0.2	5.19	0.0462635	0.0451003	-0.23	0.0429071
VCPKMT	ENSG00000100483.14	valosin containing protein lysine methyltransferase	protein_coding	-0.2	2.06	0.0393969	0.00207716	-0.34	0.0015331
CLTC	ENSG00000141367.12	clathrin heavy chain	protein_coding	-0.21	9.15	0.00485068	0.00115682	-0.35	0.000792334
ZBTB5	ENSG00000168795.5	zinc finger and BTB domain containing 5	protein_coding	-0.21	4.41	0.0122008	0.00536014	-0.31	0.00438243
CBX5	ENSG00000094916.16	chromobox 5	protein_coding	-0.21	7.64	0.0348414	0.0423664	-0.23	0.0401932
KIF1B	ENSG00000054523.18	kinesin family member 1B	protein_coding	-0.23	6.67	0.0296639	0.0179205	-0.27	0.0161741
ZNF846	ENSG00000196605.7	zinc finger protein 846	protein_coding	-0.24	2.28	0.0301952	0.00138971	-0.35	0.000975348
PCGF5	ENSG00000180628.15	polycomb group ring finger 5	protein_coding	-0.24	6.91	0.0121338	0.000200355	-0.4	0.000103747
UBE2G1	ENSG00000132388.12	ubiquitin conjugating enzyme E2 G1	protein_coding	-0.25	5.6	0.000426836	1.18048e-05	-0.47	3.20522e-06
PDE4D	ENSG00000113448.19	phosphodiesterase 4D	protein_coding	-0.26	5.98	0.0446432	0.00876651	-0.29	0.00749281
UBE2H	ENSG00000186591.13	ubiquitin conjugating enzyme E2 H	protein_coding	-0.27	7.44	0.00130785	4.2047e-05	-0.44	1.5741e-05
ZBTB37	ENSG00000185278.15	zinc finger and BTB domain containing 37	protein_coding	-0.28	4.38	0.00350994	0.00138971	-0.35	0.000975348
WASL	ENSG00000106299.8	WASP like actin nucleation promoting factor	protein_coding	-0.28	7.04	0.000338249	3.26629e-06	-0.49	6.06328e-07
KIF5B	ENSG00000170759.11	kinesin family member 5B	protein_coding	-0.3	7.51	0.000216437	2.99332e-05	-0.45	1.03388e-05
TMEM97	ENSG00000109084.14	transmembrane protein 97	protein_coding	-0.3	4.05	0.0268277	0.0472511	-0.23	0.0450523
MORF4L1	ENSG00000185787.15	mortality factor 4 like 1	protein_coding	-0.31	7.98	1.3417e-06	3.00347e-07	-0.54	2.32666e-08
EIPR1	ENSG00000032389.13	EARP complex and GARP complex interacting protein 1	protein_coding	-0.31	4.76	0.00199759	0.000293581	-0.39	0.000162765
PIGO	ENSG00000165282.14	phosphatidylinositol glycan anchor biosynthesis class O	protein_coding	-0.32	5.69	0.00067562	0.000544786	-0.37	0.000334371
SESN2	ENSG00000130766.5	sestrin 2	protein_coding	-0.35	5.15	0.0478668	0.0367875	-0.24	0.0346337
TAF6L	ENSG00000162227.8	TATA-box binding protein associated factor 6 like	protein_coding	-0.35	2.89	8.42853e-05	2.88061e-06	-0.5	5.13482e-07
COMT	ENSG00000093010.15	catechol-O-methyltransferase	protein_coding	-0.35	6.43	0.00321586	0.000518936	-0.38	0.000316095
PANK3	ENSG00000120137.7	pantothenate kinase 3	protein_coding	-0.37	6.35	4.45238e-05	4.67027e-07	-0.53	4.32402e-08
OXSR1	ENSG00000172939.9	oxidative stress responsive kinase 1	protein_coding	-0.38	6.08	1.01999e-08	4.38192e-09	-0.61	3.83214e-11
RNF11	ENSG00000123091.5	ring finger protein 11	protein_coding	-0.38	7.25	1.13585e-06	1.00965e-09	-0.64	3.27574e-12
MDC1	ENSG00000137337.15	mediator of DNA damage checkpoint 1	protein_coding	-0.39	5.11	7.99076e-05	4.32728e-05	-0.44	1.63053e-05
KIZ	ENSG00000088970.16	kizuna centrosomal protein	protein_coding	-0.39	4.42	0.000254109	0.00126696	-0.35	0.000878666
FARP2	ENSG00000006607.14	FERM, ARH/RhoGEF and pleckstrin domain protein 2	protein_coding	-0.41	4.95	7.32131e-05	8.27831e-08	-0.56	3.62717e-09
AGPAT2	ENSG00000169692.13	1-acylglycerol-3-phosphate O-acyltransferase 2	protein_coding	-0.41	5.69	0.0112839	7.12316e-05	-0.43	2.99944e-05
YAP1	ENSG00000137693.14	Yes1 associated transcriptional regulator	protein_coding	-0.42	6.88	2.46141e-06	2.79157e-06	-0.5	4.92594e-07
BAHD1	ENSG00000140320.12	bromo adjacent homology domain containing 1	protein_coding	-0.42	5.11	1.92674e-05	1.25363e-06	-0.51	1.68451e-07
RTN4	ENSG00000115310.18	reticulon 4	protein_coding	-0.42	9.03	7.23092e-06	2.56829e-09	-0.62	1.58909e-11
RALGAPA2	ENSG00000188559.15	Ral GTPase activating protein catalytic subunit alpha 2	protein_coding	-0.42	5.99	0.000216056	1.67828e-05	-0.46	5.01027e-06
ZBTB8A	ENSG00000160062.15	zinc finger and BTB domain containing 8A	protein_coding	-0.42	2.53	0.000765672	0.000386913	-0.38	0.000224728
ENTPD4	ENSG00000197217.13	ectonucleoside triphosphate diphosphohydrolase 4	protein_coding	-0.43	5.2	9.90878e-06	6.02171e-08	-0.57	2.26242e-09
RALGAPB	ENSG00000170471.15	Ral GTPase activating protein non-catalytic subunit beta	protein_coding	-0.45	6.57	1.33838e-08	9.3239e-09	-0.6	1.28961e-10
KCTD12	ENSG00000178695.6	potassium channel tetramerization domain containing 12	protein_coding	-0.45	7.86	0.00540504	0.000437537	-0.38	0.000259336
NLK	ENSG00000087095.13	nemo like kinase	protein_coding	-0.46	5.35	1.21529e-07	1.81147e-09	-0.63	8.86912e-12
LSS	ENSG00000160285.15	lanosterol synthase	protein_coding	-0.47	5.11	1.24253e-05	5.70243e-07	-0.53	5.71214e-08
HECTD1	ENSG00000092148.13	HECT domain E3 ubiquitin protein ligase 1	protein_coding	-0.47	7.31	1.6596e-06	6.30193e-07	-0.53	6.56076e-08
ZMPSTE24	ENSG00000084073.10	zinc metallopeptidase STE24	protein_coding	-0.48	6.7	3.15262e-11	2.19261e-11	-0.7	2.59634e-15
ZNF669	ENSG00000188295.15	zinc finger protein 669	protein_coding	-0.5	2	1.54985e-05	5.20185e-06	-0.48	1.11618e-06
LMO4	ENSG00000143013.13	LIM domain only 4	protein_coding	-0.5	5.11	1.29436e-05	2.10177e-06	-0.5	3.37477e-07
CUL3	ENSG00000036257.13	cullin 3	protein_coding	-0.51	6.07	7.1885e-10	4.95663e-10	-0.65	9.45284e-13
ZNF286B	ENSG00000249459.11	zinc finger protein 286B (pseudogene)	transcribed_unprocessed_pseudogene	-0.52	0.15	0.000910825	0.000316617	-0.39	0.000177831
NIPAL3	ENSG00000001461.17	NIPA like domain containing 3	protein_coding	-0.53	6.43	0.000184315	0.00525215	-0.31	0.00428602
GATA6	ENSG00000141448.11	GATA binding protein 6	protein_coding	-0.54	2.09	0.0073422	0.003193	-0.32	0.00247594
SETD2	ENSG00000181555.21	SET domain containing 2, histone lysine methyltransferase	protein_coding	-0.54	6.3	2.73598e-08	9.20115e-08	-0.56	4.23767e-09
APLP2	ENSG00000084234.18	amyloid beta precursor like protein 2	protein_coding	-0.54	10.08	1.10811e-11	1.10707e-10	-0.67	6.13815e-14
MIB1	ENSG00000101752.12	mindbomb E3 ubiquitin protein ligase 1	protein_coding	-0.56	6.24	2.56035e-07	1.96653e-08	-0.59	4.1368e-10
PNPO	ENSG00000108439.11	pyridoxamine 5'-phosphate oxidase	protein_coding	-0.57	5.04	7.3263e-07	3.93839e-06	-0.49	7.75698e-07
AUNIP	ENSG00000127423.11	aurora kinase A and ninein interacting protein	protein_coding	-0.57	-0.61	0.000275333	2.19141e-08	-0.59	4.89356e-10
USP24	ENSG00000162402.14	ubiquitin specific peptidase 24	protein_coding	-0.58	6.78	1.31206e-08	2.62001e-07	-0.54	1.91706e-08
RANBP6	ENSG00000137040.10	RAN binding protein 6	protein_coding	-0.58	5.17	1.58619e-09	5.58151e-10	-0.65	1.16649e-12
DICER1	ENSG00000100697.15	dicer 1, ribonuclease III	protein_coding	-0.59	6.32	4.21271e-09	1.81147e-09	-0.63	8.86912e-12
APP	ENSG00000142192.21	amyloid beta precursor protein	protein_coding	-0.6	11.16	1.41875e-07	4.32627e-06	-0.49	8.77142e-07
SMARCE1	ENSG00000073584.20	SWI/SNF related, matrix associated, actin dependent regulator of chromatin, subfamily e, member 1	protein_coding	-0.61	3.29	1.25997e-08	1.67809e-09	-0.63	7.78964e-12
WDTC1	ENSG00000142784.16	WD and tetratricopeptide repeats 1	protein_coding	-0.61	6.66	2.92273e-11	4.18804e-12	-0.72	7.45805e-17
CHCHD4	ENSG00000163528.13	coiled-coil-helix-coiled-coil-helix domain containing 4	protein_coding	-0.64	3.78	3.83236e-14	8.7903e-12	-0.71	3.83341e-16
OSBPL2	ENSG00000130703.17	oxysterol binding protein like 2	protein_coding	-0.64	5.78	3.79689e-16	1.37654e-12	-0.74	5.51284e-18
DNAJC16	ENSG00000116138.13	DnaJ heat shock protein family (Hsp40) member C16	protein_coding	-0.66	5.62	1.59945e-07	9.28366e-06	-0.47	2.35853e-06
TFDP2	ENSG00000114126.18	transcription factor Dp-2	protein_coding	-0.67	6.26	3.61795e-08	2.44579e-08	-0.58	5.79312e-10
NDUFS2	ENSG00000158864.13	NADH:ubiquinone oxidoreductase core subunit S2	protein_coding	-0.67	7.1	1.02837e-12	9.80449e-11	-0.68	4.87282e-14
KIAA0895	ENSG00000164542.13	KIAA0895	protein_coding	-0.67	4.27	5.15757e-08	1.38212e-09	-0.63	5.60372e-12
FBXO33	ENSG00000165355.7	F-box protein 33	protein_coding	-0.67	4.08	8.51923e-11	1.00965e-09	-0.64	3.27574e-12
HES1	ENSG00000114315.4	hes family bHLH transcription factor 1	protein_coding	-0.71	6	0.000137966	8.1643e-05	-0.42	3.53908e-05
ALDH5A1	ENSG00000112294.14	aldehyde dehydrogenase 5 family member A1	protein_coding	-0.71	5.86	7.54333e-06	1.4935e-09	-0.63	6.39441e-12
SYNE1	ENSG00000131018.24	spectrin repeat containing nuclear envelope protein 1	protein_coding	-0.73	7.75	1.01502e-07	1.02144e-07	-0.56	4.94153e-09
WDR6	ENSG00000178252.18	WD repeat domain 6	protein_coding	-0.74	6.73	1.3128e-10	1.38514e-11	-0.71	1.00791e-15
EPB41L1	ENSG00000088367.23	erythrocyte membrane protein band 4,1 like 1	protein_coding	-0.76	7.43	1.18861e-13	1.21568e-12	-0.74	4.07561e-18
PPP1R9A	ENSG00000158528.12	protein phosphatase 1 regulatory subunit 9A	protein_coding	-0.76	4.98	1.35142e-07	1.38212e-09	-0.63	5.60372e-12
SORL1	ENSG00000137642.13	sortilin related receptor 1	protein_coding	-0.81	8.14	1.00286e-05	1.06653e-06	-0.52	1.35169e-07
PLGRKT	ENSG00000107020.10	plasminogen receptor with a C-terminal lysine	protein_coding	-0.82	4.25	5.11303e-12	2.10578e-11	-0.7	2.38721e-15
ZNF772	ENSG00000197128.12	zinc finger protein 772	protein_coding	-0.83	3.48	5.6149e-08	8.0266e-09	-0.6	1.0162e-10
ZNF10	ENSG00000256223.6	zinc finger protein 10	protein_coding	-0.84	3.34	2.97346e-13	4.03427e-12	-0.73	6.82034e-17
ZNF460	ENSG00000197714.9	zinc finger protein 460	protein_coding	-0.86	1.35	3.81073e-08	6.94028e-08	-0.57	2.79411e-09
RBM47	ENSG00000163694.15	RNA binding motif protein 47	protein_coding	-0.87	7.73	1.21277e-14	1.84651e-12	-0.74	1.10893e-17
ZNF844	ENSG00000223547.10	zinc finger protein 844	protein_coding	-0.91	3.96	2.47078e-09	1.51786e-08	-0.59	2.76886e-10
FDFT1	ENSG00000079459.13	farnesyl-diphosphate farnesyltransferase 1	protein_coding	-0.91	6.6	1.45853e-14	3.28279e-14	-0.8	1.06589e-22
LTBP1	ENSG00000049323.16	latent transforming growth factor beta binding protein 1	protein_coding	-0.91	6.77	0.000143813	0.0150401	-0.27	0.0134064
PLS3	ENSG00000102024.18	plastin 3	protein_coding	-0.93	7.89	2.48591e-15	5.23522e-13	-0.76	4.69584e-19
PODXL	ENSG00000128567.17	podocalyxin like	protein_coding	-0.95	9.26	6.82675e-05	0.000779655	-0.37	0.000505161
GK5	ENSG00000175066.16	glycerol kinase 5	protein_coding	-0.95	4.34	4.2211e-13	3.57043e-12	-0.73	5.15717e-17
SLIT2	ENSG00000145147.20	slit guidance ligand 2	protein_coding	-0.96	5.09	0.0231041	1.36679e-05	-0.46	3.86338e-06
PRKCA	ENSG00000154229.12	protein kinase C alpha	protein_coding	-0.99	6.18	1.00056e-12	2.58784e-11	-0.7	3.63625e-15
ZNF433	ENSG00000197647.11	zinc finger protein 433	protein_coding	-1.05	2.48	4.12922e-13	4.6475e-13	-0.76	3.41486e-19
ATP6V1H	ENSG00000047249.18	ATPase H+ transporting V1 subunit H	protein_coding	-1.07	6.37	2.12689e-21	1.05572e-13	-0.78	5.12065e-21
SLC8A1	ENSG00000183023.18	solute carrier family 8 member A1	protein_coding	-1.09	5.96	8.60544e-05	0.0270744	-0.25	0.0250747
HIF1A	ENSG00000100644.17	hypoxia inducible factor 1 subunit alpha	protein_coding	-1.18	8.06	2.17063e-10	3.19396e-10	-0.66	4.30851e-13
COL19A1	ENSG00000082293.13	collagen type XIX alpha 1 chain	protein_coding	-1.22	1.03	0.00150728	0.00810664	-0.3	0.00688384
ERBB2	ENSG00000141736.14	erb-b2 receptor tyrosine kinase 2	protein_coding	-1.24	8.01	6.55496e-15	3.2182e-13	-0.76	1.27696e-19
SLC16A10	ENSG00000112394.17	solute carrier family 16 member 10	protein_coding	-1.26	3.85	4.8124e-06	8.27785e-10	-0.64	2.32698e-12
LAMC2	ENSG00000058085.15	laminin subunit gamma 2	protein_coding	-1.28	5.51	0.000858903	1.90944e-06	-0.5	2.96829e-07
VAV3	ENSG00000134215.16	vav guanine nucleotide exchange factor 3	protein_coding	-1.3	7.09	2.73253e-14	1.51266e-13	-0.78	1.48915e-20
TMEM164	ENSG00000157600.12	transmembrane protein 164	protein_coding	-1.33	5.73	3.63662e-24	2.03084e-14	-0.81	1.66973e-23
CCN2	ENSG00000118523.6	cellular communication network factor 2	protein_coding	-1.45	8.26	2.36872e-09	1.33044e-09	-0.63	5.24824e-12
LDLR	ENSG00000130164.14	low density lipoprotein receptor	protein_coding	-1.49	5.07	7.02589e-09	1.16729e-08	-0.6	1.83818e-10
ACADSB	ENSG00000196177.13	acyl-CoA dehydrogenase short/branched chain	protein_coding	-1.72	7	5.85903e-15	3.57043e-12	-0.73	5.15717e-17
PLPP4	ENSG00000203805.11	phospholipid phosphatase 4	protein_coding	-2.36	2.27	1.3099e-08	3.10007e-13	-0.77	1.14675e-19
IL1RL1	ENSG00000115602.17	interleukin 1 receptor like 1	protein_coding	-2.92	4.79	1.44158e-11	9.04264e-11	-0.68	4.17467e-14
C1orf226	ENSG00000239887.6	chromosome 1 open reading frame 226	protein_coding	-3.12	3.78	1.749e-25	7.61042e-15	-0.84	7.85369e-26
FAM167A	ENSG00000154319.16	family with sequence similarity 167 member A	protein_coding	-3.43	4.3	6.8776e-20	9.60087e-15	-0.83	4.57618e-25
NAT8L	ENSG00000185818.8	N-acetyltransferase 8 like	protein_coding	-5.4	5.08	6.95885e-21	7.61042e-15	-0.84	8.86797e-26
AC092835,1	ENSG00000233757.6	novel C2H2 type zinc finger protein	-0.39	-0.27	0.00488775	0.00099177	-0.32	0.000769046

## Sheet: Table 6_miR-642a-5p
Gene name	Gene id	Description	Biotype	LogFC	LogCPM	QLF_FDR	MW_FDR	Spearman_correlation_coef	Spearman_correlation_FDR
NAT8L	ENSG00000185818.8	N-acetyltransferase 8 like	protein_coding	-5.4	5.08	6.95885e-21	7.61042e-15	-0.84	8.86797e-26
GPC5	ENSG00000179399.15	glypican 5	protein_coding	-5.08	2.89	1.65906e-22	5.97276e-15	-0.85	1.39606e-27
PLEKHG4B	ENSG00000153404.14	pleckstrin homology and RhoGEF domain containing G4B	protein_coding	-3.42	2.69	2.91677e-13	3.90612e-09	-0.62	3.17763e-11
PSG4	ENSG00000243137.8	pregnancy specific beta-1-glycoprotein 4	protein_coding	-3.03	0.21	1.73762e-06	1.77542e-06	-0.5	2.69124e-07
SLC22A6	ENSG00000197901.12	solute carrier family 22 member 6	protein_coding	-2.91	7.11	4.64892e-05	0.000239913	-0.4	0.000128331
WNT4	ENSG00000162552.15	Wnt family member 4	protein_coding	-2.87	1.28	1.00403e-09	5.94928e-11	-0.68	1.8805e-14
CLIC5	ENSG00000112782.19	chloride intracellular channel 5	protein_coding	-2.83	6.83	2.21504e-10	2.80512e-07	-0.54	2.11206e-08
KSR2	ENSG00000171435.14	kinase suppressor of ras 2	protein_coding	-2.65	3.24	4.3242e-12	2.94001e-14	-0.8	7.17362e-23
NEXMIF	ENSG00000050030.16	neurite extension and migration factor	protein_coding	-2.61	2.53	6.4707e-09	2.13387e-13	-0.77	4.13263e-20
KCNE1	ENSG00000180509.12	potassium voltage-gated channel subfamily E regulatory subunit 1	protein_coding	-2.42	-0.21	4.47571e-13	3.472e-11	-0.69	6.53366e-15
RGS6	ENSG00000182732.18	regulator of G protein signaling 6	protein_coding	-2.4	0.85	2.81586e-12	9.52435e-13	-0.75	2.22042e-18
SIX3	ENSG00000138083.5	SIX homeobox 3	protein_coding	-2.21	-2.63	2.33939e-06	1.13782e-11	-0.71	6.65928e-16
PKHD1L1	ENSG00000205038.12	PKHD1 like 1	protein_coding	-2.14	0.56	1.88228e-10	1.16336e-12	-0.74	3.67367e-18
WT1	ENSG00000184937.16	WT1 transcription factor	protein_coding	-1.91	3.87	0.000204	2.46227e-06	-0.5	4.16807e-07
ZFHX2	ENSG00000136367.14	zinc finger homeobox 2	protein_coding	-1.88	2.56	3.75189e-21	3.80216e-14	-0.8	1.79432e-22
MRPS6	ENSG00000243927.6	mitochondrial ribosomal protein S6	protein_coding	-1.66	6.1	4.9502e-12	5.71554e-09	-0.61	5.89573e-11
SCUBE3	ENSG00000146197.9	signal peptide, CUB domain and EGF like domain containing 3	protein_coding	-1.66	3.12	9.23382e-09	3.56475e-07	-0.54	2.96125e-08
CDKN1C	ENSG00000129757.14	cyclin dependent kinase inhibitor 1C	protein_coding	-1.62	5.51	8.98452e-13	5.7106e-11	-0.68	1.73632e-14
TRNP1	ENSG00000253368.4	TMF1 regulated nuclear protein 1	protein_coding	-1.62	3.79	6.20257e-06	2.60974e-10	-0.66	2.99069e-13
PITPNM3	ENSG00000091622.16	PITPNM family member 3	protein_coding	-1.59	2.54	1.49923e-11	3.71772e-12	-0.73	5.66054e-17
PIGR	ENSG00000162896.6	polymeric immunoglobulin receptor	protein_coding	-1.5	8.63	0.0034132	3.11415e-09	-0.62	2.18568e-11
LLGL2	ENSG00000073350.14	LLGL scribble cell polarity complex component 2	protein_coding	-1.49	6.22	2.41882e-19	3.91449e-14	-0.8	2.02587e-22
LDLR	ENSG00000130164.14	low density lipoprotein receptor	protein_coding	-1.49	5.07	7.02589e-09	1.16729e-08	-0.6	1.83818e-10
C1orf210	ENSG00000253313.6	chromosome 1 open reading frame 210	protein_coding	-1.49	4.26	1.9931e-08	1.974e-13	-0.77	3.29789e-20
ZNF488	ENSG00000265763.4	zinc finger protein 488	protein_coding	-1.47	0.93	0.00555635	1.32852e-11	-0.71	9.23727e-16
FAM43B	ENSG00000183114.8	family with sequence similarity 43 member B	protein_coding	-1.47	0.97	4.04541e-06	4.05715e-09	-0.62	3.38141e-11
AK3	ENSG00000147853.17	adenylate kinase 3	protein_coding	-1.46	7.01	3.00408e-22	2.58081e-14	-0.81	4.27152e-23
PLCXD3	ENSG00000182836.10	phosphatidylinositol specific phospholipase C X domain containing 3	protein_coding	-1.43	3.93	0.00074728	2.83357e-10	-0.66	3.46758e-13
ADGRL1	ENSG00000072071.16	adhesion G protein-coupled receptor L1	protein_coding	-1.35	4.77	2.01022e-13	4.36804e-12	-0.72	8.1916e-17
SUSD1	ENSG00000106868.17	sushi domain containing 1	protein_coding	-1.33	4.97	2.97436e-13	2.16722e-12	-0.73	1.63093e-17
ADAM33	ENSG00000149451.18	ADAM metallopeptidase domain 33	protein_coding	-1.32	-0.13	0.00100574	9.50437e-08	-0.56	4.44046e-09
TMEM151B	ENSG00000178233.18	transmembrane protein 151B	protein_coding	-1.3	-3.39	0.000291731	0.000133987	-0.41	6.42484e-05
OLFM2	ENSG00000105088.8	olfactomedin 2	protein_coding	-1.25	2.65	1.43713e-05	0.000743316	-0.37	0.000478284
SPHK2	ENSG00000063176.16	sphingosine kinase 2	protein_coding	-1.24	4.13	2.13833e-14	1.37654e-12	-0.74	5.51284e-18
EGR1	ENSG00000120738.8	early growth response 1	protein_coding	-1.21	9.25	6.44822e-05	1.63065e-05	-0.46	4.83033e-06
ALAD	ENSG00000148218.16	aminolevulinate dehydratase	protein_coding	-1.2	6.61	1.23713e-14	6.75265e-11	-0.68	2.39561e-14
SLC19A2	ENSG00000117479.15	solute carrier family 19 member 2	protein_coding	-1.19	4.65	3.12267e-07	8.09121e-12	-0.71	3.20591e-16
TRIB1	ENSG00000173334.4	tribbles pseudokinase 1	protein_coding	-1.17	6.24	3.16439e-11	4.95663e-10	-0.65	9.45284e-13
PANK1	ENSG00000152782.16	pantothenate kinase 1	protein_coding	-1.16	5.43	4.90811e-08	3.23218e-09	-0.62	2.32567e-11
APEH	ENSG00000164062.13	acylaminoacyl-peptide hydrolase	protein_coding	-1.14	6.89	4.9274e-19	3.63227e-13	-0.76	1.7752e-19
MSI2	ENSG00000153944.12	musashi RNA binding protein 2	protein_coding	-1.04	7.11	6.95881e-14	3.49073e-13	-0.76	1.59208e-19
KLF15	ENSG00000163884.4	Kruppel like factor 15	protein_coding	-1.03	4.62	0.000297454	1.63065e-05	-0.46	4.83033e-06
HSPA1B	ENSG00000204388.7	heat shock protein family A (Hsp70) member 1B	protein_coding	-0.99	5.84	7.46647e-09	7.96582e-10	-0.64	2.17514e-12
QPRT	ENSG00000103485.19	quinolinate phosphoribosyltransferase	protein_coding	-0.98	7.05	4.72038e-05	1.17581e-06	-0.51	1.54349e-07
DYNLL2	ENSG00000264364.3	dynein light chain LC8-type 2	protein_coding	-0.91	7.6	1.03381e-19	3.80216e-14	-0.8	1.79432e-22
SLC18B1	ENSG00000146409.12	solute carrier family 18 member B1	protein_coding	-0.9	4.63	8.0583e-14	4.36804e-12	-0.72	8.1916e-17
PTGIS	ENSG00000124212.6	prostaglandin I2 synthase	protein_coding	-0.89	4.3	0.0010477	2.6706e-05	-0.45	8.96966e-06
PFKM	ENSG00000152556.17	phosphofructokinase, muscle	protein_coding	-0.86	6.72	7.41725e-10	1.63562e-11	-0.7	1.42475e-15
KLHL15	ENSG00000174010.9	kelch like family member 15	protein_coding	-0.83	4.28	6.50037e-13	3.42079e-12	-0.73	4.68622e-17
MACROH2A2	ENSG00000099284.15	macroH2A,2 histone	protein_coding	-0.83	4.26	4.52616e-07	3.90612e-09	-0.62	3.17763e-11
NDUFC2	ENSG00000151366.13	NADH:ubiquinone oxidoreductase subunit C2	protein_coding	-0.78	4.23	1.86373e-17	6.87965e-13	-0.75	9.71966e-19
VPS13D	ENSG00000048707.15	vacuolar protein sorting 13 homolog D	protein_coding	-0.77	6.78	4.21686e-09	3.19396e-10	-0.66	4.30851e-13
LRATD2	ENSG00000168672.4	LRAT domain containing 2	protein_coding	-0.77	6.74	4.39899e-10	1.50379e-11	-0.7	1.19773e-15
MED21	ENSG00000152944.9	mediator complex subunit 21	protein_coding	-0.76	5.23	2.29264e-15	2.74764e-13	-0.77	8.21787e-20
TBC1D16	ENSG00000167291.16	TBC1 domain family member 16	protein_coding	-0.75	7.37	6.21447e-05	0.0158655	-0.27	0.0141956
WDR6	ENSG00000178252.18	WD repeat domain 6	protein_coding	-0.74	6.73	1.3128e-10	1.38514e-11	-0.71	1.00791e-15
BACH2	ENSG00000112182.15	BTB domain and CNC homolog 2	protein_coding	-0.73	1.81	0.000961404	2.79157e-06	-0.5	4.92594e-07
VANGL2	ENSG00000162738.6	VANGL planar cell polarity protein 2	protein_coding	-0.72	3.85	0.00448037	3.55013e-05	-0.44	1.27728e-05
MAPK8IP2	ENSG00000008735.14	mitogen-activated protein kinase 8 interacting protein 2	protein_coding	-0.71	0.56	0.00331627	3.07931e-05	-0.44	1.07095e-05
ATP9A	ENSG00000054793.14	ATPase phospholipid transporting 9A (putative)	protein_coding	-0.67	6.63	2.06144e-05	1.13554e-07	-0.56	5.76671e-09
EMX2	ENSG00000170370.12	empty spiracles homeobox 2	protein_coding	-0.66	5.95	0.000894451	2.20757e-07	-0.55	1.50186e-08
GNAZ	ENSG00000128266.9	G protein subunit alpha z	protein_coding	-0.66	2.8	0.000413087	0.000106809	-0.42	4.89549e-05
RGS5	ENSG00000232995.7	regulator of G protein signaling 5 [Source:NCBI gene (formerly Entrezgene)	lncRNA	-0.65	-0.52	2.92437e-06	6.30193e-07	-0.53	6.56076e-08
PRKAR2A	ENSG00000114302.16	protein kinase cAMP-dependent type II regulatory subunit alpha	protein_coding	-0.64	6.12	1.23563e-13	7.15805e-12	-0.72	2.45214e-16
CEP70	ENSG00000114107.9	centrosomal protein 70	protein_coding	-0.64	4.58	1.2481e-06	1.89371e-08	-0.59	3.9044e-10
FUT10	ENSG00000172728.16	fucosyltransferase 10	protein_coding	-0.64	3.17	6.78405e-12	1.12381e-11	-0.71	6.5004e-16
TEF	ENSG00000167074.15	TEF transcription factor, PAR bZIP family member	protein_coding	-0.63	6.09	0.000414397	0.000101154	-0.42	4.58598e-05
EPHX3	ENSG00000105131.8	epoxide hydrolase 3	protein_coding	-0.63	1.77	0.0306861	0.000341521	-0.39	0.000194282
PSD3	ENSG00000156011.17	pleckstrin and Sec7 domain containing 3	protein_coding	-0.63	3.88	0.00978488	6.51853e-07	-0.52	6.8732e-08
CHUK	ENSG00000213341.11	component of inhibitor of nuclear factor kappa B kinase complex	protein_coding	-0.6	5.21	3.59807e-12	8.43639e-12	-0.71	3.50723e-16
BTG3	ENSG00000154640.15	BTG anti-proliferation factor 3	protein_coding	-0.59	4.52	1.17229e-05	4.89257e-06	-0.48	1.03016e-06
PRKAB1	ENSG00000111725.11	protein kinase AMP-activated non-catalytic subunit beta 1	protein_coding	-0.57	6.78	9.0203e-06	1.91972e-07	-0.55	1.23063e-08
FAM20B	ENSG00000116199.12	FAM20B glycosaminoglycan xylosylkinase	protein_coding	-0.57	6.31	2.00097e-14	1.22447e-11	-0.71	7.7686e-16
UQCC2	ENSG00000137288.10	ubiquinol-cytochrome c reductase complex assembly factor 2	protein_coding	-0.57	4.16	1.15605e-05	4.98981e-07	-0.53	4.74388e-08
CCDC171	ENSG00000164989.17	coiled-coil domain containing 171	protein_coding	-0.56	2.06	1.5252e-07	2.20757e-07	-0.55	1.50186e-08
MIB1	ENSG00000101752.12	mindbomb E3 ubiquitin protein ligase 1	protein_coding	-0.56	6.24	2.56035e-07	1.96653e-08	-0.59	4.1368e-10
LRRC8B	ENSG00000197147.15	leucine rich repeat containing 8 VRAC subunit B	protein_coding	-0.56	4.04	3.78599e-07	4.36588e-08	-0.57	1.39759e-09
PHF7	ENSG00000010318.21	PHD finger protein 7	protein_coding	-0.55	1.93	3.59262e-07	7.656e-10	-0.64	2.03041e-12
KLHL25	ENSG00000183655.13	kelch like family member 25	protein_coding	-0.55	2.75	0.000103373	1.13785e-06	-0.51	1.47646e-07
PRXL2A	ENSG00000122378.14	peroxiredoxin like 2A	protein_coding	-0.55	7.35	6.76059e-07	8.49371e-07	-0.52	9.89389e-08
ETNK1	ENSG00000139163.16	ethanolamine kinase 1	protein_coding	-0.54	6.36	1.20047e-08	5.26135e-11	-0.69	1.47943e-14
ADSS2	ENSG00000035687.10	adenylosuccinate synthase 2	protein_coding	-0.54	5.52	7.39866e-07	1.88044e-09	-0.63	9.45374e-12
HSPA1A	ENSG00000204389.10	heat shock protein family A (Hsp70) member 1A	protein_coding	-0.53	5.77	7.13635e-05	1.0166e-05	-0.47	2.64871e-06
GLIPR1L2	ENSG00000180481.11	GLIPR1 like 2	protein_coding	-0.5	1.32	0.0228762	0.0059176	-0.31	0.00488455
MLLT6	ENSG00000275023.5	MLLT6, PHD finger containing	protein_coding	-0.49	7.04	2.93091e-07	9.52749e-08	-0.56	4.46085e-09
SS18	ENSG00000141380.14	SS18 subunit of BAF chromatin remodeling complex	protein_coding	-0.49	6.48	7.76118e-10	5.58151e-10	-0.65	1.16649e-12
LYRM2	ENSG00000083099.11	LYR motif containing 2	protein_coding	-0.49	5.32	5.40397e-10	1.81329e-10	-0.67	1.53503e-13
C22orf46	ENSG00000184208.12	chromosome 22 putative open reading frame 46	transcribed_unitary_pseudogene	-0.49	4.1	1.13049e-06	6.51853e-07	-0.52	6.8732e-08
SPTLC2	ENSG00000100596.7	serine palmitoyltransferase long chain base subunit 2	protein_coding	-0.48	7.22	1.74895e-06	5.04692e-06	-0.48	1.07288e-06
STEAP2	ENSG00000157214.14	STEAP2 metalloreductase	protein_coding	-0.48	4.73	0.0119928	8.75344e-06	-0.47	2.18584e-06
KCNK12	ENSG00000184261.5	potassium two pore domain channel subfamily K member 12	protein_coding	-0.47	-0.73	0.0129773	0.000725893	-0.37	0.00046544
GSKIP	ENSG00000100744.15	GSK3B interacting protein	protein_coding	-0.45	4.56	2.14698e-05	4.21906e-07	-0.53	3.75235e-08
NFE2L2	ENSG00000116044.16	nuclear factor, erythroid 2 like 2	protein_coding	-0.44	7.39	1.47315e-07	6.30193e-07	-0.53	6.56076e-08
HNRNPH2	ENSG00000126945.9	heterogeneous nuclear ribonucleoprotein H2	protein_coding	-0.42	6.66	9.97999e-09	2.83357e-10	-0.66	3.46758e-13
PCNX4	ENSG00000126773.13	pecanex 4	protein_coding	-0.42	6.1	1.90097e-06	6.918e-09	-0.61	8.00305e-11
RCL1	ENSG00000120158.12	RNA terminal phosphate cyclase like 1	protein_coding	-0.42	4.06	2.13744e-06	4.9084e-09	-0.61	4.61021e-11
AGPAT3	ENSG00000160216.21	1-acylglycerol-3-phosphate O-acyltransferase 3	protein_coding	-0.39	7.47	0.00567072	0.0430347	-0.23	0.0408414
STT3B	ENSG00000163527.10	STT3 oligosaccharyltransferase complex catalytic subunit B	protein_coding	-0.39	7.23	2.75634e-06	2.63535e-08	-0.58	6.48935e-10
DFFA	ENSG00000160049.12	DNA fragmentation factor subunit alpha	protein_coding	-0.39	5.51	5.86046e-07	1.62499e-06	-0.51	2.39068e-07
GLO1	ENSG00000124767.7	glyoxalase I	protein_coding	-0.38	6.96	1.61882e-05	1.21797e-07	-0.56	6.38627e-09
THRA	ENSG00000126351.13	thyroid hormone receptor alpha	protein_coding	-0.38	6.34	0.00127704	0.000644107	-0.37	0.000405642
KIAA0100	ENSG00000007202.15	KIAA0100	protein_coding	-0.37	7.24	0.00025148	2.91063e-05	-0.45	9.98284e-06
GTF2H5	ENSG00000272047.3	general transcription factor IIH subunit 5	protein_coding	-0.37	4.91	5.2665e-06	9.37487e-07	-0.52	1.13269e-07
TRIM33	ENSG00000197323.12	tripartite motif containing 33	protein_coding	-0.35	5.86	2.22911e-05	3.21529e-07	-0.54	2.56182e-08
MDN1	ENSG00000112159.12	midasin AAA ATPase 1	protein_coding	-0.35	5.8	0.00187385	0.00362517	-0.32	0.00284929
ARF6	ENSG00000165527.7	ADP ribosylation factor 6	protein_coding	-0.34	7.05	0.00014802	4.32728e-05	-0.44	1.63053e-05
CBX6	ENSG00000183741.12	chromobox 6	protein_coding	-0.34	6.78	0.00599493	0.000448157	-0.38	0.000266668
SLC25A17	ENSG00000100372.15	solute carrier family 25 member 17	protein_coding	-0.34	4.67	9.14461e-09	6.65991e-09	-0.61	7.53235e-11
PTCD3	ENSG00000132300.19	pentatricopeptide repeat domain 3	protein_coding	-0.33	5.8	4.43749e-07	3.46075e-10	-0.66	4.97805e-13
WDR1	ENSG00000071127.17	WD repeat domain 1	protein_coding	-0.32	8.47	0.000182267	0.000286247	-0.39	0.000158005
KLHL9	ENSG00000198642.7	kelch like family member 9	protein_coding	-0.31	6.07	0.000547457	0.000239913	-0.4	0.000128331
TAFA2	ENSG00000198673.10	TAFA chemokine like family member 2	protein_coding	-0.31	0.57	0.033251	0.00247429	-0.33	0.00186398
POLR2A	ENSG00000181222.19	RNA polymerase II subunit A	protein_coding	-0.3	8.09	0.00224895	0.0015906	-0.35	0.00113594
KIF5B	ENSG00000170759.11	kinesin family member 5B	protein_coding	-0.3	7.51	0.000216437	2.99332e-05	-0.45	1.03388e-05
AK2	ENSG00000004455.17	adenylate kinase 2	protein_coding	-0.3	7.33	2.8831e-05	4.08716e-05	-0.44	1.52015e-05
TP53BP1	ENSG00000067369.14	tumor protein p53 binding protein 1	protein_coding	-0.28	5.64	0.00480024	0.00410455	-0.32	0.00326836
RAB5B	ENSG00000111540.16	RAB5B, member RAS oncogene family	protein_coding	-0.26	7.78	8.80036e-10	2.30964e-10	-0.66	2.39586e-13
TMX4	ENSG00000125827.9	thioredoxin related transmembrane protein 4	protein_coding	-0.26	7.29	0.00430781	0.000836121	-0.36	0.000547298
TECPR2	ENSG00000196663.16	tectonin beta-propeller repeat containing 2	protein_coding	-0.26	5.11	0.00618245	0.00203115	-0.34	0.00149509
SKA2	ENSG00000182628.13	spindle and kinetochore associated complex subunit 2	protein_coding	-0.26	4.9	0.00433286	0.000406221	-0.38	0.000237874
ATP6V0E1	ENSG00000113732.9	ATPase H+ transporting V0 subunit e1	protein_coding	-0.25	7.71	0.0083296	0.0035495	-0.32	0.00278362
SMAD2	ENSG00000175387.16	SMAD family member 2	protein_coding	-0.25	6.49	0.000205047	6.92832e-05	-0.43	2.90024e-05
GTF2A1	ENSG00000165417.12	general transcription factor IIA subunit 1	protein_coding	-0.25	5.92	0.0100219	0.00105552	-0.36	0.000713996
ATP2B1	ENSG00000070961.16	ATPase plasma membrane Ca2+ transporting 1	protein_coding	-0.24	5.84	0.0143371	0.00312955	-0.33	0.00241856
GATAD2B	ENSG00000143614.10	GATA zinc finger domain containing 2B	protein_coding	-0.24	5.4	0.00390483	0.00177784	-0.34	0.00128757
NCDN	ENSG00000020129.16	neurochondrin	protein_coding	-0.24	5.01	0.0303425	0.0167384	-0.27	0.015035
ARHGAP12	ENSG00000165322.18	Rho GTPase activating protein 12	protein_coding	-0.23	5.63	0.00971701	2.82793e-05	-0.45	9.63257e-06
TENT4B	ENSG00000121274.14	terminal nucleotidyltransferase 4B	protein_coding	-0.23	4.68	0.0139656	0.000599783	-0.37	0.00037366
EMC10	ENSG00000161671.17	ER membrane protein complex subunit 10	protein_coding	-0.2	6.83	0.0461409	0.034521	-0.24	0.0324007
USP33	ENSG00000077254.14	ubiquitin specific peptidase 33	protein_coding	-0.2	6.26	0.00724584	0.000494513	-0.38	0.000298851
MRS2	ENSG00000124532.15	magnesium transporter MRS2	protein_coding	-0.2	5.06	0.0298259	0.0142367	-0.28	0.0126418
SFPQ	ENSG00000116560.11	splicing factor proline and glutamine rich	protein_coding	-0.19	7.53	0.00225133	0.00281574	-0.33	0.00215277
ENSA	ENSG00000143420.19	endosulfine alpha	protein_coding	-0.19	7.16	0.000289317	4.83833e-05	-0.43	1.87023e-05
PAFAH1B2	ENSG00000168092.14	platelet activating factor acetylhydrolase 1b catalytic subunit 2	protein_coding	-0.19	6.89	0.00802505	0.00666012	-0.3	0.00555672
BRD7	ENSG00000166164.16	bromodomain containing 7	protein_coding	-0.19	5.84	0.000466137	2.99332e-05	-0.45	1.03388e-05
WDR37	ENSG00000047056.16	WD repeat domain 37	protein_coding	-0.19	4.76	0.0237869	0.0244798	-0.26	0.0225389
IRGQ	ENSG00000167378.8	immunity related GTPase Q	protein_coding	-0.18	4.74	0.0258952	0.00212231	-0.34	0.00157054
TRIM44	ENSG00000166326.7	tripartite motif containing 44	protein_coding	-0.17	7.32	0.0229007	0.00981587	-0.29	0.00847014
ZNF652	ENSG00000198740.9	zinc finger protein 652	protein_coding	-0.17	5.17	0.0309836	0.0034767	-0.32	0.00272043
PHF23	ENSG00000040633.13	PHD finger protein 23	protein_coding	-0.16	5.23	0.0353334	0.0105719	-0.29	0.00917629
CELF1	ENSG00000149187.18	CUGBP Elav-like family member 1	protein_coding	-0.14	6.77	0.0172262	0.00242239	-0.33	0.00182043
COPB2	ENSG00000184432.11	COPI coat complex subunit beta 2	protein_coding	0.15	7.46	0.0368117	0.0458051	0.23	0.0436092
CPSF7	ENSG00000149532.16	cleavage and polyadenylation specific factor 7	protein_coding	0.15	6.22	0.00494531	0.0217325	0.26	0.0198615
SNX17	ENSG00000115234.11	sorting nexin 17	protein_coding	0.19	7.02	0.00372069	0.000459211	0.38	0.000274345
ZSCAN29	ENSG00000140265.12	zinc finger and SCAN domain containing 29	protein_coding	0.19	4.19	0.0120379	0.00275677	0.33	0.00210248
HNRNPH1	ENSG00000169045.17	heterogeneous nuclear ribonucleoprotein H1	protein_coding	0.2	7.58	0.0103721	0.0334377	0.24	0.0313289
RAB8A	ENSG00000167461.12	RAB8A, member RAS oncogene family	protein_coding	0.2	4.21	0.00239978	8.38665e-05	0.42	3.65629e-05
GNL3	ENSG00000163938.17	G protein nucleolar 3	protein_coding	0.21	4.91	0.0212998	0.0262046	0.25	0.0242183
GTDC1	ENSG00000121964.14	glycosyltransferase like domain containing 1	protein_coding	0.22	4.43	0.0136615	0.0145031	0.28	0.0128946
KPNB1	ENSG00000108424.11	karyopherin subunit beta 1	protein_coding	0.23	7.52	3.61587e-05	9.33276e-05	0.42	4.1612e-05
MRE11	ENSG00000020922.13	MRE11 homolog, double strand break repair nuclease	protein_coding	0.23	4.54	0.00346092	0.000437537	0.38	0.000259336
KMT2B	ENSG00000272333.7	lysine methyltransferase 2B	protein_coding	0.24	5.31	0.0232096	0.00312955	0.33	0.00241856
ENDOD1	ENSG00000149218.5	endonuclease domain containing 1	protein_coding	0.25	6.7	0.0102429	0.00603296	0.3	0.00498782
SRSF4	ENSG00000116350.17	serine and arginine rich splicing factor 4	protein_coding	0.25	6.23	7.20855e-05	6.55695e-05	0.43	2.71211e-05
AGO2	ENSG00000123908.12	argonaute RISC catalytic component 2	protein_coding	0.25	5.39	0.0191393	0.0472511	0.23	0.0450523
TRIM35	ENSG00000104228.13	tripartite motif containing 35	protein_coding	0.25	4.7	0.00967973	0.0120626	0.28	0.0105789
HNRNPUL1	ENSG00000105323.17	heterogeneous nuclear ribonucleoprotein U like 1	protein_coding	0.26	7.48	5.79683e-05	4.83833e-05	0.43	1.87023e-05
PPP6R1	ENSG00000105063.19	protein phosphatase 6 regulatory subunit 1	protein_coding	0.27	6.16	0.00486255	0.000150387	0.41	7.37791e-05
ZNF550	ENSG00000251369.9	zinc finger protein 550	protein_coding	0.27	2.95	0.0180959	0.01991	0.26	0.0180944
LARP1	ENSG00000155506.18	La ribonucleoprotein 1, translational regulator	protein_coding	0.28	7.92	0.000870481	0.00281574	0.33	0.00215277
FAM193A	ENSG00000125386.16	family with sequence similarity 193 member A	protein_coding	0.29	4.88	0.000340893	4.44877e-05	0.44	1.68716e-05
ZNF514	ENSG00000144026.12	zinc finger protein 514	protein_coding	0.3	3.65	0.000782954	0.00212231	0.34	0.00157054
ZNF200	ENSG00000010539.12	zinc finger protein 200	protein_coding	0.3	3.04	2.32039e-05	9.01565e-06	0.47	2.27106e-06
UBE2Z	ENSG00000159202.18	ubiquitin conjugating enzyme E2 Z	protein_coding	0.31	7.08	1.44839e-07	1.66928e-07	0.55	1.0072e-08
NR1H2	ENSG00000131408.15	nuclear receptor subfamily 1 group H member 2	protein_coding	0.32	6.43	0.0013458	1.73359e-06	0.51	2.60759e-07
SLC35B1	ENSG00000121073.15	solute carrier family 35 member B1	protein_coding	0.33	5.54	1.04938e-05	0.000437537	0.38	0.000259336
CYTH1	ENSG00000108669.16	cytohesin 1	protein_coding	0.33	5.34	8.69627e-06	3.55013e-05	0.44	1.27728e-05
SETD1A	ENSG00000099381.18	SET domain containing 1A, histone lysine methyltransferase	protein_coding	0.33	5.09	0.000305878	2.99332e-05	0.45	1.03388e-05
ULK1	ENSG00000177169.10	unc-51 like autophagy activating kinase 1	protein_coding	0.34	5.69	0.00357111	0.0105719	0.29	0.00917629
ERCC1	ENSG00000012061.16	ERCC excision repair 1, endonuclease non-catalytic subunit	protein_coding	0.35	5.2	7.62277e-06	1.42885e-06	0.51	2.00995e-07
BRD9	ENSG00000028310.18	bromodomain containing 9	protein_coding	0.35	4.66	5.51672e-07	3.91725e-08	0.58	1.18706e-09
ACTR3	ENSG00000115091.12	actin related protein 3	protein_coding	0.36	7.71	4.66536e-05	5.20185e-06	0.48	1.11618e-06
EDEM1	ENSG00000134109.11	ER degradation enhancing alpha-mannosidase like protein 1	protein_coding	0.36	6	1.95583e-06	5.04692e-06	0.48	1.07288e-06
CRTC3	ENSG00000140577.16	CREB regulated transcription coactivator 3	protein_coding	0.37	5.84	1.01143e-06	4.74087e-06	0.48	9.89042e-07
PSMB2	ENSG00000126067.12	proteasome 20S subunit beta 2	protein_coding	0.38	6.34	7.10785e-07	4.98981e-07	0.53	4.74388e-08
ZNF462	ENSG00000148143.13	zinc finger protein 462	protein_coding	0.39	4.94	0.00147613	0.00735077	0.3	0.00618855
TPRKB	ENSG00000144034.16	TP53RK binding protein	protein_coding	0.39	4.02	3.86812e-05	0.000150387	0.41	7.37791e-05
AP2A1	ENSG00000196961.13	adaptor related protein complex 2 subunit alpha 1	protein_coding	0.4	6.36	1.04296e-05	5.21544e-08	0.57	1.82635e-09
CNNM3	ENSG00000168763.16	cyclin and CBS domain divalent metal cation transport mediator 3	protein_coding	0.41	5.51	2.09326e-06	1.21554e-05	0.47	3.32733e-06
FADS1	ENSG00000149485.19	fatty acid desaturase 1	protein_coding	0.41	5.05	0.00100442	0.00720797	0.3	0.00605846
PBX2	ENSG00000204304.12	PBX homeobox 2	protein_coding	0.42	5.73	2.01696e-09	3.91725e-08	0.58	1.18706e-09
STK35	ENSG00000125834.13	serine/threonine kinase 35	protein_coding	0.42	5.07	2.51181e-08	4.36588e-08	0.57	1.39759e-09
KAT2A	ENSG00000108773.11	lysine acetyltransferase 2A	protein_coding	0.42	4.48	0.000178247	0.000300962	0.39	0.000167597
FBRS	ENSG00000156860.16	fibrosin	protein_coding	0.45	6.14	6.20048e-08	1.30733e-10	0.67	8.36774e-14
TBC1D10B	ENSG00000169221.14	TBC1 domain family member 10B	protein_coding	0.45	5.64	9.01765e-09	4.06717e-10	0.65	6.64088e-13
PHF19	ENSG00000119403.15	PHD finger protein 19	protein_coding	0.48	3.93	3.10056e-05	2.99332e-05	0.45	1.03388e-05
ZNF384	ENSG00000126746.17	zinc finger protein 384	protein_coding	0.49	4.49	2.24319e-09	3.04573e-08	0.58	8.09739e-10
FBXL19	ENSG00000099364.18	F-box and leucine rich repeat protein 19	protein_coding	0.49	3.78	4.50795e-05	5.88534e-06	0.48	1.31028e-06
EEF2	ENSG00000167658.16	eukaryotic translation elongation factor 2	protein_coding	0.5	11.19	3.54426e-06	1.72863e-07	0.55	1.05904e-08
TMEM98	ENSG00000006042.12	transmembrane protein 98	protein_coding	0.5	5.7	0.00588017	0.0195625	0.26	0.0177601
NIN	ENSG00000100503.26	ninein	protein_coding	0.51	5.76	1.78696e-05	0.000166984	0.4	8.35819e-05
TBL1XR1	ENSG00000177565.18	TBL1X receptor 1	protein_coding	0.52	7.35	1.0033e-07	1.61212e-07	0.55	9.57932e-09
ACADL	ENSG00000115361.8	acyl-CoA dehydrogenase long chain	protein_coding	0.52	5.22	0.0458479	0.00419317	0.32	0.0033462
MCTP1	ENSG00000175471.19	multiple C2 and transmembrane domain containing 1	protein_coding	0.52	3.54	0.0168224	0.0202536	0.26	0.0184272
LRIG1	ENSG00000144749.14	leucine rich repeats and immunoglobulin like domains 1	protein_coding	0.53	4.81	1.41276e-06	8.61406e-05	0.42	3.77653e-05
RAPGEF1	ENSG00000107263.18	Rap guanine nucleotide exchange factor 1	protein_coding	0.54	7.01	1.11844e-08	2.04052e-08	0.59	4.37847e-10
SNX8	ENSG00000106266.11	sorting nexin 8	protein_coding	0.54	5	1.00771e-05	5.36453e-06	0.48	1.16183e-06
DLL1	ENSG00000198719.9	delta like canonical Notch ligand 1	protein_coding	0.54	3.7	0.00102238	0.0224955	0.26	0.0206031
COQ8A	ENSG00000163050.18	coenzyme Q8A	protein_coding	0.57	-2.02	0.00517916	0.00843137	0.29	0.00718277
RPL31	ENSG00000071082.11	ribosomal protein L31	protein_coding	0.58	9.02	1.25589e-07	5.33616e-07	0.53	5.20806e-08
MYADM	ENSG00000179820.16	myeloid associated differentiation marker	protein_coding	0.58	6.58	0.000891216	0.000308674	0.39	0.000172637
LENG9	ENSG00000275183.2	leukocyte receptor cluster member 9	protein_coding	0.59	1.35	0.000998254	0.00514934	0.31	0.00419366
UBE2D2	ENSG00000131508.16	ubiquitin conjugating enzyme E2 D2	protein_coding	0.59	6.55	1.48939e-12	6.58436e-12	0.72	2.04481e-16
BRAT1	ENSG00000106009.16	BRCA1 associated ATM activator 1	protein_coding	0.59	5.26	3.36667e-07	2.37726e-09	0.62	1.39746e-11
SKP2	ENSG00000145604.17	S-phase kinase associated protein 2	protein_coding	0.59	3.27	4.26933e-08	8.27785e-10	0.64	2.32698e-12
OCIAD2	ENSG00000145247.12	OCIA domain containing 2	protein_coding	0.6	6.75	0.000486994	0.000246068	0.4	0.000132244
DSN1	ENSG00000149636.16	DSN1 component of MIS12 kinetochore complex	protein_coding	0.6	3.52	1.22436e-11	1.06378e-10	0.67	5.68788e-14
FAAP24	ENSG00000131944.10	FA core complex associated protein 24	protein_coding	0.6	1.15	3.77229e-06	2.31061e-05	0.45	7.48707e-06
RPL37A	ENSG00000197756.10	ribosomal protein L37a	protein_coding	0.64	8.96	2.22362e-08	3.91725e-08	0.58	1.18706e-09
AKAP13	ENSG00000170776.22	A-kinase anchoring protein 13	protein_coding	0.64	7	6.0079e-10	1.57263e-08	0.59	2.92858e-10
SEMA4B	ENSG00000185033.14	semaphorin 4B	protein_coding	0.64	6.5	0.000421207	0.000324917	0.39	0.000183288
NEMP1	ENSG00000166881.10	nuclear envelope integral membrane protein 1	protein_coding	0.64	4.43	5.57128e-09	2.11304e-08	0.59	4.62596e-10
FZD5	ENSG00000163251.4	frizzled class receptor 5	protein_coding	0.69	5.16	1.06327e-05	8.23667e-06	0.47	2.02209e-06
STOML1	ENSG00000067221.14	stomatin like 1	protein_coding	0.72	4.12	6.23424e-10	1.16729e-08	0.6	1.83818e-10
RHOB	ENSG00000143878.10	ras homolog family member B	protein_coding	0.75	9.29	4.28978e-05	0.00166435	0.34	0.00119543
SLC39A1	ENSG00000143570.19	solute carrier family 39 member 1	protein_coding	0.76	-0.75	3.08885e-05	0.000246068	0.4	0.000132244
FNDC3B	ENSG00000075420.13	fibronectin type III domain containing 3B	protein_coding	0.76	7.35	5.75684e-12	1.36073e-10	0.67	9.02425e-14
GVQW3	ENSG00000179240.13	GVQW motif containing 3	protein_coding	0.76	2.52	3.01941e-07	4.2047e-05	0.44	1.5741e-05
C19orf48	ENSG00000167747.15	chromosome 19 open reading frame 48	transcribed_unitary_pseudogene	0.77	4.58	3.53634e-08	4.861e-08	0.57	1.64259e-09
VAT1	ENSG00000108828.16	vesicle amine transport 1	protein_coding	0.78	8.2	6.70661e-13	3.19396e-10	0.66	4.30851e-13
FOXL1	ENSG00000176678.6	forkhead box L1	protein_coding	0.79	1.95	0.000617541	0.000614104	0.37	0.000383965
ABL2	ENSG00000143322.21	ABL proto-oncogene 2, non-receptor tyrosine kinase	protein_coding	0.8	5.52	6.57999e-14	1.27707e-11	0.71	8.48292e-16
ATP2B4	ENSG00000058668.15	ATPase plasma membrane Ca2+ transporting 4	protein_coding	0.81	7.36	3.37606e-12	7.97131e-11	0.68	3.29059e-14
RASSF3	ENSG00000153179.13	Ras association domain family member 3	protein_coding	0.82	4.99	1.06078e-11	8.66623e-11	0.68	3.8551e-14
DPY19L1	ENSG00000173852.15	dpy-19 like C-mannosyltransferase 1	protein_coding	0.83	5.27	5.27101e-14	3.87577e-12	0.73	6.21902e-17
NME1	ENSG00000239672.8	NME/NM23 nucleoside diphosphate kinase 1	protein_coding	0.84	3.04	1.70469e-08	0.00014648	0.41	7.15049e-05
ZDHHC22	ENSG00000177108.5	zinc finger DHHC-type palmitoyltransferase 22	protein_coding	0.85	-4.13	0.0355367	0.00459061	0.31	0.00369561
TP53INP1	ENSG00000164938.14	tumor protein p53 inducible nuclear protein 1	protein_coding	0.85	5.74	1.75952e-11	2.94945e-10	0.66	3.7282e-13
IER5	ENSG00000162783.11	immediate early response 5	protein_coding	0.87	4.39	4.0974e-12	1.25416e-10	0.67	7.74619e-14
MAZ	ENSG00000103495.14	MYC associated zinc finger protein	protein_coding	0.89	2.94	5.73684e-13	2.37929e-11	0.7	3.07025e-15
PFDN5	ENSG00000123349.15	prefoldin subunit 5	protein_coding	0.9	-0.27	2.06717e-05	0.000135549	0.41	6.51545e-05
CALU	ENSG00000128595.17	calumenin	protein_coding	0.92	7.49	5.2446e-11	1.81329e-10	0.67	1.53503e-13
STK4	ENSG00000101109.12	serine/threonine kinase 4	protein_coding	0.93	5.62	2.52271e-19	4.43176e-14	0.8	3.01616e-22
PGM2L1	ENSG00000165434.8	phosphoglucomutase 2 like 1	protein_coding	0.95	4.54	5.30509e-07	3.23218e-09	0.62	2.32567e-11
ANKRD13B	ENSG00000198720.13	ankyrin repeat domain 13B	protein_coding	0.95	1.69	1.19609e-07	3.68684e-07	0.54	3.10516e-08
TNK2	ENSG00000061938.20	tyrosine kinase non receptor 2	protein_coding	0.96	4.51	6.91841e-12	2.35255e-12	0.73	1.97867e-17
ZC3HC1	ENSG00000091732.17	zinc finger C3HC-type containing 1	protein_coding	0.98	4.63	5.08855e-19	1.56613e-13	0.78	1.66493e-20
PLXNA3	ENSG00000130827.6	plexin A3	protein_coding	1.03	4.79	7.2983e-11	1.4187e-10	0.67	9.74713e-14
FAM110A	ENSG00000125898.13	family with sequence similarity 110 member A	protein_coding	1.04	3.13	1.42347e-14	1.93523e-11	0.7	2.01142e-15
TPI1	ENSG00000111669.15	triosephosphate isomerase 1	protein_coding	1.08	9.69	7.71197e-19	5.04037e-13	0.76	4.23161e-19
CELF2	ENSG00000048740.18	CUGBP Elav-like family member 2	protein_coding	1.09	4.94	1.54503e-10	8.65078e-09	0.6	1.14498e-10
CORO1C	ENSG00000110880.11	coronin 1C	protein_coding	1.12	7.11	1.0348e-18	3.49073e-13	0.76	1.59208e-19
PXDC1	ENSG00000168994.14	PX domain containing 1	protein_coding	1.12	5.46	1.80089e-14	1.38514e-11	0.71	1.00791e-15
GFOD1	ENSG00000145990.11	glucose-fructose oxidoreductase domain containing 1	protein_coding	1.13	3.95	1.37982e-09	8.49371e-07	0.52	9.89389e-08
RFTN1	ENSG00000131378.14	raftlin, lipid raft linker 1	protein_coding	1.15	5.61	1.19953e-16	4.74798e-12	0.72	9.86772e-17
OLR1	ENSG00000173391.9	oxidized low density lipoprotein receptor 1	protein_coding	1.16	4.4	0.00176263	0.00135812	0.35	0.000950349
SPNS1	ENSG00000169682.18	sphingolipid transporter 1 (putative)	protein_coding	1.19	-1.61	1.34406e-06	2.2386e-06	0.5	3.67193e-07
CDK5R1	ENSG00000176749.9	cyclin dependent kinase 5 regulatory subunit 1	protein_coding	1.25	1.68	1.30495e-10	1.43689e-09	0.63	5.98704e-12
SACS	ENSG00000151835.16	sacsin molecular chaperone	protein_coding	1.27	4.48	6.20162e-14	2.6735e-12	0.73	2.65172e-17
RBM20	ENSG00000203867.8	RNA binding motif protein 20	protein_coding	1.27	2.4	5.55855e-06	0.0034767	0.32	0.00272043
NODAL	ENSG00000156574.10	nodal growth differentiation factor	protein_coding	1.33	-2.26	1.06841e-08	7.85757e-08	0.56	3.35704e-09
HEYL	ENSG00000163909.8	hes related family bHLH transcription factor with YRPW motif like	protein_coding	1.36	5.78	3.53099e-11	4.21611e-09	0.61	3.59966e-11
GRID1	ENSG00000182771.19	glutamate ionotropic receptor delta type subunit 1	protein_coding	1.42	1.09	3.83066e-10	6.74543e-07	0.52	7.20314e-08
BMP8B	ENSG00000116985.12	bone morphogenetic protein 8b	protein_coding	1.49	2.56	3.13094e-09	6.74075e-05	0.43	2.80481e-05
RUNX1	ENSG00000159216.19	RUNX family transcription factor 1	protein_coding	1.55	5.54	1.2175e-08	7.32753e-11	0.68	2.8051e-14
BCL11B	ENSG00000127152.18	BAF chromatin remodeling complex subunit BCL11B	protein_coding	1.6	2.49	4.36619e-11	8.65078e-09	0.6	1.14498e-10
ENTHD1	ENSG00000176177.10	ENTH domain containing 1	protein_coding	1.65	-3.62	9.29539e-05	3.69332e-05	0.44	1.34095e-05
SAMHD1	ENSG00000101347.10	SAM and HD domain containing deoxynucleoside triphosphate triphosphohydrolase 1	protein_coding	1.66	6.6	2.4854e-14	5.62882e-12	0.72	1.43267e-16
SLC2A3	ENSG00000059804.16	solute carrier family 2 member 3	protein_coding	1.71	6.4	9.72745e-09	5.40996e-08	0.57	1.92832e-09
DUSP4	ENSG00000120875.9	dual specificity phosphatase 4	protein_coding	1.73	3.67	1.8264e-11	5.7106e-11	0.68	1.73632e-14
TXLNB	ENSG00000164440.15	taxilin beta	protein_coding	1.88	0.16	2.91242e-13	3.0693e-10	0.66	4.00865e-13
ARL11	ENSG00000152213.4	ADP ribosylation factor like GTPase 11	protein_coding	1.95	1.25	2.24008e-16	1.06747e-12	0.75	2.98817e-18
TTYH3	ENSG00000136295.15	tweety family member 3	protein_coding	1.98	7.61	2.23461e-15	6.59641e-13	0.75	8.74201e-19
SHMT2	ENSG00000182199.11	serine hydroxymethyltransferase 2	protein_coding	2.02	7.17	3.36499e-23	2.7712e-14	0.81	5.57477e-23
PPP1R3G	ENSG00000219607.4	protein phosphatase 1 regulatory subunit 3G	protein_coding	2.23	2.62	5.6354e-27	8.88806e-15	0.83	2.96498e-25
IL2RA	ENSG00000134460.18	interleukin 2 receptor subunit alpha	protein_coding	2.25	1.72	8.12302e-09	2.44609e-07	0.54	1.73878e-08
PYCARD	ENSG00000103490.14	PYD and CARD domain containing	protein_coding	2.27	3.21	2.70938e-18	6.11067e-13	0.75	7.11915e-19
ADM	ENSG00000148926.10	adrenomedullin	protein_coding	2.38	6.82	1.58615e-15	1.26727e-12	0.74	4.5092e-18
FCRL4	ENSG00000163518.11	Fc receptor like 4	protein_coding	2.44	-4.34	6.72772e-06	0.0226418	0.26	0.0206905
RGS5	ENSG00000143248.13	regulator of G protein signaling 5	protein_coding	2.48	10.36	3.8198e-19	1.99938e-12	0.74	1.34483e-17
FKBP10	ENSG00000141756.19	FKBP prolyl isomerase 10	protein_coding	2.5	6.89	6.17806e-17	8.76047e-13	0.75	1.80521e-18
SCD	ENSG00000099194.6	stearoyl-CoA desaturase	protein_coding	2.83	8.1	3.90531e-16	2.74764e-13	0.77	8.21787e-20
DCLK3	ENSG00000163673.7	doublecortin like kinase 3	protein_coding	2.87	-0.88	3.66822e-15	1.10707e-10	0.67	6.13815e-14
POU5F1	ENSG00000204531.20	POU class 5 homeobox 1	protein_coding	2.88	3.75	3.73307e-17	4.55057e-12	0.72	8.98489e-17
C6orf223	ENSG00000181577.16	chromosome 6 open reading frame 223	lncRNA	3.21	4.76	9.61281e-20	7.77088e-12	0.71	2.93388e-16
CDH8	ENSG00000150394.14	cadherin 8	protein_coding	3.24	0.24	1.69257e-16	3.93381e-13	0.76	2.20539e-19
COL5A3	ENSG00000080573.7	collagen type V alpha 3 chain	protein_coding	3.3	4.26	1.4454e-25	1.90771e-14	0.81	1.27799e-23
EGLN3	ENSG00000129521.15	egl-9 family hypoxia inducible factor 3	protein_coding	4.04	8.2	1.81532e-27	3.10007e-13	0.77	1.14675e-19

## Sheet: Table 7_miR-210-3p
gene	Gene_id	Description	Biotype	LogFC	LogCPM	QLF_FDR	MW_FDR	Spearman_correlation_coef	Spearman_correlation_FDR
VGLL1	ENSG00000102243.13	vestigial like family member 1	protein_coding	-5.9	2.27	1.01791e-13	7.61042e-15	-0.84	7.85369e-26
ADH1C	ENSG00000248144.6	alcohol dehydrogenase 1C (class I), gamma polypeptide	protein_coding	-5.78	3.75	3.71075e-24	7.37364e-15	-0.84	1.80525e-26
TFF1	ENSG00000160182.3	trefoil factor 1	protein_coding	-5.65	-0.68	1.00521e-13	8.93514e-08	-0.56	4.05474e-09
ODAM	ENSG00000109205.16	odontogenic, ameloblast associated	protein_coding	-5.59	-0.35	1.22886e-21	5.97276e-15	-0.86	1.0017e-27
TMEM52B	ENSG00000165685.8	transmembrane protein 52B	protein_coding	-5.32	6.89	3.2467e-18	4.8383e-13	-0.76	3.80068e-19
EHF	ENSG00000135373.13	ETS homologous factor	protein_coding	-5.09	6.41	1.74155e-18	7.61042e-15	-0.84	5.2137e-26
HS6ST2	ENSG00000171004.18	heparan sulfate 6-O-sulfotransferase 2	protein_coding	-4.92	4.71	5.64108e-15	1.37724e-14	-0.82	2.87034e-24
EPN3	ENSG00000049283.18	epsin 3	protein_coding	-4.89	3.39	7.37497e-19	6.96178e-15	-0.85	3.4174e-27
MOGAT2	ENSG00000166391.15	monoacylglycerol O-acyltransferase 2	protein_coding	-4.79	0.39	2.41402e-15	4.73864e-13	-0.76	3.5742e-19
RBP2	ENSG00000114113.6	retinol binding protein 2	protein_coding	-4.75	-0.07	6.27462e-27	8.3305e-14	-0.79	2.47471e-21
GRHL2	ENSG00000083307.12	grainyhead like transcription factor 2	protein_coding	-4.73	3.89	6.1771e-13	1.63131e-14	-0.82	6.42742e-24
FAM3B	ENSG00000183844.17	FAM3 metabolism regulating signaling molecule B	protein_coding	-4.65	3.72	2.73632e-22	7.37364e-15	-0.85	1.04591e-26
SMIM5	ENSG00000204323.5	small integral membrane protein 5	protein_coding	-4.51	4.24	2.01662e-21	1.90771e-14	-0.81	1.27799e-23
ERVMER34-1	ENSG00000226887.8	endogenous retrovirus group MER34 member 1, envelope	protein_coding	-4.39	3.15	5.00235e-20	7.61042e-15	-0.84	5.983e-26
FAM83B	ENSG00000168143.9	family with sequence similarity 83 member B	protein_coding	-4.28	2.7	2.95427e-12	1.06423e-14	-0.83	7.76743e-25
TMPRSS4	ENSG00000137648.19	transmembrane serine protease 4	protein_coding	-4.22	4.07	1.08928e-12	2.06986e-14	-0.81	1.78474e-23
TNNC1	ENSG00000114854.8	troponin C1, slow skeletal and cardiac type	protein_coding	-4.08	1.81	1.65293e-25	9.60087e-15	-0.83	4.57618e-25
PRR15	ENSG00000176532.4	proline rich 15	protein_coding	-4.05	3.99	1.31113e-22	7.61042e-15	-0.84	7.85369e-26
PAGE4	ENSG00000101951.17	PAGE family member 4	protein_coding	-4.04	-2.89	9.24406e-13	5.99415e-09	-0.61	6.34847e-11
SPINK4	ENSG00000122711.9	serine peptidase inhibitor Kazal type 4	protein_coding	-4.03	-3.14	8.07349e-14	3.44106e-08	-0.58	9.72357e-10
SULT2B1	ENSG00000088002.12	sulfotransferase family 2B member 1	protein_coding	-3.95	1.72	1.87265e-13	2.27399e-08	-0.59	5.17916e-10
ANXA10	ENSG00000109511.12	annexin A10	protein_coding	-3.69	-1.39	4.23428e-07	0.0162751	0.27	0.0145865
TJP3	ENSG00000105289.15	tight junction protein 3	protein_coding	-3.65	3.46	2.61631e-20	7.37364e-15	-0.84	2.22947e-26
SLC24A2	ENSG00000155886.11	solute carrier family 24 member 2	protein_coding	-3.65	0	3.5286e-12	3.39006e-14	-0.8	1.1814e-22
TTPA	ENSG00000137561.5	alpha tocopherol transfer protein	protein_coding	-3.62	-0.21	2.82748e-14	4.32549e-13	-0.76	2.83552e-19
TACR3	ENSG00000169836.5	tachykinin receptor 3	protein_coding	-3.57	-0.98	2.98949e-11	2.49979e-11	-0.7	3.38786e-15
LYPD6	ENSG00000187123.15	LY6/PLAUR domain containing 6	protein_coding	-3.46	1.64	4.30312e-23	1.28419e-14	-0.82	1.92221e-24
APOA2	ENSG00000158874.11	apolipoprotein A2	protein_coding	-3.46	-1.22	1.65816e-07	0.000457507	-0.38	0.000273083
FGFBP1	ENSG00000137440.5	fibroblast growth factor binding protein 1	protein_coding	-3.45	-0.66	7.922e-10	1.30797e-14	-0.82	2.18754e-24
FAM167A	ENSG00000154319.16	family with sequence similarity 167 member A	protein_coding	-3.43	4.3	6.8776e-20	9.60087e-15	-0.83	4.57618e-25
SLC2A12	ENSG00000146411.6	solute carrier family 2 member 12	protein_coding	-3.4	3.04	2.83014e-18	1.73172e-14	-0.81	8.49624e-24
PRRG2	ENSG00000126460.11	proline rich and Gla domain 2	protein_coding	-3.28	2.81	6.05433e-29	7.43523e-15	-0.84	3.32846e-26
SFTA2	ENSG00000196260.5	surfactant associated 2	protein_coding	-3.2	0.29	6.33325e-11	7.72016e-13	-0.75	1.2974e-18
ACSF2	ENSG00000167107.13	acyl-CoA synthetase family member 2	protein_coding	-3.15	6.51	5.26899e-16	4.28332e-11	-0.69	9.87528e-15
C1orf226	ENSG00000239887.6	chromosome 1 open reading frame 226	protein_coding	-3.12	3.78	1.749e-25	7.61042e-15	-0.84	7.85369e-26
SLC16A5	ENSG00000170190.16	solute carrier family 16 member 5	protein_coding	-3.12	5.32	2.73461e-18	5.30546e-14	-0.79	5.6459e-22
CYP4F3	ENSG00000186529.16	cytochrome P450 family 4 subfamily F member 3	protein_coding	-3.06	4.36	5.0162e-08	1.32682e-05	-0.46	3.72065e-06
PSG4	ENSG00000243137.8	pregnancy specific beta-1-glycoprotein 4	protein_coding	-3.03	0.21	1.73762e-06	1.77542e-06	-0.5	2.69124e-07
SYNPR	ENSG00000163630.11	synaptoporin	protein_coding	-3.01	-3.5	8.0401e-08	8.37153e-07	-0.52	9.66769e-08
VSNL1	ENSG00000163032.12	visinin like 1	protein_coding	-2.99	0.27	1.43105e-10	2.18469e-13	-0.77	4.37965e-20
PAPPA	ENSG00000182752.10	pappalysin 1	protein_coding	-2.99	4.86	1.57588e-16	2.69039e-14	-0.81	4.91045e-23
TUBAL3	ENSG00000178462.12	tubulin alpha like 3	protein_coding	-2.99	1.38	1.09452e-05	1.81206e-09	-0.63	8.87373e-12
LIPH	ENSG00000163898.10	lipase H	protein_coding	-2.95	4.52	9.31292e-10	5.86688e-13	-0.76	6.40563e-19
KCNQ2	ENSG00000075043.19	potassium voltage-gated channel subfamily Q member 2	protein_coding	-2.94	-1.74	1.38e-07	1.11383e-05	-0.47	2.9762e-06
KCNK10	ENSG00000100433.16	potassium two pore domain channel subfamily K member 10	protein_coding	-2.93	1.79	1.2753e-11	7.99323e-06	-0.47	1.94538e-06
FUT2	ENSG00000176920.13	fucosyltransferase 2	protein_coding	-2.92	1	6.46263e-15	2.13303e-10	-0.66	2.06896e-13
REEP6	ENSG00000115255.12	receptor accessory protein 6	protein_coding	-2.9	3.82	2.70138e-15	5.04037e-13	-0.76	4.23161e-19
SCN2A	ENSG00000136531.18	sodium voltage-gated channel alpha subunit 2	protein_coding	-2.86	3	4.26282e-10	1.01849e-13	-0.78	4.55728e-21
PTPRO	ENSG00000151490.15	protein tyrosine phosphatase receptor type O	protein_coding	-2.83	5.79	7.90341e-10	0.00103167	-0.36	0.000695592
DOK7	ENSG00000175920.18	docking protein 7	protein_coding	-2.83	1.63	9.28565e-14	9.36483e-13	-0.75	2.11673e-18
SOWAHA	ENSG00000198944.6	sosondowah ankyrin repeat domain family member A	protein_coding	-2.83	3.29	2.36802e-13	7.61042e-15	-0.84	9.54133e-26
KCNJ6	ENSG00000157542.11	potassium inwardly rectifying channel subfamily J member 6	protein_coding	-2.81	-2.05	3.58242e-13	7.70177e-11	-0.68	3.08393e-14
PLA2R1	ENSG00000153246.13	phospholipase A2 receptor 1	protein_coding	-2.8	6	2.49548e-14	2.80512e-07	-0.54	2.11206e-08
NECTIN4	ENSG00000143217.9	nectin cell adhesion molecule 4	protein_coding	-2.78	2.19	1.73397e-12	1.70177e-13	-0.78	2.1063e-20
ERP27	ENSG00000139055.7	endoplasmic reticulum protein 27	protein_coding	-2.7	4.59	1.91855e-11	1.45096e-13	-0.78	1.32245e-20
TMC5	ENSG00000103534.17	transmembrane channel like 5	protein_coding	-2.68	0.92	4.29791e-07	4.60057e-06	-0.49	9.50726e-07
ATP10B	ENSG00000118322.14	ATPase phospholipid transporting 10B (putative)	protein_coding	-2.63	0.17	5.28222e-08	3.3983e-08	-0.58	9.56078e-10
S100A14	ENSG00000189334.9	S100 calcium binding protein A14	protein_coding	-2.63	3.25	3.39211e-17	2.33153e-14	-0.81	2.86846e-23
ASS1	ENSG00000130707.18	argininosuccinate synthase 1	protein_coding	-2.62	9.14	1.06019e-12	1.52346e-06	-0.51	2.19197e-07
PRR15L	ENSG00000167183.3	proline rich 15 like	protein_coding	-2.55	4.25	2.42121e-10	1.76453e-13	-0.77	2.35537e-20
ABAT	ENSG00000183044.12	4-aminobutyrate aminotransferase	protein_coding	-2.51	6.77	1.19011e-11	3.04573e-08	-0.58	8.09739e-10
LGR5	ENSG00000139292.13	leucine rich repeat containing G protein-coupled receptor 5	protein_coding	-2.48	0.98	5.82226e-05	3.68534e-09	-0.62	2.88529e-11
ADH6	ENSG00000172955.17	alcohol dehydrogenase 6 (class V)	protein_coding	-2.47	4.7	2.67258e-07	0.00110555	-0.36	0.000752643
SHISA2	ENSG00000180730.5	shisa family member 2	protein_coding	-2.46	2.99	3.04546e-10	9.89568e-13	-0.75	2.45276e-18
STX19	ENSG00000178750.3	syntaxin 19	protein_coding	-2.39	-1.78	8.75709e-12	8.88333e-08	-0.56	4.02414e-09
TMC4	ENSG00000167608.12	transmembrane channel like 4	protein_coding	-2.37	5.68	6.78864e-11	1.90124e-13	-0.77	2.9485e-20
SERTM1	ENSG00000180440.4	serine rich and transmembrane domain containing 1	protein_coding	-2.29	-2.25	6.21304e-09	4.47594e-10	-0.65	7.87266e-13
BTG2	ENSG00000159388.6	BTG anti-proliferation factor 2	protein_coding	-2.28	8.36	2.34196e-18	5.23522e-13	-0.76	4.69584e-19
HAND2	ENSG00000164107.9	heart and neural crest derivatives expressed 2	protein_coding	-2.26	-4.29	1.1553e-06	0.000108219	-0.42	4.96126e-05
BCL2L15	ENSG00000188761.13	BCL2 like 15	protein_coding	-2.25	1.82	2.72009e-08	2.03611e-06	-0.5	3.23406e-07
ADH1A	ENSG00000187758.8	alcohol dehydrogenase 1A (class I), alpha polypeptide	protein_coding	-2.22	-2.86	1.65239e-10	1.35521e-10	-0.67	8.92705e-14
HOMER1	ENSG00000152413.15	homer scaffold protein 1	protein_coding	-2.22	4.12	2.49506e-19	2.58081e-14	-0.81	4.27152e-23
CGN	ENSG00000143375.15	cingulin	protein_coding	-2.2	5.83	3.01717e-16	1.90771e-14	-0.81	1.27799e-23
GPAT3	ENSG00000138678.11	glycerol-3-phosphate acyltransferase 3	protein_coding	-2.16	6.12	1.57884e-09	2.63269e-13	-0.77	7.33044e-20
MUC1	ENSG00000185499.16	mucin 1, cell surface associated	protein_coding	-2.14	7.33	9.45205e-14	1.73172e-14	-0.81	8.49624e-24
GABRB2	ENSG00000145864.14	gamma-aminobutyric acid type A receptor subunit beta2	protein_coding	-2.14	1.25	2.57587e-07	5.04321e-11	-0.69	1.36337e-14
STYK1	ENSG00000060140.9	serine/threonine/tyrosine kinase 1	protein_coding	-2.13	0.29	6.52957e-11	6.51853e-07	-0.52	6.8732e-08
SLITRK1	ENSG00000178235.8	SLIT and NTRK like family member 1	protein_coding	-2.11	-3.64	3.12535e-07	9.20669e-07	-0.52	1.10384e-07
WNT11	ENSG00000085741.13	Wnt family member 11	protein_coding	-2.1	0.77	2.07316e-07	7.6388e-11	-0.68	3.03689e-14
BMP6	ENSG00000153162.9	bone morphogenetic protein 6	protein_coding	-2.08	4.81	2.49049e-12	5.21544e-08	-0.57	1.82635e-09
ETV4	ENSG00000175832.13	ETS variant transcription factor 4	protein_coding	-2.08	1.09	1.16039e-10	7.15805e-12	-0.72	2.45214e-16
H1-0	ENSG00000189060.5	H1,0 linker histone	protein_coding	-2.06	8.11	5.92563e-14	5.94082e-09	-0.61	6.27175e-11
NR3C2	ENSG00000151623.15	nuclear receptor subfamily 3 group C member 2	protein_coding	-2.04	5.53	2.85722e-17	2.69039e-14	-0.81	4.91045e-23
PSAT1	ENSG00000135069.14	phosphoserine aminotransferase 1	protein_coding	-2.04	6.04	9.86376e-06	9.20115e-08	-0.56	4.23767e-09
SLC5A3	ENSG00000198743.7	solute carrier family 5 member 3	protein_coding	-2.03	8.01	7.60553e-14	5.26135e-11	-0.69	1.47943e-14
PALM3	ENSG00000187867.10	paralemmin 3	protein_coding	-2.03	4.65	7.84211e-14	2.85339e-13	-0.77	9.16386e-20
HPGD	ENSG00000164120.14	15-hydroxyprostaglandin dehydrogenase	protein_coding	-2.02	5.33	6.2018e-09	3.60744e-10	-0.66	5.35724e-13
CASZ1	ENSG00000130940.15	castor zinc finger 1	protein_coding	-2.01	3.47	2.45049e-20	7.69691e-14	-0.79	1.93555e-21
PIP5K1B	ENSG00000107242.20	phosphatidylinositol-4-phosphate 5-kinase type 1 beta	protein_coding	-2	3.28	6.00513e-18	7.37234e-14	-0.79	1.70454e-21
AFAP1L2	ENSG00000169129.15	actin filament associated protein 1 like 2	protein_coding	-1.96	6.01	1.25983e-18	2.41728e-13	-0.77	5.82714e-20
SGK2	ENSG00000101049.17	serum/glucocorticoid regulated kinase 2	protein_coding	-1.95	5.03	3.06995e-19	3.28279e-14	-0.8	1.06589e-22
PLAG1	ENSG00000181690.8	PLAG1 zinc finger	protein_coding	-1.94	1.98	7.84972e-13	2.85339e-13	-0.77	9.16386e-20
PRTG	ENSG00000166450.13	protogenin	protein_coding	-1.91	2.51	3.36558e-11	1.33648e-13	-0.78	1.04287e-20
SUCNR1	ENSG00000198829.6	succinate receptor 1	protein_coding	-1.87	5.51	1.85596e-07	1.35438e-07	-0.55	7.44666e-09
AXDND1	ENSG00000162779.22	axonemal dynein light chain domain containing 1	protein_coding	-1.86	-1.54	1.26205e-10	7.96582e-10	-0.64	2.17514e-12
PRSS8	ENSG00000052344.16	serine protease 8	protein_coding	-1.85	5.99	2.03525e-12	6.87965e-13	-0.75	9.71966e-19
SLC38A4	ENSG00000139209.16	solute carrier family 38 member 4	protein_coding	-1.83	3.42	3.63179e-05	6.81702e-10	-0.65	1.65471e-12
ANXA9	ENSG00000143412.10	annexin A9	protein_coding	-1.83	4.68	1.89717e-22	8.03284e-15	-0.83	1.65086e-25
NUDT4	ENSG00000173598.14	nudix hydrolase 4	protein_coding	-1.83	6.53	5.79087e-24	2.26879e-14	-0.81	2.52579e-23
PPM1H	ENSG00000111110.12	protein phosphatase, Mg2+/Mn2+ dependent 1H	protein_coding	-1.82	5.46	1.90074e-14	1.90124e-13	-0.77	2.9485e-20
LARGE2	ENSG00000165905.18	LARGE xylosyl- and glucuronyltransferase 2	protein_coding	-1.82	4.16	5.09941e-11	1.09664e-13	-0.78	5.76356e-21
SPINK1	ENSG00000164266.11	serine peptidase inhibitor Kazal type 1	protein_coding	-1.8	3.6	0.000634648	4.21906e-07	-0.53	3.75235e-08
RIPPLY3	ENSG00000183145.9	ripply transcriptional repressor 3	protein_coding	-1.8	-1.11	1.87514e-09	1.73866e-10	-0.67	1.42207e-13
IGFBP2	ENSG00000115457.10	insulin like growth factor binding protein 2	protein_coding	-1.78	6.3	1.12182e-07	1.37654e-12	-0.74	5.51284e-18
PCDH7	ENSG00000169851.15	protocadherin 7	protein_coding	-1.76	3.27	3.06443e-09	3.19396e-10	-0.66	4.30851e-13
SLPI	ENSG00000124107.5	secretory leukocyte peptidase inhibitor	protein_coding	-1.76	6.18	0.00580587	2.46227e-06	-0.5	4.16807e-07
LRRC19	ENSG00000184434.8	leucine rich repeat containing 19	protein_coding	-1.76	5.44	3.47614e-08	6.58436e-12	-0.72	2.04481e-16
SHROOM3	ENSG00000138771.16	shroom family member 3	protein_coding	-1.75	5.79	1.59069e-11	8.76047e-13	-0.75	1.80521e-18
ARG2	ENSG00000081181.8	arginase 2	protein_coding	-1.74	5.35	2.82812e-05	4.36804e-12	-0.72	8.1916e-17
PEPD	ENSG00000124299.15	peptidase D	protein_coding	-1.74	7.95	2.12862e-11	2.46227e-06	-0.5	4.16807e-07
BCAS1	ENSG00000064787.13	brain enriched myelin associated protein 1	protein_coding	-1.74	2.59	0.00132194	2.83357e-10	-0.66	3.46758e-13
ACADSB	ENSG00000196177.13	acyl-CoA dehydrogenase short/branched chain	protein_coding	-1.72	7	5.85903e-15	3.57043e-12	-0.73	5.15717e-17
C6orf52	ENSG00000137434.11	chromosome 6 open reading frame 52	protein_coding	-1.72	-0.25	2.66284e-21	3.91449e-14	-0.8	2.02587e-22
PRSS35	ENSG00000146250.7	serine protease 35	protein_coding	-1.71	2.82	1.64898e-06	1.13738e-09	-0.64	4.01555e-12
UCHL1	ENSG00000154277.13	ubiquitin C-terminal hydrolase L1	protein_coding	-1.7	5.7	3.46919e-05	9.54341e-12	-0.71	4.57666e-16
C2orf15	ENSG00000273045.7	chromosome 2 open reading frame 15	protein_coding	-1.7	1.82	2.23983e-17	6.79479e-14	-0.79	1.32629e-21
PLAT	ENSG00000104368.19	plasminogen activator, tissue type	protein_coding	-1.69	6.82	1.80665e-16	3.10007e-13	-0.77	1.14675e-19
STK33	ENSG00000130413.15	serine/threonine kinase 33	protein_coding	-1.69	3.03	8.93294e-08	2.13387e-13	-0.77	4.13263e-20
GPD1L	ENSG00000152642.11	glycerol-3-phosphate dehydrogenase 1 like	protein_coding	-1.68	5.88	3.65416e-22	5.09454e-14	-0.79	4.96242e-22
ZDHHC2	ENSG00000104219.13	zinc finger DHHC-type palmitoyltransferase 2	protein_coding	-1.67	6.37	1.06068e-18	2.26879e-14	-0.81	2.52579e-23
KCNA1	ENSG00000111262.6	potassium voltage-gated channel subfamily A member 1	protein_coding	-1.67	-2.68	2.54e-05	2.46954e-11	-0.7	3.29749e-15
EVPL	ENSG00000167880.8	envoplakin	protein_coding	-1.65	5.01	2.5004e-13	1.06747e-12	-0.75	2.98817e-18
SLC22A15	ENSG00000163393.13	solute carrier family 22 member 15	protein_coding	-1.64	2.96	2.77087e-16	4.8383e-13	-0.76	3.80068e-19
CDKN1C	ENSG00000129757.14	cyclin dependent kinase inhibitor 1C	protein_coding	-1.62	5.51	8.98452e-13	5.7106e-11	-0.68	1.73632e-14
WASF3	ENSG00000132970.14	WASP family member 3	protein_coding	-1.62	3.1	6.43356e-18	8.70709e-14	-0.79	2.81003e-21
OXCT1	ENSG00000083720.13	3-oxoacid CoA-transferase 1	protein_coding	-1.59	6.34	2.51711e-09	2.78566e-12	-0.73	2.91759e-17
PLA2G4A	ENSG00000116711.10	phospholipase A2 group IVA	protein_coding	-1.59	3.69	1.95716e-11	2.04835e-10	-0.66	1.9208e-13
UGT8	ENSG00000174607.11	UDP glycosyltransferase 8	protein_coding	-1.59	6.23	4.15912e-13	2.256e-12	-0.73	1.79506e-17
RGN	ENSG00000130988.13	regucalcin	protein_coding	-1.59	4.81	2.48033e-11	4.21164e-08	-0.58	1.3239e-09
PPP1R1C	ENSG00000150722.10	protein phosphatase 1 regulatory inhibitor subunit 1C	protein_coding	-1.59	-0.08	1.85367e-05	5.58151e-10	-0.65	1.16352e-12
CKB	ENSG00000166165.13	creatine kinase B	protein_coding	-1.59	7.23	1.80176e-09	5.7106e-11	-0.68	1.73632e-14
DHRS2	ENSG00000100867.15	dehydrogenase/reductase 2	protein_coding	-1.59	1.95	0.0166586	6.23591e-08	-0.57	2.38368e-09
SORCS2	ENSG00000184985.16	sortilin related VPS10 domain containing receptor 2	protein_coding	-1.59	4.96	5.93838e-06	8.57967e-08	-0.56	3.82251e-09
SYNGR1	ENSG00000100321.15	synaptogyrin 1	protein_coding	-1.58	5.07	2.33359e-12	1.22447e-11	-0.71	7.7686e-16
CAB39L	ENSG00000102547.19	calcium binding protein 39 like	protein_coding	-1.58	4.94	7.49751e-19	8.3305e-14	-0.79	2.47471e-21
SAMD13	ENSG00000203943.9	sterile alpha motif domain containing 13	protein_coding	-1.58	-0.08	6.72895e-13	1.70019e-12	-0.74	9.10683e-18
CLMN	ENSG00000165959.12	calmin	protein_coding	-1.57	6.66	1.77155e-19	1.30797e-14	-0.82	2.18754e-24
HADH	ENSG00000138796.17	hydroxyacyl-CoA dehydrogenase	protein_coding	-1.56	6.8	2.06443e-18	1.45096e-13	-0.78	1.32245e-20
FREM2	ENSG00000150893.11	FRAS1 related extracellular matrix 2	protein_coding	-1.56	5.8	1.30443e-08	1.45096e-13	-0.78	1.32245e-20
PDP2	ENSG00000172840.7	pyruvate dehyrogenase phosphatase catalytic subunit 2	protein_coding	-1.55	4.59	4.7123e-24	2.58081e-14	-0.81	4.27152e-23
THSD7A	ENSG00000005108.16	thrombospondin type 1 domain containing 7A	protein_coding	-1.54	6.11	3.52354e-10	5.50528e-14	-0.79	6.39754e-22
MELTF	ENSG00000163975.12	melanotransferrin	protein_coding	-1.54	5.22	0.00687095	2.31061e-05	-0.45	7.48707e-06
ST6GALNAC2	ENSG00000070731.11	ST6 N-acetylgalactosaminide alpha-2,6-sialyltransferase 2	protein_coding	-1.52	1.43	9.65763e-07	3.332e-11	-0.69	6.01734e-15
DHRS11	ENSG00000278535.5	dehydrogenase/reductase 11	protein_coding	-1.52	3.74	1.01866e-19	1.51266e-13	-0.78	1.48915e-20
NPTX1	ENSG00000171246.6	neuronal pentraxin 1	protein_coding	-1.51	0.07	0.00032984	3.81683e-06	-0.49	7.44386e-07
FSTL5	ENSG00000168843.14	follistatin like 5	protein_coding	-1.51	-2.98	0.00059842	0.000742486	-0.37	0.000477485
AKR7A3	ENSG00000162482.5	aldo-keto reductase family 7 member A3	protein_coding	-1.5	5.17	4.87601e-05	0.000459211	-0.38	0.000274345
LDLR	ENSG00000130164.14	low density lipoprotein receptor	protein_coding	-1.49	5.07	7.02589e-09	1.16729e-08	-0.6	1.83818e-10
GRB14	ENSG00000115290.10	growth factor receptor bound protein 14	protein_coding	-1.49	4.44	2.80879e-07	1.45096e-13	-0.78	1.32245e-20
CA2	ENSG00000104267.10	carbonic anhydrase 2	protein_coding	-1.48	7.77	1.28591e-16	2.16722e-12	-0.73	1.63093e-17
TMEM38A	ENSG00000072954.7	transmembrane protein 38A	protein_coding	-1.47	3.5	1.71199e-09	1.70177e-13	-0.78	2.1063e-20
AK3	ENSG00000147853.17	adenylate kinase 3	protein_coding	-1.46	7.01	3.00408e-22	2.58081e-14	-0.81	4.27152e-23
BAG1	ENSG00000107262.26	BAG cochaperone 1	protein_coding	-1.46	6.62	7.94165e-21	4.43176e-14	-0.8	3.01616e-22
GPX2	ENSG00000176153.12	glutathione peroxidase 2	protein_coding	-1.45	1.24	0.00363369	1.62772e-12	-0.74	8.23059e-18
LIPG	ENSG00000101670.12	lipase G, endothelial type	protein_coding	-1.45	4.49	8.21603e-07	1.09343e-09	-0.64	3.75286e-12
ITM2C	ENSG00000135916.16	integral membrane protein 2C	protein_coding	-1.45	7.96	5.08968e-15	9.52435e-13	-0.75	2.22042e-18
CCN2	ENSG00000118523.6	cellular communication network factor 2	protein_coding	-1.45	8.26	2.36872e-09	1.33044e-09	-0.63	5.24824e-12
PRLR	ENSG00000113494.17	prolactin receptor	protein_coding	-1.44	5.57	0.000627122	6.86423e-06	-0.48	1.5987e-06
H2BC21	ENSG00000184678.10	H2B clustered histone 21	protein_coding	-1.44	4.59	1.46193e-08	7.20577e-07	-0.52	7.8908e-08
HAS2	ENSG00000170961.7	hyaluronan synthase 2	protein_coding	-1.43	1.3	3.95183e-05	4.97637e-05	-0.43	1.93595e-05
PPM1K	ENSG00000163644.15	protein phosphatase, Mg2+/Mn2+ dependent 1K	protein_coding	-1.43	5.38	7.50525e-19	1.1404e-13	-0.78	6.49171e-21
NTN4	ENSG00000074527.13	netrin 4	protein_coding	-1.42	8.02	3.74281e-10	1.30733e-10	-0.67	8.36774e-14
C5	ENSG00000106804.8	complement C5	protein_coding	-1.41	3.23	3.00549e-17	6.79479e-14	-0.79	1.32629e-21
TBC1D4	ENSG00000136111.14	TBC1 domain family member 4	protein_coding	-1.41	6.74	2.47573e-17	1.01849e-13	-0.78	4.55728e-21
IGFL1	ENSG00000188293.6	IGF like family member 1	protein_coding	-1.41	-3.08	0.0128545	0.0468256	-0.23	0.0446071
HSD17B1	ENSG00000108786.11	hydroxysteroid 17-beta dehydrogenase 1	protein_coding	-1.39	-1.21	6.89119e-12	6.58436e-12	-0.72	2.04481e-16
WLS	ENSG00000116729.14	Wnt ligand secretion mediator	protein_coding	-1.39	7.06	5.43409e-18	2.19611e-14	-0.81	2.21114e-23
TMEM158	ENSG00000249992.2	transmembrane protein 158	protein_coding	-1.38	1.54	6.10705e-05	2.11304e-08	-0.59	4.62596e-10
TLDC2	ENSG00000101342.10	TBC/LysM-associated domain containing 2	protein_coding	-1.37	0.1	3.41531e-09	8.49371e-07	-0.52	9.89389e-08
TBC1D30	ENSG00000111490.15	TBC1 domain family member 30	protein_coding	-1.35	1.27	1.96373e-16	3.34133e-13	-0.76	1.42167e-19
PIP4K2C	ENSG00000166908.18	phosphatidylinositol-5-phosphate 4-kinase type 2 gamma	protein_coding	-1.35	6.25	5.14976e-29	7.37364e-15	-0.84	2.01382e-26
AMFR	ENSG00000159461.15	autocrine motility factor receptor	protein_coding	-1.35	7.86	9.63836e-21	2.94001e-14	-0.8	7.17362e-23
GRAMD1C	ENSG00000178075.20	GRAM domain containing 1C	protein_coding	-1.35	5.04	1.60338e-12	6.59641e-13	-0.75	8.74201e-19
PIWIL1	ENSG00000125207.7	piwi like RNA-mediated gene silencing 1	protein_coding	-1.34	-1.83	2.53177e-07	5.51473e-07	-0.53	5.45294e-08
SUSD1	ENSG00000106868.17	sushi domain containing 1	protein_coding	-1.33	4.97	2.97436e-13	2.16722e-12	-0.73	1.63093e-17
TNFSF15	ENSG00000181634.8	TNF superfamily member 15	protein_coding	-1.32	3.3	6.89069e-10	7.32753e-11	-0.68	2.8051e-14
CNTNAP2	ENSG00000174469.23	contactin associated protein 2	protein_coding	-1.31	-0.29	7.16017e-06	3.76524e-09	-0.62	2.98939e-11
MYORG	ENSG00000164976.9	myogenesis regulating glycosidase (putative)	protein_coding	-1.3	5.41	5.42186e-14	6.87356e-12	-0.72	2.24187e-16
CDS1	ENSG00000163624.6	CDP-diacylglycerol synthase 1	protein_coding	-1.3	5.55	9.02594e-13	1.07818e-11	-0.71	5.95291e-16
USP53	ENSG00000145390.11	ubiquitin specific peptidase 53	protein_coding	-1.3	6.02	6.21216e-19	3.10007e-13	-0.77	1.14675e-19
RAC3	ENSG00000169750.9	Rac family small GTPase 3	protein_coding	-1.3	1.68	3.17361e-09	1.81329e-10	-0.67	1.53503e-13
GRB7	ENSG00000141738.14	growth factor receptor bound protein 7	protein_coding	-1.29	4.91	3.89949e-13	8.09121e-12	-0.71	3.20591e-16
PARM1	ENSG00000169116.11	prostate androgen-regulated mucin-like protein 1	protein_coding	-1.27	6.88	4.72983e-12	2.02116e-11	-0.7	2.19449e-15
IDNK	ENSG00000148057.16	IDNK gluconokinase	protein_coding	-1.27	3.67	6.68083e-12	1.09343e-09	-0.64	3.75286e-12
MYO5C	ENSG00000128833.13	myosin VC	protein_coding	-1.26	4.81	1.90653e-13	1.07818e-11	-0.71	5.95291e-16
LDHB	ENSG00000111716.14	lactate dehydrogenase B	protein_coding	-1.24	4.55	1.64691e-16	4.74798e-12	-0.72	9.86772e-17
ASB11	ENSG00000165192.14	ankyrin repeat and SOCS box containing 11	protein_coding	-1.24	-3.37	6.99341e-06	4.42674e-05	-0.44	1.6763e-05
ELF3	ENSG00000163435.16	E74 like ETS transcription factor 3	protein_coding	-1.24	6.28	1.41851e-07	1.8484e-06	-0.5	2.84196e-07
RASSF8	ENSG00000123094.15	Ras association domain family member 8	protein_coding	-1.24	5.95	1.11424e-19	2.94001e-14	-0.8	7.17362e-23
KIAA1522	ENSG00000162522.11	KIAA1522	protein_coding	-1.24	6.9	6.32464e-16	7.75912e-13	-0.75	1.32569e-18
APOO	ENSG00000184831.14	apolipoprotein O	protein_coding	-1.24	4.19	1.17807e-17	2.97619e-13	-0.77	1.02599e-19
GLYCTK	ENSG00000168237.18	glycerate kinase	protein_coding	-1.24	3.87	5.79758e-07	0.0091051	-0.29	0.00780599
CARMIL1	ENSG00000079691.18	capping protein regulator and myosin 1 linker 1	protein_coding	-1.24	5.52	1.17309e-22	1.90771e-14	-0.81	1.27799e-23
BLNK	ENSG00000095585.17	B cell linker	protein_coding	-1.23	4.59	1.24612e-11	6.11067e-13	-0.75	7.11915e-19
NEBL	ENSG00000078114.19	nebulette	protein_coding	-1.23	7.01	1.15992e-09	5.94928e-11	-0.68	1.8805e-14
MPP5	ENSG00000072415.10	membrane palmitoylated protein 5	protein_coding	-1.22	6.17	4.92241e-21	2.69039e-14	-0.81	4.91045e-23
EGR1	ENSG00000120738.8	early growth response 1	protein_coding	-1.21	9.25	6.44822e-05	1.63065e-05	-0.46	4.83033e-06
GJB1	ENSG00000169562.13	gap junction protein beta 1	protein_coding	-1.21	5.13	4.92204e-07	6.46467e-08	-0.57	2.51463e-09
GPHN	ENSG00000171723.16	gephyrin	protein_coding	-1.21	5.04	3.99927e-12	2.13303e-10	-0.66	2.06896e-13
CADM1	ENSG00000182985.18	cell adhesion molecule 1	protein_coding	-1.19	6.33	7.0619e-09	1.38212e-09	-0.63	5.60372e-12
SLC19A2	ENSG00000117479.15	solute carrier family 19 member 2	protein_coding	-1.19	4.65	3.12267e-07	8.09121e-12	-0.71	3.20591e-16
APOD	ENSG00000189058.9	apolipoprotein D	protein_coding	-1.19	3.99	0.000582325	2.77535e-09	-0.62	1.80661e-11
HIF1A	ENSG00000100644.17	hypoxia inducible factor 1 subunit alpha	protein_coding	-1.18	8.06	2.17063e-10	3.19396e-10	-0.66	4.30851e-13
COL9A3	ENSG00000092758.18	collagen type IX alpha 3 chain	protein_coding	-1.18	0.84	0.000888661	6.23591e-08	-0.57	2.38368e-09
PRRG1	ENSG00000130962.18	proline rich and Gla domain 1	protein_coding	-1.18	5.09	1.11985e-13	1.03646e-11	-0.71	5.46116e-16
MACROD1	ENSG00000133315.12	mono-ADP ribosylhydrolase 1	protein_coding	-1.18	4.49	3.28926e-09	1.30552e-08	-0.6	2.19082e-10
PHYH	ENSG00000107537.14	phytanoyl-CoA 2-hydroxylase	protein_coding	-1.18	6.57	1.71199e-09	3.1661e-06	-0.49	5.81858e-07
HIBCH	ENSG00000198130.16	3-hydroxyisobutyryl-CoA hydrolase	protein_coding	-1.18	6.11	3.6733e-10	4.07892e-07	-0.53	3.57855e-08
PEBP1	ENSG00000089220.5	phosphatidylethanolamine binding protein 1	protein_coding	-1.17	9.75	4.08736e-18	4.03427e-12	-0.73	6.82034e-17
SYNGR3	ENSG00000127561.15	synaptogyrin 3	protein_coding	-1.17	0.54	0.00013078	3.77712e-11	-0.69	7.71355e-15
MUC20	ENSG00000176945.17	mucin 20, cell surface associated	protein_coding	-1.17	5.35	4.62594e-05	1.72863e-07	-0.55	1.05904e-08
AUH	ENSG00000148090.12	AU RNA binding methylglutaconyl-CoA hydratase	protein_coding	-1.15	5.28	2.11196e-15	2.90259e-12	-0.73	3.20937e-17
CROT	ENSG00000005469.12	carnitine O-octanoyltransferase	protein_coding	-1.15	4.98	3.5636e-21	5.09454e-14	-0.79	4.96242e-22
SULT1A2	ENSG00000197165.11	sulfotransferase family 1A member 2	protein_coding	-1.15	-2.48	7.3152e-05	2.61599e-06	-0.5	4.51646e-07
CYSRT1	ENSG00000197191.6	cysteine rich tail 1	protein_coding	-1.15	-0.21	2.00534e-07	8.33502e-09	-0.6	1.079e-10
MAN1A1	ENSG00000111885.7	mannosidase alpha class 1A member 1	protein_coding	-1.13	7.67	4.01591e-14	5.63981e-13	-0.76	5.76896e-19
KCNJ15	ENSG00000157551.19	potassium inwardly rectifying channel subfamily J member 15	protein_coding	-1.13	8.06	1.43641e-05	2.54089e-06	-0.5	4.34627e-07
NNT	ENSG00000112992.18	nicotinamide nucleotide transhydrogenase	protein_coding	-1.13	7.46	2.7296e-12	3.42079e-12	-0.73	4.68622e-17
AQP4	ENSG00000171885.18	aquaporin 4	protein_coding	-1.12	2.95	0.00193117	0.000659641	-0.37	0.000416956
EPHX2	ENSG00000120915.14	epoxide hydrolase 2	protein_coding	-1.12	6.94	1.08223e-07	8.57967e-08	-0.56	3.82251e-09
GNAI1	ENSG00000127955.17	G protein subunit alpha i1	protein_coding	-1.11	6.3	8.28934e-13	4.76748e-10	-0.65	8.81648e-13
PLLP	ENSG00000102934.10	plasmolipin	protein_coding	-1.11	5.5	8.24829e-13	9.15293e-12	-0.71	4.18621e-16
NDUFA4	ENSG00000189043.10	NDUFA4 mitochondrial complex associated	protein_coding	-1.1	7.46	6.58501e-17	2.32336e-13	-0.77	5.20849e-20
CTSH	ENSG00000103811.18	cathepsin H	protein_coding	-1.1	8.11	1.69977e-11	1.77891e-11	-0.7	1.69333e-15
TST	ENSG00000128311.14	thiosulfate sulfurtransferase	protein_coding	-1.1	5.94	1.31387e-06	1.67828e-05	-0.46	5.01027e-06
HMGN5	ENSG00000198157.11	high mobility group nucleosome binding domain 5	protein_coding	-1.1	3.39	3.01876e-18	1.90124e-13	-0.77	2.9485e-20
SGPP1	ENSG00000126821.8	sphingosine-1-phosphate phosphatase 1	protein_coding	-1.1	5.88	9.6364e-15	6.11067e-13	-0.75	7.11915e-19
DCAF11	ENSG00000100897.18	DDB1 and CUL4 associated factor 11	protein_coding	-1.1	6.51	2.46981e-23	1.21056e-14	-0.82	1.44868e-24
KIF26B	ENSG00000162849.16	kinesin family member 26B	protein_coding	-1.1	4.01	0.000124655	8.57967e-08	-0.56	3.82251e-09
AP5M1	ENSG00000053770.12	adaptor related protein complex 5 subunit mu 1	protein_coding	-1.09	5.97	6.94882e-24	4.23608e-14	-0.8	2.63271e-22
TWSG1	ENSG00000128791.12	twisted gastrulation BMP signaling modulator 1	protein_coding	-1.09	6.66	4.81335e-14	2.256e-12	-0.73	1.79506e-17
GAD1	ENSG00000128683.14	glutamate decarboxylase 1	protein_coding	-1.09	2.34	0.0128575	1.3074e-07	-0.55	7.07606e-09
F3	ENSG00000117525.14	coagulation factor III, tissue factor	protein_coding	-1.08	4.05	0.00156935	8.27785e-10	-0.64	2.32698e-12
ABCA6	ENSG00000154262.13	ATP binding cassette subfamily A member 6	protein_coding	-1.07	2.42	0.00027005	4.52626e-08	-0.57	1.47542e-09
TSGA10	ENSG00000135951.16	testis specific 10	protein_coding	-1.07	2.6	2.06947e-12	6.87356e-12	-0.72	2.24187e-16
IER3	ENSG00000137331.12	immediate early response 3	protein_coding	-1.06	4.83	2.64828e-06	2.70575e-06	-0.5	4.72516e-07
RDH11	ENSG00000072042.13	retinol dehydrogenase 11	protein_coding	-1.06	6.72	5.74438e-21	6.56107e-14	-0.79	1.17593e-21
PHGDH	ENSG00000092621.13	phosphoglycerate dehydrogenase	protein_coding	-1.04	6.06	7.44014e-05	3.27609e-08	-0.58	9.04548e-10
NSUN7	ENSG00000179299.17	NOP2/Sun RNA methyltransferase family member 7	protein_coding	-1.04	2.71	2.15781e-08	5.43826e-13	-0.76	5.20997e-19
CYSTM1	ENSG00000120306.11	cysteine rich transmembrane module containing 1	protein_coding	-1.04	7.47	1.9294e-16	4.8383e-13	-0.76	3.80068e-19
MSI2	ENSG00000153944.12	musashi RNA binding protein 2	protein_coding	-1.04	7.11	6.95881e-14	3.49073e-13	-0.76	1.59208e-19
ID1	ENSG00000125968.9	inhibitor of DNA binding 1, HLH protein	protein_coding	-1.03	5.79	7.14713e-08	7.95744e-07	-0.52	9.04516e-08
MEST	ENSG00000106484.16	mesoderm specific transcript	protein_coding	-1.03	4.38	0.000236874	1.66928e-07	-0.55	1.0072e-08
MYO6	ENSG00000196586.16	myosin VI	protein_coding	-1.02	7.53	5.87955e-15	2.13387e-13	-0.77	4.13263e-20
EMCN	ENSG00000164035.10	endomucin	protein_coding	-1.02	6.88	2.58817e-06	1.98794e-07	-0.55	1.29358e-08
FHIT	ENSG00000189283.10	fragile histidine triad diadenosine triphosphatase	protein_coding	-1.02	3.75	8.7528e-13	1.15354e-10	-0.67	6.63113e-14
CPVL	ENSG00000106066.15	carboxypeptidase vitellogenic like	protein_coding	-1.02	7.17	2.21818e-08	5.8139e-08	-0.57	2.14651e-09
CRYL1	ENSG00000165475.15	crystallin lambda 1	protein_coding	-1.01	7.88	1.68296e-09	1.66928e-07	-0.55	1.0072e-08
HYAL1	ENSG00000114378.17	hyaluronidase 1	protein_coding	-1.01	5.91	4.38646e-10	1.60178e-10	-0.67	1.22243e-13
ELOVL3	ENSG00000119915.5	ELOVL fatty acid elongase 3	protein_coding	-1.01	-1.2	0.000591124	6.918e-09	-0.61	8.00305e-11
TNFRSF11B	ENSG00000164761.9	TNF receptor superfamily member 11b	protein_coding	-1	6.07	7.1323e-05	5.51473e-07	-0.53	5.45294e-08
TSPYL4	ENSG00000187189.11	TSPY like 4	protein_coding	-1	5.7	3.67471e-14	3.2182e-13	-0.76	1.27696e-19
HPDL	ENSG00000186603.6	4-hydroxyphenylpyruvate dioxygenase like	protein_coding	-1	-0.94	1.85255e-05	9.01565e-06	-0.47	2.27106e-06
GDPD3	ENSG00000102886.15	glycerophosphodiester phosphodiesterase domain containing 3	protein_coding	-1	1.68	0.00512884	0.00170176	-0.34	0.00122573
RSKR	ENSG00000167524.16	ribosomal protein S6 kinase related	protein_coding	-1	2.61	0.00251336	0.0294275	-0.25	0.0273862
NFAT5	ENSG00000102908.22	nuclear factor of activated T cells 5	protein_coding	-0.99	6.54	5.05229e-10	3.23218e-09	-0.62	2.32567e-11
DAAM1	ENSG00000100592.16	dishevelled associated activator of morphogenesis 1	protein_coding	-0.99	4.68	1.47502e-14	5.86207e-12	-0.72	1.56867e-16
VWA5A	ENSG00000110002.16	von Willebrand factor A domain containing 5A	protein_coding	-0.99	5.5	5.39641e-12	1.4773e-10	-0.67	1.05132e-13
BFSP1	ENSG00000125864.14	beaded filament structural protein 1	protein_coding	-0.99	1.28	7.94386e-08	1.10133e-06	-0.51	1.41237e-07
LETM2	ENSG00000165046.13	leucine zipper and EF-hand containing transmembrane protein 2	protein_coding	-0.99	1.97	7.60213e-10	1.00965e-09	-0.64	3.27574e-12
CCDC186	ENSG00000165813.20	coiled-coil domain containing 186	protein_coding	-0.99	5.63	4.54295e-15	8.42011e-13	-0.75	1.63051e-18
TLE4	ENSG00000106829.20	TLE family member 4, transcriptional corepressor	protein_coding	-0.98	4.15	9.44857e-15	1.55761e-12	-0.74	7.43313e-18
GOT1	ENSG00000120053.12	glutamic-oxaloacetic transaminase 1	protein_coding	-0.98	7.29	4.24342e-10	2.21857e-10	-0.66	2.22557e-13
PKIA	ENSG00000171033.13	cAMP-dependent protein kinase inhibitor alpha	protein_coding	-0.97	3.52	0.000243526	2.93981e-08	-0.58	7.66842e-10
GPT2	ENSG00000166123.14	glutamic--pyruvic transaminase 2	protein_coding	-0.97	5.23	0.000177671	3.07931e-05	-0.44	1.07095e-05
CYB5R2	ENSG00000166394.15	cytochrome b5 reductase 2	protein_coding	-0.97	2	1.8369e-06	1.18191e-09	-0.64	4.29089e-12
URB1-AS1	ENSG00000256073.3	URB1 antisense RNA 1 (head to head)	lncRNA	-0.97	2.27	6.97162e-11	5.80739e-10	-0.65	1.25096e-12
MNS1	ENSG00000138587.6	meiosis specific nuclear structural 1	protein_coding	-0.96	3.39	2.88776e-06	1.14533e-05	-0.47	3.08448e-06
ZNF804A	ENSG00000170396.9	zinc finger protein 804A	protein_coding	-0.96	0.28	0.0079308	0.0430347	-0.23	0.0408414
CAPN5	ENSG00000149260.18	calpain 5	protein_coding	-0.96	5.64	1.25147e-09	4.55057e-12	-0.72	8.98489e-17
CEND1	ENSG00000184524.6	cell cycle exit and neuronal differentiation 1	protein_coding	-0.95	-0.29	0.0138348	1.4935e-09	-0.63	6.39441e-12
PTPN21	ENSG00000070778.13	protein tyrosine phosphatase non-receptor type 21	protein_coding	-0.95	4.82	1.83334e-14	2.45745e-12	-0.73	2.18425e-17
LYPLAL1	ENSG00000143353.12	lysophospholipase like 1	protein_coding	-0.94	5.21	8.66685e-16	9.13908e-13	-0.75	2.00339e-18
FAM110B	ENSG00000169122.11	family with sequence similarity 110 member B	protein_coding	-0.94	4.18	1.0891e-07	3.51931e-08	-0.58	1.00881e-09
OMA1	ENSG00000162600.12	OMA1 zinc metallopeptidase	protein_coding	-0.93	3.87	1.98509e-17	3.10007e-13	-0.77	1.14675e-19
PEX7	ENSG00000112357.14	peroxisomal biogenesis factor 7	protein_coding	-0.93	3.73	1.16436e-14	5.86688e-13	-0.76	6.40563e-19
BCHE	ENSG00000114200.10	butyrylcholinesterase	protein_coding	-0.93	1.96	0.0398427	1.11201e-05	-0.47	2.97e-06
TRNT1	ENSG00000072756.17	tRNA nucleotidyl transferase 1	protein_coding	-0.93	3.85	5.87031e-18	1.84651e-12	-0.74	1.10893e-17
MIPOL1	ENSG00000151338.18	mirror-image polydactyly 1	protein_coding	-0.93	3.01	6.11003e-09	1.20311e-10	-0.67	7.16769e-14
BRCC3	ENSG00000185515.15	BRCA1/BRCA2-containing complex subunit 3	protein_coding	-0.93	4.51	4.91558e-16	9.89568e-13	-0.75	2.45276e-18
BCAR3	ENSG00000137936.18	BCAR3 adaptor protein, NSP family member	protein_coding	-0.93	5	2.09045e-14	8.7903e-12	-0.71	3.83341e-16
ITPR2	ENSG00000123104.12	inositol 1,4,5-trisphosphate receptor type 2	protein_coding	-0.92	6.59	1.02253e-07	1.26727e-12	-0.74	4.5092e-18
PRKX	ENSG00000183943.6	protein kinase X-linked	protein_coding	-0.92	5.8	1.58996e-07	0.00025879	-0.39	0.000140334
REM2	ENSG00000139890.10	RRAD and GEM like GTPase 2	protein_coding	-0.92	-1.82	7.25859e-06	1.10133e-06	-0.51	1.41237e-07
COBL	ENSG00000106078.19	cordon-bleu WH2 repeat protein	protein_coding	-0.92	5.51	9.0615e-07	7.45027e-09	-0.61	9.01897e-11
NR6A1	ENSG00000148200.17	nuclear receptor subfamily 6 group A member 1	protein_coding	-0.91	1.8	1.58762e-08	5.26135e-11	-0.69	1.47943e-14
LTBP1	ENSG00000049323.16	latent transforming growth factor beta binding protein 1	protein_coding	-0.91	6.77	0.000143813	0.0150401	-0.27	0.0134064
PLEKHA6	ENSG00000143850.16	pleckstrin homology domain containing A6	protein_coding	-0.91	6.5	9.27238e-11	1.53904e-10	-0.67	1.1343e-13
MCCC1	ENSG00000078070.13	methylcrotonoyl-CoA carboxylase 1	protein_coding	-0.91	5.59	8.79931e-13	7.6388e-11	-0.68	3.03689e-14
ZNF684	ENSG00000117010.17	zinc finger protein 684	protein_coding	-0.91	2.54	7.78075e-14	4.95766e-12	-0.72	1.08428e-16
PBLD	ENSG00000108187.16	phenazine biosynthesis like protein domain containing	protein_coding	-0.9	7.24	0.000141895	0.00203115	-0.34	0.00149509
AVPI1	ENSG00000119986.7	arginine vasopressin induced 1	protein_coding	-0.9	3.66	9.03585e-08	7.656e-10	-0.64	2.03041e-12
ST6GALNAC3	ENSG00000184005.11	ST6 N-acetylgalactosaminide alpha-2,6-sialyltransferase 3	protein_coding	-0.9	4.28	3.54095e-05	0.000817159	-0.36	0.000533071
FCGBP	ENSG00000275395.6	Fc fragment of IgG binding protein	protein_coding	-0.9	5.92	0.00885989	0.0228809	-0.26	0.0209793
MIR1915HG	ENSG00000204682.8	MIR1915 host gene	lncRNA	-0.9	2.73	7.18576e-07	3.11415e-09	-0.62	2.18568e-11
GLS	ENSG00000115419.13	glutaminase	protein_coding	-0.89	8.47	1.9279e-10	4.9084e-09	-0.61	4.61021e-11
RGS2	ENSG00000116741.8	regulator of G protein signaling 2	protein_coding	-0.89	5.65	0.00116901	2.97178e-06	-0.49	5.35211e-07
ASAP2	ENSG00000151693.11	ArfGAP with SH3 domain, ankyrin repeat and PH domain 2	protein_coding	-0.89	5.58	4.32222e-10	1.18191e-09	-0.64	4.29089e-12
CEACAM1	ENSG00000079385.23	CEA cell adhesion molecule 1	protein_coding	-0.89	5.14	3.07049e-07	8.57967e-08	-0.56	3.82251e-09
NKIRAS1	ENSG00000197885.11	NFKB inhibitor interacting Ras like 1	protein_coding	-0.89	3.57	1.0193e-16	4.26177e-13	-0.76	2.73709e-19
CLYBL	ENSG00000125246.15	citramalyl-CoA lyase	protein_coding	-0.89	4.36	3.67289e-09	3.23218e-09	-0.62	2.32567e-11
SDHD	ENSG00000204370.13	succinate dehydrogenase complex subunit D	protein_coding	-0.88	6.59	2.48244e-15	1.31916e-12	-0.74	4.98045e-18
MOB1B	ENSG00000173542.9	MOB kinase activator 1B	protein_coding	-0.88	6.55	2.28343e-05	2.35255e-12	-0.73	1.97867e-17
ZADH2	ENSG00000180011.7	zinc binding alcohol dehydrogenase domain containing 2	protein_coding	-0.88	5.7	1.81969e-16	9.83797e-14	-0.78	4.05925e-21
DENND1B	ENSG00000213047.13	DENN domain containing 1B	protein_coding	-0.88	4.92	2.12125e-11	1.03646e-11	-0.71	5.46116e-16
LRBA	ENSG00000198589.14	LPS responsive beige-like anchor protein	protein_coding	-0.88	7.27	6.92381e-12	2.40606e-10	-0.66	2.58052e-13
CCDC190	ENSG00000185860.13	coiled-coil domain containing 190	protein_coding	-0.88	-3.85	0.0472403	0.020643	-0.26	0.0187981
CD83	ENSG00000112149.10	CD83 molecule	protein_coding	-0.87	4.77	3.11345e-09	1.5529e-09	-0.63	6.83112e-12
CPEB4	ENSG00000113742.14	cytoplasmic polyadenylation element binding protein 4	protein_coding	-0.87	7.07	2.63598e-10	8.27785e-10	-0.64	2.32698e-12
TSPAN1	ENSG00000117472.10	tetraspanin 1	protein_coding	-0.87	8.2	0.003117	4.46295e-06	-0.49	9.13549e-07
MT-ATP6	ENSG00000198899.2	mitochondrially encoded ATP synthase membrane subunit 6	protein_coding	-0.87	12.37	3.65923e-07	6.09656e-07	-0.53	6.2663e-08
ABCD3	ENSG00000117528.14	ATP binding cassette subfamily D member 3	protein_coding	-0.86	6.78	4.28746e-13	5.86207e-12	-0.72	1.56867e-16
GNB5	ENSG00000069966.19	G protein subunit beta 5	protein_coding	-0.86	5.29	8.19441e-15	4.74798e-12	-0.72	9.86772e-17
ZNF460	ENSG00000197714.9	zinc finger protein 460	protein_coding	-0.86	1.35	3.81073e-08	6.94028e-08	-0.57	2.79411e-09
SACM1L	ENSG00000211456.13	SAC1 like phosphatidylinositide phosphatase	protein_coding	-0.86	6.06	8.0583e-14	1.33648e-13	-0.78	1.04287e-20
TMEM245	ENSG00000106771.13	transmembrane protein 245	protein_coding	-0.86	7.67	3.60689e-12	1.31916e-12	-0.74	4.98045e-18
PTBP3	ENSG00000119314.16	polypyrimidine tract binding protein 3	protein_coding	-0.85	7.38	3.72077e-10	7.96582e-10	-0.64	2.17514e-12
LIG4	ENSG00000174405.14	DNA ligase 4	protein_coding	-0.85	4.24	1.20892e-14	4.03427e-12	-0.73	6.82034e-17
CYP2C18	ENSG00000108242.13	cytochrome P450 family 2 subfamily C member 18	protein_coding	-0.85	-2.16	0.0445406	2.29433e-06	-0.5	3.79221e-07
DHCR7	ENSG00000172893.16	7-dehydrocholesterol reductase	protein_coding	-0.84	5.15	8.03014e-11	3.77712e-11	-0.69	7.71355e-15
FKBP1B	ENSG00000119782.14	FKBP prolyl isomerase 1B	protein_coding	-0.84	0.38	8.16085e-07	7.19119e-08	-0.57	2.945e-09
PAWR	ENSG00000177425.11	pro-apoptotic WT1 regulator	protein_coding	-0.84	6	1.11319e-10	4.03427e-12	-0.73	6.82034e-17
TSPYL1	ENSG00000189241.8	TSPY like 1	protein_coding	-0.84	7.47	4.51393e-14	2.35255e-12	-0.73	1.97867e-17
CYCS	ENSG00000172115.9	cytochrome c, somatic	protein_coding	-0.84	7.34	5.99656e-09	4.58052e-10	-0.65	8.21283e-13
DNAJC19	ENSG00000205981.8	DnaJ heat shock protein family (Hsp40) member C19	protein_coding	-0.84	5.27	3.35275e-13	4.40268e-10	-0.65	7.65256e-13
CYP4X1	ENSG00000186377.8	cytochrome P450 family 4 subfamily X member 1	protein_coding	-0.84	2.61	3.69746e-07	2.36324e-07	-0.54	1.65561e-08
KLHL8	ENSG00000145332.14	kelch like family member 8	protein_coding	-0.83	5.41	2.85806e-11	4.83924e-11	-0.69	1.25752e-14
KLHL15	ENSG00000174010.9	kelch like family member 15	protein_coding	-0.83	4.28	6.50037e-13	3.42079e-12	-0.73	4.68622e-17
PRMT9	ENSG00000164169.13	protein arginine methyltransferase 9	protein_coding	-0.83	4.04	1.98808e-13	4.18804e-12	-0.72	7.45805e-17
TOP2B	ENSG00000077097.15	DNA topoisomerase II beta	protein_coding	-0.82	7.16	1.01503e-15	9.54341e-12	-0.71	4.57666e-16
PLGRKT	ENSG00000107020.10	plasminogen receptor with a C-terminal lysine	protein_coding	-0.82	4.25	5.11303e-12	2.10578e-11	-0.7	2.38721e-15
FKBP4	ENSG00000004478.8	FKBP prolyl isomerase 4	protein_coding	-0.82	6.74	1.44711e-13	1.38514e-11	-0.71	1.00791e-15
DDAH1	ENSG00000153904.21	dimethylarginine dimethylaminohydrolase 1	protein_coding	-0.81	7.95	1.18852e-08	2.40606e-10	-0.66	2.58052e-13
ARHGEF3	ENSG00000163947.12	Rho guanine nucleotide exchange factor 3	protein_coding	-0.81	5.85	6.17247e-10	2.0319e-09	-0.63	1.07668e-11
SOWAHC	ENSG00000198142.5	sosondowah ankyrin repeat domain family member C	protein_coding	-0.81	5.54	7.73901e-07	2.90341e-07	-0.54	2.21752e-08
SYNC	ENSG00000162520.15	syncoilin, intermediate filament protein	protein_coding	-0.81	0.4	0.000641468	1.29559e-06	-0.51	1.7609e-07
SPAG16	ENSG00000144451.19	sperm associated antigen 16	protein_coding	-0.81	4.25	5.21351e-15	8.42011e-13	-0.75	1.63051e-18
GSTZ1	ENSG00000100577.19	glutathione S-transferase zeta 1	protein_coding	-0.81	4.01	4.33096e-09	1.18191e-09	-0.64	4.29089e-12
FGF18	ENSG00000156427.8	fibroblast growth factor 18	protein_coding	-0.81	-0.11	0.013988	0.000406221	-0.38	0.000237874
NUDT6	ENSG00000170917.14	nudix hydrolase 6	protein_coding	-0.81	1.57	2.78632e-12	7.6388e-11	-0.68	3.03689e-14
CAMK2N1	ENSG00000162545.6	calcium/calmodulin dependent protein kinase II inhibitor 1	protein_coding	-0.81	7.13	4.79888e-10	2.04835e-10	-0.66	1.9208e-13
MMUT	ENSG00000146085.8	methylmalonyl-CoA mutase	protein_coding	-0.81	6.34	6.21765e-12	2.02116e-11	-0.7	2.19449e-15
KIF1C	ENSG00000129250.12	kinesin family member 1C	protein_coding	-0.8	7.58	1.93593e-12	3.2814e-12	-0.73	4.26237e-17
LHPP	ENSG00000107902.14	phospholysine phosphohistidine inorganic pyrophosphate phosphatase	protein_coding	-0.8	4.75	6.95821e-07	3.21529e-07	-0.54	2.56182e-08
PTGR2	ENSG00000140043.11	prostaglandin reductase 2	protein_coding	-0.79	1.02	2.22912e-08	3.81436e-07	-0.53	3.25691e-08
CSRNP1	ENSG00000144655.15	cysteine and serine rich nuclear protein 1	protein_coding	-0.79	6.01	9.0173e-05	0.000142779	-0.41	6.93282e-05
ACVR1B	ENSG00000135503.13	activin A receptor type 1B	protein_coding	-0.78	6.91	4.01124e-14	1.55761e-12	-0.74	7.43313e-18
MED20	ENSG00000124641.16	mediator complex subunit 20	protein_coding	-0.78	4.28	6.78448e-20	4.92429e-14	-0.8	4.38842e-22
SYK	ENSG00000165025.15	spleen associated tyrosine kinase	protein_coding	-0.78	5.99	3.51453e-07	4.5167e-07	-0.53	4.12643e-08
SUMF1	ENSG00000144455.14	sulfatase modifying factor 1	protein_coding	-0.77	5.99	9.06696e-13	5.94928e-11	-0.68	1.8805e-14
HMGCL	ENSG00000117305.15	3-hydroxy-3-methylglutaryl-CoA lyase	protein_coding	-0.77	6.42	7.67477e-10	1.40173e-07	-0.55	7.82872e-09
KLHL2	ENSG00000109466.14	kelch like family member 2	protein_coding	-0.77	4.8	2.38246e-14	1.31916e-12	-0.74	4.98045e-18
MIGA2	ENSG00000148343.18	mitoguardin 2	protein_coding	-0.77	4	5.47344e-11	2.19261e-11	-0.7	2.59634e-15
XPA	ENSG00000136936.11	XPA, DNA damage recognition and repair factor	protein_coding	-0.76	3.85	1.47329e-12	3.94332e-11	-0.69	8.38673e-15
AGL	ENSG00000162688.17	amylo-alpha-1, 6-glucosidase, 4-alpha-glucanotransferase	protein_coding	-0.76	5.88	5.19711e-11	8.29457e-11	-0.68	3.55472e-14
CXADR	ENSG00000154639.19	CXADR Ig-like cell adhesion molecule	protein_coding	-0.76	5.36	0.00033573	1.52346e-06	-0.51	2.19197e-07
EPB41L1	ENSG00000088367.23	erythrocyte membrane protein band 4,1 like 1	protein_coding	-0.76	7.43	1.18861e-13	1.21568e-12	-0.74	4.07561e-18
PPP1R9A	ENSG00000158528.12	protein phosphatase 1 regulatory subunit 9A	protein_coding	-0.76	4.98	1.35142e-07	1.38212e-09	-0.63	5.60372e-12
ANKRD46	ENSG00000186106.11	ankyrin repeat domain 46	protein_coding	-0.76	5.28	5.25221e-12	7.45034e-12	-0.72	2.6797e-16
CYB5D2	ENSG00000167740.10	cytochrome b5 domain containing 2	protein_coding	-0.76	5.25	8.21171e-17	4.26177e-13	-0.76	2.73709e-19
TBC1D16	ENSG00000167291.16	TBC1 domain family member 16	protein_coding	-0.75	7.37	6.21447e-05	0.0158655	-0.27	0.0141956
MAP4K3	ENSG00000011566.15	mitogen-activated protein kinase kinase kinase kinase 3	protein_coding	-0.75	5.67	4.20174e-11	3.34133e-13	-0.76	1.42167e-19
SCML2	ENSG00000102098.19	Scm polycomb group protein like 2	protein_coding	-0.75	0.34	6.80722e-07	8.57967e-08	-0.56	3.82251e-09
CDC37L1	ENSG00000106993.12	cell division cycle 37 like 1	protein_coding	-0.75	4.62	1.6745e-11	3.472e-11	-0.69	6.53366e-15
IFT74	ENSG00000096872.17	intraflagellar transport 74	protein_coding	-0.75	4.45	4.62831e-14	3.63227e-13	-0.76	1.7752e-19
EML2	ENSG00000125746.18	EMAP like 2	protein_coding	-0.75	5.09	6.45659e-11	1.36073e-10	-0.67	9.02425e-14
MST1R	ENSG00000164078.13	macrophage stimulating 1 receptor	protein_coding	-0.75	0.91	0.000941845	8.61406e-05	-0.42	3.77653e-05
RHOD	ENSG00000173156.7	ras homolog family member D	protein_coding	-0.75	3.68	1.05715e-05	4.89257e-06	-0.48	1.03016e-06
SMDT1	ENSG00000183172.9	single-pass membrane protein with aspartate rich tail 1	protein_coding	-0.75	5.39	1.0986e-13	1.70315e-11	-0.7	1.55102e-15
RALGPS2	ENSG00000116191.17	Ral GEF with PH domain and SH3 binding motif 2	protein_coding	-0.74	4.79	7.88495e-12	4.11098e-11	-0.69	9.10405e-15
GNPNAT1	ENSG00000100522.10	glucosamine-phosphate N-acetyltransferase 1	protein_coding	-0.74	3.87	6.49955e-11	3.71772e-12	-0.73	5.66054e-17
NYNRIN	ENSG00000205978.6	NYN domain and retroviral integrase containing	protein_coding	-0.74	5.38	0.000170219	4.60057e-06	-0.49	9.50726e-07
ABLIM1	ENSG00000099204.20	actin binding LIM protein 1	protein_coding	-0.73	8.03	1.06137e-10	4.28332e-11	-0.69	9.87528e-15
SLMAP	ENSG00000163681.16	sarcolemma associated protein	protein_coding	-0.73	5.95	1.46939e-13	1.38514e-11	-0.71	1.00791e-15
ZC2HC1C	ENSG00000119703.15	zinc finger C2HC-type containing 1C	protein_coding	-0.73	3	1.91082e-07	1.05072e-09	-0.64	3.50682e-12
DYNLT3	ENSG00000165169.11	dynein light chain Tctex-type 3	protein_coding	-0.73	5.84	9.97048e-12	4.8383e-13	-0.76	3.80068e-19
SYDE2	ENSG00000097096.9	synapse defective Rho GTPase homolog 2	protein_coding	-0.73	3	1.74381e-05	8.97825e-09	-0.6	1.21483e-10
SLC25A30	ENSG00000174032.17	solute carrier family 25 member 30	protein_coding	-0.72	6.21	4.56936e-09	3.75359e-10	-0.65	5.75413e-13
KTN1	ENSG00000126777.18	kinectin 1	protein_coding	-0.72	7.96	2.6933e-12	4.4567e-11	-0.69	1.06951e-14
SUCLA2	ENSG00000136143.16	succinate-CoA ligase ADP-forming subunit beta	protein_coding	-0.72	6.13	5.60858e-10	9.54341e-12	-0.71	4.57666e-16
MRPL19	ENSG00000115364.14	mitochondrial ribosomal protein L19	protein_coding	-0.72	5.81	1.02857e-16	3.10007e-13	-0.77	1.14675e-19
MPV17L2	ENSG00000254858.10	MPV17 mitochondrial inner membrane protein like 2	protein_coding	-0.72	3.43	1.4702e-08	9.3239e-09	-0.6	1.28961e-10
STK26	ENSG00000134602.16	serine/threonine kinase 26	protein_coding	-0.72	3.1	3.39537e-05	6.04465e-05	-0.43	2.45542e-05
ALDH5A1	ENSG00000112294.14	aldehyde dehydrogenase 5 family member A1	protein_coding	-0.71	5.86	7.54333e-06	1.4935e-09	-0.63	6.39441e-12
ANXA11	ENSG00000122359.18	annexin A11	protein_coding	-0.71	8.19	1.30594e-13	6.87356e-12	-0.72	2.24187e-16
DLD	ENSG00000091140.14	dihydrolipoamide dehydrogenase	protein_coding	-0.71	7.17	1.85771e-11	1.50379e-11	-0.7	1.19773e-15
RBBP8	ENSG00000101773.19	RB binding protein 8, endonuclease	protein_coding	-0.71	5.96	3.96562e-07	7.71454e-08	-0.56	3.26838e-09
SEMA5A	ENSG00000112902.12	semaphorin 5A	protein_coding	-0.71	6.62	0.00424646	0.0195625	-0.26	0.0177601
EPM2AIP1	ENSG00000178567.8	EPM2A interacting protein 1	protein_coding	-0.71	5.45	2.52989e-12	9.41594e-11	-0.68	4.51066e-14
SLC25A15	ENSG00000102743.15	solute carrier family 25 member 15	protein_coding	-0.71	3.75	3.15822e-05	1.03646e-11	-0.71	5.46116e-16
GFM1	ENSG00000168827.15	G elongation factor mitochondrial 1	protein_coding	-0.71	6.09	4.79261e-14	1.93523e-11	-0.7	2.01142e-15
IRAK1BP1	ENSG00000146243.14	interleukin 1 receptor associated kinase 1 binding protein 1	protein_coding	-0.71	3.29	3.79611e-10	2.02116e-11	-0.7	2.19449e-15
ANO10	ENSG00000160746.13	anoctamin 10	protein_coding	-0.71	5.63	1.36389e-12	1.32852e-11	-0.71	9.23727e-16
SCAMP4	ENSG00000227500.10	secretory carrier membrane protein 4	protein_coding	-0.71	6.13	1.33659e-10	1.32852e-11	-0.71	9.23727e-16
CRYBG3	ENSG00000080200.10	crystallin beta-gamma domain containing 3	protein_coding	-0.71	4.68	9.82805e-06	7.71454e-08	-0.56	3.26838e-09
ITGA2	ENSG00000164171.11	integrin subunit alpha 2	protein_coding	-0.7	6.25	9.11776e-06	6.30193e-07	-0.53	6.56076e-08
ANKRD28	ENSG00000206560.11	ankyrin repeat domain 28	protein_coding	-0.7	5.49	3.19306e-14	2.19261e-11	-0.7	2.59634e-15
SLC30A9	ENSG00000014824.14	solute carrier family 30 member 9	protein_coding	-0.7	6.97	2.30896e-13	3.57043e-12	-0.73	5.15717e-17
GBA2	ENSG00000070610.14	glucosylceramidase beta 2	protein_coding	-0.7	6.4	5.67201e-11	4.58052e-10	-0.65	8.21283e-13
SQLE	ENSG00000104549.12	squalene epoxidase	protein_coding	-0.69	4.69	2.02453e-07	1.0434e-08	-0.6	1.54054e-10
ABCC5	ENSG00000114770.17	ATP binding cassette subfamily C member 5	protein_coding	-0.69	5.28	3.12987e-07	1.36073e-10	-0.67	9.02425e-14
MTFR1L	ENSG00000117640.18	mitochondrial fission regulator 1 like	protein_coding	-0.69	5.55	1.57656e-11	6.29828e-10	-0.65	1.44071e-12
C4orf19	ENSG00000154274.15	chromosome 4 open reading frame 19	protein_coding	-0.69	3.99	8.24664e-05	8.0266e-09	-0.6	1.0162e-10
ZNF441	ENSG00000197044.11	zinc finger protein 441	protein_coding	-0.69	3.81	7.73358e-09	2.11225e-09	-0.63	1.14888e-11
BBOF1	ENSG00000119636.16	basal body orientation factor 1	protein_coding	-0.69	2.94	1.20034e-13	6.58436e-12	-0.72	2.04481e-16
CFAP54	ENSG00000188596.11	cilia and flagella associated protein 54	protein_coding	-0.69	-0.21	0.00021	2.88061e-06	-0.5	5.13482e-07
CCDC198	ENSG00000100557.10	coiled-coil domain containing 198	protein_coding	-0.69	6.42	4.69089e-07	6.17581e-09	-0.61	6.67197e-11
RAB11FIP2	ENSG00000107560.12	RAB11 family interacting protein 2	protein_coding	-0.68	5.47	5.68853e-08	5.80739e-10	-0.65	1.25096e-12
HEATR5A	ENSG00000129493.15	HEAT repeat containing 5A	protein_coding	-0.68	4.2	2.24596e-13	4.36804e-12	-0.72	8.1916e-17
TSTD1	ENSG00000215845.11	thiosulfate sulfurtransferase like domain containing 1	protein_coding	-0.68	4.41	1.65446e-08	1.00498e-08	-0.6	1.452e-10
DUSP6	ENSG00000139318.8	dual specificity phosphatase 6	protein_coding	-0.67	6.83	9.83656e-06	0.000101154	-0.42	4.58598e-05
GMFB	ENSG00000197045.13	glia maturation factor beta	protein_coding	-0.67	6.31	1.35249e-10	5.62882e-12	-0.72	1.43267e-16
TFDP2	ENSG00000114126.18	transcription factor Dp-2	protein_coding	-0.67	6.26	3.61795e-08	2.44579e-08	-0.58	5.79312e-10
KIAA0895	ENSG00000164542.13	KIAA0895	protein_coding	-0.67	4.27	5.15757e-08	1.38212e-09	-0.63	5.60372e-12
GULP1	ENSG00000144366.16	GULP PTB domain containing engulfment adaptor 1	protein_coding	-0.67	5.04	0.000351317	2.70575e-06	-0.5	4.72516e-07
SLC44A2	ENSG00000129353.15	solute carrier family 44 member 2	protein_coding	-0.67	8.21	8.27567e-08	1.8533e-07	-0.55	1.17032e-08
FOXRED2	ENSG00000100350.15	FAD dependent oxidoreductase domain containing 2	protein_coding	-0.67	4.54	3.40204e-05	1.21797e-07	-0.56	6.38627e-09
SOCS4	ENSG00000180008.9	suppressor of cytokine signaling 4	protein_coding	-0.67	4.9	2.55121e-10	5.7106e-11	-0.68	1.73632e-14
FBXO33	ENSG00000165355.7	F-box protein 33	protein_coding	-0.67	4.08	8.51923e-11	1.00965e-09	-0.64	3.27574e-12
SAMD5	ENSG00000203727.4	sterile alpha motif domain containing 5	protein_coding	-0.67	4.51	0.000542121	4.08716e-05	-0.44	1.52015e-05
CUEDC1	ENSG00000180891.13	CUE domain containing 1	protein_coding	-0.67	5.18	3.64575e-08	1.4935e-09	-0.63	6.39441e-12
TRMT6	ENSG00000089195.15	tRNA methyltransferase 6	protein_coding	-0.67	4.23	9.09558e-12	3.60744e-10	-0.66	5.35724e-13
PDP1	ENSG00000164951.16	pyruvate dehyrogenase phosphatase catalytic subunit 1	protein_coding	-0.66	5.27	1.74591e-08	7.36256e-10	-0.64	1.89618e-12
PLEKHH1	ENSG00000054690.14	pleckstrin homology, MyTH4 and FERM domain containing H1	protein_coding	-0.66	4.03	0.000122758	5.16043e-07	-0.53	4.97092e-08
TATDN3	ENSG00000203705.11	TatD DNase domain containing 3	protein_coding	-0.66	4.41	1.89318e-14	3.01952e-12	-0.73	3.52371e-17
DNAJC16	ENSG00000116138.13	DnaJ heat shock protein family (Hsp40) member C16	protein_coding	-0.66	5.62	1.59945e-07	9.28366e-06	-0.47	2.35853e-06
SLC49A4	ENSG00000138463.9	solute carrier family 49 member 4	protein_coding	-0.66	4.36	1.06527e-09	1.95564e-09	-0.63	1.00944e-11
MYO5B	ENSG00000167306.20	myosin VB	protein_coding	-0.65	5.96	0.000145715	4.36803e-07	-0.53	3.93749e-08
RGS5	ENSG00000232995.7	regulator of G protein signaling 5 [Source:NCBI gene (formerly Entrezgene)	lncRNA	-0.65	-0.52	2.92437e-06	6.30193e-07	-0.53	6.56076e-08
FERMT2	ENSG00000073712.15	fermitin family member 2	protein_coding	-0.65	6.44	1.63735e-09	3.90612e-09	-0.62	3.17763e-11
MTCH2	ENSG00000109919.10	mitochondrial carrier 2	protein_coding	-0.65	6.88	8.7649e-10	1.69407e-08	-0.59	3.28673e-10
ZDHHC6	ENSG00000023041.11	zinc finger DHHC-type palmitoyltransferase 6	protein_coding	-0.65	5.76	8.7123e-14	5.26135e-11	-0.69	1.47943e-14
ZNF618	ENSG00000157657.14	zinc finger protein 618	protein_coding	-0.64	5.77	1.64679e-08	6.69975e-08	-0.57	2.65138e-09
HSDL2	ENSG00000119471.15	hydroxysteroid dehydrogenase like 2	protein_coding	-0.64	6.86	7.0993e-09	6.65991e-09	-0.61	7.53235e-11
PDCD6IP	ENSG00000170248.15	programmed cell death 6 interacting protein	protein_coding	-0.64	7.36	2.34276e-15	5.62882e-12	-0.72	1.43267e-16
PRKAR2A	ENSG00000114302.16	protein kinase cAMP-dependent type II regulatory subunit alpha	protein_coding	-0.64	6.12	1.23563e-13	7.15805e-12	-0.72	2.45214e-16
CEP70	ENSG00000114107.9	centrosomal protein 70	protein_coding	-0.64	4.58	1.2481e-06	1.89371e-08	-0.59	3.9044e-10
CHCHD4	ENSG00000163528.13	coiled-coil-helix-coiled-coil-helix domain containing 4	protein_coding	-0.64	3.78	3.83236e-14	8.7903e-12	-0.71	3.83341e-16
SDHAF4	ENSG00000154079.6	succinate dehydrogenase complex assembly factor 4	protein_coding	-0.64	3.73	3.40325e-08	1.82549e-08	-0.59	3.68799e-10
TENT5C	ENSG00000183508.5	terminal nucleotidyltransferase 5C	protein_coding	-0.64	4.76	0.00597056	4.8289e-07	-0.53	4.53064e-08
INSIG1	ENSG00000186480.13	insulin induced gene 1	protein_coding	-0.63	5.43	1.37934e-06	4.32627e-06	-0.49	8.77142e-07
ISCU	ENSG00000136003.16	iron-sulfur cluster assembly enzyme	protein_coding	-0.63	7.19	4.5091e-10	6.2093e-11	-0.68	2.04004e-14
SLC25A12	ENSG00000115840.14	solute carrier family 25 member 12	protein_coding	-0.63	4.93	3.21984e-12	2.6735e-12	-0.73	2.65172e-17
NR1D2	ENSG00000174738.13	nuclear receptor subfamily 1 group D member 2	protein_coding	-0.63	5.92	0.000156764	3.3692e-06	-0.49	6.31646e-07
WDR20	ENSG00000140153.18	WD repeat domain 20	protein_coding	-0.63	4.5	1.65286e-14	1.28574e-13	-0.78	9.27764e-21
PSD3	ENSG00000156011.17	pleckstrin and Sec7 domain containing 3	protein_coding	-0.63	3.88	0.00978488	6.51853e-07	-0.52	6.8732e-08
SPA17	ENSG00000064199.7	sperm autoantigenic protein 17	protein_coding	-0.63	2.47	9.5745e-08	8.97825e-09	-0.6	1.21483e-10
ZBTB21	ENSG00000173276.14	zinc finger and BTB domain containing 21	protein_coding	-0.62	5.04	2.07285e-07	1.78957e-07	-0.55	1.11313e-08
SLC25A39	ENSG00000013306.16	solute carrier family 25 member 39	protein_coding	-0.62	7.1	8.11983e-06	1.7594e-08	-0.59	3.48368e-10
YPEL5	ENSG00000119801.13	yippee like 5	protein_coding	-0.62	7.14	1.41246e-14	1.26727e-12	-0.74	4.5092e-18
LRRCC1	ENSG00000133739.16	leucine rich repeat and coiled-coil centrosomal protein 1	protein_coding	-0.62	4.15	2.50466e-08	1.21195e-08	-0.6	1.94958e-10
DPH3	ENSG00000154813.10	diphthamide biosynthesis 3	protein_coding	-0.62	4.94	3.16313e-12	2.50472e-10	-0.66	2.77701e-13
ARFGEF3	ENSG00000112379.9	ARFGEF family member 3	protein_coding	-0.62	5.42	0.00747042	0.0232731	-0.26	0.0213614
ICMT	ENSG00000116237.16	isoprenylcysteine carboxyl methyltransferase	protein_coding	-0.61	6.83	3.76988e-14	6.87356e-12	-0.72	2.24187e-16
PPIF	ENSG00000108179.14	peptidylprolyl isomerase F	protein_coding	-0.61	6.3	1.10969e-05	1.35438e-07	-0.55	7.44666e-09
SMARCE1	ENSG00000073584.20	SWI/SNF related, matrix associated, actin dependent regulator of chromatin, subfamily e, member 1	protein_coding	-0.61	3.29	1.25997e-08	1.67809e-09	-0.63	7.78964e-12
SULT1C2	ENSG00000198203.10	sulfotransferase family 1C member 2	protein_coding	-0.61	5.92	0.00985111	4.74087e-06	-0.48	9.89042e-07
FZD3	ENSG00000104290.11	frizzled class receptor 3	protein_coding	-0.61	3.99	2.77973e-06	2.62001e-07	-0.54	1.91706e-08
SMIM19	ENSG00000176209.12	small integral membrane protein 19	protein_coding	-0.61	4.81	2.16103e-10	8.27785e-10	-0.64	2.32698e-12
PNRC2	ENSG00000189266.13	proline rich nuclear receptor coactivator 2	protein_coding	-0.61	6.46	1.19159e-12	1.99938e-12	-0.74	1.34483e-17
MAP3K21	ENSG00000143674.11	mitogen-activated protein kinase kinase kinase 21	protein_coding	-0.61	5.21	1.05974e-05	1.00022e-06	-0.52	1.23785e-07
MAPK1IP1L	ENSG00000168175.15	mitogen-activated protein kinase 1 interacting protein 1 like	protein_coding	-0.6	6.87	1.71548e-13	1.70315e-11	-0.7	1.55102e-15
GPR160	ENSG00000173890.17	G protein-coupled receptor 160	protein_coding	-0.6	5.62	1.24129e-05	1.8533e-07	-0.55	1.17032e-08
APP	ENSG00000142192.21	amyloid beta precursor protein	protein_coding	-0.6	11.16	1.41875e-07	4.32627e-06	-0.49	8.77142e-07
ALDH3A2	ENSG00000072210.19	aldehyde dehydrogenase 3 family member A2	protein_coding	-0.6	7.71	0.000432088	5.88383e-05	-0.43	2.37578e-05
CHUK	ENSG00000213341.11	component of inhibitor of nuclear factor kappa B kinase complex	protein_coding	-0.6	5.21	3.59807e-12	8.43639e-12	-0.71	3.50723e-16
PPP2R5A	ENSG00000066027.12	protein phosphatase 2 regulatory subunit B'alpha	protein_coding	-0.6	6.29	2.35187e-10	2.50472e-10	-0.66	2.77701e-13
NAPG	ENSG00000134265.13	NSF attachment protein gamma	protein_coding	-0.6	5.22	4.00111e-11	6.10065e-12	-0.72	1.71597e-16
HSPH1	ENSG00000120694.20	heat shock protein family H (Hsp110) member 1	protein_coding	-0.6	6.24	6.26982e-07	4.06717e-10	-0.65	6.64088e-13
NAA50	ENSG00000121579.13	N-alpha-acetyltransferase 50, NatE catalytic subunit	protein_coding	-0.6	6.88	4.3045e-10	6.75265e-11	-0.68	2.39561e-14
MCM8	ENSG00000125885.13	minichromosome maintenance 8 homologous recombination repair factor	protein_coding	-0.6	2.2	5.40618e-06	3.94567e-07	-0.53	3.41534e-08
MBOAT1	ENSG00000172197.11	membrane bound O-acyltransferase domain containing 1	protein_coding	-0.6	3.12	2.42272e-07	2.90341e-07	-0.54	2.21752e-08
MID1IP1	ENSG00000165175.16	MID1 interacting protein 1	protein_coding	-0.59	5.25	1.40811e-06	1.42885e-06	-0.51	2.00995e-07
SLC7A6	ENSG00000103064.15	solute carrier family 7 member 6	protein_coding	-0.59	2.59	2.41688e-05	8.38665e-05	-0.42	3.65629e-05
BTG3	ENSG00000154640.15	BTG anti-proliferation factor 3	protein_coding	-0.59	4.52	1.17229e-05	4.89257e-06	-0.48	1.03016e-06
CAB39	ENSG00000135932.11	calcium binding protein 39	protein_coding	-0.59	7.01	9.68886e-14	1.99938e-12	-0.74	1.34483e-17
DCAF17	ENSG00000115827.14	DDB1 and CUL4 associated factor 17	protein_coding	-0.59	4.44	3.56872e-09	1.53904e-10	-0.67	1.1343e-13
ACTR3B	ENSG00000133627.18	actin related protein 3B	protein_coding	-0.59	2.79	5.18362e-08	1.00498e-08	-0.6	1.452e-10
FOSL2	ENSG00000075426.12	FOS like 2, AP-1 transcription factor subunit	protein_coding	-0.59	8.42	0.000120851	0.000470751	-0.38	0.000282345
SMARCA1	ENSG00000102038.16	SWI/SNF related, matrix associated, actin dependent regulator of chromatin, subfamily a, member 1	protein_coding	-0.58	6.16	6.51309e-07	6.23591e-08	-0.57	2.38368e-09
NEMF	ENSG00000165525.18	nuclear export mediator factor	protein_coding	-0.58	4.79	4.17689e-09	6.41662e-09	-0.61	7.09316e-11
USP24	ENSG00000162402.14	ubiquitin specific peptidase 24	protein_coding	-0.58	6.78	1.31206e-08	2.62001e-07	-0.54	1.91706e-08
RANBP6	ENSG00000137040.10	RAN binding protein 6	protein_coding	-0.58	5.17	1.58619e-09	5.58151e-10	-0.65	1.16649e-12
ELOVL6	ENSG00000170522.10	ELOVL fatty acid elongase 6	protein_coding	-0.58	4.4	0.00157478	0.00198779	-0.34	0.00145938
PEX3	ENSG00000034693.15	peroxisomal biogenesis factor 3	protein_coding	-0.58	4.24	5.09267e-09	9.04264e-11	-0.68	4.17467e-14
MT-ND5	ENSG00000198786.2	mitochondrially encoded NADH:ubiquinone oxidoreductase core subunit 5	protein_coding	-0.58	12.18	0.000162871	0.000216476	-0.4	0.00011369
ECHDC1	ENSG00000093144.19	ethylmalonyl-CoA decarboxylase 1	protein_coding	-0.57	6.1	4.3367e-07	1.21325e-06	-0.51	1.61147e-07
PRKCI	ENSG00000163558.13	protein kinase C iota	protein_coding	-0.57	5.67	5.73101e-08	6.918e-09	-0.61	8.00305e-11
LRP8	ENSG00000157193.18	LDL receptor related protein 8	protein_coding	-0.57	1.94	0.00172335	0.000876678	-0.36	0.000577762
ARFGEF1	ENSG00000066777.9	ADP ribosylation factor guanine nucleotide exchange factor 1	protein_coding	-0.57	6.62	8.18795e-08	1.15354e-10	-0.67	6.63113e-14
RAPH1	ENSG00000173166.18	Ras association (RalGDS/AF-6) and pleckstrin homology domains 1	protein_coding	-0.57	2.77	0.000211563	1.77776e-05	-0.46	5.38884e-06
PNMA1	ENSG00000176903.5	PNMA family member 1	protein_coding	-0.57	6.01	1.07664e-09	8.60543e-10	-0.64	2.48957e-12
SS18L1	ENSG00000184402.15	SS18L1 subunit of BAF chromatin remodeling complex	protein_coding	-0.57	4.08	2.34082e-10	3.48781e-09	-0.62	2.63675e-11
CLASP2	ENSG00000163539.17	cytoplasmic linker associated protein 2	protein_coding	-0.56	5.84	3.72285e-10	8.27785e-10	-0.64	2.32698e-12
HMGCS1	ENSG00000112972.15	3-hydroxy-3-methylglutaryl-CoA synthase 1	protein_coding	-0.56	5.44	2.22764e-08	1.82549e-08	-0.59	3.68799e-10
MIB1	ENSG00000101752.12	mindbomb E3 ubiquitin protein ligase 1	protein_coding	-0.56	6.24	2.56035e-07	1.96653e-08	-0.59	4.1368e-10
CDC25A	ENSG00000164045.12	cell division cycle 25A	protein_coding	-0.56	0.93	0.00180149	1.97179e-06	-0.5	3.09863e-07
HACE1	ENSG00000085382.12	HECT domain and ankyrin repeat containing E3 ubiquitin protein ligase 1	protein_coding	-0.56	4.13	1.53723e-09	5.1576e-10	-0.65	1.01422e-12
ASAH1	ENSG00000104763.20	N-acylsphingosine amidohydrolase 1	protein_coding	-0.56	8.68	1.11196e-05	2.62139e-06	-0.5	4.53124e-07
VTI1B	ENSG00000100568.11	vesicle transport through interaction with t-SNAREs 1B	protein_coding	-0.56	5.82	3.5232e-13	1.07818e-11	-0.71	5.95291e-16
LRRC8B	ENSG00000197147.15	leucine rich repeat containing 8 VRAC subunit B	protein_coding	-0.56	4.04	3.78599e-07	4.36588e-08	-0.57	1.39759e-09
AADAT	ENSG00000109576.14	aminoadipate aminotransferase	protein_coding	-0.56	2.41	1.98907e-05	6.02171e-08	-0.57	2.26242e-09
TPRG1L	ENSG00000158109.15	tumor protein p63 regulated 1 like	protein_coding	-0.56	6.68	8.62036e-08	1.38378e-06	-0.51	1.92454e-07
PLEKHA7	ENSG00000166689.16	pleckstrin homology domain containing A7	protein_coding	-0.56	6.04	0.00013488	5.70973e-06	-0.48	1.2596e-06
PPIP5K1	ENSG00000168781.22	diphosphoinositol pentakisphosphate kinase 1	protein_coding	-0.56	3.71	2.18857e-07	1.95564e-09	-0.63	1.00944e-11
CLHC1	ENSG00000162994.16	clathrin heavy chain linker domain containing 1	protein_coding	-0.56	1.57	1.02094e-05	1.45276e-07	-0.55	8.24126e-09
C11orf45	ENSG00000174370.11	chromosome 11 open reading frame 45	protein_coding	-0.56	1.98	0.00764371	0.0062813	-0.3	0.00521338
TBC1D32	ENSG00000146350.14	TBC1 domain family member 32	protein_coding	-0.56	2.4	3.28232e-06	3.56475e-07	-0.54	2.96125e-08
PIGW	ENSG00000277161.2	phosphatidylinositol glycan anchor biosynthesis class W	protein_coding	-0.56	3.01	9.77701e-08	1.09537e-07	-0.56	5.47388e-09
ZFP36L2	ENSG00000152518.8	ZFP36 ring finger protein like 2	protein_coding	-0.55	6.9	1.14316e-05	2.99332e-05	-0.45	1.03388e-05
MSMO1	ENSG00000052802.13	methylsterol monooxygenase 1	protein_coding	-0.55	5.88	9.18746e-07	2.80512e-07	-0.54	2.11206e-08
EFCAB11	ENSG00000140025.16	EF-hand calcium binding domain 11	protein_coding	-0.55	2.91	2.92764e-12	8.43639e-12	-0.71	3.50723e-16
FMN1	ENSG00000248905.10	formin 1	protein_coding	-0.55	4.99	0.0154979	0.00242239	-0.33	0.00182043
MTRES1	ENSG00000130349.10	mitochondrial transcription rescue factor 1	protein_coding	-0.55	3.95	8.49279e-09	8.97825e-09	-0.6	1.21483e-10
CPT1A	ENSG00000110090.13	carnitine palmitoyltransferase 1A	protein_coding	-0.54	7.47	9.23284e-05	9.56836e-06	-0.47	2.45151e-06
RABGEF1	ENSG00000154710.18	RAB guanine nucleotide exchange factor 1	protein_coding	-0.54	1.16	1.8472e-06	6.02171e-08	-0.57	2.26242e-09
ETNK1	ENSG00000139163.16	ethanolamine kinase 1	protein_coding	-0.54	6.36	1.20047e-08	5.26135e-11	-0.69	1.47943e-14
PGAP1	ENSG00000197121.15	post-GPI attachment to proteins inositol deacylase 1	protein_coding	-0.54	4.53	9.33364e-05	1.21325e-06	-0.51	1.61147e-07
DHRS1	ENSG00000157379.14	dehydrogenase/reductase 1	protein_coding	-0.54	4.58	1.08818e-05	1.21325e-06	-0.51	1.61147e-07
TMEM129	ENSG00000168936.11	transmembrane protein 129, E3 ubiquitin ligase	protein_coding	-0.54	6.15	2.33314e-06	2.19141e-08	-0.59	4.89356e-10
ZC3H14	ENSG00000100722.20	zinc finger CCCH-type containing 14	protein_coding	-0.54	5.5	8.54869e-12	6.58436e-12	-0.72	2.04481e-16
FBXL4	ENSG00000112234.9	F-box and leucine rich repeat protein 4	protein_coding	-0.54	5.57	1.31553e-07	8.27831e-08	-0.56	3.62717e-09
SETD2	ENSG00000181555.21	SET domain containing 2, histone lysine methyltransferase	protein_coding	-0.54	6.3	2.73598e-08	9.20115e-08	-0.56	4.23767e-09
RAB11FIP1	ENSG00000156675.16	RAB11 family interacting protein 1	protein_coding	-0.53	5.79	0.00368256	7.07864e-06	-0.48	1.66336e-06
ARIH2	ENSG00000177479.20	ariadne RBR E3 ubiquitin protein ligase 2	protein_coding	-0.53	5.38	1.67395e-11	3.42079e-12	-0.73	4.68622e-17
FGL2	ENSG00000127951.8	fibrinogen like 2	protein_coding	-0.53	7.44	0.00473813	0.000109688	-0.42	5.0547e-05
NUDT21	ENSG00000167005.14	nudix hydrolase 21	protein_coding	-0.53	6.85	1.96802e-09	5.58151e-10	-0.65	1.16649e-12
BEND3	ENSG00000178409.14	BEN domain containing 3	protein_coding	-0.53	2.14	2.58744e-05	3.10534e-07	-0.54	2.43944e-08
TMEM192	ENSG00000170088.14	transmembrane protein 192	protein_coding	-0.53	6.01	5.00954e-07	2.38876e-06	-0.5	4.00187e-07
PJA1	ENSG00000181191.12	praja ring finger ubiquitin ligase 1	protein_coding	-0.53	5.02	7.17636e-08	7.45027e-09	-0.61	9.01897e-11
FOXO1	ENSG00000150907.10	forkhead box O1	protein_coding	-0.52	5.29	4.76783e-05	5.50048e-09	-0.61	5.54336e-11
HOXC9	ENSG00000180806.5	homeobox C9	protein_coding	-0.52	2.64	0.000104794	0.000106809	-0.42	4.89549e-05
KIAA0232	ENSG00000170871.12	KIAA0232	protein_coding	-0.52	6.49	4.6519e-08	6.69975e-08	-0.57	2.65138e-09
PNPLA8	ENSG00000135241.17	patatin like phospholipase domain containing 8	protein_coding	-0.52	5.8	1.08162e-08	1.03646e-11	-0.71	5.46116e-16
TMTC4	ENSG00000125247.16	transmembrane O-mannosyltransferase targeting cadherins 4	protein_coding	-0.52	4.71	1.3227e-08	1.88044e-09	-0.63	9.45374e-12
ACBD5	ENSG00000107897.20	acyl-CoA binding domain containing 5	protein_coding	-0.52	6.32	7.5446e-08	4.68706e-08	-0.57	1.55564e-09
IP6K1	ENSG00000176095.12	inositol hexakisphosphate kinase 1	protein_coding	-0.52	6.07	1.25468e-10	2.81202e-11	-0.7	4.29924e-15
ZNF610	ENSG00000167554.15	zinc finger protein 610	protein_coding	-0.52	2.23	0.000173938	7.73132e-05	-0.42	3.31302e-05
SMIM6	ENSG00000259120.3	small integral membrane protein 6	protein_coding	-0.52	3.24	0.00467835	0.000180585	-0.4	9.17286e-05
TRAPPC10	ENSG00000160218.13	trafficking protein particle complex 10	protein_coding	-0.51	4.98	8.82834e-08	3.27609e-08	-0.58	9.04548e-10
CUL3	ENSG00000036257.13	cullin 3	protein_coding	-0.51	6.07	7.1885e-10	4.95663e-10	-0.65	9.45284e-13
LANCL1	ENSG00000115365.12	LanC like 1	protein_coding	-0.51	6.76	1.77983e-10	3.46075e-10	-0.66	4.97805e-13
ARL8B	ENSG00000134108.14	ADP ribosylation factor like GTPase 8B	protein_coding	-0.51	6.55	5.22829e-11	4.40268e-10	-0.65	7.65256e-13
BBX	ENSG00000114439.19	BBX high mobility group box domain containing	protein_coding	-0.51	6.83	1.44798e-06	3.68684e-07	-0.54	3.10516e-08
CAPN7	ENSG00000131375.10	calpain 7	protein_coding	-0.51	5.02	2.26939e-09	5.94928e-11	-0.68	1.8805e-14
NIPSNAP3A	ENSG00000136783.10	nipsnap homolog 3A	protein_coding	-0.51	4.93	4.39835e-08	4.40268e-10	-0.65	7.65256e-13
BBS2	ENSG00000125124.13	Bardet-Biedl syndrome 2	protein_coding	-0.51	5.79	7.90521e-13	3.332e-11	-0.69	6.01734e-15
AASDH	ENSG00000157426.14	aminoadipate-semialdehyde dehydrogenase	protein_coding	-0.51	3.8	3.34676e-09	1.00965e-09	-0.64	3.27574e-12
B4GALT6	ENSG00000118276.11	beta-1,4-galactosyltransferase 6	protein_coding	-0.5	3.3	0.00898264	4.68706e-08	-0.57	1.55564e-09
ATP6V1E2	ENSG00000250565.7	ATPase H+ transporting V1 subunit E2	protein_coding	-0.5	2.13	6.35701e-06	2.62139e-06	-0.5	4.53124e-07
SCAI	ENSG00000173611.18	suppressor of cancer cell invasion	protein_coding	-0.5	3.48	1.82465e-05	4.98981e-07	-0.53	4.74388e-08
SNN	ENSG00000184602.6	stannin	protein_coding	-0.5	5.49	7.31077e-09	2.63535e-08	-0.58	6.48935e-10
GCSH	ENSG00000140905.11	glycine cleavage system protein H	protein_coding	-0.5	0.49	0.000908359	0.000708424	-0.37	0.00045261
LMO4	ENSG00000143013.13	LIM domain only 4	protein_coding	-0.5	5.11	1.29436e-05	2.10177e-06	-0.5	3.37477e-07
TMEM260	ENSG00000070269.14	transmembrane protein 260	protein_coding	-0.5	4.24	1.13453e-08	2.44579e-08	-0.58	5.79312e-10
ACAT2	ENSG00000120437.9	acetyl-CoA acetyltransferase 2	protein_coding	-0.49	3.58	1.97117e-07	5.60839e-08	-0.57	2.03461e-09
F2RL1	ENSG00000164251.5	F2R like trypsin receptor 1	protein_coding	-0.49	6.23	0.004495	0.000265557	-0.39	0.000144649
SS18	ENSG00000141380.14	SS18 subunit of BAF chromatin remodeling complex	protein_coding	-0.49	6.48	7.76118e-10	5.58151e-10	-0.65	1.16649e-12
ERLIN2	ENSG00000147475.17	ER lipid raft associated 2	protein_coding	-0.49	7.05	2.81946e-08	1.51786e-08	-0.59	2.76886e-10
IPPK	ENSG00000127080.10	inositol-pentakisphosphate 2-kinase	protein_coding	-0.49	1.82	1.91482e-05	9.86379e-08	-0.56	4.69467e-09
NARS2	ENSG00000137513.10	asparaginyl-tRNA synthetase 2, mitochondrial	protein_coding	-0.49	4.25	7.49605e-08	9.04264e-11	-0.68	4.17467e-14
OSBPL9	ENSG00000117859.19	oxysterol binding protein like 9	protein_coding	-0.49	7.04	5.33914e-11	4.40268e-10	-0.65	7.65256e-13
SMIM14	ENSG00000163683.12	small integral membrane protein 14	protein_coding	-0.49	6.91	1.67837e-07	1.88044e-09	-0.63	9.45374e-12
RANBP2	ENSG00000153201.16	RAN binding protein 2	protein_coding	-0.49	7.18	2.16106e-06	4.98981e-07	-0.53	4.74388e-08
RUNDC1	ENSG00000198863.7	RUN domain containing 1	protein_coding	-0.49	4.88	1.53117e-11	1.02063e-10	-0.68	5.26177e-14
GOLT1A	ENSG00000174567.8	golgi transport 1A	protein_coding	-0.49	2.46	0.0207325	0.000158461	-0.41	7.85318e-05
MPDZ	ENSG00000107186.17	multiple PDZ domain crumbs cell polarity complex component	protein_coding	-0.48	5.76	0.000378391	0.000135549	-0.41	6.51545e-05
RMDN1	ENSG00000176623.12	regulator of microtubule dynamics 1	protein_coding	-0.48	5.74	7.22949e-11	9.80449e-11	-0.68	4.87282e-14
LRRC49	ENSG00000137821.12	leucine rich repeat containing 49	protein_coding	-0.48	3.31	3.28356e-05	1.93964e-05	-0.45	6.01339e-06
CREM	ENSG00000095794.19	cAMP responsive element modulator	protein_coding	-0.48	5.36	0.00137738	2.82793e-05	-0.45	9.63257e-06
TRAF4	ENSG00000076604.15	TNF receptor associated factor 4	protein_coding	-0.48	4.99	3.21301e-05	4.46295e-06	-0.49	9.13549e-07
SPTLC2	ENSG00000100596.7	serine palmitoyltransferase long chain base subunit 2	protein_coding	-0.48	7.22	1.74895e-06	5.04692e-06	-0.48	1.07288e-06
SCYL2	ENSG00000136021.19	SCY1 like pseudokinase 2	protein_coding	-0.48	5.93	2.85855e-08	1.73866e-10	-0.67	1.42207e-13
BAIAP2L1	ENSG00000006453.14	BAR/IMD domain containing adaptor protein 2 like 1	protein_coding	-0.48	3.86	0.0242285	5.20185e-06	-0.48	1.11618e-06
HECTD1	ENSG00000092148.13	HECT domain E3 ubiquitin protein ligase 1	protein_coding	-0.47	7.31	1.6596e-06	6.30193e-07	-0.53	6.56076e-08
VHL	ENSG00000134086.8	von Hippel-Lindau tumor suppressor	protein_coding	-0.47	4.47	4.95858e-06	1.03349e-06	-0.52	1.29437e-07
BAG4	ENSG00000156735.11	BAG cochaperone 4	protein_coding	-0.47	4.93	7.00558e-09	4.95766e-12	-0.72	1.08428e-16
TRMT10C	ENSG00000174173.7	tRNA methyltransferase 10C, mitochondrial RNase P subunit	protein_coding	-0.47	4.34	6.40747e-07	1.42885e-06	-0.51	2.00995e-07
TMEM168	ENSG00000146802.13	transmembrane protein 168	protein_coding	-0.47	5.27	3.15373e-07	2.53733e-08	-0.58	6.12807e-10
BRMS1L	ENSG00000100916.14	BRMS1 like transcriptional repressor	protein_coding	-0.47	3.46	0.00028101	4.71823e-09	-0.61	4.32784e-11
LRRC6	ENSG00000129295.9	leucine rich repeat containing 6	protein_coding	-0.47	3.86	0.000226337	3.58593e-06	-0.49	6.85817e-07
DPY19L4	ENSG00000156162.16	dpy-19 like 4	protein_coding	-0.47	5.54	5.59446e-07	1.38212e-09	-0.63	5.60372e-12
NLK	ENSG00000087095.13	nemo like kinase	protein_coding	-0.46	5.35	1.21529e-07	1.81147e-09	-0.63	8.86912e-12
GSPT1	ENSG00000103342.13	G1 to S phase transition 1	protein_coding	-0.46	7.17	2.18317e-08	1.25868e-08	-0.6	2.06812e-10
NDFIP1	ENSG00000131507.11	Nedd4 family interacting protein 1	protein_coding	-0.46	7.85	5.40397e-10	1.12381e-11	-0.71	6.5004e-16
FAM199X	ENSG00000123575.9	family with sequence similarity 199, X-linked	protein_coding	-0.46	6.45	8.88409e-07	2.44579e-08	-0.58	5.79312e-10
ZNF680	ENSG00000173041.12	zinc finger protein 680	protein_coding	-0.46	3.73	3.65108e-05	5.03624e-08	-0.57	1.7325e-09
MT-ND6	ENSG00000198695.2	mitochondrially encoded NADH:ubiquinone oxidoreductase core subunit 6	protein_coding	-0.46	10.59	0.0052705	0.00306545	-0.33	0.0023656
TSNAX	ENSG00000116918.15	translin associated factor X	protein_coding	-0.45	5.27	5.1284e-08	4.11098e-11	-0.69	9.10405e-15
UBE2W	ENSG00000104343.21	ubiquitin conjugating enzyme E2 W	protein_coding	-0.45	5.47	2.59066e-06	6.29828e-10	-0.65	1.44071e-12
RALGAPB	ENSG00000170471.15	Ral GTPase activating protein non-catalytic subunit beta	protein_coding	-0.45	6.57	1.33838e-08	9.3239e-09	-0.6	1.28961e-10
C22orf39	ENSG00000242259.9	chromosome 22 open reading frame 39	protein_coding	-0.45	4.69	5.93593e-11	1.07818e-11	-0.71	5.95291e-16
PIGK	ENSG00000142892.15	phosphatidylinositol glycan anchor biosynthesis class K	protein_coding	-0.45	6.02	1.26432e-07	8.60543e-10	-0.64	2.48957e-12
GSKIP	ENSG00000100744.15	GSK3B interacting protein	protein_coding	-0.45	4.56	2.14698e-05	4.21906e-07	-0.53	3.75235e-08
ZHX1	ENSG00000165156.15	zinc fingers and homeoboxes 1	protein_coding	-0.44	5.69	8.89601e-06	4.06447e-08	-0.58	1.2545e-09
CD46	ENSG00000117335.20	CD46 molecule	protein_coding	-0.44	8.44	4.82507e-08	6.65991e-09	-0.61	7.53235e-11
SNX4	ENSG00000114520.11	sorting nexin 4	protein_coding	-0.44	5.89	1.47712e-05	3.35542e-05	-0.44	1.19115e-05
LZIC	ENSG00000162441.12	leucine zipper and CTNNBIP1 domain containing	protein_coding	-0.44	5.6	5.9865e-09	1.88044e-09	-0.63	9.45374e-12
COX20	ENSG00000203667.10	cytochrome c oxidase assembly factor COX20	protein_coding	-0.44	-0.62	0.00285123	0.000406221	-0.38	0.000237874
NQO1	ENSG00000181019.13	NAD(P)H quinone dehydrogenase 1	protein_coding	-0.44	5.46	0.00204624	0.000691909	-0.37	0.000440523
SENP8	ENSG00000166192.15	SUMO peptidase family member, NEDD8 specific	protein_coding	-0.43	2.36	1.84042e-05	3.69964e-06	-0.49	7.14495e-07
ENTPD4	ENSG00000197217.13	ectonucleoside triphosphate diphosphohydrolase 4	protein_coding	-0.43	5.2	9.90878e-06	6.02171e-08	-0.57	2.26242e-09
ADD3	ENSG00000148700.15	adducin 3	protein_coding	-0.43	7.52	0.000144395	3.6504e-05	-0.44	1.32229e-05
TEAD3	ENSG00000007866.22	TEA domain transcription factor 3	protein_coding	-0.43	4.29	2.7343e-05	9.56836e-06	-0.47	2.45151e-06
PIP5K1A	ENSG00000143398.20	phosphatidylinositol-4-phosphate 5-kinase type 1 alpha	protein_coding	-0.43	5.7	4.30115e-09	1.33044e-09	-0.63	5.24824e-12
SEPHS1	ENSG00000086475.15	selenophosphate synthetase 1	protein_coding	-0.43	6.05	7.3913e-10	9.41594e-11	-0.68	4.51066e-14
SLC39A6	ENSG00000141424.13	solute carrier family 39 member 6	protein_coding	-0.43	6.66	2.18643e-05	1.49389e-05	-0.46	4.32371e-06
NAA40	ENSG00000110583.13	N-alpha-acetyltransferase 40, NatD catalytic subunit	protein_coding	-0.43	4.43	8.85408e-08	2.73094e-08	-0.58	6.85575e-10
TRMT2B	ENSG00000188917.15	tRNA methyltransferase 2 homolog B	protein_coding	-0.43	4.63	1.91802e-07	9.3239e-09	-0.6	1.28961e-10
PPM1B	ENSG00000138032.21	protein phosphatase, Mg2+/Mn2+ dependent 1B	protein_coding	-0.43	4.5	2.93626e-07	2.28367e-09	-0.63	1.30829e-11
PIGV	ENSG00000060642.11	phosphatidylinositol glycan anchor biosynthesis class V	protein_coding	-0.43	4.72	1.13017e-06	1.67781e-06	-0.51	2.49595e-07
PLPBP	ENSG00000147471.12	pyridoxal phosphate binding protein	protein_coding	-0.43	6.36	2.12876e-08	2.19141e-08	-0.59	4.89356e-10
ARFIP1	ENSG00000164144.16	ADP ribosylation factor interacting protein 1	protein_coding	-0.42	5.6	9.73504e-08	6.55397e-10	-0.65	1.54461e-12
COX10	ENSG00000006695.12	cytochrome c oxidase assembly factor heme A:farnesyltransferase COX10	protein_coding	-0.42	4.19	2.05326e-07	6.69975e-08	-0.57	2.65138e-09
PPP2R1B	ENSG00000137713.16	protein phosphatase 2 scaffold subunit Abeta	protein_coding	-0.42	5.4	4.82069e-06	2.53082e-07	-0.54	1.82527e-08
VAMP7	ENSG00000124333.16	vesicle associated membrane protein 7	protein_coding	-0.42	5.97	1.03941e-08	3.0693e-10	-0.66	4.00865e-13
MGAT4A	ENSG00000071073.13	alpha-1,3-mannosyl-glycoprotein 4-beta-N-acetylglucosaminyltransferase A	protein_coding	-0.42	6.94	0.000287061	2.6706e-05	-0.45	8.96966e-06
NPTN	ENSG00000156642.17	neuroplastin	protein_coding	-0.42	7.31	4.19064e-09	2.47006e-09	-0.62	1.48976e-11
SUCO	ENSG00000094975.14	SUN domain containing ossification factor	protein_coding	-0.42	5.79	1.65682e-05	1.10133e-06	-0.51	1.41237e-07
FAM120C	ENSG00000184083.12	family with sequence similarity 120C	protein_coding	-0.42	4.23	4.09357e-08	7.98942e-08	-0.56	3.44235e-09
TAB3	ENSG00000157625.15	TGF-beta activated kinase 1 (MAP3K7) binding protein 3	protein_coding	-0.42	5.46	4.55333e-07	8.33502e-09	-0.6	1.079e-10
TMEM120B	ENSG00000188735.13	transmembrane protein 120B	protein_coding	-0.42	3.34	1.06537e-05	8.77879e-07	-0.52	1.03527e-07
ZFYVE21	ENSG00000100711.14	zinc finger FYVE-type containing 21	protein_coding	-0.42	4.54	4.54922e-06	3.21529e-07	-0.54	2.56182e-08
TRAK2	ENSG00000115993.13	trafficking kinesin protein 2	protein_coding	-0.42	6.52	1.13621e-07	1.51786e-08	-0.59	2.76886e-10
TMEM117	ENSG00000139173.10	transmembrane protein 117	protein_coding	-0.42	2.38	0.00129196	1.67781e-06	-0.51	2.49595e-07
CD164	ENSG00000135535.17	CD164 molecule	protein_coding	-0.41	8.92	8.31432e-06	1.10133e-06	-0.51	1.41237e-07
TOPORS	ENSG00000197579.8	TOP1 binding arginine/serine rich protein, E3 ubiquitin ligase	protein_coding	-0.41	4.93	9.84168e-06	8.22696e-07	-0.52	9.46744e-08
SCP2	ENSG00000116171.19	sterol carrier protein 2	protein_coding	-0.41	7.73	7.16607e-08	5.8139e-08	-0.57	2.14651e-09
FZD6	ENSG00000164930.12	frizzled class receptor 6	protein_coding	-0.41	5.73	0.000514616	0.000195127	-0.4	0.000100559
DZIP1	ENSG00000134874.18	DAZ interacting zinc finger protein 1	protein_coding	-0.41	5.56	0.00163937	3.45013e-05	-0.44	1.23309e-05
FBXO8	ENSG00000164117.14	F-box protein 8	protein_coding	-0.41	4.88	6.01518e-10	1.96839e-10	-0.66	1.7842e-13
ATG2B	ENSG00000066739.12	autophagy related 2B	protein_coding	-0.41	5.76	1.01355e-05	9.56836e-06	-0.47	2.45151e-06
HINT3	ENSG00000111911.7	histidine triad nucleotide binding protein 3	protein_coding	-0.41	5.54	3.04752e-05	6.09656e-07	-0.53	6.2663e-08
PPP4R2	ENSG00000163605.15	protein phosphatase 4 regulatory subunit 2	protein_coding	-0.41	5.72	7.16767e-06	3.32778e-07	-0.54	2.68875e-08
ATG5	ENSG00000057663.16	autophagy related 5	protein_coding	-0.41	5.15	7.54564e-09	1.05072e-09	-0.64	3.50682e-12
AGPAT2	ENSG00000169692.13	1-acylglycerol-3-phosphate O-acyltransferase 2	protein_coding	-0.41	5.69	0.0112839	7.12316e-05	-0.43	2.99944e-05
BAP1	ENSG00000163930.10	BRCA1 associated protein 1	protein_coding	-0.4	6.15	1.12573e-05	3.51931e-08	-0.58	1.00881e-09
EXTL2	ENSG00000162694.14	exostosin like glycosyltransferase 2	protein_coding	-0.4	4.27	1.41968e-05	9.07312e-07	-0.52	1.08306e-07
PLS1	ENSG00000120756.13	plastin 1	protein_coding	-0.4	5.62	0.0185314	0.000377263	-0.38	0.000218241
HLTF	ENSG00000071794.16	helicase like transcription factor	protein_coding	-0.4	4.81	0.00170659	0.000115604	-0.41	5.38398e-05
METAP2	ENSG00000111142.14	methionyl aminopeptidase 2	protein_coding	-0.4	6.41	4.21457e-05	9.5883e-05	-0.42	4.29897e-05
USP25	ENSG00000155313.15	ubiquitin specific peptidase 25	protein_coding	-0.4	5.9	6.00221e-07	4.21906e-07	-0.53	3.75235e-08
MRPL1	ENSG00000169288.18	mitochondrial ribosomal protein L1	protein_coding	-0.4	4.52	2.60143e-07	1.55847e-07	-0.55	9.11913e-09
FAM168B	ENSG00000152102.18	family with sequence similarity 168 member B	protein_coding	-0.4	7.38	3.04851e-07	3.81436e-07	-0.53	3.25691e-08
CMC1	ENSG00000187118.14	C-X9-C motif containing 1	protein_coding	-0.4	3.83	0.000102644	3.45013e-05	-0.44	1.23309e-05
NGRN	ENSG00000182768.9	neugrin, neurite outgrowth associated	protein_coding	-0.4	4.05	0.00027081	0.00123948	-0.35	0.000856996
TRAPPC6B	ENSG00000182400.15	trafficking protein particle complex 6B	protein_coding	-0.4	2.35	8.32366e-05	1.47582e-06	-0.51	2.09965e-07
ZNF670	ENSG00000277462.2	zinc finger protein 670	protein_coding	-0.4	1.99	0.000198242	4.46295e-06	-0.49	9.13549e-07
FAM122A	ENSG00000187866.10	family with sequence similarity 122A	protein_coding	-0.39	5.11	6.80333e-06	7.20577e-07	-0.52	7.8908e-08
ANXA7	ENSG00000138279.16	annexin A7	protein_coding	-0.39	7.16	1.12444e-08	3.76524e-09	-0.62	2.98939e-11
ORC4	ENSG00000115947.14	origin recognition complex subunit 4	protein_coding	-0.39	5.39	2.36544e-07	2.19653e-09	-0.63	1.2262e-11
GDE1	ENSG00000006007.12	glycerophosphodiester phosphodiesterase 1	protein_coding	-0.39	5.91	4.89218e-06	3.48781e-09	-0.62	2.63675e-11
ZNF823	ENSG00000197933.13	zinc finger protein 823	protein_coding	-0.39	2.84	1.71385e-05	8.49452e-06	-0.47	2.10346e-06
SSX2IP	ENSG00000117155.17	SSX family member 2 interacting protein	protein_coding	-0.39	5.23	0.00217843	8.83887e-05	-0.42	3.89736e-05
ZFP3	ENSG00000180787.6	ZFP3 zinc finger protein	protein_coding	-0.39	3.87	4.62594e-05	2.37776e-05	-0.45	7.76124e-06
TMEM17	ENSG00000186889.10	transmembrane protein 17	protein_coding	-0.39	2.42	0.000574382	8.83887e-05	-0.42	3.89736e-05
KIAA0040	ENSG00000235750.10	KIAA0040	protein_coding	-0.39	6.2	0.000469844	0.000659641	-0.37	0.000416956
RTL10	ENSG00000215012.9	retrotransposon Gag like 10	protein_coding	-0.39	4.01	8.63785e-05	1.14533e-05	-0.47	3.08448e-06
QARS1	ENSG00000172053.18	glutaminyl-tRNA synthetase 1	protein_coding	-0.39	7.19	1.67657e-07	2.11225e-09	-0.63	1.14888e-11
CALM1	ENSG00000198668.13	calmodulin 1	protein_coding	-0.38	8.83	1.07716e-05	3.58593e-06	-0.49	6.85817e-07
GLO1	ENSG00000124767.7	glyoxalase I	protein_coding	-0.38	6.96	1.61882e-05	1.21797e-07	-0.56	6.38627e-09
HSPA4	ENSG00000170606.15	heat shock protein family A (Hsp70) member 4	protein_coding	-0.38	7.24	4.9634e-06	9.67763e-07	-0.52	1.18342e-07
LIFR	ENSG00000113594.10	LIF receptor subunit alpha	protein_coding	-0.38	7.08	0.0257982	0.000939511	-0.36	0.000625307
LAMTOR3	ENSG00000109270.13	late endosomal/lysosomal adaptor, MAPK and MTOR activator 3	protein_coding	-0.38	5.84	7.49028e-09	2.60974e-10	-0.66	2.99069e-13
LRPPRC	ENSG00000138095.19	leucine rich pentatricopeptide repeat containing	protein_coding	-0.38	7.68	6.06083e-05	4.19573e-06	-0.49	8.42454e-07
RNF11	ENSG00000123091.5	ring finger protein 11	protein_coding	-0.38	7.25	1.13585e-06	1.00965e-09	-0.64	3.27574e-12
HP1BP3	ENSG00000127483.19	heterochromatin protein 1 binding protein 3	protein_coding	-0.38	7.49	1.69475e-09	6.2093e-11	-0.68	2.04004e-14
KIAA1191	ENSG00000122203.15	KIAA1191	protein_coding	-0.38	7.96	0.000808177	0.0275355	-0.25	0.0255253
COASY	ENSG00000068120.15	Coenzyme A synthase	protein_coding	-0.38	6.18	3.44807e-05	9.28366e-06	-0.47	2.35853e-06
ZBTB44	ENSG00000196323.14	zinc finger and BTB domain containing 44	protein_coding	-0.38	6.89	3.93083e-05	4.8289e-07	-0.53	4.53064e-08
RLIM	ENSG00000131263.13	ring finger protein, LIM domain interacting	protein_coding	-0.38	6.28	3.21432e-06	2.62139e-06	-0.5	4.53124e-07
MRPS30	ENSG00000112996.11	mitochondrial ribosomal protein S30	protein_coding	-0.38	5.45	3.82188e-07	2.04052e-08	-0.59	4.37847e-10
SNX14	ENSG00000135317.13	sorting nexin 14	protein_coding	-0.38	5.83	2.77974e-06	2.44579e-08	-0.58	5.79312e-10
P4HTM	ENSG00000178467.18	prolyl 4-hydroxylase, transmembrane	protein_coding	-0.38	5.12	3.24783e-05	6.94028e-08	-0.57	2.79411e-09
LDAH	ENSG00000118961.15	lipid droplet associated hydrolase	protein_coding	-0.38	4.55	1.14943e-06	2.03611e-06	-0.5	3.23406e-07
UBA1	ENSG00000130985.17	ubiquitin like modifier activating enzyme 1	protein_coding	-0.37	8.56	0.000864204	5.50048e-09	-0.61	5.54336e-11
UHMK1	ENSG00000152332.16	U2AF homology motif kinase 1	protein_coding	-0.37	7.56	9.48186e-05	7.44585e-08	-0.56	3.10159e-09
LARP4	ENSG00000161813.22	La ribonucleoprotein 4	protein_coding	-0.37	6.03	0.000304735	1.67828e-05	-0.46	5.01027e-06
MLLT1	ENSG00000130382.9	MLLT1 super elongation complex subunit	protein_coding	-0.37	5.92	4.03981e-05	5.26291e-05	-0.43	2.07325e-05
MAP4K2	ENSG00000168067.12	mitogen-activated protein kinase kinase kinase kinase 2	protein_coding	-0.37	4.3	0.000392684	1.21325e-06	-0.51	1.61147e-07
SDF2	ENSG00000132581.10	stromal cell derived factor 2	protein_coding	-0.37	5.25	1.48588e-07	2.13151e-07	-0.55	1.42886e-08
RBM12	ENSG00000244462.8	RNA binding motif protein 12	protein_coding	-0.37	6.25	1.04054e-05	1.88473e-05	-0.46	5.80005e-06
GLCE	ENSG00000138604.10	glucuronic acid epimerase	protein_coding	-0.37	5.57	0.00129689	0.000572155	-0.37	0.000353814
VPS36	ENSG00000136100.14	vacuolar protein sorting 36 homolog	protein_coding	-0.37	6.09	2.01012e-06	1.95564e-09	-0.63	1.00944e-11
BCCIP	ENSG00000107949.17	BRCA2 and CDKN1A interacting protein	protein_coding	-0.37	5.54	1.09638e-07	1.66928e-07	-0.55	1.0072e-08
ERCC6L2	ENSG00000182150.18	ERCC excision repair 6 like 2	protein_coding	-0.37	4.75	0.000260455	1.0166e-05	-0.47	2.64871e-06
TMEM139	ENSG00000178826.11	transmembrane protein 139	protein_coding	-0.37	3.91	0.0195305	0.00275677	-0.33	0.00210248
SPPL2A	ENSG00000138600.10	signal peptide peptidase like 2A	protein_coding	-0.37	6.44	2.42883e-05	2.70575e-06	-0.5	4.72516e-07
C2orf69	ENSG00000178074.6	chromosome 2 open reading frame 69	protein_coding	-0.37	4.33	0.000105263	5.71554e-09	-0.61	5.89573e-11
TMEM160	ENSG00000130748.7	transmembrane protein 160	protein_coding	-0.37	2.04	0.0399628	0.00300042	-0.33	0.00231026
TJP1	ENSG00000104067.17	tight junction protein 1	protein_coding	-0.36	7.12	0.00181479	0.000614104	-0.37	0.000383965
HDAC4	ENSG00000068024.17	histone deacetylase 4	protein_coding	-0.36	4.04	0.00113343	0.000103986	-0.42	4.74023e-05
BPGM	ENSG00000172331.12	bisphosphoglycerate mutase	protein_coding	-0.36	5.34	0.00122236	1.90944e-06	-0.5	2.96829e-07
IL1R1	ENSG00000115594.12	interleukin 1 receptor type 1	protein_coding	-0.36	6.51	0.00776642	0.00115682	-0.35	0.000792334
MNAT1	ENSG00000020426.11	MNAT1 component of CDK activating kinase	protein_coding	-0.36	3.19	9.82758e-06	4.5167e-07	-0.53	4.12643e-08
PRKACB	ENSG00000142875.19	protein kinase cAMP-activated catalytic subunit beta	protein_coding	-0.36	6.38	6.70144e-05	8.88333e-08	-0.56	4.02414e-09
CTR9	ENSG00000198730.9	CTR9 homolog, Paf1/RNA polymerase II complex component	protein_coding	-0.36	6.23	2.24996e-06	4.5167e-07	-0.53	4.12643e-08
SECISBP2L	ENSG00000138593.9	SECIS binding protein 2 like	protein_coding	-0.36	6.88	0.000227279	1.13785e-06	-0.51	1.47646e-07
SLC39A3	ENSG00000141873.11	solute carrier family 39 member 3	protein_coding	-0.36	3.12	0.00815859	0.00275677	-0.33	0.00210248
LIMA1	ENSG00000050405.13	LIM domain and actin binding 1	protein_coding	-0.36	6.94	0.00221758	0.0015906	-0.35	0.00113594
THAP10	ENSG00000129028.9	THAP domain containing 10	protein_coding	-0.36	2.18	0.000663769	1.53741e-05	-0.46	4.48454e-06
LIN7B	ENSG00000104863.12	lin-7 homolog B, crumbs cell polarity complex component	protein_coding	-0.36	0.77	0.0143953	0.000586057	-0.37	0.000363737
ZBTB10	ENSG00000205189.12	zinc finger and BTB domain containing 10	protein_coding	-0.36	5.77	0.000722264	2.31061e-05	-0.45	7.48707e-06
ATF7IP2	ENSG00000166669.13	activating transcription factor 7 interacting protein 2	protein_coding	-0.36	2.93	0.00241411	0.000228087	-0.4	0.000120898
RAB11B	ENSG00000185236.12	RAB11B, member RAS oncogene family	protein_coding	-0.36	6.55	0.000234816	1.77776e-05	-0.46	5.38884e-06
RBM18	ENSG00000119446.14	RNA binding motif protein 18	protein_coding	-0.36	5.3	1.18315e-05	1.7594e-08	-0.59	3.48368e-10
PPIL4	ENSG00000131013.4	peptidylprolyl isomerase like 4	protein_coding	-0.36	4.89	0.000165539	3.26291e-05	-0.44	1.15047e-05
PJVK	ENSG00000204311.15	pejvakin	protein_coding	-0.36	0.65	0.00467516	0.000112587	-0.41	5.21548e-05
MITF	ENSG00000187098.17	melanocyte inducing transcription factor	protein_coding	-0.35	6.03	0.0035376	0.000233817	-0.4	0.000124517
COMT	ENSG00000093010.15	catechol-O-methyltransferase	protein_coding	-0.35	6.43	0.00321586	0.000518936	-0.38	0.000316095
HCCS	ENSG00000004961.15	holocytochrome c synthase	protein_coding	-0.35	4.75	6.85431e-06	6.65991e-09	-0.61	7.53235e-11
UBA3	ENSG00000144744.17	ubiquitin like modifier activating enzyme 3	protein_coding	-0.35	5.1	1.7035e-05	5.33616e-07	-0.53	5.20806e-08
LCOR	ENSG00000196233.14	ligand dependent nuclear receptor corepressor	protein_coding	-0.35	5.53	0.0002973	1.14533e-05	-0.47	3.08448e-06
NAA30	ENSG00000139977.14	N-alpha-acetyltransferase 30, NatC catalytic subunit	protein_coding	-0.35	5.05	2.39984e-05	1.62499e-06	-0.51	2.39068e-07
CHAMP1	ENSG00000198824.7	chromosome alignment maintaining phosphoprotein 1	protein_coding	-0.35	4.72	0.000121807	2.05756e-05	-0.45	6.47515e-06
STON1	ENSG00000243244.7	stonin 1	protein_coding	-0.35	4.75	0.0294493	0.000367946	-0.38	0.000211973
CDR2L	ENSG00000109089.7	cerebellar degeneration related protein 2 like	protein_coding	-0.35	4.46	0.0184299	0.000367946	-0.38	0.000211973
NCBP1	ENSG00000136937.13	nuclear cap binding protein subunit 1	protein_coding	-0.34	5.22	9.93516e-05	8.75344e-06	-0.47	2.18584e-06
C1D	ENSG00000197223.12	C1D nuclear receptor corepressor	protein_coding	-0.34	4.27	1.25562e-05	5.89562e-07	-0.53	5.98239e-08
KBTBD6	ENSG00000165572.8	kelch repeat and BTB domain containing 6	protein_coding	-0.34	4.28	0.000338537	1.93964e-05	-0.45	6.01339e-06
RABL3	ENSG00000144840.10	RAB, member of RAS oncogene family like 3	protein_coding	-0.34	5.19	3.66701e-05	3.94567e-07	-0.53	3.41534e-08
PGAM5	ENSG00000247077.7	PGAM family member 5, mitochondrial serine/threonine protein phosphatase	protein_coding	-0.34	5.01	0.000359179	5.72284e-05	-0.43	2.29667e-05
TAF13	ENSG00000197780.10	TATA-box binding protein associated factor 13	protein_coding	-0.34	4.55	6.88684e-05	2.16651e-06	-0.5	3.5161e-07
TRAPPC8	ENSG00000153339.15	trafficking protein particle complex 8	protein_coding	-0.34	5.87	3.78608e-05	8.22696e-07	-0.52	9.46744e-08
MFN1	ENSG00000171109.19	mitofusin 1	protein_coding	-0.34	5.3	8.27423e-06	8.22696e-07	-0.52	9.46744e-08
TCEAL9	ENSG00000185222.10	transcription elongation factor A like 9	protein_coding	-0.34	6.03	0.00333105	5.41246e-05	-0.43	2.14529e-05
MTERF2	ENSG00000120832.10	mitochondrial transcription termination factor 2	protein_coding	-0.34	3.19	0.00109784	1.32682e-05	-0.46	3.72065e-06
UBQLN1	ENSG00000135018.14	ubiquilin 1	protein_coding	-0.33	7.14	3.50054e-05	1.91972e-07	-0.55	1.23063e-08
CRYZ	ENSG00000116791.14	crystallin zeta	protein_coding	-0.33	8.02	0.0132529	0.000708424	-0.37	0.00045261
LRPAP1	ENSG00000163956.13	LDL receptor related protein associated protein 1	protein_coding	-0.33	7.5	0.00121566	0.000162608	-0.41	8.09894e-05
GBF1	ENSG00000107862.6	golgi brefeldin A resistant guanine nucleotide exchange factor 1	protein_coding	-0.33	6.72	0.000103842	1.40804e-05	-0.46	4.01129e-06
PTCD3	ENSG00000132300.19	pentatricopeptide repeat domain 3	protein_coding	-0.33	5.8	4.43749e-07	3.46075e-10	-0.66	4.97805e-13
RPRD1A	ENSG00000141425.18	regulation of nuclear pre-mRNA domain containing 1A	protein_coding	-0.33	5.96	5.13284e-05	1.66928e-07	-0.55	1.0072e-08
IMPACT	ENSG00000154059.11	impact RWD domain protein	protein_coding	-0.33	5.61	5.70632e-05	2.05877e-07	-0.55	1.35978e-08
G2E3	ENSG00000092140.16	G2/M-phase specific E3 ubiquitin protein ligase	protein_coding	-0.33	4.01	0.000814446	0.000109688	-0.42	5.0547e-05
NHLRC2	ENSG00000196865.4	NHL repeat containing 2	protein_coding	-0.33	5.65	0.000276686	1.09537e-07	-0.56	5.47388e-09
TOMM5	ENSG00000175768.13	translocase of outer mitochondrial membrane 5	protein_coding	-0.33	-0.22	0.0060953	0.00021096	-0.4	0.000110259
RAD51B	ENSG00000182185.18	RAD51 paralog B	protein_coding	-0.33	2.25	0.00137878	1.36679e-05	-0.46	3.86338e-06
PPP2R5E	ENSG00000154001.14	protein phosphatase 2 regulatory subunit B'epsilon	protein_coding	-0.33	5.67	6.77706e-05	8.49371e-07	-0.52	9.89389e-08
TMEM254	ENSG00000133678.14	transmembrane protein 254	protein_coding	-0.33	4.21	3.88984e-06	1.10133e-06	-0.51	1.41237e-07
SNU13	ENSG00000100138.15	small nuclear ribonucleoprotein 13	protein_coding	-0.33	6.69	5.01675e-06	1.21325e-06	-0.51	1.61147e-07
TMEM267	ENSG00000151881.15	transmembrane protein 267	protein_coding	-0.33	3.79	0.00112759	1.58344e-05	-0.46	4.65482e-06
PRKAR1A	ENSG00000108946.15	protein kinase cAMP-dependent type I regulatory subunit alpha	protein_coding	-0.32	8.51	3.62047e-05	3.11415e-09	-0.62	2.18568e-11
G3BP2	ENSG00000138757.15	G3BP stress granule assembly factor 2	protein_coding	-0.32	7.53	0.000106506	2.37776e-05	-0.45	7.76124e-06
SPTLC1	ENSG00000090054.15	serine palmitoyltransferase long chain base subunit 1	protein_coding	-0.32	6.48	5.03217e-05	1.29559e-06	-0.51	1.7609e-07
ENPP4	ENSG00000001561.7	ectonucleotide pyrophosphatase/phosphodiesterase 4	protein_coding	-0.32	5.92	0.0157435	0.0019007	-0.34	0.00138788
MRPL50	ENSG00000136897.8	mitochondrial ribosomal protein L50	protein_coding	-0.32	4.81	0.000341461	1.49389e-05	-0.46	4.32371e-06
FASTKD1	ENSG00000138399.18	FAST kinase domains 1	protein_coding	-0.32	4.12	0.00256393	4.21906e-07	-0.53	3.75235e-08
ZNF678	ENSG00000181450.18	zinc finger protein 678	protein_coding	-0.32	3.22	0.00373821	0.000333109	-0.39	0.000188711
SELENOI	ENSG00000138018.18	selenoprotein I	protein_coding	-0.32	5.54	0.000390922	9.08877e-05	-0.42	4.0295e-05
STMN1	ENSG00000117632.23	stathmin 1	protein_coding	-0.31	6.07	0.0146957	0.00155536	-0.35	0.00110768
FMR1	ENSG00000102081.15	FMRP translational regulator 1	protein_coding	-0.31	6.15	0.000112052	4.19573e-06	-0.49	8.42454e-07
EIF5	ENSG00000100664.11	eukaryotic translation initiation factor 5	protein_coding	-0.31	7.48	0.000675482	0.000293581	-0.39	0.000162765
DNAJB1	ENSG00000132002.9	DnaJ heat shock protein family (Hsp40) member B1	protein_coding	-0.31	7.06	0.00354083	0.00640663	-0.3	0.00532653
MAPK8	ENSG00000107643.16	mitogen-activated protein kinase 8	protein_coding	-0.31	5.13	0.000113113	5.53318e-06	-0.48	1.20936e-06
RPE	ENSG00000197713.15	ribulose-5-phosphate-3-epimerase	protein_coding	-0.31	5.18	7.80835e-06	3.06667e-06	-0.49	5.57928e-07
ATXN7	ENSG00000163635.20	ataxin 7	protein_coding	-0.31	5.08	0.000196225	3.45013e-05	-0.44	1.23309e-05
TP53I3	ENSG00000115129.14	tumor protein p53 inducible protein 3	protein_coding	-0.31	4.79	0.0356182	0.0114	-0.28	0.00995476
RRAS2	ENSG00000133818.14	RAS related 2	protein_coding	-0.31	4.9	0.00308765	0.000286247	-0.39	0.000158005
APPL1	ENSG00000157500.12	adaptor protein, phosphotyrosine interacting with PH domain and leucine zipper 1	protein_coding	-0.31	6.03	0.000598133	1.04805e-05	-0.47	2.75325e-06
FAM76A	ENSG00000009780.16	family with sequence similarity 76 member A	protein_coding	-0.31	3.85	0.000476683	2.44609e-07	-0.54	1.73878e-08
SCYL3	ENSG00000000457.14	SCY1 like pseudokinase 3	protein_coding	-0.31	3.65	2.95927e-06	4.5167e-07	-0.53	4.12643e-08
SHPRH	ENSG00000146414.16	SNF2 histone linker PHD RING helicase	protein_coding	-0.31	3.89	0.0217127	0.0309487	-0.25	0.0287691
CLCN3	ENSG00000109572.14	chloride voltage-gated channel 3	protein_coding	-0.3	7.26	0.00230163	0.000448157	-0.38	0.000266668
AK2	ENSG00000004455.17	adenylate kinase 2	protein_coding	-0.3	7.33	2.8831e-05	4.08716e-05	-0.44	1.52015e-05
KIF5B	ENSG00000170759.11	kinesin family member 5B	protein_coding	-0.3	7.51	0.000216437	2.99332e-05	-0.45	1.03388e-05
OPA1	ENSG00000198836.11	OPA1 mitochondrial dynamin like GTPase	protein_coding	-0.3	6.37	6.87723e-05	1.47582e-06	-0.51	2.09965e-07
PEX13	ENSG00000162928.9	peroxisomal biogenesis factor 13	protein_coding	-0.3	5.04	3.1468e-06	3.78232e-08	-0.58	1.12522e-09
ZNF35	ENSG00000169981.11	zinc finger protein 35	protein_coding	-0.3	2.53	0.000286021	3.86109e-05	-0.44	1.41731e-05
TMEM97	ENSG00000109084.14	transmembrane protein 97	protein_coding	-0.3	4.05	0.0268277	0.0472511	-0.23	0.0450523
NUCKS1	ENSG00000069275.13	nuclear casein kinase and cyclin dependent kinase substrate 1	protein_coding	-0.3	8.58	2.33974e-05	1.42885e-06	-0.51	2.00995e-07
ZNF426	ENSG00000130818.12	zinc finger protein 426	protein_coding	-0.3	4.28	0.0103867	0.00362517	-0.32	0.00284929
TMEM231	ENSG00000205084.11	transmembrane protein 231	protein_coding	-0.3	3.51	0.00252022	0.000300962	-0.39	0.000167597
SHTN1	ENSG00000187164.20	shootin 1	protein_coding	-0.3	5.57	0.00952307	0.00110555	-0.36	0.000752643
TOGARAM1	ENSG00000198718.13	TOG array regulator of axonemal microtubules 1	protein_coding	-0.3	4.68	0.00157413	0.000691909	-0.37	0.000440523
PPP1R2	ENSG00000184203.8	protein phosphatase 1 regulatory inhibitor subunit 2	protein_coding	-0.29	5.93	0.000266662	5.89562e-07	-0.53	5.98239e-08
CAMTA1	ENSG00000171735.19	calmodulin binding transcription activator 1	protein_coding	-0.29	5.25	0.000146215	1.77776e-05	-0.46	5.38884e-06
HIPK3	ENSG00000110422.12	homeodomain interacting protein kinase 3	protein_coding	-0.29	7.47	0.000271856	1.11201e-05	-0.47	2.97e-06
CUL5	ENSG00000166266.14	cullin 5	protein_coding	-0.29	5.61	0.00203701	1.14533e-05	-0.47	3.08448e-06
BCAS2	ENSG00000116752.6	BCAS2 pre-mRNA processing factor	protein_coding	-0.29	5.09	1.12489e-05	6.46467e-08	-0.57	2.51463e-09
IPO8	ENSG00000133704.10	importin 8	protein_coding	-0.29	6.41	1.20361e-05	2.46227e-06	-0.5	4.16807e-07
RYBP	ENSG00000163602.11	RING1 and YY1 binding protein	protein_coding	-0.29	6.08	0.000207232	2.24509e-05	-0.45	7.22271e-06
IFT88	ENSG00000032742.18	intraflagellar transport 88	protein_coding	-0.29	4.9	0.000714399	2.99332e-05	-0.45	1.03388e-05
SEPTIN11	ENSG00000138758.12	septin 11	protein_coding	-0.29	7.74	0.000301405	3.07931e-05	-0.44	1.07095e-05
SYPL1	ENSG00000008282.9	synaptophysin like 1	protein_coding	-0.28	7.61	0.00071169	3.58593e-06	-0.49	6.85817e-07
SGPL1	ENSG00000166224.17	sphingosine-1-phosphate lyase 1	protein_coding	-0.28	6.77	0.00357798	0.00569193	-0.31	0.00468006
UBE2K	ENSG00000078140.14	ubiquitin conjugating enzyme E2 K	protein_coding	-0.28	6.45	3.63565e-05	1.12495e-08	-0.6	1.73403e-10
TRIM37	ENSG00000108395.14	tripartite motif containing 37	protein_coding	-0.28	4.54	0.000357455	1.63065e-05	-0.46	4.83033e-06
NFYB	ENSG00000120837.8	nuclear transcription factor Y subunit beta	protein_coding	-0.28	5.09	0.00274483	0.000644107	-0.37	0.000405642
PDPK1	ENSG00000140992.19	3-phosphoinositide dependent protein kinase 1	protein_coding	-0.28	5.42	0.000232567	0.000128577	-0.41	6.11598e-05
SNX2	ENSG00000205302.7	sorting nexin 2	protein_coding	-0.28	6.96	0.00338725	0.000614104	-0.37	0.000383965
UBTF	ENSG00000108312.15	upstream binding transcription factor	protein_coding	-0.28	6.9	0.000396539	0.000128577	-0.41	6.11598e-05
MTMR4	ENSG00000108389.9	myotubularin related protein 4	protein_coding	-0.28	5.71	0.0283508	0.000761487	-0.37	0.000491652
HNRNPR	ENSG00000125944.21	heterogeneous nuclear ribonucleoprotein R	protein_coding	-0.28	6.93	0.000216572	6.20661e-05	-0.43	2.53674e-05
SUPT16H	ENSG00000092201.10	SPT16 homolog, facilitates chromatin remodeling subunit	protein_coding	-0.28	6.74	0.00090854	0.00173855	-0.34	0.00125533
CA5B	ENSG00000169239.13	carbonic anhydrase 5B	protein_coding	-0.28	3.39	0.00682928	0.00640663	-0.3	0.00532653
STK38L	ENSG00000211455.8	serine/threonine kinase 38 like	protein_coding	-0.28	5.39	0.0100985	0.00706653	-0.3	0.00592759
ABCA5	ENSG00000154265.16	ATP binding cassette subfamily A member 5	protein_coding	-0.28	4.82	0.0234745	0.00410455	-0.32	0.00326836
KPNA6	ENSG00000025800.14	karyopherin subunit alpha 6	protein_coding	-0.28	6.45	0.000151836	8.83887e-05	-0.42	3.89736e-05
SPATA6	ENSG00000132122.12	spermatogenesis associated 6	protein_coding	-0.28	4.24	0.0018794	3.97175e-05	-0.44	1.46757e-05
TM9SF3	ENSG00000077147.16	transmembrane 9 superfamily member 3	protein_coding	-0.28	8.09	0.00083418	1.79059e-06	-0.5	2.7234e-07
MMS19	ENSG00000155229.21	MMS19 homolog, cytosolic iron-sulfur assembly component	protein_coding	-0.28	5.88	0.00190143	0.017352	-0.27	0.0156241
ZBTB37	ENSG00000185278.15	zinc finger and BTB domain containing 37	protein_coding	-0.28	4.38	0.00350994	0.00138971	-0.35	0.000975348
NAPA	ENSG00000105402.8	NSF attachment protein alpha	protein_coding	-0.28	5.5	0.000246811	6.09656e-07	-0.53	6.2663e-08
RAB18	ENSG00000099246.17	RAB18, member RAS oncogene family	protein_coding	-0.28	6.72	5.95179e-05	2.44579e-08	-0.58	5.79312e-10
ARL6	ENSG00000113966.10	ADP ribosylation factor like GTPase 6	protein_coding	-0.28	4.09	0.0315653	2.28312e-07	-0.54	1.57625e-08
AP5B1	ENSG00000254470.3	adaptor related protein complex 5 subunit beta 1	protein_coding	-0.28	5.17	0.00315564	0.000135549	-0.41	6.51545e-05
GPD2	ENSG00000115159.16	glycerol-3-phosphate dehydrogenase 2	protein_coding	-0.27	5.63	0.0173473	0.0150401	-0.27	0.0134064
HBS1L	ENSG00000112339.15	HBS1 like translational GTPase	protein_coding	-0.27	5.46	0.000460088	0.000109688	-0.42	5.0547e-05
TPGS2	ENSG00000134779.15	tubulin polyglutamylase complex subunit 2	protein_coding	-0.27	5.93	0.000752069	0.0019007	-0.34	0.00138788
PNPT1	ENSG00000138035.15	polyribonucleotide nucleotidyltransferase 1	protein_coding	-0.27	4.69	9.25989e-05	1.52346e-06	-0.51	2.19197e-07
FAM98B	ENSG00000171262.11	family with sequence similarity 98 member B	protein_coding	-0.27	5.37	0.00114424	3.69964e-06	-0.49	7.14495e-07
ZNF112	ENSG00000062370.17	zinc finger protein 112	protein_coding	-0.27	2.41	0.0138059	0.00287536	-0.33	0.00220349
HNRNPLL	ENSG00000143889.16	heterogeneous nuclear ribonucleoprotein L like	protein_coding	-0.27	5.15	0.000761998	0.000150387	-0.41	7.37791e-05
TRAPPC9	ENSG00000167632.18	trafficking protein particle complex 9	protein_coding	-0.27	5.7	0.0028224	0.000175859	-0.4	8.88938e-05
MDH2	ENSG00000146701.12	malate dehydrogenase 2	protein_coding	-0.27	7.65	0.00591264	0.000222243	-0.4	0.000117256
KIF3A	ENSG00000131437.16	kinesin family member 3A	protein_coding	-0.27	4.5	0.00629629	0.000482631	-0.38	0.00029058
BCDIN3D	ENSG00000186666.6	BCDIN3 domain containing RNA methyltransferase	protein_coding	-0.27	1.87	0.000417516	1.62499e-06	-0.51	2.39068e-07
CMTR2	ENSG00000180917.18	cap methyltransferase 2	protein_coding	-0.27	4.96	0.00203098	0.000279146	-0.39	0.000153397
HSF2	ENSG00000025156.13	heat shock transcription factor 2	protein_coding	-0.26	3.44	0.00343093	0.00025879	-0.39	0.000140334
MKLN1	ENSG00000128585.18	muskelin 1	protein_coding	-0.26	6	0.0132479	0.00132668	-0.35	0.000925643
RAB5B	ENSG00000111540.16	RAB5B, member RAS oncogene family	protein_coding	-0.26	7.78	8.80036e-10	2.30964e-10	-0.66	2.39586e-13
GCFC2	ENSG00000005436.14	GC-rich sequence DNA-binding factor 2	protein_coding	-0.26	4.37	0.00288287	5.88534e-06	-0.48	1.31028e-06
TMF1	ENSG00000144747.17	TATA element modulatory factor 1	protein_coding	-0.26	5.5	0.00227586	9.08877e-05	-0.42	4.0295e-05
BCLAF1	ENSG00000029363.17	BCL2 associated transcription factor 1	protein_coding	-0.26	6.9	0.00513829	0.000300962	-0.39	0.000167597
CCDC28A	ENSG00000024862.18	coiled-coil domain containing 28A	protein_coding	-0.26	5.35	0.000684679	0.000200355	-0.4	0.000103747
BRPF3	ENSG00000096070.19	bromodomain and PHD finger containing 3	protein_coding	-0.26	6.11	0.01729	0.00843137	-0.29	0.00718277
CHD7	ENSG00000171316.12	chromodomain helicase DNA binding protein 7	protein_coding	-0.26	4.55	0.0075739	0.00221834	-0.34	0.00165006
ASH1L	ENSG00000116539.14	ASH1 like histone lysine methyltransferase	protein_coding	-0.26	6.72	0.0163558	0.0213529	-0.26	0.0194942
GRPEL1	ENSG00000109519.13	GrpE like 1, mitochondrial	protein_coding	-0.26	5.59	0.000294203	0.000300962	-0.39	0.000167597
ZNF30	ENSG00000168661.15	zinc finger protein 30	protein_coding	-0.26	1.69	0.00844294	0.000205547	-0.4	0.000106941
DPY19L3	ENSG00000178904.19	dpy-19 like C-mannosyltransferase 3	protein_coding	-0.26	4.96	0.000794889	6.74075e-05	-0.43	2.80481e-05
ABHD13	ENSG00000139826.6	abhydrolase domain containing 13	protein_coding	-0.26	4.57	0.00879534	0.000171328	-0.4	8.61801e-05
ARHGAP35	ENSG00000160007.19	Rho GTPase activating protein 35	protein_coding	-0.25	7.24	0.01278	0.0120626	-0.28	0.0105789
TAX1BP1	ENSG00000106052.13	Tax1 binding protein 1	protein_coding	-0.25	7.45	0.0036316	3.32778e-07	-0.54	2.68875e-08
ARMC8	ENSG00000114098.18	armadillo repeat containing 8	protein_coding	-0.25	5.43	0.000125796	2.03611e-06	-0.5	3.23406e-07
CXXC5	ENSG00000171604.12	CXXC finger protein 5	protein_coding	-0.25	7.06	0.0203679	0.00525215	-0.31	0.00428602
DPP8	ENSG00000074603.19	dipeptidyl peptidase 8	protein_coding	-0.25	5.94	0.00594362	0.00012522	-0.41	5.92564e-05
DDX28	ENSG00000182810.7	DEAD-box helicase 28	protein_coding	-0.25	3.73	0.0122501	0.00402298	-0.32	0.00319622
GOLPH3	ENSG00000113384.14	golgi phosphoprotein 3	protein_coding	-0.25	6.86	9.72358e-06	8.22696e-07	-0.52	9.46744e-08
KBTBD3	ENSG00000182359.15	kelch repeat and BTB domain containing 3	protein_coding	-0.25	3.35	0.0278527	0.00177784	-0.34	0.00128757
PDIK1L	ENSG00000175087.10	PDLIM1 interacting kinase 1 like	protein_coding	-0.24	3.8	0.0226694	0.000333109	-0.39	0.000188711
PCGF5	ENSG00000180628.15	polycomb group ring finger 5	protein_coding	-0.24	6.91	0.0121338	0.000200355	-0.4	0.000103747
ATP2B1	ENSG00000070961.16	ATPase plasma membrane Ca2+ transporting 1	protein_coding	-0.24	5.84	0.0143371	0.00312955	-0.33	0.00241856
CHM	ENSG00000188419.14	CHM Rab escort protein	protein_coding	-0.24	5.42	0.00625596	0.00252858	-0.33	0.00190975
DLG1	ENSG00000075711.21	discs large MAGUK scaffold protein 1	protein_coding	-0.24	6.34	0.00435864	4.60057e-06	-0.49	9.50726e-07
PPP1CB	ENSG00000213639.10	protein phosphatase 1 catalytic subunit beta	protein_coding	-0.24	8.13	0.0179829	0.0248913	-0.26	0.02294
RAB11A	ENSG00000103769.10	RAB11A, member RAS oncogene family	protein_coding	-0.24	7.41	0.000391937	0.000233817	-0.4	0.000124517
ARMCX3	ENSG00000102401.20	armadillo repeat containing X-linked 3	protein_coding	-0.24	6.4	0.0016774	1.99768e-05	-0.45	6.24023e-06
ZRANB1	ENSG00000019995.6	zinc finger RANBP2-type containing 1	protein_coding	-0.24	3.95	0.011414	0.00281574	-0.33	0.00215277
NDC1	ENSG00000058804.12	NDC1 transmembrane nucleoporin	protein_coding	-0.24	4.67	0.00743742	0.00720797	-0.3	0.00605846
ZC3H15	ENSG00000065548.18	zinc finger CCCH-type containing 15	protein_coding	-0.24	5.96	0.00018351	1.28868e-05	-0.46	3.58484e-06
GATAD2B	ENSG00000143614.10	GATA zinc finger domain containing 2B	protein_coding	-0.24	5.4	0.00390483	0.00177784	-0.34	0.00128757
FIP1L1	ENSG00000145216.16	factor interacting with PAPOLA and CPSF1	protein_coding	-0.24	3.66	0.000213615	7.32143e-05	-0.42	3.10107e-05
ARL14EP	ENSG00000152219.5	ADP ribosylation factor like GTPase 14 effector protein	protein_coding	-0.24	4.84	0.000642957	1.57343e-06	-0.51	2.2894e-07
SH3D19	ENSG00000109686.19	SH3 domain containing 19	protein_coding	-0.24	6.26	0.0336225	0.0334377	-0.24	0.0313289
UEVLD	ENSG00000151116.17	UEV and lactate/malate dehyrogenase domains	protein_coding	-0.24	5.02	0.0022873	6.06793e-06	-0.48	1.36316e-06
AP5S1	ENSG00000125843.11	adaptor related protein complex 5 subunit sigma 1	protein_coding	-0.24	3.8	0.00327085	0.000150387	-0.41	7.37791e-05
MTRF1	ENSG00000120662.16	mitochondrial translation release factor 1	protein_coding	-0.24	2.96	0.00731821	0.000222243	-0.4	0.000117256
DDX1	ENSG00000079785.16	DEAD-box helicase 1	protein_coding	-0.24	6.95	9.42324e-06	3.69964e-06	-0.49	7.14495e-07
WWP1	ENSG00000123124.14	WW domain containing E3 ubiquitin protein ligase 1	protein_coding	-0.24	6.64	0.0427628	4.08716e-05	-0.44	1.52015e-05
C2CD5	ENSG00000111731.12	C2 calcium dependent domain containing 5	protein_coding	-0.24	5.65	0.00230706	5.88383e-05	-0.43	2.37578e-05
STAT3	ENSG00000168610.16	signal transducer and activator of transcription 3	protein_coding	-0.23	8.21	0.0054066	0.00749288	-0.3	0.00631942
UBR5	ENSG00000104517.13	ubiquitin protein ligase E3 component n-recognin 5	protein_coding	-0.23	6.45	0.0188194	0.0362038	-0.24	0.034075
ARHGAP12	ENSG00000165322.18	Rho GTPase activating protein 12	protein_coding	-0.23	5.63	0.00971701	2.82793e-05	-0.45	9.63257e-06
MTM1	ENSG00000171100.15	myotubularin 1	protein_coding	-0.23	4.57	0.0211235	0.00247429	-0.33	0.00186398
[truncated: 1,047 more rows]

## Sheet: Table 8_miR-18a-5p
gene	Gene_id	Description	Biotype	LogFC	LogCPM	QLF_FDR	MW_FDR	Spearman_correlation_coef	Spearman_correlation_FDR
[truncated: 667 more rows]

[truncated: 1 more sheets: Table 9_miR-483-5p]
